# Supplementary material
Source: publisher figshare collection journal article supplement (https://diabetesjournals.figshare.com/articles/dataset/_/24061539)
Supplement: Supplementary file 1 [file 1]

| <b>Supplemental Tables S4-S18</b>                                                                                                                                                                            |
|--------------------------------------------------------------------------------------------------------------------------------------------------------------------------------------------------------------|
| <a href="#">Table S4. Meta-analysis results of associations between dietary glycemic index and blood DNA methylation (whole group, top 5 findings based on nominal P-value)</a>                              |
| <a href="#">Table S5. Meta-analysis results of associations between dietary glycemic load and blood DNA methylation (whole group, top 5 findings based on nominal P-value)</a>                               |
| <a href="#">Table S6. Meta-analysis results of associations between dietary glycemic index and blood DNA methylation (participants with normal-weight, FDR &lt;0.05)</a>                                     |
| <a href="#">Table S7. Meta-analysis results of associations between dietary glycemic index and blood DNA methylation (participants with overweight/obesity, FDR &lt;0.05)</a>                                |
| <a href="#">Table S8. Meta-analysis results of associations between dietary glycemic load and blood DNA methylation (participants with normal-weight, FDR &lt;0.05)</a>                                      |
| <a href="#">Table S9. Meta-analysis results of associations between dietary glycemic load and blood DNA methylation (participants with overweight/obesity, FDR &lt;0.05)</a>                                 |
| <a href="#">Table S10. Meta-analysis results of the BMI-stratified models (all findings, FDR &lt;0.05) and corresponding effect estimates of the opposed BMI-group and the whole group</a>                   |
| <a href="#">Table S11. Overlapping CpGs between meta-analyses results (FDR &lt;0.05) and the EWAS catalogue</a>                                                                                              |
| <a href="#">Table S12. Associations between age and sex and GI/GL for the identified CpGs in the TEENDIAB cohort</a>                                                                                         |
| <a href="#">Table S13. Subset of CpGs (Table S12) overlapping with multiple traits in the EWAS catalogue (without the traits: age, sex, tissue, papuan ancestry)</a>                                         |
| <a href="#">Table S14. Meta-analyses results overlapping with mQTLs from the ARIES database</a>                                                                                                              |
| <a href="#">Table S15. Mendelian randomization (two-sample) between the overlapping mQTL and public GWAS data</a>                                                                                            |
| <a href="#">Table S16. Overlapping CpGs between meta-analyses results (FDR &lt;0.05) and blood cis-eQTM in children of the HELIX project (cell type adjusted)</a>                                            |
| <a href="#">Table S17. Overlapping CpGs between meta-analyses results (FDR &lt;0.05) and subcutaneous adipose tissue cis-eQTM in children and adolescents of the Leipzig Childhood Adipose Tissue Cohort</a> |
| <a href="#">Table S18. Enrichments for genomic regulatory regions using LOLA CORE within significant CpGs (FDR &lt;0.05) of normal weight or overweight/obese models</a>                                     |

**Table S4. Meta-analysis results of associations between dietary glycemic index and blood DNA methylation (whole group, top 5 findings based on nominal P-value)**

\*Cohort abbreviations: ATHOB: ATHEROBESITY, LIFE: LIFE Child, TD: TEENDIAB, RAINE: Raine Study Gen2, NFBC: NFBC1986

| CpG        | Chromosome | Position (hg19) | Relation to Island | Nearest Gene (Illumina annotation) | Total number | Beta coefficient | Standard error | nominal P-value | FDR-corrected P-value | I-squared | Heterogeneity test P-value | Direction of effect in each cohort (order as listed in Cohort included) | Cohort included*              | Probe availability |
|------------|------------|-----------------|--------------------|------------------------------------|--------------|------------------|----------------|-----------------|-----------------------|-----------|----------------------------|-------------------------------------------------------------------------|-------------------------------|--------------------|
| cg00008075 | 5          | 126938799       | OpenSea            |                                    | 398          | -0.4541          | 0.0861         | 1.34e-07        | 0.09367               | 67.6      | 0.0456                     | ---                                                                     | ATHOB,LIFE,TD                 | EPIC               |
| cg01578632 | 16         | 69958298        | OpenSea            | WWP2                               | 1188         | -0.0251          | 0.0051         | 8.70e-07        | 0.12148               | 0         | 0.7045                     | -----                                                                   | ATHOB,INMA,LIFE,TD,NFBC,RAINE | 450K/EPIC          |
| cg11616283 | 2          | 26101360        | Island             | ASXL2                              | 398          | 0.0303           | 0.0061         | 7.88e-07        | 0.12148               | 0         | 0.5501                     | +++                                                                     | ATHOB,LIFE,TD                 | EPIC               |
| cg15042047 | 7          | 151317177       | OpenSea            | PRKAG2                             | 398          | -0.0520          | 0.0102         | 3.71e-07        | 0.12148               | 0         | 0.9991                     | ---                                                                     | ATHOB,LIFE,TD                 | EPIC               |
| cg08077269 | 1          | 45301514        | OpenSea            | PTCH2                              | 398          | -0.1505          | 0.0318         | 1.06e-06        | 0.12148               | 0         | 0.4654                     | ---                                                                     | ATHOB,LIFE,TD                 | EPIC               |

**Table S5. Meta-analysis results of associations between dietary glycemic load and blood DNA methylation (whole group, top 5 findings based on nominal P-value)**

\*Cohort abbreviations: ATHOB: ATHEROBESITY, LIFE: LIFE Child, TD: TEENDIAB, RAINE: Raine Study Gen2, NFBC: NFBC1986

| CpG        | Chromosome | Position (hg19) | Relation to Island | Nearest Gene (Illumina annotation) | Total number | Beta coefficient | Standard error | nominal P-value | FDR-corrected P-value | I-squared | Heterogeneity test P-value | Direction of effect in each cohort (order as listed in Cohort included) | Cohort included*  | Probe availability |
|------------|------------|-----------------|--------------------|------------------------------------|--------------|------------------|----------------|-----------------|-----------------------|-----------|----------------------------|-------------------------------------------------------------------------|-------------------|--------------------|
| cg20274553 | 6          | 169939263       | OpenSea            | WDR27                              | 691          | 0.0023           | 0.0004         | 3.26e-08        | 0.0224                | 0         | 0.6480                     | +++                                                                     | INMA,LIFE,TD,NFBC | 450K/EPIC          |
| cg02978505 | 16         | 85292322        | OpenSea            |                                    | 693          | -0.0656          | 0.0128         | 3.05e-07        | 0.0696                | 28.6      | 0.2404                     | --+                                                                     | INMA,LIFE,TD,NFBC | 450K/EPIC          |
| cg20965602 | 19         | 29993879        | OpenSea            | LOC284395                          | 289          | -0.0193          | 0.0037         | 2.13e-07        | 0.0696                | 0         | 0.6336                     | --                                                                      | LIFE,TD           | EPIC               |
| cg22542699 | 2          | 208205302       | OpenSea            |                                    | 693          | 0.0022           | 0.0004         | 4.61e-07        | 0.0791                | 52.7      | 0.0960                     | ++                                                                      | INMA,LIFE,TD,NFBC | 450K/EPIC          |
| cg05855306 | 3          | 119107484       | OpenSea            | ARHGAP31                           | 289          | 0.0086           | 0.0017         | 8.07e-07        | 0.0923                | 89.9      | 0.0016                     | ++                                                                      | LIFE,TD           | EPIC               |

**Table S6. Meta-analysis results of associations between dietary glycemic index and blood DNA methylation (participants with normal-weight, FDR <0.05)**

\*Cohort abbreviations: ATHOB: ATHEROBESITY, LIFE: LIFE Child, TD: TEENDIAB, RAINE: Raine Study Gen2, NFBC: NFBC1986

| CpG        | Chromosome | Position (hg19) | Relation to Island | Nearest Gene (Illumina annotation) | Total number | Beta coefficient | Standard error | nominal P-value | FDR-corrected P-value | I-squared | Heterogeneity test P-value | Direction of effect in each cohort (order as listed in Cohort included) | Cohort included*              | Probe availability |
|------------|------------|-----------------|--------------------|------------------------------------|--------------|------------------|----------------|-----------------|-----------------------|-----------|----------------------------|-------------------------------------------------------------------------|-------------------------------|--------------------|
| cg08951101 | 2          | 25639759        | OpenSea            | DTNB                               | 219          | -0.3736          | 0.0438         | 1.57e-17        | 1.09e-11              | 94.9      | 2.32e-09                   | →                                                                       | TD,LIFE,ATHOB                 | EPIC               |
| cg21859546 | 12         | 3563766         | OpenSea            | PRMT8                              | 219          | 0.5461           | 0.0779         | 2.39e-12        | 7.99e-07              | 93.1      | 4.18e-07                   | →                                                                       | TD,LIFE,ATHOB                 | EPIC               |
| cg22460923 | 1          | 21900915        | OpenSea            | ALPL                               | 219          | 0.2324           | 0.0334         | 3.44e-12        | 7.99e-07              | 90.5      | 2.54e-05                   | +++                                                                     | TD,LIFE,ATHOB                 | EPIC               |
| cg03827836 | 1          | 2254127         | Island             | MORN1                              | 219          | 0.1134           | 0.0371         | 3.88e-11        | 6.75e-06              | 96.9      | 9.11e-15                   | +++                                                                     | TD,LIFE,ATHOB                 | EPIC               |
| cg26153425 | 3          | 108257188       | OpenSea            |                                    | 219          | -0.2743          | 0.0452         | 1.35e-09        | 1.80e-05              | 53.2      | 0.1180                     | ---                                                                     | TD,LIFE,ATHOB                 | EPIC               |
| cg00008075 | 5          | 126938799       | OpenSea            |                                    | 219          | -0.5721          | 0.1032         | 2.95e-08        | 0.0029                | 93.2      | 3.47e-07                   | →                                                                       | TD,LIFE,ATHOB                 | EPIC               |
| cg05094137 | 16         | 53125208        | OpenSea            | CHD9                               | 801          | -0.0985          | 0.0177         | 2.98e-08        | 0.0029                | 88.1      | 5.07e-08                   | →+→                                                                     | INMA,TD,LIFE,ATHOB,NFBC,RAINE | 450K/EPIC          |
| cg23605244 | 1          | 205633005       | S_Shore            | SLC45A3                            | 219          | 0.2230           | 0.0405         | 3.65e-08        | 0.0031                | 82.6      | 0.0031                     | +++                                                                     | TD,LIFE,ATHOB                 | EPIC               |
| cg07980773 | 17         | 73322422        | OpenSea            | GRB2                               | 219          | 0.1945           | 0.0359         | 6.07e-08        | 0.0038                | 0         | 0.3704                     | +++                                                                     | TD,LIFE,ATHOB                 | EPIC               |
| cg10709645 | 16         | 67998039        | N_Shelf            | SLC12A4                            | 219          | -0.5322          | 0.0978         | 5.38e-08        | 0.0038                | 71.3      | 0.0303                     | ---                                                                     | TD,LIFE,ATHOB                 | EPIC               |
| cg14272204 | 2          | 233306057       | OpenSea            |                                    | 219          | -0.1232          | 0.0226         | 5.56e-08        | 0.0038                | 89.8      | 5.39e-05                   | ---                                                                     | TD,LIFE,ATHOB                 | EPIC               |
| cg15506702 | 4          | 7472891         | OpenSea            | SORCS2                             | 219          | 0.0943           | 0.0175         | 6.66e-08        | 0.0038                | 42.4      | 0.1759                     | +++                                                                     | TD,LIFE,ATHOB                 | EPIC               |
| cg20101433 | 6          | 30130922        | OpenSea            | TRIM15                             | 219          | 0.2988           | 0.0560         | 9.79e-08        | 0.0052                | 89.8      | 5.19e-05                   | +++                                                                     | TD,LIFE,ATHOB                 | EPIC               |
| cg03688771 | 22         | 31101205        | OpenSea            | OSBP2                              | 219          | 0.2484           | 0.0468         | 1.16e-07        | 0.0053                | 63.2      | 0.0657                     | +++                                                                     | TD,LIFE,ATHOB                 | EPIC               |
| cg23979983 | 4          | 107597761       | OpenSea            |                                    | 219          | 0.2129           | 0.0401         | 1.11e-07        | 0.0053                | 41.2      | 0.1823                     | +++                                                                     | TD,LIFE,ATHOB                 | EPIC               |
| cg00087645 | 6          | 157040279       | N_Shore            |                                    | 801          | -0.0295          | 0.0056         | 1.54e-07        | 0.0067                | 38.1      | 0.151                      | -----                                                                   | INMA,TD,LIFE,ATHOB,NFBC,RAINE | 450K/EPIC          |
| cg07513425 | 13         | 113531725       | OpenSea            | ATP11A                             | 219          | -0.1311          | 0.0252         | 1.99e-07        | 0.0081                | 0         | 0.6307                     | ---                                                                     | TD,LIFE,ATHOB                 | EPIC               |
| cg03128522 | 17         | 25788807        | OpenSea            |                                    | 219          | 0.3836           | 0.0740         | 2.18e-07        | 0.0082                | 62.1      | 0.0710                     | +++                                                                     | TD,LIFE,ATHOB                 | EPIC               |
| cg17282830 | 12         | 88427966        | N_Shore            | C12orf29                           | 219          | -0.2222          | 0.0430         | 2.37e-07        | 0.0082                | 50.9      | 0.1301                     | ---                                                                     | TD,LIFE,ATHOB                 | EPIC               |
| cg19802547 | 2          | 103281097       | OpenSea            | SLC9A2                             | 219          | -0.2663          | 0.0515         | 2.28e-07        | 0.0082                | 82.0      | 0.0038                     | →                                                                       | TD,LIFE,ATHOB                 | EPIC               |
| cg02184558 | 16         | 68104456        | OpenSea            | DUS2                               | 219          | 1.2527           | 0.2450         | 3.16e-07        | 0.0105                | 62.8      | 0.0677                     | +++                                                                     | TD,LIFE,ATHOB                 | EPIC               |
| cg05432558 | 17         | 62632136        | OpenSea            | SMURF2                             | 219          | 0.2728           | 0.0537         | 3.92e-07        | 0.0113                | 0         | 0.8659                     | +++                                                                     | TD,LIFE,ATHOB                 | EPIC               |
| cg08743514 | 17         | 62543786        | OpenSea            | SMURF2                             | 219          | -0.0984          | 0.0195         | 4.59e-07        | 0.0113                | 80.7      | 0.0055                     | ---                                                                     | TD,LIFE,ATHOB                 | EPIC               |
| cg10349674 | 9          | 14723209        | OpenSea            | CER1                               | 219          | 0.4701           | 0.0934         | 4.94e-07        | 0.0113                | 87.7      | 0.0002                     | +++                                                                     | TD,LIFE,ATHOB                 | EPIC               |
| cg12022532 | 8          | 144473948       | OpenSea            |                                    | 219          | -0.1984          | 0.0395         | 5.05e-07        | 0.0113                | 90.2      | 3.49e-05                   | ---                                                                     | TD,LIFE,ATHOB                 | EPIC               |
| cg12884719 | 1          | 232246264       | OpenSea            |                                    | 219          | 0.3251           | 0.0643         | 4.35e-07        | 0.0113                | 54.6      | 0.1102                     | +++                                                                     | TD,LIFE,ATHOB                 | EPIC               |
| cg14051770 | 7          | 76054572        | OpenSea            | ZP3                                | 801          | 0.1194           | 0.0239         | 4.99e-07        | 0.0113                | 93.8      | 4.17e-16                   | ++++                                                                    | INMA,TD,LIFE,ATHOB,NFBC,RAINE | 450K/EPIC          |
| cg15589104 | 16         | 50309171        | OpenSea            | ADCY7                              | 88           | 0.2672           | 0.0529         | 4.52e-07        | 0.0113                | 88.3      | 0.0033                     | ++                                                                      | LIFE,ATHOB                    | EPIC               |
| cg19821999 | 2          | 236520219       | OpenSea            | AGAP1                              | 219          | -0.2881          | 0.0573         | 5.02e-07        | 0.0113                | 42.1      | 0.1775                     | ---                                                                     | TD,LIFE,ATHOB                 | EPIC               |
| cg23427404 | 10         | 29546610        | OpenSea            |                                    | 219          | 0.4741           | 0.0933         | 3.72e-07        | 0.0113                | 0         | 0.8945                     | +++                                                                     | TD,LIFE,ATHOB                 | EPIC               |
| cg25082074 | 3          | 17520378        | OpenSea            | TBC1D5                             | 219          | 0.3376           | 0.0668         | 4.30e-07        | 0.0113                | 82.9      | 0.0028                     | +++                                                                     | TD,LIFE,ATHOB                 | EPIC               |
| cg12332383 | 5          | 89908984        | OpenSea            | ADGRV1                             | 219          | 0.2592           | 0.0517         | 5.37e-07        | 0.0115                | 75.8      | 0.0158                     | +++                                                                     | TD,LIFE,ATHOB                 | EPIC               |
| cg19363465 | 5          | 608391          | N_Shelf            | LOC100996325                       | 219          | 0.1737           | 0.0347         | 5.46e-07        | 0.0115                | 91.4      | 8.88e-06                   | +++                                                                     | TD,LIFE,ATHOB                 | EPIC               |
| cg15264825 | 3          | 42885449        | OpenSea            | ACKR2                              | 219          | 0.2391           | 0.0479         | 6.01e-07        | 0.0122                | 0         | 0.4120                     | +++                                                                     | TD,LIFE,ATHOB                 | EPIC               |
| cg01160763 | 16         | 86124162        | OpenSea            |                                    | 219          | -0.2861          | 0.0578         | 7.65e-07        | 0.0152                | 71.0      | 0.0314                     | ---                                                                     | TD,LIFE,ATHOB                 | EPIC               |
| cg24147838 | 19         | 54876664        | OpenSea            | LAIR1                              | 801          | 0.1265           | 0.0256         | 8.00e-07        | 0.0154                | 0         | 0.9904                     | +++++                                                                   | INMA,TD,LIFE,ATHOB,NFBC,RAINE | 450K/EPIC          |
| cg02795334 | 10         | 119659156       | OpenSea            |                                    | 801          | -0.2086          | 0.0423         | 8.39e-07        | 0.0155                | 87.5      | 1.34e-07                   | ++++                                                                    | INMA,TD,LIFE,ATHOB,NFBC,RAINE | 450K/EPIC          |
| cg15047408 | 20         | 42427235        | OpenSea            |                                    | 219          | -0.2374          | 0.0482         | 8.50e-07        | 0.0155                | 83.3      | 0.0024                     | →                                                                       | TD,LIFE,ATHOB                 | EPIC               |
| cg02914589 | 20         | 61309080        | OpenSea            |                                    | 219          | 0.2667           | 0.0543         | 9.22e-07        | 0.0161                | 61.5      | 0.0742                     | +++                                                                     | TD,LIFE,ATHOB                 | EPIC               |
| cg23237607 | 14         | 91528264        | S_Shore            | RPS6KA5                            | 219          | -0.1919          | 0.0391         | 9.27e-07        | 0.0161                | 87.2      | 0.0004                     | →                                                                       | TD,LIFE,ATHOB                 | EPIC               |
| cg04813149 | 7          | 130003263       | OpenSea            | CPA5                               | 219          | 0.0852           | 0.0173         | 9.54e-07        | 0.0161                | 91.8      | 4.39e-06                   | +++                                                                     | TD,LIFE,ATHOB                 | EPIC               |
| cg22343910 | 9          | 116726212       | OpenSea            | ZNF618                             | 219          | -0.0783          | 0.0160         | 1.11e-06        | 0.0184                | 90.6      | 2.20e-05                   | ---                                                                     | TD,LIFE,ATHOB                 | EPIC               |
| cg21189242 | 17         | 7222189         | S_Shelf            | NEURL4                             | 219          | -0.0504          | 0.0103         | 1.21e-06        | 0.0196                | 93.0      | 5.42e-07                   | →                                                                       | TD,LIFE,ATHOB                 | EPIC               |
| cg27039257 | 3          | 185533592       | OpenSea            | IGF2BP2                            | 219          | 0.3124           | 0.0644         | 1.25e-06        | 0.0198                | 85.9      | 0.0007                     | +++                                                                     | TD,LIFE,ATHOB                 | EPIC               |
| cg00774406 | 7          | 129445517       | OpenSea            |                                    | 219          | 0.1743           | 0.0360         | 1.31e-06        | 0.0203                | 37.8      | 0.2002                     | +++                                                                     | TD,LIFE,ATHOB                 | EPIC               |
| cg08906056 | 3          | 112214284       | OpenSea            | BTLA                               | 219          | -0.3063          | 0.0634         | 1.36e-06        | 0.0203                | 0         | 0.5464                     | ---                                                                     | TD,LIFE,ATHOB                 | EPIC               |
| cg22879270 | 15         | 40987177        | Island             | RAD51                              | 801          | 0.0203           | 0.0042         | 1.40e-06        | 0.0203                | 44.6      | 0.1077                     | ++++→                                                                   | INMA,TD,LIFE,ATHOB,NFBC,RAINE | 450K/EPIC          |
| cg24363299 | 19         | 15391923        | OpenSea            | BRD4                               | 219          | 0.2549           | 0.0528         | 1.38e-06        | 0.0203                | 0         | 0.6651                     | +++                                                                     | TD,LIFE,ATHOB                 | EPIC               |
| cg05327271 | 16         | 1364473         | Island             | UBE2I                              | 88           | 0.2888           | 0.0600         | 1.49e-06        | 0.0212                | 59.1      | 0.1178                     | ++                                                                      | LIFE,ATHOB                    | EPIC               |
| cg08893641 | 6          | 100016580       | Island             | CCNC                               | 219          | 0.0889           | 0.0185         | 1.56e-06        | 0.0217                | 0         | 0.4785                     | +++                                                                     | TD,LIFE,ATHOB                 | EPIC               |
| cg01530292 | 19         | 5669474         | OpenSea            |                                    | 219          | 0.2524           | 0.0528         | 1.73e-06        | 0.0225                | 67.1      | 0.0477                     | +++                                                                     | TD,LIFE,ATHOB                 | EPIC               |
| cg20715159 | 5          | 142305468       | OpenSea            | ARHGAP26                           | 219          | 0.2459           | 0.0514         | 1.75e-06        | 0.0225                | 0         | 0.9985                     | +++                                                                     | TD,LIFE,ATHOB                 | EPIC               |
| cg24618945 | 20         | 24448346        | N_Shore            | SYNDIG1                            | 219          | -0.2858          | 0.0597         | 1.72e-06        | 0.0225                | 86.5      | 0.0005                     | ---                                                                     | TD,LIFE,ATHOB                 | EPIC               |
| cg27412523 | 6          | 144656847       | OpenSea            | UTRN                               | 219          | -0.1306          | 0.0272         | 1.65e-06        | 0.0225                | 83.1      | 0.0026                     | →                                                                       | TD,LIFE,ATHOB                 | EPIC               |
| cg16533029 | 4          | 26624784        | OpenSea            | TBC1D19                            | 219          | 0.2583           | 0.0541         | 1.79e-06        | 0.0227                | 85.7      | 0.0009                     | +++                                                                     | TD,LIFE,ATHOB                 | EPIC               |
| cg03185855 | 2          | 145135549       | OpenSea            |                                    | 219          | 0.2091           | 0.0439         | 1.97e-06        | 0.0244                | 83.1      | 0.0026                     | ++                                                                      | TD,LIFE,ATHOB                 | EPIC               |
| cg07456387 | 22         | 33819282        | OpenSea            | LARGE                              | 219          | -0.2031          | 0.0428         | 2.08e-06        | 0.0254                | 84.0      | 0.0019                     | ---                                                                     | TD,LIFE,ATHOB                 | EPIC               |
| cg04126424 | 9          | 139552999       | Island             | EGFL7                              | 219          | 0.3098           | 0.0655         | 2.25e-06        | 0.0270                | 40.9      | 0.1839                     | +++                                                                     | TD,LIFE,ATHOB                 | EPIC               |
| cg13679804 | 3          | 59734950        | OpenSea            |                                    | 801          | 0.1575           | 0.0334         | 2.48e-06        | 0.0292                | 79.9      | 0.0001                     | +++++                                                                   | INMA,TD,LIFE,ATHOB,NFBC,RAINE | 450K/EPIC          |
| cg12736692 | 12         | 131261223       | OpenSea            |                                    | 219          | -0.0843          | 0.0179         | 2.68e-06        | 0.0309                | 0         | 0.7783                     | ---                                                                     | TD,LIFE,ATHOB                 | EPIC               |
| cg20938391 | 19         | 47157980        | OpenSea            | DACT3                              | 219          | -0.3273          | 0.0697         | 2.71e-06        | 0.0309                | 62.1      | 0.0709                     | ---                                                                     | TD,LIFE,ATHOB                 | EPIC               |
| cg01845076 | 17         | 2834545         | OpenSea            | RAP1GAP2                           | 219          | -0.3485          | 0.0747         | 3.09e-06        | 0.0341                | 0         | 0.7384                     | ---                                                                     | TD,LIFE,ATHOB                 | EPIC               |
| cg07976823 | 15         | 59277818        | N_Shore            |                                    | 219          | 0.2563           | 0.0549         | 3.06e-06        | 0.0341                | 64.3      | 0.0603                     | +++                                                                     | TD,LIFE,ATHOB                 | EPIC               |
| cg00719768 | 7          | 1465349         | OpenSea            |                                    | 219          | -0.3543          | 0.0761         | 3.26e-06        | 0.0345                | 69.6      | 0.0369                     | ---                                                                     | TD,LIFE,ATHOB                 | EPIC               |
| cg02994628 | 17         | 17783312        | OpenSea            | TOM1L2                             | 219          | -0.0619          | 0.0133         | 3.27e-06        | 0.0345                | 92.8      | 8.56e-07                   | →                                                                       | TD,LIFE,ATHOB                 | EPIC               |
| cg11237901 | 1          | 19272128        | OpenSea            | IFFO2                              | 219          | -0.5548          | 0.1192         | 3.25e-06        | 0.0345                | 91.8      | 4.73e-06                   | →                                                                       | TD,LIFE,ATHOB                 | EPIC               |
| cg11566411 | 15         | 74546146        | OpenSea            | CCDC33                             | 219          | 0.1810           | 0.0389         | 3.41e-06        | 0.0348                | 63.5      | 0.0644                     | +++                                                                     | TD,LIFE,ATHOB                 | EPIC               |

|            |    |           |         |                 |     |         |        |          |        |      |        |       |                               |           |
|------------|----|-----------|---------|-----------------|-----|---------|--------|----------|--------|------|--------|-------|-------------------------------|-----------|
| cg16777780 | 17 | 76862186  | OpenSea | TIMP2           | 219 | 0.2169  | 0.0467 | 3.40e-06 | 0.0348 | 57.9 | 0.0925 | +++   | TD,LIFE,ATHOB                 | EPIC      |
| cg12652118 | 8  | 22858539  | S_Shore | RHOBTB2         | 219 | -0.1597 | 0.0345 | 3.81e-06 | 0.0384 | 81.2 | 0.0048 | ---   | TD,LIFE,ATHOB                 | EPIC      |
| cg00418087 | 17 | 17022001  | OpenSea | MPRIIP          | 219 | -0.0378 | 0.0082 | 4.29e-06 | 0.0412 | 36.9 | 0.2048 | ++    | TD,LIFE,ATHOB                 | EPIC      |
| cg04426554 | 2  | 31164957  | OpenSea | GALNT14         | 219 | -0.1139 | 0.0247 | 4.32e-06 | 0.0412 | 0    | 0.4462 | ---   | TD,LIFE,ATHOB                 | EPIC      |
| cg27070405 | 5  | 131430689 | OpenSea |                 | 219 | 0.2364  | 0.0513 | 4.18e-06 | 0.0412 | 46.7 | 0.1529 | +++   | TD,LIFE,ATHOB                 | EPIC      |
| cg27302237 | 3  | 138594859 | OpenSea |                 | 219 | 0.2501  | 0.0544 | 4.29e-06 | 0.0412 | 59.3 | 0.0852 | ++    | TD,LIFE,ATHOB                 | EPIC      |
| cg12571155 | 1  | 226849456 | OpenSea | ITPK8-IT1,ITPKB | 219 | -0.1294 | 0.0282 | 4.48e-06 | 0.0416 | 0    | 0.7852 | ---   | TD,LIFE,ATHOB                 | EPIC      |
| cg23928104 | 1  | 53035437  | OpenSea |                 | 219 | -0.1954 | 0.0425 | 4.44e-06 | 0.0416 | 14.3 | 0.3112 | ---   | TD,LIFE,ATHOB                 | EPIC      |
| cg22264898 | 18 | 3297176   | OpenSea |                 | 801 | 0.2063  | 0.0450 | 4.54e-06 | 0.0416 | 66.8 | 0.0100 | +++++ | INMA,TD,LIFE,ATHOB,NFBC,RAINE | 450K/EPIC |
| cg02439540 | 3  | 53705820  | OpenSea | CACNA1D         | 219 | 0.1934  | 0.0422 | 4.76e-06 | 0.0425 | 11.6 | 0.3223 | +++   | TD,LIFE,ATHOB                 | EPIC      |
| cg05336486 | 18 | 20694580  | OpenSea |                 | 219 | 0.1973  | 0.0431 | 4.71e-06 | 0.0425 | 69.6 | 0.0370 | +++   | TD,LIFE,ATHOB                 | EPIC      |
| cg16696646 | 17 | 19861616  | OpenSea | AKAP10          | 219 | -0.1619 | 0.0354 | 4.90e-06 | 0.0426 | 0    | 0.4469 | ---   | TD,LIFE,ATHOB                 | EPIC      |
| cg19989895 | 3  | 189034635 | OpenSea | TPRG1           | 219 | -0.1386 | 0.0303 | 4.88e-06 | 0.0426 | 48.9 | 0.1410 | ---   | TD,LIFE,ATHOB                 | EPIC      |
| cg16350349 | 2  | 3751593   | Island  | DCDC2C          | 219 | 0.3052  | 0.0669 | 5.21e-06 | 0.0431 | 86.3 | 0.0006 | +++   | TD,LIFE,ATHOB                 | EPIC      |
| cg21322819 | 15 | 74420657  | Island  | LOC283731;ISLR2 | 801 | 0.0467  | 0.0102 | 5.20e-06 | 0.0431 | 12.0 | 0.3379 | +++++ | INMA,TD,LIFE,ATHOB,NFBC,RAINE | 450K/EPIC |
| cg23229584 | 9  | 133656857 | OpenSea | ABL1            | 219 | 0.0470  | 0.0103 | 5.04e-06 | 0.0431 | 0    | 0.7793 | ++    | TD,LIFE,ATHOB                 | EPIC      |
| cg23541273 | 2  | 27631826  | N_Shore | PPM1G           | 401 | 0.1692  | 0.0371 | 5.11e-06 | 0.0431 | 58.0 | 0.1226 | ++    | INMA,RAINE                    | 450K      |
| cg08749419 | 4  | 6130359   | OpenSea | JAKMIP1         | 219 | -0.1351 | 0.0298 | 6.05e-06 | 0.0495 | 75.2 | 0.0175 | ---   | TD,LIFE,ATHOB                 | EPIC      |

**Table S7. Meta-analysis results of associations between dietary glycemic index and blood DNA methylation (participants with overweight/obesity, FDR <0.05)**

\*Cohort abbreviations: ATHOB: ATHEROBESITY, LIFE: LIFE Child, TD: TEENDIAB, RAINE: Raine Study Gen2, NFBC: NFBC1986

| CpG        | Chromosome | Position (hg19) | Relation to Island | Nearest Gene (Illumina annotation) | Total number | Beta coefficient | Standard error | nominal P-value | FDR-corrected P-value | I-squared | Heterogeneity test P-value | Direction of effect in each cohort (order as listed in Cohort included) | Cohort included*              | Probe availability |
|------------|------------|-----------------|--------------------|------------------------------------|--------------|------------------|----------------|-----------------|-----------------------|-----------|----------------------------|-------------------------------------------------------------------------|-------------------------------|--------------------|
| cg05164421 | 6          | 94164464        | OpenSea            |                                    | 173          | 0.3923           | 0.0454         | 5.74e-18        | 3.99e-12              | 96.6      | 1.60e-13                   | ++                                                                      | TD,LIFE,ATHOB                 | EPIC               |
| cg00333193 | 5          | 180673604       | Island             |                                    | 210          | 0.2646           | 0.0374         | 1.63e-12        | 5.70e-07              | 92.2      | 2.53e-06                   | ++                                                                      | INMA,NFBC,RAINE               | 450K               |
| cg05399244 | 17         | 179611          | OpenSea            | RPH3AL                             | 386          | -0.1531          | 0.0226         | 1.29e-11        | 2.99e-06              | 82.8      | 2.10e-05                   | +++                                                                     | INMA,TD,LIFE,ATHOB,NFBC,RAINE | 450K/EPIC          |
| cg07151406 | 10         | 99185290        | N_Shore            | PGAM1                              | 210          | 0.4022           | 0.0609         | 4.01e-11        | 6.98e-06              | 95.4      | 2.89e-10                   | ++                                                                      | INMA,NFBC,RAINE               | 450K               |
| cg17828057 | 8          | 42037527        | OpenSea            | PLAT                               | 386          | -0.3613          | 0.0572         | 2.75e-10        | 3.83e-05              | 80.8      | 8.73e-05                   | +++                                                                     | INMA,TD,LIFE,ATHOB,NFBC,RAINE | 450K/EPIC          |
| cg05747251 | 18         | 6375665         | OpenSea            | MIR4317;L3MBTL4                    | 176          | 0.2535           | 0.0412         | 7.82e-10        | 9.06e-05              | 70.7      | 0.0328                     | +++                                                                     | TD,LIFE,ATHOB                 | EPIC               |
| cg14558716 | 12         | 51178930        | OpenSea            | ATF1                               | 210          | 0.2285           | 0.0388         | 4.13e-09        | 0.0004                | 75.0      | 0.0182                     | +++                                                                     | INMA,NFBC,RAINE               | 450K               |
| cg19706472 | 1          | 44462672        | OpenSea            | SLC6A9                             | 385          | -0.0671          | 0.0115         | 6.18e-09        | 0.0005                | 80.1      | 0.0001                     | ++++                                                                    | INMA,TD,LIFE,ATHOB,NFBC,RAINE | 450K/EPIC          |
| cg10506615 | 9          | 140960494       | OpenSea            | CACNA1B                            | 176          | 0.3300           | 0.0576         | 1.04e-08        | 0.0008                | 84.7      | 0.0014                     | ++                                                                      | TD,LIFE,ATHOB                 | EPIC               |
| cg17747781 | 8          | 143383498       | OpenSea            | TSNARE1                            | 176          | -0.3376          | 0.0595         | 1.46e-08        | 0.0010                | 94.3      | 2.17e-08                   | ++                                                                      | TD,LIFE,ATHOB                 | EPIC               |
| cg19784286 | 1          | 231483405       | OpenSea            | SPRNT                              | 173          | -0.1624          | 0.0287         | 1.69e-08        | 0.0010                | 41.3      | 0.1817                     | ++                                                                      | TD,LIFE,ATHOB                 | EPIC               |
| cg04831280 | 18         | 19915792        | OpenSea            |                                    | 174          | 0.1705           | 0.0303         | 1.99e-08        | 0.0011                | 0         | 0.4080                     | +++                                                                     | TD,LIFE,ATHOB                 | EPIC               |
| cg00961418 | 11         | 8616172         | S_Shore            | STK33                              | 385          | 0.1603           | 0.0287         | 2.43e-08        | 0.0013                | 74.4      | 0.0015                     | +++                                                                     | INMA,TD,LIFE,ATHOB,NFBC,RAINE | 450K/EPIC          |
| cg01407748 | 9          | 124459125       | N_Shore            | DAB2IP                             | 327          | -0.1210          | 0.0220         | 3.97e-08        | 0.0019                | 84.7      | 2.76e-05                   | ++++                                                                    | INMA,TD,LIFE,ATHOB,RAINE      | 450K/EPIC          |
| cg13422870 | 9          | 102671668       | S_Shelf            | STX17                              | 385          | -0.0970          | 0.0179         | 5.94e-08        | 0.0027                | 65.7      | 0.0121                     | +++                                                                     | INMA,TD,LIFE,ATHOB,NFBC,RAINE | 450K/EPIC          |
| cg13679817 | 9          | 16337094        | OpenSea            |                                    | 385          | 0.1128           | 0.0210         | 8.20e-08        | 0.0035                | 0         | 0.4376                     | ++++                                                                    | INMA,TD,LIFE,ATHOB,NFBC,RAINE | 450K/EPIC          |
| cg07040338 | 7          | 2402133         | OpenSea            | EIF3B                              | 386          | -0.0417          | 0.0078         | 9.08e-08        | 0.0037                | 50.2      | 0.0740                     | ++++                                                                    | INMA,TD,LIFE,ATHOB,NFBC,RAINE | 450K/EPIC          |
| cg18840037 | 13         | 23345238        | OpenSea            |                                    | 385          | -0.0543          | 0.0102         | 1.19e-07        | 0.0043                | 80.7      | 9.19e-05                   | ++++                                                                    | INMA,TD,LIFE,ATHOB,NFBC,RAINE | 450K/EPIC          |
| cg24762053 | 20         | 36148798        | Island             | NNAT;BLCAP                         | 386          | -0.1654          | 0.0311         | 1.13e-07        | 0.0043                | 72.9      | 0.0024                     | +++                                                                     | INMA,TD,LIFE,ATHOB,NFBC,RAINE | 450K/EPIC          |
| cg25603927 | 10         | 99185264        | N_Shore            | PGAM1                              | 386          | 0.3672           | 0.0699         | 1.49e-07        | 0.0052                | 88.0      | 6.54e-08                   | +++                                                                     | INMA,TD,LIFE,ATHOB,NFBC,RAINE | 450K/EPIC          |
| cg17660251 | 3          | 142548853       | OpenSea            | PCOLCE2                            | 176          | 0.1166           | 0.0222         | 1.66e-07        | 0.0054                | 43.5      | 0.1698                     | ++                                                                      | TD,LIFE,ATHOB                 | EPIC               |
| cg16644477 | 1          | 8202028         | OpenSea            |                                    | 176          | -0.1015          | 0.0196         | 2.40e-07        | 0.0075                | 56.0      | 0.1025                     | ++                                                                      | TD,LIFE,ATHOB                 | EPIC               |
| cg07341220 | 16         | 1583899         | Island             | IFT140;TMEM204                     | 268          | -0.3613          | 0.0700         | 2.54e-07        | 0.0077                | 34.7      | 0.1897                     | ++++                                                                    | INMA,TD,LIFE,ATHOB,NFBC       | 450K/EPIC          |
| cg27393390 | 17         | 37351189        | N_Shelf            | CACNB1                             | 176          | 0.0860           | 0.0167         | 2.84e-07        | 0.0082                | 37.9      | 0.1995                     | +++                                                                     | TD,LIFE,ATHOB                 | EPIC               |
| cg00913954 | 1          | 36852956        | S_Shore            | STK40                              | 210          | 0.1631           | 0.0318         | 2.99e-07        | 0.0083                | 63.7      | 0.0634                     | ++                                                                      | INMA,NFBC,RAINE               | 450K               |
| cg13465890 | 3          | 170372073       | Island             |                                    | 386          | -0.0437          | 0.0086         | 3.79e-07        | 0.0094                | 0         | 0.4871                     | ++++                                                                    | INMA,TD,LIFE,ATHOB,NFBC,RAINE | 450K/EPIC          |
| cg19655128 | 17         | 48227965        | Island             | PPP1R9B                            | 386          | 0.1408           | 0.0277         | 3.68e-07        | 0.0094                | 70.0      | 0.0051                     | +++                                                                     | INMA,TD,LIFE,ATHOB,NFBC,RAINE | 450K/EPIC          |
| cg23264059 | 13         | 114840743       | N_Shore            | RASA3                              | 386          | -0.0352          | 0.0069         | 3.52e-07        | 0.0094                | 84.8      | 3.66e-06                   | +++                                                                     | INMA,TD,LIFE,ATHOB,NFBC,RAINE | 450K/EPIC          |
| cg01245155 | 2          | 205919517       | OpenSea            | PARD3B                             | 385          | 0.1469           | 0.0293         | 5.77e-07        | 0.0111                | 70.9      | 0.0040                     | ++++                                                                    | INMA,TD,LIFE,ATHOB,NFBC,RAINE | 450K/EPIC          |
| cg02969380 | 8          | 6691018         | N_Shore            | XKR5                               | 386          | 0.1157           | 0.0231         | 5.62e-07        | 0.0111                | 17.4      | 0.3008                     | ++++                                                                    | INMA,TD,LIFE,ATHOB,NFBC,RAINE | 450K/EPIC          |
| cg06307169 | 17         | 38296698        | OpenSea            | CASC3                              | 384          | 0.0549           | 0.0109         | 5.50e-07        | 0.0111                | 90.6      | 2.72e-10                   | +++                                                                     | INMA,TD,LIFE,ATHOB,NFBC,RAINE | 450K/EPIC          |
| cg08657492 | 7          | 27170832        | S_Shore            | HOXA4                              | 386          | -0.3903          | 0.0775         | 4.80e-07        | 0.0111                | 35.6      | 0.1696                     | +++                                                                     | INMA,TD,LIFE,ATHOB,NFBC,RAINE | 450K/EPIC          |
| cg09854726 | 11         | 64007569        | N_Shore            | FKBP2                              | 386          | 0.1301           | 0.0260         | 5.84e-07        | 0.0111                | 0         | 0.5159                     | ++++                                                                    | INMA,TD,LIFE,ATHOB,NFBC,RAINE | 450K/EPIC          |
| cg15892776 | 16         | 2564749         | Island             | TBC1D24                            | 176          | -0.1015          | 0.0203         | 5.91e-07        | 0.0111                | 0         | 0.9011                     | ---                                                                     | TD,LIFE,ATHOB                 | EPIC               |
| cg20885621 | 1          | 219546629       | OpenSea            |                                    | 176          | 0.1096           | 0.0217         | 4.77e-07        | 0.0111                | 47.5      | 0.1488                     | ++                                                                      | TD,LIFE,ATHOB                 | EPIC               |
| cg21788902 | 8          | 48641185        | OpenSea            | SPIDR                              | 176          | 0.0893           | 0.0177         | 5.20e-07        | 0.0111                | 81.7      | 0.0041                     | ++                                                                      | TD,LIFE,ATHOB                 | EPIC               |
| cg24298476 | 6          | 32729808        | Island             | HLA-DQB2                           | 206          | -0.0337          | 0.0067         | 4.96e-07        | 0.0111                | 85.8      | 0.0008                     | ++                                                                      | INMA,NFBC,RAINE               | 450K               |
| cg08036104 | 22         | 31257590        | OpenSea            | OSBP2                              | 176          | 0.1141           | 0.0229         | 6.37e-07        | 0.0116                | 75.8      | 0.0159                     | ++                                                                      | TD,LIFE,ATHOB                 | EPIC               |
| cg21463140 | 4          | 47913142        | N_Shelf            | NFXL1                              | 208          | -0.2461          | 0.0494         | 6.61e-07        | 0.0117                | 89.8      | 5.17e-05                   | ++                                                                      | INMA,NFBC,RAINE               | 450K               |
| cg07196761 | 11         | 73586776        | N_Shore            | CHCHD8;PAAF1                       | 386          | 0.0443           | 0.0089         | 8.02e-07        | 0.0136                | 89.4      | 4.49e-09                   | +++                                                                     | INMA,TD,LIFE,ATHOB,NFBC,RAINE | 450K/EPIC          |
| cg11893951 | 5          | 141061521       | OpenSea            | ARAP3                              | 386          | -0.2000          | 0.0405         | 7.95e-07        | 0.0136                | 65.6      | 0.0125                     | ++++                                                                    | INMA,TD,LIFE,ATHOB,NFBC,RAINE | 450K/EPIC          |
| cg08271400 | 10         | 94347773        | N_Shelf            |                                    | 386          | -0.0387          | 0.0078         | 8.43e-07        | 0.0139                | 55.9      | 0.0448                     | +++                                                                     | INMA,TD,LIFE,ATHOB,NFBC,RAINE | 450K/EPIC          |
| cg16563171 | 2          | 223156106       | Island             | PAX3                               | 386          | -0.0834          | 0.0170         | 9.74e-07        | 0.0154                | 76.0      | 0.0008                     | ++++                                                                    | INMA,TD,LIFE,ATHOB,NFBC,RAINE | 450K/EPIC          |
| cg17457637 | 7          | 27170717        | S_Shore            | HOXA4                              | 386          | -0.3149          | 0.0642         | 9.54e-07        | 0.0154                | 26.5      | 0.2351                     | +++                                                                     | INMA,TD,LIFE,ATHOB,NFBC,RAINE | 450K/EPIC          |
| cg01458659 | 9          | 124338527       | OpenSea            | DAB2IP                             | 176          | 0.1812           | 0.0373         | 1.23e-06        | 0.0176                | 69.3      | 0.0382                     | +++                                                                     | TD,LIFE,ATHOB                 | EPIC               |
| cg03360656 | 13         | 78774498        | OpenSea            | RNF219-A51                         | 176          | 0.3001           | 0.0622         | 1.45e-06        | 0.0176                | 69.2      | 0.0386                     | +++                                                                     | TD,LIFE,ATHOB                 | EPIC               |
| cg04434994 | 6          | 36305071        | OpenSea            | C6orf222                           | 336          | -0.0756          | 0.0155         | 1.16e-06        | 0.0176                | 22.2      | 0.2729                     | ++                                                                      | INMA,LIFE,ATHOB,NFBC,RAINE    | 450K/EPIC          |
| cg07138414 | 17         | 80397447        | Island             | HEXDC                              | 176          | -0.0846          | 0.0174         | 1.27e-06        | 0.0176                | 71.5      | 0.0297                     | ---                                                                     | TD,LIFE,ATHOB                 | EPIC               |
| cg09369190 | 11         | 57957820        | OpenSea            | OR9Q2                              | 386          | 0.0810           | 0.0168         | 1.47e-06        | 0.0176                | 0         | 0.9462                     | ++++                                                                    | INMA,TD,LIFE,ATHOB,NFBC,RAINE | 450K/EPIC          |
| cg10257671 | 14         | 92629962        | OpenSea            | CP5F2                              | 386          | -0.1649          | 0.0342         | 1.45e-06        | 0.0176                | 9.34      | 0.3562                     | ++++                                                                    | INMA,TD,LIFE,ATHOB,NFBC,RAINE | 450K/EPIC          |
| cg12832565 | 1          | 145715672       | S_Shore            | CD160                              | 386          | 0.1104           | 0.0228         | 1.29e-06        | 0.0176                | 70.9      | 0.0041                     | +++                                                                     | INMA,TD,LIFE,ATHOB,NFBC,RAINE | 450K/EPIC          |
| cg14197205 | 17         | 28256862        | Island             | EFCAB5;SSH2                        | 207          | 0.0482           | 0.0099         | 1.36e-06        | 0.0176                | 47.2      | 0.1501                     | +++                                                                     | INMA,NFBC,RAINE               | 450K               |
| cg15645685 | 19         | 19730175        | S_Shore            | PBX4                               | 386          | -0.1373          | 0.0283         | 1.23e-06        | 0.0176                | 0         | 0.9795                     | ++++                                                                    | INMA,TD,LIFE,ATHOB,NFBC,RAINE | 450K/EPIC          |
| cg19255886 | 8          | 134256852       | OpenSea            | NDRG1                              | 176          | 0.2013           | 0.0418         | 1.49e-06        | 0.0176                | 89.9      | 4.73e-05                   | ++                                                                      | TD,LIFE,ATHOB                 | EPIC               |
| cg25074751 | 2          | 173601133       | S_Shore            | RAPGEF4;LOC91149                   | 386          | 0.0518           | 0.0107         | 1.36e-06        | 0.0176                | 48.2      | 0.0851                     | ++++                                                                    | INMA,TD,LIFE,ATHOB,NFBC,RAINE | 450K/EPIC          |
| cg25687360 | 6          | 170040141       | OpenSea            | WDR27                              | 386          | 0.0492           | 0.0102         | 1.41e-06        | 0.0176                | 80.7      | 8.96e-05                   | ++++                                                                    | INMA,TD,LIFE,ATHOB,NFBC,RAINE | 450K/EPIC          |
| cg25934824 | 6          | 46866729        | OpenSea            | GPR116                             | 386          | 0.0863           | 0.0179         | 1.49e-06        | 0.0176                | 67.4      | 0.0088                     | ++++                                                                    | INMA,TD,LIFE,ATHOB,NFBC,RAINE | 450K/EPIC          |
| cg26107055 | 5          | 125695687       | OpenSea            | GRAMD3                             | 386          | -0.0365          | 0.0075         | 1.31e-06        | 0.0176                | 0         | 0.6442                     | ++                                                                      | INMA,TD,LIFE,ATHOB,NFBC,RAINE | 450K/EPIC          |
| cg27367526 | 7          | 89841692        | S_Shore            | STEAP2                             | 386          | 0.2191           | 0.0451         | 1.18e-06        | 0.0176                | 52.8      | 0.0599                     | ++++                                                                    | INMA,TD,LIFE,ATHOB,NFBC,RAINE | 450K/EPIC          |
| cg02054431 | 6          | 31589593        | S_Shore            | SNORA38;BAT2                       | 210          | 0.1840           | 0.0384         | 1.74e-06        | 0.0202                | 44.9      | 0.1623                     | +++                                                                     | INMA,NFBC,RAINE               | 450K               |
| cg23889772 | 19         | 10077324        | Island             | COL5A3                             | 386          | -0.1412          | 0.0296         | 1.83e-06        | 0.0209                | 67.4      | 0.0089                     | +++                                                                     | INMA,TD,LIFE,ATHOB,NFBC,RAINE | 450K/EPIC          |
| cg06950346 | 7          | 123978181       | OpenSea            |                                    | 386          | 0.1776           | 0.0373         | 1.93e-06        | 0.0209                | 79.8      | 0.0002                     | ++++                                                                    | INMA,TD,LIFE,ATHOB,NFBC,RAINE | 450K/EPIC          |
| cg15777599 | 19         | 15278068        | N_Shelf            | NOTCH3                             | 176          | -0.0358          | 0.0075         | 1.87e-06        | 0.0209                | 0         | 0.6251                     | ---                                                                     | TD,LIFE,ATHOB                 | EPIC               |
| cg23120601 | 15         | 40583227        | Island             | PLCB2                              | 383          | -0.0569          | 0.0119         | 1.96e-06        | 0.0209                | 63.5      | 0.0175                     | +++                                                                     | INMA,TD,LIFE,ATHOB,NFBC,RAINE | 450K/EPIC          |
| cg24225492 | 10         | 73272256        | OpenSea            | LOC102723377;CDH23                 | 176          | 0.0877           | 0.0184         | 1.94e-06        | 0.0209                | 0         | 0.5853                     | +++                                                                     | TD,LIFE,ATHOB                 | EPIC               |
| cg27421105 | 19         | 8477708         | N_Shore            | MARCH2                             | 386          | -0.1777          | 0.0373         | 1.98e-06        | 0.0209                | 12.4      | 0.3356                     | ----                                                                    | INMA,TD,LIFE,ATHOB,NFBC,RAINE | 450K/EPIC          |
| cg04987950 | 20         | 57717562        | OpenSea            |                                    | 176          | -0.0546          | 0.0115         | 2.25e-06        | 0.0229                | 52.9      | 0.1192                     | ++                                                                      | TD,LIFE,ATHOB                 | EPIC               |
| cg08529295 | 1          | 245132782       | N_Shore            | EFCAB2                             | 340          | -0.1716          | 0.0362         | 2.27e-06        | 0.0229                | 88.2      | 6.82e-07                   | +++                                                                     | TD,LIFE,ATHOB,NFBC,RAINE      | 450K/EPIC          |
| cg19157956 | 1          | 42934975        | OpenSea            | PPCS                               | 176          | -0.0533          | 0.0112         | 2.27e-06        | 0.0229                | 83.3      | 0.0024                     | ++                                                                      | TD,LIFE,ATHOB                 | EPIC               |

|            |    |           |         |                      |     |         |        |          |        |      |          |       |                               |           |
|------------|----|-----------|---------|----------------------|-----|---------|--------|----------|--------|------|----------|-------|-------------------------------|-----------|
| cg24378421 | 8  | 11141365  | N_Shore | MTMR9                | 386 | -0.1574 | 0.0334 | 2.43e-06 | 0.0242 | 40.9 | 0.1319   | ----- | INMA,TD,LIFE,ATHOB,NFBC,RAINE | 450K/EPIC |
| cg05413285 | 2  | 151537993 | OpenSea |                      | 386 | 0.1374  | 0.0291 | 2.49e-06 | 0.0244 | 60.8 | 0.0254   | +++++ | INMA,TD,LIFE,ATHOB,NFBC,RAINE | 450K/EPIC |
| cg12625126 | 6  | 11806691  | OpenSea |                      | 176 | -0.2999 | 0.0638 | 2.61e-06 | 0.0248 | 89.0 | 0.0001   | ---   | TD,LIFE,ATHOB                 | EPIC      |
| cg25496104 | 12 | 16190004  | OpenSea | DERA                 | 385 | -0.1016 | 0.0216 | 2.59e-06 | 0.0248 | 0    | 0.7447   | ----- | INMA,TD,LIFE,ATHOB,NFBC,RAINE | 450K/EPIC |
| cg10402715 | 10 | 44189889  | S_Shelf |                      | 386 | 0.0921  | 0.0197 | 2.89e-06 | 0.0271 | 70.1 | 0.0049   | +++++ | INMA,TD,LIFE,ATHOB,NFBC,RAINE | 450K/EPIC |
| cg02461739 | 17 | 72860448  | S_Shelf | FDXR                 | 385 | -0.0345 | 0.0074 | 3.14e-06 | 0.0292 | 0    | 0.5952   | ----- | INMA,TD,LIFE,ATHOB,NFBC,RAINE | 450K/EPIC |
| cg23239239 | 13 | 36729790  | S_Shore |                      | 383 | -0.0671 | 0.0144 | 3.25e-06 | 0.0297 | 31.6 | 0.1983   | ----- | INMA,TD,LIFE,ATHOB,NFBC,RAINE | 450K/EPIC |
| cg03432618 | 22 | 19704196  | N_Shore | SEPT5                | 386 | 0.0719  | 0.0154 | 3.44e-06 | 0.0307 | 0    | 0.8096   | +++++ | INMA,TD,LIFE,ATHOB,NFBC,RAINE | 450K/EPIC |
| cg27386718 | 15 | 93854748  | OpenSea |                      | 176 | 0.1283  | 0.0276 | 3.45e-06 | 0.0307 | 23.1 | 0.2722   | ++-   | TD,LIFE,ATHOB                 | EPIC      |
| cg16655805 | 6  | 74020122  | S_Shore | C6orf147             | 384 | 0.0682  | 0.0147 | 3.55e-06 | 0.0313 | 20.3 | 0.2803   | +++++ | INMA,TD,LIFE,ATHOB,NFBC,RAINE | 450K/EPIC |
| cg10304160 | 10 | 95457300  | OpenSea | FRA10AC1             | 174 | 0.0911  | 0.0196 | 3.68e-06 | 0.0320 | 64.1 | 0.0613   | ++-   | TD,LIFE,ATHOB                 | EPIC      |
| cg00850068 | 19 | 8428494   | N_Shore | ANGPTL4              | 386 | -0.0670 | 0.0145 | 4.12e-06 | 0.0328 | 74.8 | 0.0013   | ----- | INMA,TD,LIFE,ATHOB,NFBC,RAINE | 450K/EPIC |
| cg04125341 | 3  | 139656251 | S_Shore | CLSTN2               | 386 | -0.2337 | 0.0507 | 4.15e-06 | 0.0328 | 23.8 | 0.2550   | ----- | INMA,TD,LIFE,ATHOB,NFBC,RAINE | 450K/EPIC |
| cg06453421 | 10 | 30832152  | OpenSea |                      | 176 | 0.1828  | 0.0396 | 4.05e-06 | 0.0328 | 80.2 | 0.0063   | +++   | TD,LIFE,ATHOB                 | EPIC      |
| cg15735129 | 2  | 182850269 | OpenSea | PPP1R1C              | 209 | 0.1637  | 0.0355 | 4.01e-06 | 0.0328 | 13.4 | 0.3150   | +++   | INMA,NFBC,RAINE               | 450K      |
| cg20775162 | 11 | 8248503   | OpenSea | LMO1                 | 209 | 0.1932  | 0.0419 | 3.98e-06 | 0.0328 | 76.4 | 0.0143   | +++   | INMA,NFBC,RAINE               | 450K      |
| cg21420674 | 1  | 2713926   | N_Shelf |                      | 386 | -0.1461 | 0.0316 | 3.99e-06 | 0.0328 | 87.1 | 2.60e-07 | ----- | INMA,TD,LIFE,ATHOB,NFBC,RAINE | 450K/EPIC |
| cg25222252 | 11 | 9595204   | Island  | WEE1                 | 385 | 0.0397  | 0.0086 | 4.12e-06 | 0.0328 | 14.8 | 0.3187   | +++++ | INMA,TD,LIFE,ATHOB,NFBC,RAINE | 450K/EPIC |
| cg25852019 | 2  | 220309638 | Island  | SPEG                 | 385 | -0.0683 | 0.0148 | 4.00e-06 | 0.0328 | 42.9 | 0.1186   | ++-   | INMA,TD,LIFE,ATHOB,NFBC,RAINE | 450K/EPIC |
| cg15432367 | 17 | 38974887  | OpenSea | KRT10;TMEM99         | 386 | 0.1350  | 0.0293 | 4.30e-06 | 0.0336 | 64.7 | 0.0144   | ----- | INMA,TD,LIFE,ATHOB,NFBC,RAINE | 450K/EPIC |
| cg01790002 | 7  | 27283545  | Island  | EVX1                 | 386 | -0.0676 | 0.0147 | 4.37e-06 | 0.0338 | 0    | 0.5382   | ----- | INMA,TD,LIFE,ATHOB,NFBC,RAINE | 450K/EPIC |
| cg08262002 | 4  | 16575323  | OpenSea | LDB2                 | 386 | 0.1736  | 0.0379 | 4.66e-06 | 0.0356 | 70.3 | 0.0047   | +++++ | INMA,TD,LIFE,ATHOB,NFBC,RAINE | 450K/EPIC |
| cg10636896 | 1  | 199947580 | OpenSea |                      | 384 | 0.0840  | 0.0183 | 4.91e-06 | 0.0364 | 66.9 | 0.0097   | ++-   | INMA,TD,LIFE,ATHOB,NFBC,RAINE | 450K/EPIC |
| cg10807894 | 12 | 125169804 | OpenSea |                      | 386 | 0.2030  | 0.0444 | 4.89e-06 | 0.0364 | 15.1 | 0.3164   | +++++ | INMA,TD,LIFE,ATHOB,NFBC,RAINE | 450K/EPIC |
| cg25446789 | 2  | 25810393  | OpenSea | DTNB                 | 386 | 0.1918  | 0.0419 | 4.81e-06 | 0.0364 | 82.1 | 3.49e-05 | +++++ | INMA,TD,LIFE,ATHOB,NFBC,RAINE | 450K/EPIC |
| cg04057642 | 17 | 45730222  | S_Shelf | KPNB1                | 386 | -0.2253 | 0.0494 | 5.15e-06 | 0.0375 | 54.5 | 0.0511   | ----- | INMA,TD,LIFE,ATHOB,NFBC,RAINE | 450K/EPIC |
| cg14228029 | 4  | 1495907   | S_Shore |                      | 386 | -0.1667 | 0.0366 | 5.17e-06 | 0.0375 | 84.4 | 5.37e-06 | ++-   | INMA,TD,LIFE,ATHOB,NFBC,RAINE | 450K/EPIC |
| cg15415571 | 2  | 113805619 | N_Shelf | IL368                | 176 | 0.1064  | 0.0233 | 5.29e-06 | 0.0379 | 46.1 | 0.1562   | ++-   | TD,LIFE,ATHOB                 | EPIC      |
| cg03116409 | 12 | 66042554  | OpenSea |                      | 386 | -0.0379 | 0.0083 | 5.42e-06 | 0.0384 | 0    | 0.6892   | ----- | INMA,TD,LIFE,ATHOB,NFBC,RAINE | 450K/EPIC |
| cg20319484 | 7  | 132333585 | OpenSea | PLXNA4               | 385 | -0.0730 | 0.0160 | 5.46e-06 | 0.0384 | 40.0 | 0.1384   | ----- | INMA,TD,LIFE,ATHOB,NFBC,RAINE | 450K/EPIC |
| cg01911077 | 11 | 64531743  | N_Shore |                      | 210 | 0.1595  | 0.0352 | 5.89e-06 | 0.0394 | 78.7 | 0.0089   | ++-   | INMA,NFBC,RAINE               | 450K      |
| cg02479816 | 19 | 9273931   | S_Shelf | ZNF317               | 386 | 0.0738  | 0.0162 | 5.85e-06 | 0.0394 | 76.3 | 0.0007   | +++++ | INMA,TD,LIFE,ATHOB,NFBC,RAINE | 450K/EPIC |
| cg03954353 | 17 | 43715162  | OpenSea | C17orf69;MGC57346    | 386 | 0.1111  | 0.0245 | 5.88e-06 | 0.0394 | 54.8 | 0.0501   | +++++ | INMA,TD,LIFE,ATHOB,NFBC,RAINE | 450K/EPIC |
| cg15449979 | 20 | 10157028  | S_Shelf |                      | 386 | 0.1166  | 0.0257 | 5.95e-06 | 0.0394 | 22.2 | 0.2663   | +++++ | INMA,TD,LIFE,ATHOB,NFBC,RAINE | 450K/EPIC |
| cg21248089 | 6  | 138056102 | OpenSea | LOC100507406         | 176 | 0.2139  | 0.0472 | 5.82e-06 | 0.0394 | 56.7 | 0.0989   | ++-   | TD,LIFE,ATHOB                 | EPIC      |
| cg23811160 | 13 | 27164059  | OpenSea | WASF3                | 176 | 0.2226  | 0.0490 | 5.72e-06 | 0.0394 | 91.7 | 5.38e-06 | ++-   | TD,LIFE,ATHOB                 | EPIC      |
| cg03639429 | 7  | 55070311  | N_Shore |                      | 386 | 0.1389  | 0.0308 | 6.45e-06 | 0.0401 | 0    | 0.8438   | +++++ | INMA,TD,LIFE,ATHOB,NFBC,RAINE | 450K/EPIC |
| cg06289282 | 13 | 110523577 | S_Shore |                      | 176 | 0.0606  | 0.0134 | 6.12e-06 | 0.0401 | 30.7 | 0.2361   | ++-   | TD,LIFE,ATHOB                 | EPIC      |
| cg08128087 | 1  | 33593457  | S_Shore |                      | 385 | 0.1123  | 0.0248 | 6.29e-06 | 0.0401 | 36.3 | 0.1642   | ----- | INMA,TD,LIFE,ATHOB,NFBC,RAINE | 450K/EPIC |
| cg12055844 | 16 | 69149669  | OpenSea | HAS3                 | 176 | 0.0524  | 0.0115 | 6.18e-06 | 0.0401 | 0    | 0.7754   | +++   | TD,LIFE,ATHOB                 | EPIC      |
| cg16096180 | 8  | 119485582 | OpenSea | SAMD12               | 176 | 0.2483  | 0.0550 | 6.42e-06 | 0.0401 | 0    | 0.9313   | +++   | TD,LIFE,ATHOB                 | EPIC      |
| cg18079823 | 11 | 36614820  | OpenSea | RAG2;C11orf74        | 176 | 0.2121  | 0.0470 | 6.52e-06 | 0.0401 | 82.0 | 0.0037   | ++-   | TD,LIFE,ATHOB                 | EPIC      |
| cg21339736 | 19 | 51974694  | OpenSea |                      | 176 | 0.0870  | 0.0193 | 6.51e-06 | 0.0401 | 62.4 | 0.0698   | ++-   | TD,LIFE,ATHOB                 | EPIC      |
| cg26502715 | 2  | 187529796 | OpenSea | ITGAV                | 176 | 0.1221  | 0.0270 | 6.38e-06 | 0.0401 | 88.2 | 0.0001   | ++-   | TD,LIFE,ATHOB                 | EPIC      |
| cg08954776 | 5  | 19928399  | OpenSea | CDH18                | 385 | 0.0893  | 0.0198 | 6.79e-06 | 0.0414 | 58.1 | 0.0353   | +++++ | INMA,TD,LIFE,ATHOB,NFBC,RAINE | 450K/EPIC |
| cg10138206 | 12 | 105346780 | OpenSea |                      | 176 | -0.1415 | 0.0314 | 6.96e-06 | 0.0417 | 38.8 | 0.1947   | ++-   | TD,LIFE,ATHOB                 | EPIC      |
| cg22097891 | 4  | 4405946   | OpenSea | D4S234E              | 386 | 0.1019  | 0.0226 | 6.95e-06 | 0.0417 | 0    | 0.8235   | +++++ | INMA,TD,LIFE,ATHOB,NFBC,RAINE | 450K/EPIC |
| cg04891843 | 19 | 45866465  | N_Shore | ERCC2                | 176 | 0.0491  | 0.0109 | 7.11e-06 | 0.0419 | 43.5 | 0.1701   | +++   | TD,LIFE,ATHOB                 | EPIC      |
| cg08160970 | 19 | 54180782  | OpenSea | MIR515-2;MIR515-1    | 386 | 0.0755  | 0.0168 | 7.06e-06 | 0.0419 | 72.6 | 0.0026   | +++++ | INMA,TD,LIFE,ATHOB,NFBC,RAINE | 450K/EPIC |
| cg03077077 | 4  | 122685352 | N_Shore | TMEM155;LOC100192379 | 340 | -0.2364 | 0.0527 | 7.42e-06 | 0.0427 | 18.8 | 0.2945   | ++-   | TD,LIFE,ATHOB,NFBC,RAINE      | 450K/EPIC |
| cg05859578 | 18 | 77272585  | Island  | NFATC1               | 386 | -0.0619 | 0.0138 | 7.44e-06 | 0.0427 | 77.7 | 0.0004   | ----- | INMA,TD,LIFE,ATHOB,NFBC,RAINE | 450K/EPIC |
| cg14431001 | 10 | 101088533 | N_Shore | CNNM1                | 386 | -0.1130 | 0.0252 | 7.38e-06 | 0.0427 | 57.0 | 0.0399   | ++-   | INMA,TD,LIFE,ATHOB,NFBC,RAINE | 450K/EPIC |
| cg08380316 | 7  | 158383324 | S_Shelf | MIR5707              | 176 | -0.3844 | 0.0859 | 7.65e-06 | 0.0436 | 74.7 | 0.0189   | ++-   | TD,LIFE,ATHOB                 | EPIC      |
| cg02483204 | 12 | 116893985 | OpenSea |                      | 386 | -0.2247 | 0.0502 | 7.78e-06 | 0.0436 | 6.71 | 0.3735   | ----- | INMA,TD,LIFE,ATHOB,NFBC,RAINE | 450K/EPIC |
| cg26132518 | 17 | 19482069  | N_Shore | SLC47A1              | 176 | -0.1640 | 0.0366 | 7.77e-06 | 0.0436 | 0    | 0.4433   | ++-   | TD,LIFE,ATHOB                 | EPIC      |
| cg06357940 | 3  | 58416685  | N_Shelf | PDHB                 | 386 | 0.0555  | 0.0124 | 8.06e-06 | 0.0448 | 85.7 | 1.42e-06 | +++++ | INMA,TD,LIFE,ATHOB,NFBC,RAINE | 450K/EPIC |
| cg07777964 | 9  | 37666803  | OpenSea | FRMPD1               | 176 | 0.0714  | 0.0160 | 8.23e-06 | 0.0454 | 77.8 | 0.0109   | ++-   | TD,LIFE,ATHOB                 | EPIC      |
| cg08158042 | 2  | 172813595 | OpenSea | HAT1                 | 176 | 0.1079  | 0.0242 | 8.35e-06 | 0.0457 | 86.2 | 0.0006   | ++-   | TD,LIFE,ATHOB                 | EPIC      |
| cg22110973 | 15 | 91499626  | N_Shore | RCCD1;RCCD1          | 386 | -0.2005 | 0.0451 | 8.80e-06 | 0.0478 | 67.4 | 0.0088   | ----- | INMA,TD,LIFE,ATHOB,NFBC,RAINE | 450K/EPIC |
| cg01140247 | 10 | 77784369  | OpenSea | C10orf11             | 386 | 0.1460  | 0.0328 | 8.96e-06 | 0.0480 | 39.7 | 0.1404   | +++++ | INMA,TD,LIFE,ATHOB,NFBC,RAINE | 450K/EPIC |
| cg01566217 | 1  | 208084255 | Island  | CD34                 | 386 | 0.0367  | 0.0082 | 8.98e-06 | 0.0480 | 32.9 | 0.1886   | +++++ | INMA,TD,LIFE,ATHOB,NFBC,RAINE | 450K/EPIC |
| cg13117164 | 4  | 54960232  | S_Shore |                      | 384 | -0.0542 | 0.0112 | 9.24e-06 | 0.0490 | 29.8 | 0.2109   | ----- | INMA,TD,LIFE,ATHOB,NFBC,RAINE | 450K/EPIC |
| cg06510234 | 10 | 5554040   | N_Shore |                      | 386 | -0.0521 | 0.0127 | 9.51e-06 | 0.0498 | 57.2 | 0.0390   | ++-   | INMA,TD,LIFE,ATHOB,NFBC,RAINE | 450K/EPIC |
| cg16645453 | 14 | 65492838  | OpenSea | FNTB;CHURC1-FNTB;MAX | 176 | 0.0297  | 0.0067 | 9.52e-06 | 0.0498 | 16.5 | 0.3015   | +++   | TD,LIFE,ATHOB                 | EPIC      |
| cg05235903 | 1  | 35686341  | OpenSea |                      | 176 | -0.0393 | 0.0089 | 9.64e-06 | 0.0499 | 0    | 0.7212   | ---   | TD,LIFE,ATHOB                 | EPIC      |
| cg24652379 | 7  | 141477912 | OpenSea | TAS2R4               | 386 | -0.0416 | 0.0094 | 9.68e-06 | 0.0499 | 65.6 | 0.0125   | ++-   | INMA,TD,LIFE,ATHOB,NFBC,RAINE | 450K/EPIC |
| cg20885078 | 2  | 179278530 | Island  | MIR548N              | 386 | 0.0235  | 0.0053 | 9.76e-06 | 0.0499 | 38.0 | 0.1522   | +++++ | INMA,TD,LIFE,ATHOB,NFBC,RAINE | 450K/EPIC |

**Table S8. Meta-analysis results of associations between dietary glycemic load and blood DNA methylation (participants with normal-weight, FDR <0.05)**

\*Cohort abbreviations: ATHOB: ATHEROBESITY, LIFE: LIFE Child, TD: TEENDIAB, RAINE: Raine Study Gen2, NFBC: NFBC1986

| CpG        | Chromosome | Position (hg19) | Relation to Island | Nearest Gene (Illumina annotation) | Total number | Beta coefficient | Standard error | nominal P-value | FDR-corrected P-value | I-squared | Heterogeneity test P-value | Direction of effect in each cohort (order as listed in Cohort included) | Cohort included*  | Probe availability |
|------------|------------|-----------------|--------------------|------------------------------------|--------------|------------------|----------------|-----------------|-----------------------|-----------|----------------------------|-------------------------------------------------------------------------|-------------------|--------------------|
| cg01791229 | 3          | 23156165        | OpenSea            |                                    | 170          | -0.0597          | 0.0089         | 2.66e-11        | 1.82e-05              | 96.3      | 1.93e-07                   | --                                                                      | TD,LIFE           | EPIC               |
| cg20095985 | 8          | 10984074        | OpenSea            | XKR6                               | 170          | -0.0037          | 0.0006         | 2.15e-09        | 0.0007                | 0         | 0.7312                     | --                                                                      | TD,LIFE           | EPIC               |
| cg05041307 | 17         | 70025639        | OpenSea            | LINC01152                          | 170          | -0.0221          | 0.0039         | 2.01e-08        | 0.0046                | 80.0      | 0.0251                     | --                                                                      | TD,LIFE           | EPIC               |
| cg09243533 | 1          | 19281949        | Island             | IFFO2                              | 481          | 0.0042           | 0.0007         | 9.04e-08        | 0.0155                | 28.2      | 0.2427                     | +++                                                                     | INMA,TD,LIFE,NFBC | 450K/EPIC          |
| cg05855306 | 3          | 119107484       | OpenSea            | ARHGAP31                           | 170          | 0.0101           | 0.0019         | 1.29e-07        | 0.0168                | 61.3      | 0.1078                     | +                                                                       | TD,LIFE           | EPIC               |
| cg22138408 | 16         | 85539811        | OpenSea            |                                    | 170          | -0.0373          | 0.0071         | 1.47e-07        | 0.0168                | 94.8      | 1.08e-05                   | --                                                                      | TD,LIFE           | EPIC               |
| cg12732334 | 1          | 21501370        | N_Shore            | EIF4G3                             | 170          | -0.0731          | 0.0143         | 3.28e-07        | 0.0225                | 84.4      | 0.0112                     | +-                                                                      | TD,LIFE           | EPIC               |
| cg13011069 | 1          | 247001585       | OpenSea            |                                    | 170          | 0.0078           | 0.0015         | 3.19e-07        | 0.0225                | 0         | 0.4725                     | ++                                                                      | TD,LIFE           | EPIC               |
| cg20965602 | 19         | 29993879        | OpenSea            | LOC284395                          | 170          | -0.0201          | 0.0039         | 2.92e-07        | 0.0225                | 0         | 0.8010                     | --                                                                      | TD,LIFE           | EPIC               |
| cg25800356 | 12         | 132606003       | S_Shelf            | EP400NL                            | 477          | 0.0043           | 0.0008         | 2.51e-07        | 0.0225                | 0         | 0.6484                     | +++                                                                     | INMA,TD,LIFE,NFBC | 450K/EPIC          |
| cg11120516 | 15         | 85166096        | OpenSea            | ZSCAN2                             | 170          | 0.0027           | 0.0005         | 4.62e-07        | 0.0275                | 50.4      | 0.1554                     | +-                                                                      | TD,LIFE           | EPIC               |
| cg25882643 | 15         | 48441588        | OpenSea            | MYEF2                              | 170          | 0.0546           | 0.0108         | 4.81e-07        | 0.0275                | 96.2      | 2.14e-07                   | ++                                                                      | TD,LIFE           | EPIC               |
| cg21666867 | 12         | 2114282         | S_Shore            | DCP1B                              | 170          | -0.0069          | 0.0013         | 5.49e-07        | 0.0290                | 0         | 0.6245                     | --                                                                      | TD,LIFE           | EPIC               |
| cg15282031 | 8          | 8483040         | OpenSea            |                                    | 170          | -0.0746          | 0.0150         | 6.56e-07        | 0.0300                | 0         | 0.6193                     | --                                                                      | TD,LIFE           | EPIC               |
| cg23674806 | 2          | 145444731       | OpenSea            | TEX41                              | 170          | 0.0542           | 0.0109         | 6.48e-07        | 0.0300                | 91.7      | 0.0005                     | ++                                                                      | TD,LIFE           | EPIC               |
| cg17289863 | 6          | 44213050        | N_Shore            | HSP90AB1                           | 170          | -0.0059          | 0.0012         | 9.16e-07        | 0.0392                | 0         | 0.3224                     | +-                                                                      | TD,LIFE           | EPIC               |
| cg08264638 | 2          | 55747775        | S_Shore            | CCDC104                            | 480          | -0.0068          | 0.0014         | 1.15e-06        | 0.0466                | 0         | 0.4845                     | ----                                                                    | INMA,TD,LIFE,NFBC | 450K/EPIC          |



**Table S9. Meta-analysis results of associations between dietary glycemic load and blood DNA methylation (participants with overweight/obesity, FDR <0.05)**

\*Cohort abbreviations: ATOH: ATEROBESTY, LIFE: LIFE Child, TD: TEENDIAB, RAINE: Raine Study Gen2, NFBC: NFBC1986

| CpG        | Chromosome | Position (hg19) | Relation to Island | Nearest Gene (RefSeq annotation) | Total number | Beta coefficient | Standard error | nominal P-value | FDR-corrected P-value | I-squared | Heterogeneity test P-value | Direction of effect in each cohort (order as listed in Cohort included) | Cohort included*  | Probe availability |
|------------|------------|-----------------|--------------------|----------------------------------|--------------|------------------|----------------|-----------------|-----------------------|-----------|----------------------------|-------------------------------------------------------------------------|-------------------|--------------------|
| cg0488968  | 10         | 130508795       | S Shore            |                                  | 93           | 0.0394           | 0.0051         | 1.01e-14        | 6.96e-09              | 0         | 0.4115                     | ++                                                                      | INMA,NFBC         | 450K               |
| cg0728927  | 2          | 231819514       | S Shelf            | SPATA3                           | 93           | 0.0091           | 0.0012         | 2.79e-14        | 9.57e-09              | 86.4      | 0.0066                     | +                                                                       | INMA,NFBC         | 450K               |
| cg18441811 | 11         | 71824068        | S Shore            | CL1orf51                         | 209          | -0.0079          | 0.0011         | 4.91e-13        | 1.12e-07              | 71.7      | 0.0138                     | ---                                                                     | INMA,TG,NFBC,LIFE | 450K/EPIC          |
| cg05474605 | 5          | 40312344        | OpenSea            | SEPR1                            | 209          | 0.0257           | 0.0026         | 2.71e-12        | 4.65e-07              | 64.7      | 0.0363                     | +++                                                                     | INMA,TG,NFBC,LIFE | 450K/EPIC          |
| cg17919116 | 11         | 102836382       | OpenSea            | MMP13                            | 209          | 0.0163           | 0.0024         | 1.05e-11        | 1.45e-06              | 74.9      | 0.0074                     | ++++                                                                    | INMA,TG,NFBC,LIFE | 450K/EPIC          |
| cg05088621 | 12         | 104687620       | Island             | EIO3,TNFRD1                      | 209          | 0.0525           | 0.0079         | 4.62e-11        | 4.53e-06              | 83.8      | 0.0003                     | +++                                                                     | INMA,TG,NFBC,LIFE | 450K/EPIC          |
| cg0723892  | 1          | 233004956       | OpenSea            |                                  | 209          | -0.0248          | 0.0020         | 4.25e-11        | 4.53e-06              | 89.8      | 1.83e-06                   | +++                                                                     | INMA,TG,NFBC,LIFE | 450K/EPIC          |
| cg09050081 | 11         | 83325531        | OpenSea            |                                  | 209          | 0.0118           | 0.0018         | 3.88e-10        | 3.11e-05              | 65.8      | 0.0321                     | +++                                                                     | INMA,TG,NFBC,LIFE | 450K/EPIC          |
| cg20567785 | 12         | 129456496       | OpenSea            | GLT1D1                           | 209          | 0.0551           | 0.0088         | 4.08e-10        | 3.11e-05              | 58.1      | 0.0665                     | +++                                                                     | INMA,TG,NFBC,LIFE | 450K/EPIC          |
| cg13060970 | 2          | 68592349        | OpenSea            | PLEK                             | 209          | 0.0300           | 0.0048         | 5.71e-10        | 3.62e-05              | 80.1      | 0.0017                     | ++++                                                                    | INMA,TG,NFBC,LIFE | 450K/EPIC          |
| cg14341111 | 9          | 138650549       | N Shore            | KCNT1                            | 209          | 0.0365           | 0.0058         | 5.81e-10        | 3.62e-05              | 78.8      | 0.0026                     | ++                                                                      | INMA,TG,NFBC,LIFE | 450K/EPIC          |
| cg19688605 | 15         | 91561309        | OpenSea            | VPS33B                           | 116          | 0.0261           | 0.0042         | 7.24e-10        | 4.14e-05              | 92.9      | 0.0001                     | +                                                                       | TO LIFE           | EPIC               |
| cg07723218 | 17         | 38176064        | OpenSea            | MEI2D4                           | 208          | -0.0193          | 0.0031         | 1.10e-09        | 5.81e-05              | 0         | 0.4642                     | ---                                                                     | INMA,TG,NFBC,LIFE | 450K/EPIC          |
| cg7260684  | 16         | 85061742        | S Shore            | KIAA0513                         | 209          | 0.0195           | 0.0033         | 3.48e-09        | 0.0001                | 55.6      | 0.0798                     | +++                                                                     | INMA,TG,NFBC,LIFE | 450K/EPIC          |
| cg04915668 | 17         | 22184161        | S Shelf            |                                  | 209          | -0.0423          | 0.0070         | 3.99e-09        | 0.0001                | 0         | 0.6222                     | ---                                                                     | INMA,TG,NFBC,LIFE | 450K/EPIC          |
| cg16711864 | 1          | 36935656        | OpenSea            | CSF3R                            | 209          | 0.0051           | 0.0008         | 4.78e-09        | 0.0002                | 87.3      | 3.16e-05                   | ---                                                                     | INMA,TG,NFBC,LIFE | 450K/EPIC          |
| cg18949521 | 6          | 29324300        | OpenSea            | OR0V1                            | 204          | 0.0090           | 0.0015         | 4.99e-09        | 0.0002                | 71.4      | 0.0145                     | +++                                                                     | INMA,TG,NFBC,LIFE | 450K/EPIC          |
| cg21002217 | 17         | 70216183        | OpenSea            |                                  | 209          | 0.0140           | 0.0024         | 7.62e-09        | 0.0002                | 89.1      | 4.07e-06                   | +++                                                                     | INMA,TG,NFBC,LIFE | 450K/EPIC          |
| cg00718883 | 8          | 26493115        | OpenSea            | DRYS2                            | 209          | -0.0056          | 0.0009         | 1.01e-08        | 0.0003                | 71.6      | 0.0143                     | ---                                                                     | INMA,TG,NFBC,LIFE | 450K/EPIC          |
| cg03562501 | 18         | 76556322        | N Shore            |                                  | 116          | -0.0126          | 0.0022         | 1.05e-08        | 0.0003                | 75.3      | 0.0437                     | +                                                                       | TO LIFE           | EPIC               |
| cg11751808 | 6          | 25079723        | OpenSea            |                                  | 206          | 0.0132           | 0.0023         | 9.80e-09        | 0.0001                | 57.2      | 0.0274                     | +++                                                                     | INMA,TG,NFBC,LIFE | 450K/EPIC          |
| cg14607127 | 14         | 86306803        | OpenSea            |                                  | 116          | 0.0113           | 0.0019         | 4.35e-09        | 0                     | 0.5437    | ---                        | TO LIFE                                                                 | EPIC              |                    |
| cg16622906 | 5          | 140529775       | N Shore            | PCDH8                            | 207          | -0.0409          | 0.0071         | 8.56e-09        | 0.0003                | 8.30      | 0.3515                     | ---                                                                     | INMA,TG,NFBC,LIFE | 450K/EPIC          |
| cg19411557 | 3          | 59393503        | OpenSea            |                                  | 209          | 0.0179           | 0.0031         | 1.06e-08        | 0.0003                | 5.00      | 0.3678                     | +++                                                                     | INMA,TG,NFBC,LIFE | 450K/EPIC          |
| cg05949063 | 14         | 93883268        | N Shore            | CCNB3                            | 209          | -0.0124          | 0.0021         | 2.24e-08        | 0.0005                | 77.9      | 0.0378                     | ---                                                                     | INMA,TG,NFBC,LIFE | 450K/EPIC          |
| cg23532339 | 2          | 63813413        | Island             | VAMP5                            | 115          | 0.0495           | 0.0088         | 2.26e-08        | 0.0005                | 0         | 0.3678                     | ++                                                                      | TO LIFE           | EPIC               |
| cg16491865 | 11         | 16181614        | OpenSea            | SOX6                             | 159          | 0.0277           | 0.0049         | 2.61e-08        | 0.0006                | 57.4      | 0.0955                     | ++                                                                      | INMA,NFBC,LIFE    | 450K/EPIC          |
| cg05761971 | 2          | 38177677        | OpenSea            | FAM82A3                          | 208          | 0.0084           | 0.0015         | 2.84e-08        | 0.0006                | 0         | 0.9843                     | +++                                                                     | INMA,TG,NFBC,LIFE | 450K/EPIC          |
| cg18610053 | 6          | 12936649        | Island             | BRD2                             | 91           | 0.0077           | 0.0013         | 2.98e-08        | 0                     | 0.9536    | ---                        | INMA,NFBC                                                               | 450K              |                    |
| cg03080607 | 10         | 82368399        | OpenSea            | SH2D4B                           | 209          | 0.1720           | 0.0013         | 3.85e-08        | 0.0008                | 72.7      | 0.0116                     | ++++                                                                    | INMA,TG,NFBC,LIFE | 450K/EPIC          |
| cg18265311 | 11         | 9263958         | OpenSea            | DENND5A                          | 116          | 0.0085           | 0.0015         | 4.94e-08        | 0.0010                | 55.3      | 0.1344                     | ++                                                                      | TO LIFE           | EPIC               |
| cg09317403 | 14         | 92949496        | OpenSea            | RH3                              | 209          | 0.0055           | 0.0010         | 6.00e-08        | 0.0012                | 41.6      | 0.1620                     | ---                                                                     | INMA,TG,NFBC,LIFE | 450K/EPIC          |
| cg20765459 | 11         | 5265155         | OpenSea            | HBBP1                            | 209          | 0.0133           | 0.0024         | 6.20e-08        | 0.0012                | 67.9      | 0.0250                     | +++                                                                     | INMA,TG,NFBC,LIFE | 450K/EPIC          |
| cg23632178 | 1          | 9865398         | OpenSea            | CLSTN1                           | 116          | 0.0240           | 0.0044         | 6.23e-08        | 0.0012                | 16.9      | 0.2723                     | ++                                                                      | TO LIFE           | EPIC               |
| cg21165673 | 17         | 66339947        | OpenSea            | ARSG                             | 116          | 0.0320           | 0.0059         | 7.28e-08        | 0.0014                | 97.2      | 2.15e-09                   | ++                                                                      | TO LIFE           | EPIC               |
| cg09651580 | 16         | 25511627        | S Shore            |                                  | 209          | 0.0252           | 0.0047         | 7.92e-08        | 0.0009                | 73.5      | 0.0069                     | +++                                                                     | INMA,TG,NFBC,LIFE | 450K/EPIC          |
| cg17270519 | 12         | 132923339       | S Shore            |                                  | 209          | -0.0338          | 0.0063         | 7.80e-08        | 0.0014                | 71.2      | 0.0152                     | ---                                                                     | INMA,TG,NFBC,LIFE | 450K/EPIC          |
| cg02616601 | 11         | 76150487        | Island             | CL1orf30                         | 209          | 0.0077           | 0.0014         | 7.72e-08        | 0.0014                | 80.3      | 0.0015                     | +++                                                                     | INMA,TG,NFBC,LIFE | 450K/EPIC          |
| cg18720125 | 11         | 121884441       | OpenSea            | NTM                              | 116          | -0.0602          | 0.0112         | 8.31e-08        | 0.0014                | 0         | 0.7309                     | ---                                                                     | TO LIFE           | EPIC               |
| cg23586641 | 1          | 108829157       | OpenSea            | MIR181B1                         | 207          | -0.0108          | 0.0019         | 9.67e-08        | 0.0014                | 71.6      | 0.0141                     | ++                                                                      | INMA,TG,NFBC,LIFE | 450K/EPIC          |
| cg14723638 | 1          | 80230196        | OpenSea            | TGFB3                            | 116          | 0.0086           | 0.0016         | 9.62e-08        | 0.0016                | 0         | 0.6285                     | ++                                                                      | TO LIFE           | EPIC               |
| cg2472969  | 15         | 73861914        | OpenSea            | NPTN-IT1,NPTN                    | 116          | -0.0156          | 0.0029         | 1.04e-07        | 0.0017                | 91.6      | 0.0005                     | ---                                                                     | TO LIFE           | EPIC               |
| cg08042312 | 15         | 88156234        | Island             |                                  | 209          | -0.0678          | 0.0127         | 1.07e-07        | 0.0017                | 81.8      | 0.0008                     | ---                                                                     | INMA,TG,NFBC,LIFE | 450K/EPIC          |
| cg01708711 | 7          | 75959031        | Island             | YWHAG                            | 207          | -0.0110          | 0.0020         | 1.12e-07        | 0.0017                | 0         | 0.5308                     | ---                                                                     | INMA,TG,NFBC,LIFE | 450K/EPIC          |
| cg00415993 | 5          | 75919188        | OpenSea            | F2RL2,IGFAP2                     | 209          | 0.0257           | 0.0048         | 1.27e-07        | 0.0017                | 61.5      | 0.0503                     | +++                                                                     | INMA,TG,NFBC,LIFE | 450K/EPIC          |
| cg13848802 | 4          | 144442453       | Island             | SMARCA5                          | 162          | 0.0107           | 0.0020         | 1.23e-07        | 0.0017                | 80.5      | 0.2371                     | ++                                                                      | INMA,TG,NFBC,LIFE | 450K/EPIC          |
| cg14403990 | 7          | 405517866       | OpenSea            |                                  | 209          | -0.0560          | 0.0009         | 1.20e-07        | 0.0017                | 66.1      | 0.0004                     | ---                                                                     | INMA,TG,NFBC,LIFE | 450K/EPIC          |
| cg20926120 | 3          | 58852325        | OpenSea            | C3orf67                          | 207          | 0.0065           | 0.0012         | 1.19e-07        | 0.0017                | 0         | 0.4608                     | +++                                                                     | INMA,TG,NFBC,LIFE | 450K/EPIC          |
| cg26272214 | 1          | 17722588        | OpenSea            | FAM5B                            | 207          | -0.0414          | 0.0078         | 1.26e-07        | 0.0017                | 76.4      | 0.0052                     | ---                                                                     | INMA,TG,NFBC,LIFE | 450K/EPIC          |
| cg05213466 | 5          | 14802529        | OpenSea            | SLC6A3                           | 209          | -0.0102          | 0.0040         | 1.33e-07        | 0.0017                | 61.3      | 0.0509                     | ---                                                                     | INMA,TG,NFBC,LIFE | 450K/EPIC          |
| cg18592561 | 20         | 444081          | Island             | SCR2                             | 209          | -0.0274          | 0.0052         | 1.70e-07        | 0.0022                | 26.1      | 0.2549                     | ---                                                                     | INMA,TG,NFBC,LIFE | 450K/EPIC          |
| cg0125281  | 18         | 41176109        | OpenSea            |                                  | 116          | -0.0156          | 0.0029         | 1.75e-07        | 0.0023                | 0         | 0.6160                     | ---                                                                     | TO LIFE           | EPIC               |
| cg24065451 | 11         | 128415512       | Island             | ETS1                             | 209          | -0.0175          | 0.0033         | 1.81e-07        | 0.0023                | 0         | 0.8360                     | ---                                                                     | INMA,TG,NFBC,LIFE | 450K/EPIC          |
| cg1661009  | 19         | 57441019        | OpenSea            |                                  | 115          | -0.0838          | 0.0161         | 1.95e-07        | 0.0024                | 46.3      | 0.1722                     | ---                                                                     | TO LIFE           | EPIC               |
| cg19388739 | 19         | 3581993         | N Shelf            |                                  | 209          | 0.0287           | 0.0055         | 2.46e-07        | 0.0030                | 49.0      | 0.1174                     | ++++                                                                    | INMA,TG,NFBC,LIFE | 450K/EPIC          |
| cg12787530 | 6          | 136333779       | OpenSea            | PDE7B                            | 209          | 0.0126           | 0.0024         | 2.67e-07        | 0.0032                | 67.7      | 0.0256                     | +++                                                                     | INMA,TG,NFBC,LIFE | 450K/EPIC          |
| cg10899214 | 2          | 234236201       | OpenSea            | SAG                              | 92           | 0.0078           | 0.0015         | 2.74e-07        | 0.0033                | 86.0      | 0.0075                     | +                                                                       | INMA,NFBC         | 450K               |
| cg08070020 | 20         | 40087610        | OpenSea            | COR10A                           | 209          | -0.0553          | 0.0107         | 2.85e-07        | 0.0033                | 0         | 0.5037                     | ---                                                                     | INMA,TG,NFBC,LIFE | 450K/EPIC          |
| cg04872848 | 14         | 76045543        | S Shore            | FLVCR2                           | 209          | 0.0486           | 0.0094         | 2.99e-07        | 0.0034                | 0         | 0.5418                     | +++                                                                     | INMA,TG,NFBC,LIFE | 450K/EPIC          |
| cg15497217 | 1          | 239485905       | OpenSea            |                                  | 208          | 0.0069           | 0.0013         | 3.51e-07        | 0.0039                | 44.9      | 0.1417                     | ---                                                                     | INMA,TG,NFBC,LIFE | 450K/EPIC          |
| cg10611160 | 2          | 13208958        | OpenSea            | ZC3H6                            | 116          | 0.0174           | 0.0034         | 3.51e-07        | 0.0039                | 0         | 0.6722                     | ---                                                                     | TO LIFE           | EPIC               |
| cg06870764 | 1          | 110333590       | OpenSea            |                                  | 116          | 0.0080           | 0.0015         | 3.87e-07        | 0.0041                | 72.7      | 0.0553                     | ++                                                                      | TO LIFE           | EPIC               |
| cg11722711 | 3          | 57166753        | OpenSea            | IL17RD                           | 116          | 0.0176           | 0.0034         | 3.75e-07        | 0.0041                | 23.9      | 0.2514                     | ++                                                                      | TO LIFE           | EPIC               |
| cg22554480 | 8          | 99194030        | OpenSea            |                                  | 116          | 0.0153           | 0.0030         | 3.97e-07        | 0.0041                | 0         | 0.7352                     | ---                                                                     | TO LIFE           | EPIC               |
| cg24802431 | 13         | 112181941       | OpenSea            | MIR101                           | 209          | -0.0372          | 0.0073         | 3.83e-07        | 0.0041                | 28.8      | 0.2390                     | ---                                                                     | INMA,TG,NFBC,LIFE | 450K/EPIC          |
| cg26708920 | 10         | 13828317        | OpenSea            | FRMD4A                           | 116          | -0.4045          | 0.0797         | 3.93e-07        | 0.0041                | 85.2      | 0.0091                     | ---                                                                     | TO LIFE           | EPIC               |
| cg11792726 | 17         | 27028982        | OpenSea            | SUPT6H                           | 209          | -0.0088          | 0.0017         | 4.22e-07        | 0.0043                | 82.6      | 0.0006                     | ---                                                                     | INMA,TG,NFBC,LIFE | 450K/EPIC          |
| cg0907664  | 16         | 34375039        | OpenSea            |                                  | 209          | -0.0431          | 0.0087         | 4.33e-07        | 0.0043                | 66.1      | 0.0312                     | ++                                                                      | INMA,TG,NFBC,LIFE | 450K/EPIC          |
| cg08415582 | 8          | 57030523        | Island             |                                  | 209          | 0.0437           | 0.0086         | 4.49e-07        | 0.0044                | 15.0      | 0.3166                     | +++                                                                     | INMA,TG,NFBC,LIFE | 450K/EPIC          |
| cg10343545 | 1          | 150278094       | OpenSea            | MIR521                           | 116          | 0.0161           | 0.0031         | 4.54e-07        | 0.0044                | 86.8      | 0.0057                     | ++                                                                      | TO LIFE           | EPIC               |
| cg26474270 | 16         | 78092823        | S Shore            | ZFRK3                            | 207          | -0.0091          | 0.0018         | 4.56e-07        | 0.0044                | 0         | 0.6432                     | ---                                                                     | INMA,TG,NFBC,LIFE | 450K/EPIC          |
| cg24072277 | 17         | 65745266        | OpenSea            | KPNB1                            | 116          | 0.0101           | 0.0020         | 5.39e-07        | 0.0051                | 0         | 0.4704                     | ++                                                                      | TO LIFE           | EPIC               |
| cg09277575 | 7          | 137760222       | OpenSea            | AKR1D1                           | 209          | 0.0211           | 0.0042         | 5.60e-07        | 0.0052                | 49.3      | 0.1152                     | +++                                                                     | INMA,TG,NFBC,LIFE | 450K/EPIC          |
| cg08704196 | 16         | 34787392        | Island             |                                  | 93           | -0.0631          | 0.0126         | 5.96e-07        | 0.0055                | 0         | 0.3664                     | ---                                                                     | INMA,NFBC         | 450K               |
| cg1707668  | 12         | 7920169         | S Shelf            |                                  | 208          | 0.0202           | 0.0040         | 6.04e-07        | 0.0058                | 32.3      | 0.1887                     | +++                                                                     | INMA,TG,NFBC,LIFE | 450K/EPIC          |
| cg13257654 | 8          | 42466331        | N Shelf            |                                  | 209          | 0.0298           | 0.0060         | 6.47e-07        | 0.0058                | 54.6      | 0.0853                     | +++                                                                     | INMA,TG,NFBC,LIFE | 450K/EPIC          |
| cg05768032 | 16         | 30646687        | S Shore            |                                  | 209          | -0.0425          | 0.0085         | 6.66e-07        | 0.0059                | 56.4      | 0.0754                     | ++                                                                      | INMA,TG,NFBC,LIFE | 450K/EPIC          |
| cg07283813 | 2          | 69945522        | OpenSea            | PRDM2                            | 207          | -0.0074          | 0.0014         | 7.34e-07        | 0.0063                | 43.0      | 0.1534                     | ---                                                                     | INMA,TG,NFBC,LIFE | 450K/EPIC          |
| cg13210655 | 7          | 155266205       |                    |                                  |              |                  |                |                 |                       |           |                            |                                                                         |                   |                    |

|            |    |           |         |                     |     |         |        |          |        |       |          |      |                   |           |
|------------|----|-----------|---------|---------------------|-----|---------|--------|----------|--------|-------|----------|------|-------------------|-----------|
| cg06652210 | 17 | 1844594   | N Shore | OVC42-DPH1          | 209 | 0.0270  | 0.0055 | 1.04e-06 | 0.0075 | 70.9  | 0.0159   | +++  | INMA.TD.NFBC.LIFE | 450K/EPIC |
| cg17171933 | 12 | 107843355 | OpenSea | BT0011              | 116 | 0.0145  | 0.0029 | 1.11e-06 | 0.0079 | 0     | 0.9160   | ++   | TD.LIFE           | EPIC      |
| cg12727681 | 4  | 14434945  | Island  | PLAG1-LHYMM         | 209 | 0.0164  | 0.0033 | 1.14e-06 | 0.0079 | 0     | 0.9100   | ++++ | INMA.TD.NFBC.LIFE | 450K/EPIC |
| cg15281496 | 2  | 114036564 | S Shore | PAX8                | 116 | -0.0116 | 0.0024 | 1.15e-06 | 0.0079 | 0     | 0.4228   | -    | TD.LIFE           | EPIC      |
| cg12900799 | 8  | 145004388 | S Shore | PLC1                | 209 | -0.0575 | 0.0118 | 1.13e-06 | 0.0079 | 75.4  | 0.0066   | ++   | INMA.TD.NFBC.LIFE | 450K/EPIC |
| cg2641041  | 2  | 426215112 | OpenSea | GIR                 | 116 | -0.0488 | 0.0099 | 1.15e-06 | 0.0079 | 0     | 0.3788   | ---  | TD.LIFE           | EPIC      |
| cg14716911 | 4  | 120077918 | OpenSea | MYO22               | 209 | -0.0504 | 0.0103 | 1.24e-06 | 0.0084 | 57.8  | 0.0084   | +++  | INMA.TD.NFBC.LIFE | 450K/EPIC |
| cg01326048 | 16 | 84560751  | OpenSea |                     | 93  | -0.0481 | 0.0099 | 1.26e-06 | 0.0085 | 0     | 0.4497   | +    | INMA.NFBC         | 450K      |
| cg06208445 | 9  | 113743933 | OpenSea | COL5A1              | 116 | -0.0203 | 0.0041 | 1.29e-06 | 0.0086 | 84.8  | 0.0100   | +    | TD.LIFE           | EPIC      |
| cg19916413 | 8  | 9255160   | OpenSea | NECAB3              | 116 | 0.0361  | 0.0072 | 1.33e-06 | 0.0087 | 0     | 0.9927   | ++   | TD.LIFE           | EPIC      |
| cg02576975 | 19 | 5334189   | N Shore | PTPR5               | 116 | -0.0352 | 0.0073 | 1.39e-06 | 0.0090 | 94.1  | 3.47e-05 | +    | TD.LIFE           | EPIC      |
| cg14021610 | 8  | 1758910   | OpenSea |                     | 115 | -0.0105 | 0.0021 | 1.39e-06 | 0.0090 | 76.2  | 0.0403   | +    | TD.LIFE           | EPIC      |
| cg0544602  | 3  | 38313398  | S Shore | CPDX                | 209 | 0.0311  | 0.0084 | 1.42e-06 | 0.0090 | 25.2  | 0.2008   | +++  | INMA.TD.NFBC.LIFE | 450K/EPIC |
| cg10515296 | 10 | 125607383 | OpenSea | CPM2                | 116 | 0.0095  | 0.0018 | 1.42e-06 | 0.0090 | 0     | 0.8151   | ++   | TD.LIFE           | EPIC      |
| cg22068687 | 2  | 238446065 | OpenSea | MUPH                | 209 | 0.0167  | 0.0034 | 1.48e-06 | 0.0093 | 0     | 0.6687   | ++++ | INMA.TD.NFBC.LIFE | 450K/EPIC |
| cg00176020 | 22 | 24856594  | OpenSea | ADORA2A-AS1         | 116 | 0.0325  | 0.0067 | 1.56e-06 | 0.0097 | 0     | 0.3519   | ++   | TD.LIFE           | EPIC      |
| cg15713801 | 6  | 27636517  | OpenSea |                     | 208 | -0.0504 | 0.0021 | 1.58e-06 | 0.0097 | 41.0  | 0.1655   | ++   | INMA.TD.NFBC.LIFE | 450K/EPIC |
| cg23021153 | 9  | 74357820  | OpenSea | TMEM2               | 116 | 0.0157  | 0.0032 | 1.59e-06 | 0.0097 | 80.7  | 0.0228   | +    | TD.LIFE           | EPIC      |
| cg02351514 | 10 | 124578028 | N Shore |                     | 209 | 0.0355  | 0.0074 | 1.96e-06 | 0.0116 | 34.0  | 0.2077   | +++  | INMA.TD.NFBC.LIFE | 450K/EPIC |
| cg16086277 | 12 | 130927256 | OpenSea | IRMBP2              | 209 | 0.0252  | 0.0053 | 1.96e-06 | 0.0116 | 18.6  | 0.2971   | ++++ | INMA.TD.NFBC.LIFE | 450K/EPIC |
| cg25131261 | 15 | 89158396  | OpenSea |                     | 208 | 0.0092  | 0.0019 | 1.95e-06 | 0.0116 | 49.2  | 0.1162   | ++++ | INMA.TD.NFBC.LIFE | 450K/EPIC |
| cg26112901 | 6  | 117494988 | OpenSea | IL22RA2             | 116 | -0.0046 | 0.0009 | 1.97e-06 | 0.0116 | 52.3  | 0.1472   | -    | TD.LIFE           | EPIC      |
| cg10160402 | 2  | 88316472  | Island  |                     | 93  | 0.0239  | 0.0050 | 2.00e-06 | 0.0117 | 0     | 0.7550   | ++   | INMA.NFBC         | 450K      |
| cg02189017 | 7  | 158913456 | N Shelf |                     | 93  | -0.0147 | 0.0031 | 2.14e-06 | 0.0123 | 0     | 0.9812   | +    | INMA.NFBC         | 450K      |
| cg24617171 | 11 | 121567396 | OpenSea | VIPR2               | 209 | -0.0452 | 0.0095 | 2.14e-06 | 0.0123 | 79.4  | 0.0021   | ---  | INMA.TD.NFBC.LIFE | 450K/EPIC |
| cg03764753 | 2  | 152163155 | OpenSea |                     | 116 | 0.0336  | 0.0071 | 2.24e-06 | 0.0125 | 56.1  | 0.1311   | ++   | TD.LIFE           | EPIC      |
| cg12487466 | 7  | 450021963 | N Shore |                     | 116 | 0.0308  | 0.0065 | 2.19e-06 | 0.0125 | 88.4  | 0.0032   | +    | TD.LIFE           | EPIC      |
| cg19958570 | 19 | 94308002  | Island  |                     | 209 | 0.0237  | 0.0050 | 2.22e-06 | 0.0125 | 52.0  | 0.0995   | ++   | INMA.TD.NFBC.LIFE | 450K/EPIC |
| cg23513183 | 19 | 2858944   | Island  |                     | 209 | -0.0244 | 0.0051 | 2.21e-06 | 0.0125 | 9.03  | 0.3479   | ---  | INMA.TD.NFBC.LIFE | 450K/EPIC |
| cg06715661 | 19 | 18088495  | N Shelf | KCHN1               | 208 | -0.0155 | 0.0033 | 2.41e-06 | 0.0133 | 26.3  | 0.2533   | ---  | INMA.TD.NFBC.LIFE | 450K/EPIC |
| cg10045050 | 12 | 150476580 | S Shore | ALDH1L2             | 209 | 0.0088  | 0.0019 | 2.42e-06 | 0.0133 | 68.3  | 0.0216   | +++  | INMA.TD.NFBC.LIFE | 450K/EPIC |
| cg1436048  | 9  | 139512327 | OpenSea |                     | 209 | -0.0093 | 0.0019 | 2.46e-06 | 0.0133 | 57.1  | 0.0716   | ---  | INMA.TD.NFBC.LIFE | 450K/EPIC |
| cg24309215 | 12 | 121021560 | N Shore |                     | 209 | 0.0498  | 0.0105 | 2.47e-06 | 0.0133 | 0     | 0.7951   | +++  | INMA.TD.NFBC.LIFE | 450K/EPIC |
| cg07789663 | 3  | 141644679 | OpenSea | ATP1B3              | 116 | 0.0070  | 0.0014 | 2.51e-06 | 0.0134 | 78.4  | 0.0313   | +    | TD.LIFE           | EPIC      |
| cg13907014 | 2  | 71481723  | Island  | LOC102800447        | 116 | -0.0178 | 0.0017 | 2.52e-06 | 0.0134 | 82.1  | 0.0003   | ---  | TD.LIFE           | EPIC      |
| cg07793697 | 17 | 80241456  | OpenSea |                     | 209 | 0.0218  | 0.0046 | 2.61e-06 | 0.0136 | 79.6  | 0.0020   | ++   | INMA.TD.NFBC.LIFE | 450K/EPIC |
| cg13412040 | 14 | 59814285  | OpenSea | DMAM1               | 116 | -0.0458 | 0.0097 | 2.63e-06 | 0.0136 | 0     | 0.8745   | -    | TD.LIFE           | EPIC      |
| cg24145057 | 17 | 40912508  | Island  | WHM4                | 207 | -0.0102 | 0.0021 | 2.69e-06 | 0.0136 | 87.6  | 2.24e-05 | +++  | INMA.TD.NFBC.LIFE | 450K/EPIC |
| cg24312002 | 1  | 122289382 | OpenSea | HSPG2               | 209 | 0.0164  | 0.0034 | 2.63e-06 | 0.0136 | 44.2  | 0.1468   | ++   | INMA.TD.NFBC.LIFE | 450K/EPIC |
| cg24773560 | 12 | 56732723  | OpenSea | IL23A               | 209 | 0.0294  | 0.0062 | 2.69e-06 | 0.0138 | 25.2  | 0.2598   | +++  | INMA.TD.NFBC.LIFE | 450K/EPIC |
| cg03707266 | 5  | 25151097  | Island  |                     | 205 | -0.0084 | 0.0018 | 2.88e-06 | 0.0146 | 0     | 0.7687   | ---  | INMA.TD.NFBC.LIFE | 450K/EPIC |
| cg14512044 | 13 | 98991895  | OpenSea | FARP1               | 209 | -0.0067 | 0.0014 | 2.95e-06 | 0.0147 | 70.6  | 0.0167   | ---  | INMA.TD.NFBC.LIFE | 450K/EPIC |
| cg06259244 | 15 | 94132886  | OpenSea |                     | 116 | 0.0245  | 0.0052 | 2.99e-06 | 0.0150 | 47.9  | 0.1657   | ++   | TD.LIFE           | EPIC      |
| cg17811583 | 15 | 51694383  | OpenSea | GLDN                | 209 | 0.0309  | 0.0066 | 3.02e-06 | 0.0150 | 67.7  | 0.0254   | +++  | INMA.TD.NFBC.LIFE | 450K/EPIC |
| cg13695040 | 19 | 2095643   | Island  | C19orf36-MOBL2A     | 209 | -0.0187 | 0.0040 | 3.22e-06 | 0.0158 | 56.4  | 0.0754   | +++  | INMA.TD.NFBC.LIFE | 450K/EPIC |
| cg24129441 | 18 | 14020281  | OpenSea | KCTD1               | 209 | 0.0052  | 0.0019 | 3.24e-06 | 0.0158 | 50.9  | 0.1058   | ++   | INMA.TD.NFBC.LIFE | 450K/EPIC |
| cg01766844 | 3  | 195592946 | N Shore | TNK2                | 209 | -0.0080 | 0.0017 | 3.26e-06 | 0.0158 | 75.8  | 0.0060   | ++   | INMA.TD.NFBC.LIFE | 450K/EPIC |
| cg22647970 | 19 | 38993309  | Island  | RYR1                | 209 | -0.0254 | 0.0054 | 3.40e-06 | 0.0164 | 68.7  | 0.0222   | +-   | INMA.TD.NFBC.LIFE | 450K/EPIC |
| cg10049584 | 10 | 59775638  | OpenSea | BTAF3               | 116 | 0.0074  | 0.0014 | 3.57e-06 | 0.0171 | 64.42 | 0.0042   | ---  | TD.LIFE           | EPIC      |
| cg02094399 | 19 | 14517152  | Island  | CD97                | 93  | 0.0301  | 0.0065 | 3.70e-06 | 0.0176 | 0     | 0.3348   | +    | INMA.NFBC         | 450K      |
| cg16681085 | 6  | 4080051   | S Shore | FAM217A-C6orf201    | 116 | -0.0070 | 0.0015 | 3.76e-06 | 0.0178 | 13.2  | 0.2830   | ---  | TD.LIFE           | EPIC      |
| cg23972540 | 11 | 102758554 | OpenSea | MMP12               | 209 | 0.0158  | 0.0034 | 3.86e-06 | 0.0181 | 11.4  | 0.3353   | ++++ | INMA.TD.NFBC.LIFE | 450K/EPIC |
| cg17278513 | 1  | 12505588  | OpenSea |                     | 115 | -0.0151 | 0.0012 | 3.89e-06 | 0.0182 | 0     | 0.7178   | ---  | TD.LIFE           | EPIC      |
| cg02483641 | 20 | 37264767  | OpenSea | ARHGAP40            | 116 | -0.0366 | 0.0079 | 4.05e-06 | 0.0186 | 84.1  | 0.0120   | -    | TD.LIFE           | EPIC      |
| cg06020723 | 17 | 46693336  | N Shore | HXB8                | 209 | -0.0446 | 0.0096 | 4.05e-06 | 0.0186 | 53.9  | 0.0893   | +-   | INMA.TD.NFBC.LIFE | 450K/EPIC |
| cg17866176 | 2  | 138114908 | OpenSea | ANKRD44             | 116 | 0.0080  | 0.0017 | 4.09e-06 | 0.0187 | 72.3  | 0.0573   | +    | TD.LIFE           | EPIC      |
| cg02145151 | 8  | 94746897  | OpenSea | RBM12B              | 209 | 0.0118  | 0.0025 | 4.21e-06 | 0.0190 | 12.9  | 0.3280   | ---  | INMA.TD.NFBC.LIFE | 450K/EPIC |
| cg15676371 | 5  | 176518013 | N Shelf | FGFR4               | 209 | 0.0055  | 0.0012 | 4.22e-06 | 0.0190 | 86.7  | 4.86e-05 | +++  | INMA.TD.NFBC.LIFE | 450K/EPIC |
| cg06292709 | 16 | 85479952  | OpenSea |                     | 209 | -0.0169 | 0.0036 | 4.25e-06 | 0.0190 | 8.24  | 0.3519   | ---  | INMA.TD.NFBC.LIFE | 450K/EPIC |
| cg00913166 | 4  | 40794000  | OpenSea |                     | 116 | 0.0242  | 0.0020 | 4.36e-06 | 0.0193 | 0     | 0.5760   | ++   | TD.LIFE           | EPIC      |
| cg10572416 | 12 | 123718706 | S Shore | C12orf65            | 208 | 0.0190  | 0.0041 | 4.37e-06 | 0.0193 | 0     | 0.4555   | +++  | INMA.TD.NFBC.LIFE | 450K/EPIC |
| cg08621168 | 8  | 56919462  | OpenSea | LYN                 | 209 | 0.0063  | 0.0013 | 4.56e-06 | 0.0200 | 0     | 0.7420   | +++  | INMA.TD.NFBC.LIFE | 450K/EPIC |
| cg08222069 | 1  | 70387993  | N Shore | PINP1-LPMC7         | 116 | 0.0113  | 0.0088 | 4.64e-06 | 0.0203 | 0     | 0.7843   | ---  | TD.LIFE           | EPIC      |
| cg22530061 | 16 | 3874746   | OpenSea | ELGAP5              | 116 | 0.0043  | 0.0043 | 4.68e-06 | 0.0203 | 90.8  | 0.0009   | +    | TD.LIFE           | EPIC      |
| cg18903679 | 3  | 21782543  | OpenSea | ZNF385D             | 206 | 0.0108  | 0.0023 | 4.74e-06 | 0.0204 | 0     | 0.8353   | ++++ | INMA.TD.NFBC.LIFE | 450K/EPIC |
| cg09427273 | 10 | 11077625  | OpenSea | CUGBP2              | 207 | 0.0116  | 0.0025 | 4.84e-06 | 0.0206 | 49.3  | 0.1152   | +-   | INMA.TD.NFBC.LIFE | 450K/EPIC |
| cg15309953 | 2  | 5813258   | N Shore |                     | 209 | 0.0576  | 0.0126 | 4.83e-06 | 0.0206 | 15.1  | 0.3144   | +++  | INMA.TD.NFBC.LIFE | 450K/EPIC |
| cg07455279 | 19 | 54605703  | N Shore | NDUFA3              | 209 | -0.0452 | 0.0099 | 4.98e-06 | 0.0207 | 0     | 0.6623   | ---  | INMA.TD.NFBC.LIFE | 450K/EPIC |
| cg11105338 | 5  | 176758052 | N Shore |                     | 209 | -0.0104 | 0.0022 | 4.98e-06 | 0.0207 | 19.2  | 0.2941   | +-   | INMA.TD.NFBC.LIFE | 450K/EPIC |
| cg11116798 | 21 | 46116735  | OpenSea | KRTAP10-12-C21orf29 | 209 | -0.0390 | 0.0085 | 5.01e-06 | 0.0207 | 63.0  | 0.0435   | ---  | INMA.TD.NFBC.LIFE | 450K/EPIC |
| cg10551588 | 5  | 9838984   | OpenSea | LOC226692           | 209 | -0.0217 | 0.0047 | 4.94e-06 | 0.0207 | 0     | 0.4000   | +    | INMA.TD.NFBC.LIFE | 450K/EPIC |
| cg27250302 | 19 | 45664609  | OpenSea | NKIP1               | 209 | -0.0365 | 0.0079 | 4.94e-06 | 0.0207 | 16.3  | 0.3095   | ---  | INMA.TD.NFBC.LIFE | 450K/EPIC |
| cg09436502 | 7  | 95226433  | S Shore | PDK4                | 209 | 0.0113  | 0.0024 | 5.16e-06 | 0.0210 | 0     | 0.4760   | +++  | INMA.TD.NFBC.LIFE | 450K/EPIC |
| cg11300667 | 1  | 4749051   | OpenSea | AUP1                | 93  | -0.0279 | 0.0061 | 5.19e-06 | 0.0210 | 4.44  | 0.3063   | ---  | INMA.NFBC         | 450K      |
| cg26649686 | 6  | 29858360  | S Shore | HLA-H               | 138 | -0.0058 | 0.0014 | 5.15e-06 | 0.0210 | 74.7  | 0.0190   | ---  | INMA.NFBC.LIFE    | 450K/EPIC |
| cg16908944 | 11 | 114237417 | OpenSea |                     | 209 | 0.0116  | 0.0025 | 5.28e-06 | 0.0213 | 0     | 0.4424   | ++++ | INMA.TD.NFBC.LIFE | 450K/EPIC |
| cg27425709 | 2  | 111446533 | OpenSea |                     | 209 | 0.0063  | 0.0013 | 5.38e-06 | 0.0216 | 0     | 0.4398   | +++  | INMA.TD.NFBC.LIFE | 450K/EPIC |
| cg05423392 | 16 | 14586837  | OpenSea |                     | 209 | -0.0479 | 0.0105 | 5.59e-06 | 0.0219 | 24.7  | 0.2630   | ---  | INMA.TD.NFBC.LIFE | 450K/EPIC |
| cg16279786 | 2  | 51255306  | Island  | NRXN1               | 93  | 0.0238  | 0.0052 | 5.55e-06 | 0.0219 | 0     | 0.4211   | +    | INMA.NFBC         | 450K      |
| cg22465293 | 1  | 192771439 | OpenSea |                     | 116 | 0.0285  | 0.0062 | 5.58e-06 | 0.0219 | 0     | 0.5932   | ++   | TD.LIFE           | EPIC      |
| cg23562160 | 8  | 709692    | OpenSea |                     | 209 | -0.0302 | 0.0086 | 5.52e-06 | 0.02   |       |          |      |                   |           |

|            |    |           |         |             |     |         |        |          |        |      |        |     |  |                   |           |
|------------|----|-----------|---------|-------------|-----|---------|--------|----------|--------|------|--------|-----|--|-------------------|-----------|
| cg07406237 | 7  | 150110801 | OpenSea |             | 116 | -0.0108 | 0.0024 | 7.86e-06 | 0.0256 | 82.4 | 0.0168 | --  |  | TD LIFE           | EPIC      |
| cg19070159 | 6  | 31829644  | N Shore | NEU1        | 209 | -0.0213 | 0.0052 | 7.23e-06 | 0.0256 | 0    | 0.6025 | --- |  | INMA,TD,NFBC,LIFE | 450K/EPIC |
| cg11903077 | 18 | 12006606  | N Shore | IMPACT      | 207 | -0.0114 | 0.0025 | 7.26e-06 | 0.0256 | 40.0 | 0.1214 | +   |  | INMA,TD,NFBC,LIFE | 450K/EPIC |
| cg03076180 | 16 | 167915947 | N Shelf | EDCA        | 116 | -0.0191 | 0.0042 | 7.69e-06 | 0.0263 | 0    | 0.9403 | --- |  | TD LIFE           | EPIC      |
| cg05926198 | 15 | 13671053  | S Shelf | CGN1,CGN1   | 116 | -0.0299 | 0.0067 | 7.66e-06 | 0.0263 | 65.0 | 0.0908 | +   |  | TD LIFE           | EPIC      |
| cg17669802 | 20 | 18975154  | OpenSea | USC1        | 116 | 0.0186  | 0.0041 | 7.74e-06 | 0.0263 | 83.2 | 0.0144 | --- |  | TD LIFE           | EPIC      |
| cg24542421 | 4  | 174802316 | OpenSea | SHPT2       | 115 | 0.0076  | 0.0017 | 7.68e-06 | 0.0263 | 58.2 | 0.1216 | --- |  | TD LIFE           | EPIC      |
| cg06540283 | 11 | 75337235  | OpenSea | MAP6        | 209 | -0.0068 | 0.0015 | 7.78e-06 | 0.0264 | 14.0 | 0.3221 | --- |  | INMA,TD,NFBC,LIFE | 450K/EPIC |
| cg14820577 | 6  | 138291617 | OpenSea |             | 116 | 0.0339  | 0.0076 | 7.97e-06 | 0.0269 | 87.8 | 0.0040 | +   |  | TD LIFE           | EPIC      |
| cg02001263 | 1  | 8068813   | OpenSea |             | 116 | 0.0108  | 0.0024 | 8.16e-06 | 0.0271 | 6.18 | 0.3018 | --- |  | TD LIFE           | EPIC      |
| cg08121652 | 1  | 48381824  | OpenSea |             | 209 | 0.0353  | 0.0079 | 8.17e-06 | 0.0271 | 70.4 | 0.0173 | +++ |  | INMA,TD,NFBC,LIFE | 450K/EPIC |
| cg11647944 | 12 | 5603148   | N Shore | NTF3        | 209 | 0.0083  | 0.0018 | 8.20e-06 | 0.0271 | 49.5 | 0.1144 | +++ |  | INMA,TD,NFBC,LIFE | 450K/EPIC |
| cg25938030 | 6  | 30180080  | OpenSea | THIM26      | 209 | -0.0095 | 0.0021 | 8.15e-06 | 0.0271 | 26.5 | 0.2523 | --- |  | INMA,TD,NFBC,LIFE | 450K/EPIC |
| cg25070491 | 22 | 18279922  | S Shore | CLTCL       | 209 | 0.0290  | 0.0065 | 8.30e-06 | 0.0274 | 68.7 | 0.0239 | --- |  | INMA,TD,NFBC,LIFE | 450K/EPIC |
| cg02242004 | 8  | 9754896   | N Shore |             | 209 | -0.0364 | 0.0081 | 8.42e-06 | 0.0276 | 0    | 0.4691 | --- |  | INMA,TD,NFBC,LIFE | 450K/EPIC |
| cg09496101 | 15 | 68113110  | N Shore |             | 209 | 0.0225  | 0.0050 | 8.50e-06 | 0.0277 | 82.4 | 0.0006 | --- |  | INMA,TD,NFBC,LIFE | 450K/EPIC |
| cg04302493 | 10 | 135059937 | N Shore | TUBSC2      | 209 | 0.0252  | 0.0029 | 8.54e-06 | 0.0277 | 64.4 | 0.0977 | +++ |  | INMA,TD,NFBC,LIFE | 450K/EPIC |
| cg21462556 | 19 | 843995    | Island  | PRTN3       | 209 | 0.0447  | 0.0100 | 8.93e-06 | 0.0289 | 0    | 0.6299 | +++ |  | INMA,TD,NFBC,LIFE | 450K/EPIC |
| cg07345108 | 10 | 49893463  | OpenSea | WOFY4       | 209 | 0.0175  | 0.0039 | 9.18e-06 | 0.0295 | 38.2 | 0.1827 | +++ |  | INMA,TD,NFBC,LIFE | 450K/EPIC |
| cg19163274 | 10 | 4864328   | Island  | AKR1E2      | 209 | -0.0600 | 0.0116 | 9.31e-06 | 0.0298 | 42.6 | 0.1556 | --- |  | INMA,TD,NFBC,LIFE | 450K/EPIC |
| cg02060235 | 11 | 69931263  | N Shelf | AKO1        | 209 | -0.0079 | 0.0017 | 9.41e-06 | 0.0300 | 0    | 0.4675 | --- |  | INMA,TD,NFBC,LIFE | 450K/EPIC |
| cg14873515 | 5  | 149887461 | OpenSea | ND011       | 209 | 0.0297  | 0.0067 | 9.49e-06 | 0.0301 | 32.6 | 0.2162 | +++ |  | INMA,TD,NFBC,LIFE | 450K/EPIC |
| cg04425110 | 10 | 102902429 | N Shelf |             | 209 | 0.0302  | 0.0068 | 9.61e-06 | 0.0303 | 50.6 | 0.1076 | +++ |  | INMA,TD,NFBC,LIFE | 450K/EPIC |
| cg04754110 | 10 | 40564365  | OpenSea | ZMR1        | 116 | -0.0060 | 0.0013 | 9.89e-06 | 0.0309 | 0    | 0.6349 | --- |  | INMA,NFBC         | 450K      |
| cg11788928 | 7  | 62901268  | OpenSea |             | 116 | 0.0131  | 0.0029 | 9.85e-06 | 0.0309 | 0    | 0.9281 | ++  |  | TD LIFE           | EPIC      |
| cg02715572 | 2  | 75185375  | N Shore | POL4        | 116 | -0.0485 | 0.0110 | 1.00e-05 | 0.0312 | 0    | 0.8324 | --- |  | TD LIFE           | EPIC      |
| cg02658311 | 11 | 77896927  | N Shelf | KCTD21      | 206 | -0.0083 | 0.0018 | 1.01e-05 | 0.0312 | 77.7 | 0.0036 | --- |  | INMA,TD,NFBC,LIFE | 450K/EPIC |
| cg14511782 | 7  | 112714624 | OpenSea | GPMB        | 93  | 0.0383  | 0.0086 | 1.01e-05 | 0.0312 | 0    | 0.4335 | --- |  | INMA,NFBC         | 450K      |
| cg19423170 | 21 | 72472112  | OpenSea | APP         | 116 | -0.0590 | 0.0133 | 1.01e-05 | 0.0312 | 34.2 | 0.2175 | --- |  | TD LIFE           | EPIC      |
| cg09863138 | 2  | 227871081 | OpenSea | COL4A4      | 209 | 0.0054  | 0.0012 | 1.04e-05 | 0.0315 | 49.7 | 0.1129 | +++ |  | INMA,TD,NFBC,LIFE | 450K/EPIC |
| cg15562300 | 4  | 41628401  | S Shore | LMKCH       | 109 | -0.0074 | 0.0016 | 1.03e-05 | 0.0315 | 0    | 0.8665 | --- |  | INMA,TD,NFBC,LIFE | 450K/EPIC |
| cg16747922 | 4  | 2415950   | N Shelf | ZFYV2B      | 109 | 0.0645  | 0.0147 | 1.04e-05 | 0.0315 | 72.3 | 0.0573 | ++  |  | TD LIFE           | EPIC      |
| cg16883132 | 10 | 2249991   | OpenSea |             | 209 | -0.0074 | 0.0016 | 1.04e-05 | 0.0315 | 0    | 0.6757 | --- |  | INMA,TD,NFBC,LIFE | 450K/EPIC |
| cg18581746 | 19 | 53527944  | OpenSea | KLK11       | 116 | 0.0276  | 0.0062 | 1.03e-05 | 0.0315 | 72.5 | 0.0560 | ++  |  | TD LIFE           | EPIC      |
| cg02112962 | 14 | 106249514 | OpenSea |             | 208 | 0.0159  | 0.0036 | 1.06e-05 | 0.0316 | 61.2 | 0.0617 | +++ |  | INMA,TD,NFBC,LIFE | 450K/EPIC |
| cg14435502 | 9  | 92799278  | OpenSea |             | 93  | -0.0414 | 0.0094 | 1.06e-05 | 0.0316 | 69.1 | 0.0715 | +   |  | INMA,NFBC         | 450K      |
| cg16842017 | 8  | 52282401  | OpenSea | PXONL       | 208 | 0.0086  | 0.0019 | 1.06e-05 | 0.0316 | 20.8 | 0.2851 | +++ |  | INMA,TD,NFBC,LIFE | 450K/EPIC |
| cg27212192 | 6  | 50765846  | OpenSea |             | 209 | 0.0126  | 0.0028 | 1.07e-05 | 0.0316 | 38.7 | 0.1795 | +++ |  | INMA,TD,NFBC,LIFE | 450K/EPIC |
| cg02213268 | 16 | 3646441   | OpenSea | SIX4        | 116 | -0.0180 | 0.0041 | 1.08e-05 | 0.0318 | 0    | 0.4343 | --- |  | TD LIFE           | EPIC      |
| cg19004775 | 13 | 100603150 | OpenSea |             | 209 | 0.0492  | 0.0111 | 1.09e-05 | 0.0319 | 0    | 0.8332 | +++ |  | INMA,TD,NFBC,LIFE | 450K/EPIC |
| cg26305957 | 3  | 128840676 | S Shore | RAB43       | 208 | -0.0291 | 0.0066 | 1.09e-05 | 0.0319 | 44.2 | 0.1460 | --- |  | INMA,TD,NFBC,LIFE | 450K/EPIC |
| cg00277865 | 3  | 179274805 | S Shelf |             | 208 | -0.0113 | 0.0025 | 1.10e-05 | 0.0321 | 48.3 | 0.2213 | --- |  | INMA,TD,NFBC,LIFE | 450K/EPIC |
| cg00505936 | 16 | 69139418  | N Shore | HAS3        | 159 | -0.0119 | 0.0027 | 1.11e-05 | 0.0322 | 53.3 | 0.1174 | ++  |  | INMA,NFBC,LIFE    | 450K/EPIC |
| cg03605666 | 19 | 3383594   | S Shore | NFIC        | 209 | -0.0116 | 0.0026 | 1.11e-05 | 0.0322 | 54.0 | 0.0887 | --- |  | INMA,TD,NFBC,LIFE | 450K/EPIC |
| cg27580021 | 13 | 37454023  | OpenSea | SNAD9       | 209 | 0.0389  | 0.0020 | 1.13e-05 | 0.0324 | 50.8 | 0.1069 | +++ |  | INMA,TD,NFBC,LIFE | 450K/EPIC |
| cg24542660 | 2  | 120526564 | Island  | ANKR03      | 207 | -0.0210 | 0.0048 | 1.15e-05 | 0.0327 | 0    | 0.5407 | --- |  | INMA,TD,NFBC,LIFE | 450K/EPIC |
| cg18816605 | 1  | 214602356 | OpenSea | PTPN14      | 208 | -0.0102 | 0.0023 | 1.14e-05 | 0.0327 | 75.4 | 0.0065 | --- |  | INMA,TD,NFBC,LIFE | 450K/EPIC |
| cg16220931 | 2  | 197041071 | OpenSea |             | 116 | 0.0337  | 0.0077 | 1.17e-05 | 0.0333 | 74.3 | 0.0484 | ++  |  | TD LIFE           | EPIC      |
| cg00793407 | 1  | 215314823 | S Shore | RBHM4       | 90  | 0.0034  | 0.0023 | 1.19e-05 | 0.0335 | 0    | 0.8655 | --- |  | INMA,NFBC         | 450K      |
| cg07908977 | 5  | 30174703  | OpenSea | ADGRV1      | 116 | 0.0128  | 0.0029 | 1.19e-05 | 0.0334 | 63.3 | 0.0986 | +   |  | TD LIFE           | EPIC      |
| cg15012214 | 3  | 56810320  | OpenSea | ARHG43      | 209 | -0.0154 | 0.0035 | 1.19e-05 | 0.0334 | 53.8 | 0.0898 | --- |  | INMA,TD,NFBC,LIFE | 450K/EPIC |
| cg00208648 | 13 | 113648882 | Island  | MC7L        | 93  | 0.0074  | 0.0016 | 1.20e-05 | 0.0335 | 0    | 0.7922 | --- |  | INMA,NFBC         | 450K      |
| cg14302428 | 9  | 4139292   | OpenSea | GUS3        | 209 | 0.0229  | 0.0052 | 1.21e-05 | 0.0337 | 0    | 0.6716 | +++ |  | INMA,TD,NFBC,LIFE | 450K/EPIC |
| cg26509139 | 1  | 1342809   | Island  | MRLD3L      | 116 | 0.0067  | 0.0015 | 1.21e-05 | 0.0337 | 56.5 | 0.1292 | ++  |  | TD LIFE           | EPIC      |
| cg14216173 | 18 | 55804389  | OpenSea | NEDD4L      | 116 | -0.0059 | 0.0013 | 1.22e-05 | 0.0338 | 42.4 | 0.1872 | +   |  | TD LIFE           | EPIC      |
| cg00049444 | 19 | 11849919  | S Shore | ZNF823      | 93  | 0.0171  | 0.0039 | 1.24e-05 | 0.0340 | 0    | 0.8432 | --- |  | INMA,NFBC         | 450K      |
| cg09026287 | 16 | 3073788   | OpenSea |             | 116 | 0.0247  | 0.0056 | 1.24e-05 | 0.0340 | 0    | 0.3475 | ++  |  | TD LIFE           | EPIC      |
| cg10653556 | 6  | 142490464 | N Shore | NMB8        | 116 | -0.0315 | 0.0072 | 1.27e-05 | 0.0347 | 0    | 0.3741 | --- |  | TD LIFE           | EPIC      |
| cg09387528 | 21 | 47876058  | N Shelf |             | 209 | 0.0189  | 0.0043 | 1.28e-05 | 0.0349 | 42.7 | 0.1550 | +++ |  | INMA,TD,NFBC,LIFE | 450K/EPIC |
| cg21964391 | 1  | 218213368 | OpenSea |             | 209 | 0.0058  | 0.0023 | 1.29e-05 | 0.0350 | 52.8 | 0.0951 | --- |  | INMA,TD,NFBC,LIFE | 450K/EPIC |
| cg23803838 | 12 | 39064923  | OpenSea | CPNE8       | 116 | 0.0168  | 0.0038 | 1.30e-05 | 0.0350 | 17.5 | 0.2706 | --- |  | TD LIFE           | EPIC      |
| cg08914660 | 3  | 39231907  | OpenSea | XIRP1       | 209 | -0.0102 | 0.0023 | 1.33e-05 | 0.0356 | 0    | 0.5148 | --- |  | INMA,TD,NFBC,LIFE | 450K/EPIC |
| cg25367508 | 20 | 12428437  | Island  | GN45        | 208 | 0.0133  | 0.0030 | 1.33e-05 | 0.0356 | 0    | 0.4897 | --- |  | INMA,TD,NFBC,LIFE | 450K/EPIC |
| cg04343409 | 14 | 10206871  | OpenSea |             | 209 | 0.0065  | 0.0015 | 1.34e-05 | 0.0357 | 0    | 0.4663 | +++ |  | INMA,TD,NFBC,LIFE | 450K/EPIC |
| cg16097041 | 1  | 154965544 | OpenSea | FLAD1,LENEP | 209 | 0.0203  | 0.0046 | 1.38e-05 | 0.0365 | 69.3 | 0.0205 | --- |  | INMA,TD,NFBC,LIFE | 450K/EPIC |
| cg19742870 | 9  | 71860887  | N Shelf | TIF2        | 116 | 0.0381  | 0.0087 | 1.40e-05 | 0.0368 | 0    | 0.7450 | --- |  | TD LIFE           | EPIC      |
| cg13325278 | 22 | 37121023  | OpenSea |             | 116 | -0.0399 | 0.0092 | 1.39e-05 | 0.0368 | 66.3 | 0.0838 | --- |  | TD LIFE           | EPIC      |
| cg13321152 | 7  | 127776528 | S Shore |             | 116 | 0.0222  | 0.0051 | 1.44e-05 | 0.0375 | 0    | 0.7579 | ++  |  | TD LIFE           | EPIC      |
| cg15186147 | 7  | 111791255 | OpenSea | DOCK4       | 91  | -0.0082 | 0.0018 | 1.43e-05 | 0.0375 | 0    | 0.9885 | --- |  | INMA,NFBC         | 450K      |
| cg16602747 | 10 | 119313075 | Island  |             | 209 | 0.0165  | 0.0038 | 1.49e-05 | 0.0388 | 53.3 | 0.0924 | +++ |  | INMA,TD,NFBC,LIFE | 450K/EPIC |
| cg09427265 | 16 | 71932006  | S Shelf | KIAA0174    | 208 | 0.0102  | 0.0023 | 1.52e-05 | 0.0393 | 26.4 | 0.2532 | --- |  | INMA,TD,NFBC,LIFE | 450K/EPIC |
| cg01040654 | 5  | 173632119 | N Shore | NKX2-5      | 209 | 0.0192  | 0.0044 | 1.53e-05 | 0.0394 | 0    | 0.4151 | +++ |  | INMA,TD,NFBC,LIFE | 450K/EPIC |
| cg0631862  | 15 | 99464350  | OpenSea | IGF1R       | 209 | 0.0092  | 0.0021 | 1.52e-05 | 0.0394 | 0    | 0.4614 | +++ |  | INMA,TD,NFBC,LIFE | 450K/EPIC |
| cg09226714 | 8  | 27471953  | Island  | CLU         | 116 | -0.0063 | 0.0014 | 1.55e-05 | 0.0394 | 0    | 0.6693 | --- |  | TD LIFE           | EPIC      |
| cg12175364 | 17 | 1308675   | OpenSea |             | 209 | 0.0144  | 0.0033 | 1.54e-05 | 0.0394 | 3.94 | 0.3730 | +++ |  | INMA,TD,NFBC,LIFE | 450K/EPIC |
| cg16097041 | 7  | 145001428 | Island  | PLEC1       | 209 | -0.0887 | 0.0205 | 1.54e-05 | 0.0394 | 84.6 | 0.0002 | --- |  | INMA,TD,NFBC,LIFE | 450K/EPIC |
| cg21170324 | 20 | 36998917  | OpenSea | LOC149684   | 116 | 0.0418  | 0.0096 | 1.55e-05 | 0.0394 | 90.7 | 0.0010 | --- |  | TD LIFE           | EPIC      |
| cg02072976 | 20 | 106214573 | OpenSea |             | 116 | -0.0348 | 0.0080 | 1.59e-05 | 0.0400 | 0    | 0.5737 | --- |  | TD LIFE           | EPIC      |
| cg02568008 | 13 | 47686886  | OpenSea |             | 116 | -0.0098 | 0.0022 | 1.59e-05 | 0.0400 | 0    | 0.4061 | --- |  | TD LIFE           | EPIC      |
| cg16735986 | 16 | 23767627  | N Shore | CHP2        | 209 | 0       |        |          |        |      |        |     |  |                   |           |

|            |    |           |         |       |     |         |        |          |        |      |        |     |                   |           |
|------------|----|-----------|---------|-------|-----|---------|--------|----------|--------|------|--------|-----|-------------------|-----------|
| cg24504349 | 4  | 120974344 | OpenSea |       | 209 | 0.0158  | 0.0037 | 2.04e-05 | 0.0476 | 78.6 | 0.0028 | +++ | INMA,TD,NFBC,LIFE | 450K/EPIC |
| cg06462044 | 18 | 64491911  | OpenSea |       | 116 | -0.0317 | 0.0084 | 2.07e-05 | 0.0480 | 0    | 0.3403 | --  | TD,LIFE           | EPIC      |
| cg11613450 | 19 | 55721793  | OpenSea | PTPRH | 209 | -0.0411 | 0.0007 | 2.10e-05 | 0.0484 | 0    | 0.4459 | --- | INMA,TD,NFBC,LIFE | 450K/EPIC |
| cg17566238 | 2  | 240046071 | N_Shore | HDACA | 116 | 0.0111  | 0.0026 | 2.10e-05 | 0.0484 | 0    | 0.3392 | ++  | TD,LIFE           | EPIC      |

| Table S10. Meta-analysis results of the BMI-stratified models (all findings, FDR <0.05) and corresponding effect estimates of the opposed BMI-group and the whole group |                                                            |                |                                   |                                                        |                |                 |                                     |                |                 |                     |                                         |                     |                                     |       |
|-------------------------------------------------------------------------------------------------------------------------------------------------------------------------|------------------------------------------------------------|----------------|-----------------------------------|--------------------------------------------------------|----------------|-----------------|-------------------------------------|----------------|-----------------|---------------------|-----------------------------------------|---------------------|-------------------------------------|-------|
| CG#                                                                                                                                                                     | Meta-analysis results of BMI-stratified models (FDR <0.05) |                |                                   | Meta-analysis results of opposed BMI-stratified models |                |                 | Meta-analysis results (whole group) |                |                 |                     | Same effect direction in:               |                     |                                     |       |
|                                                                                                                                                                         | Beta coefficient                                           | Standard error | Meta-analysis model               | Beta coefficient                                       | Standard error | nominal P-value | Beta coefficient                    | Standard error | nominal P-value | Meta-analysis model | Both BMI-stratified CGs and whole group | BMI-group with sign | Both BMI-stratified and whole group |       |
| cg0008075                                                                                                                                                               | -0.572                                                     | 0.1032         | Glycemic index (normal weight)    | -0.583                                                 | 0.1420         | 3.9E-05         | Glycemic index (overweight/obese)   | -0.454         | 0.0885          | 3.3E-07             | Glycemic index (whole group)            | TRUE                | TRUE                                | TRUE  |
| cg0008648                                                                                                                                                               | -0.0074                                                    | 0.0016         | Glycemic load (normal weight)     | 0.0200                                                 | 0.0012         | 0.1095          | Glycemic load (normal weight)       | -0.0006        | 0.0012          | 0.0296              | Glycemic load (whole group)             | TRUE                | TRUE                                | TRUE  |
| cg0008765                                                                                                                                                               | -0.029                                                     | 0.0056         | Glycemic index (normal weight)    | -0.0038                                                | 0.0104         | 0.7096          | Glycemic load (normal weight)       | -0.016         | 0.0047          | 0.0006              | Glycemic load (whole group)             | FALSE               | TRUE                                | FALSE |
| cg0009484                                                                                                                                                               | 0.0171                                                     | 0.0039         | Glycemic load (normal weight)     | 0.0014                                                 | 0.0034         | 0.6807          | Glycemic load (normal weight)       | 0.0016         | 0.0029          | 0.5672              | Glycemic load (whole group)             | TRUE                | TRUE                                | TRUE  |
| cg0017620                                                                                                                                                               | 0.0325                                                     | 0.0067         | Glycemic load (overweight/obese)  | -0.0025                                                | 0.0074         | 0.7346          | Glycemic load (normal weight)       | 0.0325         | 0.0053          | 0.0559              | Glycemic load (whole group)             | TRUE                | TRUE                                | TRUE  |
| cg0026025                                                                                                                                                               | -0.007                                                     | 0.0017         | Glycemic index (overweight/obese) | -0.002                                                 | 0.0014         | 0.0418          | Glycemic index (normal weight)      | -0.003         | 0.0010          | 0.0004              | Glycemic index (whole group)            | TRUE                | TRUE                                | TRUE  |
| cg0033193                                                                                                                                                               | 0.2646                                                     | 0.0374         | Glycemic load (overweight/obese)  | 0.0373                                                 | 0.0382         | 0.3283          | Glycemic load (normal weight)       | 0.0360         | 0.0348          | 0.3015              | Glycemic load (whole group)             | TRUE                | TRUE                                | TRUE  |
| cg0037865                                                                                                                                                               | 0.0113                                                     | 0.0025         | Glycemic index (normal weight)    | -0.001                                                 | 0.0020         | 0.5592          | Glycemic index (overweight/obese)   | 0.0002         | 0.0015          | 0.8637              | Glycemic index (whole group)            | FALSE               | TRUE                                | FALSE |
| cg0041593                                                                                                                                                               | 0.0257                                                     | 0.0048         | Glycemic index (normal weight)    | 3.07E-05                                               | 0.0047         | 0.9848          | Glycemic index (overweight/obese)   | 0.0053         | 0.0037          | 0.1564              | Glycemic index (whole group)            | TRUE                | TRUE                                | TRUE  |
| cg00418087                                                                                                                                                              | -0.037                                                     | 0.0082         | Glycemic index (normal weight)    | -0.003                                                 | 0.0156         | 0.8225          | Glycemic index (overweight/obese)   | -0.021         | 0.0005          | 0.0010              | Glycemic index (whole group)            | TRUE                | TRUE                                | TRUE  |
| cg0050936                                                                                                                                                               | -0.011                                                     | 0.0027         | Glycemic load (overweight/obese)  | 0.0001                                                 | 0.0022         | 0.9597          | Glycemic load (normal weight)       | -0.001         | 0.0016          | 0.4780              | Glycemic load (whole group)             | FALSE               | TRUE                                | FALSE |
| cg0057147                                                                                                                                                               | 0.0215                                                     | 0.0043         | Glycemic index (overweight/obese) | -0.002                                                 | 0.0048         | 0.6054          | Glycemic index (normal weight)      | 0.0010         | 0.0039          | 0.7902              | Glycemic index (whole group)            | FALSE               | TRUE                                | FALSE |
| cg0058861                                                                                                                                                               | 0.0525                                                     | 0.0079         | Glycemic load (overweight/obese)  | -0.003                                                 | 0.0054         | 0.5130          | Glycemic load (normal weight)       | 0.0037         | 0.0046          | 0.4176              | Glycemic load (whole group)             | FALSE               | TRUE                                | FALSE |
| cg0061127                                                                                                                                                               | -0.014                                                     | 0.0029         | Glycemic index (normal weight)    | 0.0018                                                 | 0.0021         | 0.3946          | Glycemic index (overweight/obese)   | -0.001         | 0.0017          | 0.4756              | Glycemic index (whole group)            | FALSE               | TRUE                                | FALSE |
| cg0068312                                                                                                                                                               | -0.025                                                     | 0.0051         | Glycemic load (overweight/obese)  | 0.0012                                                 | 0.0034         | 0.7113          | Glycemic load (normal weight)       | -0.005         | 0.0077          | 0.6622              | Glycemic load (whole group)             | FALSE               | TRUE                                | FALSE |
| cg0071883                                                                                                                                                               | -0.005                                                     | 0.0009         | Glycemic index (overweight/obese) | 0.0017                                                 | 0.0008         | 0.0373          | Glycemic index (normal weight)      | 0.0010         | 0.0006          | 0.1340              | Glycemic index (whole group)            | FALSE               | FALSE                               | FALSE |
| cg0071978                                                                                                                                                               | -0.354                                                     | 0.0761         | Glycemic index (overweight/obese) | -0.133                                                 | 0.0932         | 0.1536          | Glycemic index (normal weight)      | -0.162         | 0.0635          | 0.0083              | Glycemic index (whole group)            | TRUE                | TRUE                                | TRUE  |
| cg0077406                                                                                                                                                               | 0.1743                                                     | 0.0360         | Glycemic index (overweight/obese) | 0.0523                                                 | 0.0683         | 0.4440          | Glycemic index (normal weight)      | 0.081          | 0.0303          | 0.0003              | Glycemic index (whole group)            | TRUE                | TRUE                                | TRUE  |
| cg0079497                                                                                                                                                               | 0.0104                                                     | 0.0023         | Glycemic load (overweight/obese)  | -0.002                                                 | 0.0054         | 0.8879          | Glycemic load (normal weight)       | 0.0001         | 0.0012          | 0.9270              | Glycemic load (whole group)             | FALSE               | TRUE                                | FALSE |
| cg0085068                                                                                                                                                               | -0.067                                                     | 0.0045         | Glycemic load (normal weight)     | 0.0018                                                 | 0.0122         | 0.8826          | Glycemic load (overweight/obese)    | -0.026         | 0.0097          | 0.0024              | Glycemic load (whole group)             | FALSE               | TRUE                                | FALSE |
| cg00910355                                                                                                                                                              | 0.0093                                                     | 0.0021         | Glycemic index (normal weight)    | 0.0007                                                 | 0.0011         | 0.5261          | Glycemic index (overweight/obese)   | 0.0018         | 0.0010          | 0.0814              | Glycemic index (whole group)            | TRUE                | TRUE                                | TRUE  |
| cg00913954                                                                                                                                                              | 0.1631                                                     | 0.0318         | Glycemic index (overweight/obese) | 0.0188                                                 | 0.0336         | 0.1765          | Glycemic load (normal weight)       | 0.0308         | 0.0280          | 0.2709              | Glycemic load (whole group)             | TRUE                | TRUE                                | TRUE  |
| cg00961418                                                                                                                                                              | 0.1603                                                     | 0.0087         | Glycemic load (overweight/obese)  | -0.026                                                 | 0.0058         | 0.1132          | Glycemic load (normal weight)       | -0.026         | 0.0137          | 0.0744              | Glycemic load (whole group)             | FALSE               | TRUE                                | FALSE |
| cg01001263                                                                                                                                                              | 0.0108                                                     | 0.0024         | Glycemic index (normal weight)    | -0.001                                                 | 0.0015         | 0.4281          | Glycemic index (overweight/obese)   | 0.0013         | 0.0012          | 0.2826              | Glycemic index (whole group)            | FALSE               | TRUE                                | FALSE |
| cg01040654                                                                                                                                                              | 0.0192                                                     | 0.0044         | Glycemic load (overweight/obese)  | 0.0007                                                 | 0.0038         | 0.8509          | Glycemic load (normal weight)       | 0.0061         | 0.0030          | 0.0458              | Glycemic load (whole group)             | TRUE                | TRUE                                | TRUE  |
| cg01140247                                                                                                                                                              | 0.1480                                                     | 0.0128         | Glycemic load (overweight/obese)  | -0.025                                                 | 0.0296         | 0.3957          | Glycemic load (normal weight)       | 0.0132         | 0.0127          | 0.5447              | Glycemic load (whole group)             | FALSE               | TRUE                                | FALSE |
| cg01160763                                                                                                                                                              | -0.280                                                     | 0.0758         | Glycemic load (normal weight)     | 0.0078                                                 | 0.0786         | 0.9895          | Glycemic load (overweight/obese)    | -0.091         | 0.0461          | 0.0226              | Glycemic load (whole group)             | TRUE                | TRUE                                | TRUE  |
| cg01245155                                                                                                                                                              | 0.1469                                                     | 0.0293         | Glycemic index (overweight/obese) | -0.032                                                 | 0.0233         | 0.1585          | Glycemic load (normal weight)       | -0.041         | 0.0192          | 0.4593              | Glycemic load (whole group)             | FALSE               | FALSE                               | FALSE |
| cg01245191                                                                                                                                                              | 0.0118                                                     | 0.0025         | Glycemic index (normal weight)    | 0.0019                                                 | 0.0016         | 0.2428          | Glycemic index (overweight/obese)   | 0.0034         | 0.0013          | 0.0122              | Glycemic index (whole group)            | TRUE                | TRUE                                | TRUE  |
| cg01336848                                                                                                                                                              | -0.048                                                     | 0.0099         | Glycemic index (overweight/obese) | 0.0109                                                 | 0.0083         | 0.1330          | Glycemic index (normal weight)      | -0.007         | 0.0066          | 0.2116              | Glycemic index (whole group)            | FALSE               | TRUE                                | FALSE |
| cg01407748                                                                                                                                                              | -0.121                                                     | 0.0220         | Glycemic index (overweight/obese) | -0.019                                                 | 0.0168         | 0.2475          | Glycemic index (normal weight)      | -0.041         | 0.0139          | 0.0027              | Glycemic index (whole group)            | TRUE                | TRUE                                | TRUE  |
| cg01465869                                                                                                                                                              | 0.1812                                                     | 0.0373         | Glycemic load (overweight/obese)  | 0.0426                                                 | 0.0342         | 0.1210          | Glycemic load (normal weight)       | 0.0646         | 0.0256          | 0.0116              | Glycemic load (whole group)             | TRUE                | TRUE                                | TRUE  |
| cg01510292                                                                                                                                                              | 0.2524                                                     | 0.0527         | Glycemic load (overweight/obese)  | -0.011                                                 | 0.0544         | 0.8136          | Glycemic load (normal weight)       | 0.0700         | 0.0346          | 0.0430              | Glycemic load (whole group)             | FALSE               | TRUE                                | FALSE |
| cg01566117                                                                                                                                                              | 0.0367                                                     | 0.0082         | Glycemic index (normal weight)    | 0.0003                                                 | 0.0082         | 0.9404          | Glycemic index (overweight/obese)   | 0.0083         | 0.0049          | 0.0943              | Glycemic index (whole group)            | TRUE                | TRUE                                | TRUE  |
| cg01648310                                                                                                                                                              | -0.035                                                     | 0.0082         | Glycemic load (overweight/obese)  | 0.0031                                                 | 0.0074         | 0.6686          | Glycemic load (normal weight)       | -0.008         | 0.0067          | 0.2268              | Glycemic load (whole group)             | FALSE               | TRUE                                | FALSE |
| cg01728711                                                                                                                                                              | -0.011                                                     | 0.0020         | Glycemic index (normal weight)    | -0.000                                                 | 0.0015         | 0.6624          | Glycemic index (overweight/obese)   | -0.002         | 0.0012          | 0.4888              | Glycemic index (whole group)            | TRUE                | TRUE                                | TRUE  |
| cg01723892                                                                                                                                                              | 0.0037                                                     | 0.0007         | Glycemic index (overweight/obese) | 0.0003                                                 | 0.0007         | 0.4680          | Glycemic index (normal weight)      | 0.0004         | 0.0004          | 0.0034              | Glycemic index (whole group)            | FALSE               | TRUE                                | FALSE |
| cg01768844                                                                                                                                                              | -0.008                                                     | 0.0017         | Glycemic load (overweight/obese)  | 0.0003                                                 | 0.0008         | 0.6618          | Glycemic load (normal weight)       | -0.0003        | 0.0006          | 0.8175              | Glycemic load (whole group)             | FALSE               | TRUE                                | FALSE |
| cg01790002                                                                                                                                                              | -0.067                                                     | 0.0147         | Glycemic load (overweight/obese)  | 0.0296                                                 | 0.0187         | 0.1133          | Glycemic load (normal weight)       | -0.006         | 0.0130          | 0.6456              | Glycemic load (whole group)             | FALSE               | TRUE                                | FALSE |
| cg01912129                                                                                                                                                              | -0.059                                                     | 0.0089         | Glycemic index (overweight/obese) | -0.006                                                 | 0.0017         | 0.0548          | Glycemic index (normal weight)      | -0.012         | 0.0080          | 0.1230              | Glycemic index (whole group)            | TRUE                | TRUE                                | TRUE  |
| cg01945076                                                                                                                                                              | -0.348                                                     | 0.0742         | Glycemic index (normal weight)    | -0.155                                                 | 0.0560         | 0.0042          | Glycemic index (overweight/obese)   | -0.180         | 0.0648          | 0.0033              | Glycemic index (whole group)            | TRUE                | TRUE                                | TRUE  |
| cg01951707                                                                                                                                                              | 0.1595                                                     | 0.0352         | Glycemic load (overweight/obese)  | 0.0273                                                 | 0.0326         | 0.4021          | Glycemic load (normal weight)       | 0.0558         | 0.0283          | 0.0485              | Glycemic load (whole group)             | TRUE                | TRUE                                | TRUE  |
| cg02054431                                                                                                                                                              | 0.1840                                                     | 0.0384         | Glycemic index (overweight/obese) | -0.037                                                 | 0.0373         | 0.3221          | Glycemic index (normal weight)      | -0.002         | 0.0329          | 0.9487              | Glycemic index (whole group)            | FALSE               | FALSE                               | FALSE |
| cg02075976                                                                                                                                                              | -0.034                                                     | 0.0080         | Glycemic load (overweight/obese)  | -0.008                                                 | 0.0068         | 0.2433          | Glycemic load (normal weight)       | -0.017         | 0.0052          | 0.0007              | Glycemic load (whole group)             | TRUE                | TRUE                                | TRUE  |
| cg02115281                                                                                                                                                              | 0.0151                                                     | 0.0029         | Glycemic index (overweight/obese) | 0.0009                                                 | 0.0034         | 0.0384          | Glycemic index (normal weight)      | 0.0003         | 0.0013          | 0.8618              | Glycemic index (whole group)            | FALSE               | TRUE                                | FALSE |
| cg02129962                                                                                                                                                              | 0.0159                                                     | 0.0039         | Glycemic load (overweight/obese)  | 0.000                                                  | 0.0017         | 0.6640          | Glycemic load (normal weight)       | 0.0007         | 0.0014          | 0.6371              | Glycemic load (whole group)             | FALSE               | TRUE                                | FALSE |
| cg02184558                                                                                                                                                              | 1.2527                                                     | 0.2450         | Glycemic index (overweight/obese) | 0.1401                                                 | 0.2568         | 0.0583          | Glycemic load (normal weight)       | 0.5240         | 0.1557          | 0.0007              | Glycemic load (whole group)             | TRUE                | TRUE                                | TRUE  |
| cg02189017                                                                                                                                                              | -0.014                                                     | 0.0033         | Glycemic load (overweight/obese)  | 0.0060                                                 | 0.0030         | 0.0229          | Glycemic load (normal weight)       | -0.001         | 0.0016          | 0.2001              | Glycemic load (whole group)             | FALSE               | FALSE                               | FALSE |
| cg02218268                                                                                                                                                              | -0.018                                                     | 0.0041         | Glycemic load (overweight/obese)  | -0.000                                                 | 0.0022         | 0.6808          | Glycemic load (normal weight)       | -0.004         | 0.0016          | 0.0080              | Glycemic load (whole group)             | TRUE                | TRUE                                | TRUE  |
| cg02242004                                                                                                                                                              | -0.036                                                     | 0.0081         | Glycemic index (normal weight)    | -0.004                                                 | 0.0064         | 0.5027          | Glycemic index (overweight/obese)   | -0.008         | 0.0052          | 0.0899              | Glycemic index (whole group)            | TRUE                | TRUE                                | TRUE  |
| cg02291010                                                                                                                                                              | 0.0268                                                     | 0.0062         | Glycemic index (overweight/obese) | 0.0090                                                 | 0.0057         | 0.1136          | Glycemic index (normal weight)      | 0.0100         | 0.0043          | 0.0121              | Glycemic index (whole group)            | TRUE                | TRUE                                | TRUE  |
| cg02313154                                                                                                                                                              | 0.0355                                                     | 0.0074         | Glycemic index (overweight/obese) | 0.0064                                                 | 0.0063         | 0.0063          | Glycemic index (normal weight)      | 0.0074         | 0.0049          | 0.0022              | Glycemic index (whole group)            | TRUE                | TRUE                                | TRUE  |
| cg02439540                                                                                                                                                              | 0.1934                                                     | 0.0422         | Glycemic load (overweight/obese)  | 0.0021                                                 | 0.0786         | 0.9779          | Glycemic load (normal weight)       | 0.1203         | 0.0349          | 0.0005              | Glycemic load (whole group)             | TRUE                | TRUE                                | TRUE  |
| cg02461739                                                                                                                                                              | -0.034                                                     | 0.0074         | Glycemic index (normal weight)    | -0.001                                                 | 0.0077         | 0.8585          | Glycemic index (overweight/obese)   | -0.008         | 0.0054          | 0.1371              | Glycemic index (whole group)            | TRUE                | TRUE                                | TRUE  |
| cg02479816                                                                                                                                                              | 0.0217                                                     | 0.0162         | Glycemic index (overweight/obese) | 0.013                                                  | 0.0206         | 0.2098          | Glycemic index (normal weight)      | 0.0078         | 0.0203          | 0.3998              | Glycemic index (whole group)            | FALSE               | TRUE                                | FALSE |
| cg02483204                                                                                                                                                              | -0.224                                                     | 0.0502         | Glycemic index (normal weight)    | -0.040                                                 | 0.0391         | 0.3017          | Glycemic index (overweight/obese)   | -0.090         | 0.0317          | 0.0041              | Glycemic index (whole group)            | TRUE                | TRUE                                | TRUE  |
| cg02483641                                                                                                                                                              | -0.036                                                     | 0.0079         | Glycemic index (overweight/obese) | -0.010                                                 | 0.0060         | 0.0731          | Glycemic index (normal weight)      | -0.014         | 0.0055          | 0.0078              | Glycemic index (whole group)            | TRUE                | TRUE                                | TRUE  |
| cg02578008                                                                                                                                                              | -0.009                                                     | 0.0022         | Glycemic load (overweight/obese)  | -0.001                                                 | 0.0012         | 0.1608          | Glycemic load (normal weight)       | -0.002         | 0.0011          | 0.0133              | Glycemic load (whole group)             | TRUE                | TRUE                                | TRUE  |
| cg02578975                                                                                                                                                              | -0.035                                                     | 0.0073         | Glycemic load (overweight/obese)  | 0.0013                                                 | 0.0053         | 0.5133          | Glycemic load (normal weight)       | -0.002         | 0.0042          | 0.5645              | Glycemic load (whole group)             | FALSE               | TRUE                                | FALSE |
| cg02648015                                                                                                                                                              | -0.020                                                     | 0.0046         | Glycemic load (overweight/obese)  | 0.0057                                                 | 0.0030         | 0.0589          | Glycemic load (normal weight)       | 0.0014         | 0.0025          | 0.5789              | Glycemic load (whole group)             | FALSE               | FALSE                               | FALSE |
| cg02715572                                                                                                                                                              | 0.048                                                      | 0.0110         | Glycemic index (normal weight)    | 0.0042                                                 | 0.0097         | 0.6592          | Glycemic index (overweight/obese)   | -0.009         | 0.0073          | 0.1814              | Glycemic index (whole group)            | FALSE               | TRUE                                | FALSE |
| cg02781833                                                                                                                                                              | -0.007                                                     | 0.0014         | Glycemic index (overweight/obese) | 0.0002                                                 | 0.0009         | 0.7789          | Glycemic index (normal weight)      | -0.0009        | 0.0007          | 0.3909              | Glycemic index (whole group)            | FALSE               | TRUE                                | FALSE |
| cg02799334                                                                                                                                                              | -0.208                                                     | 0.0423         | Glycemic load (overweight/obese)  | -0.015                                                 | 0.0737         | 0.8373          | Glycemic load (normal weight)       | -0.053         | 0.0433          | 0.2201              | Glycemic load (whole group)             | TRUE                | TRUE                                | TRUE  |
| cg02909929                                                                                                                                                              | -0.008                                                     | 0.0018         | Glycemic load (overweight/obese)  | -0.002                                                 | 0.0015         | 0.0702          | Glycemic load (normal weight)       | -0.003         | 0.0011          | 0.0022              | Glycemic load (whole group)             | TRUE                | TRUE                                | TRUE  |
| cg02914589                                                                                                                                                              | 0.2667                                                     | 0.0543         | Glycemic load (overweight/obese)  | 0.0166                                                 | 0.0702         | 0.0128          | Glycemic load (normal weight)       | 0.0936         | 0.0394          | 0.0176              | Glycemic load (whole group)             | TRUE                | TRUE                                | TRUE  |
| cg02969380                                                                                                                                                              | 0.1157                                                     | 0.0323         | Glycemic index (overweight/obese) | 0.0087                                                 | 0.0168         | 0.6028          | Glycemic index (normal weight)      | 0.0370         | 0.0139          | 0.0077              | Glycemic index (whole group)            | TRUE                | TRUE                                | TRUE  |
| cg02994399                                                                                                                                                              | 0.0301                                                     | 0.0065         | Glycemic index (overweight/obese) | -0.005                                                 | 0.0049         | 0.2377          | Glycemic index (normal weight)      | 0.0033         | 0.0039          | 0.3949              | Glycemic index (whole group)            | FALSE               | TRUE                                | FALSE |
| cg02994628                                                                                                                                                              | -0.063                                                     | 0.0133         | Glycemic load (overweight/obese)  | 0.0165                                                 | 0.0176         | 0.3493          | Glycemic load (normal weight)       | -0.002         | 0.0104          | 0.8243              | Glycemic load (whole group)             | FALSE               | TRUE                                | FALSE |
| cg03058038                                                                                                                                                              | -0.016                                                     | 0.0034         | Glycemic index (overweight/obese) | -0.003                                                 | 0.0026         | 0.2316          | Glycemic index (normal weight)      | -0.006         | 0.0021          | 0.0039              | Glycemic index (whole group)            | TRUE                | TRUE                                | TRUE  |
| cg03077077                                                                                                                                                              | -0.238                                                     | 0.0527         | Glycemic index (overweight/obese) | 0.0186                                                 | 0.0506         | 0.0978          | Glycemic index (normal weight)      | -0.074         | 0.0414          | 0.0007              | Glycemic index (whole group)            | FALSE               | TRUE                                | FALSE |
| cg03086067                                                                                                                                                              | 0.1720                                                     | 0.0313         | Glycemic load (overweight/obese)  | 0.0235                                                 | 0.0230         | 0.3058          | Glycemic load (normal weight)       | 0.0613         | 0.0173          | 0.0004              | Glycemic load (whole group)             | TRUE                | TRUE                                | TRUE  |
| cg03114609                                                                                                                                                              | -0.017                                                     | 0.0083         | Glycemic index (overweight/obese) | -0.000                                                 | 0.0066         | 0.8972          | Glycemic index (normal weight)      | -0.007         | 0.0055          | 0.1265              | Glycemic index (whole group)            | TRUE                | TRUE                                | TRUE  |
| cg03128512                                                                                                                                                              | -0.3836                                                    | 0.0740         | Glycemic load (overweight/obese)  | 0.0229                                                 | 0.0939         | 0.0049          | Glycemic load (normal weight)       | 0.1242         | 0.0614          | 0.0431              | Glycemic load (whole group)             | TRUE                | TRUE                                | TRUE  |
|                                                                                                                                                                         |                                                            |                |                                   |                                                        |                |                 |                                     |                |                 |                     |                                         |                     |                                     |       |

|            |        |        |                                   |         |        |        |                                   |         |        |          |                              |       |       |
|------------|--------|--------|-----------------------------------|---------|--------|--------|-----------------------------------|---------|--------|----------|------------------------------|-------|-------|
| cg04426554 | -0.113 | 0.0247 | Glycemic load (overweight/obese)  | -0.022  | 0.0317 | 0.4757 | Glycemic index (normal weight)    | -0.077  | 0.0189 | 4.27e-05 | Glycemic load (whole group)  | TRUE  | TRUE  |
| cg04434994 | -0.075 | 0.0155 | Glycemic index (overweight/obese) | -0.002  | 0.0164 | 0.8741 | Glycemic index (normal weight)    | -0.016  | 0.0145 | 0.2632   | Glycemic index (whole group) | TRUE  | TRUE  |
| cg04515610 | -0.004 | 0.0013 | Glycemic index (normal weight)    | -0.001  | 0.0013 | 0.0014 | Glycemic index (normal weight)    | -0.012  | 0.0098 | 0.4572   | Glycemic index (whole group) | FALSE | FALSE |
| cg04813149 | 0.0851 | 0.0173 | Glycemic index (normal weight)    | 0.0569  | 0.0207 | 0.0200 | Glycemic index (overweight/obese) | 0.0313  | 0.0153 | 0.0414   | Glycemic index (whole group) | TRUE  | TRUE  |
| cg04833280 | 0.1705 | 0.0303 | Glycemic index (normal weight)    | 0.0385  | 0.0329 | 0.2423 | Glycemic index (overweight/obese) | 0.0730  | 0.0213 | 0.0017   | Glycemic index (whole group) | TRUE  | TRUE  |
| cg04872848 | 0.0486 | 0.0094 | Glycemic load (overweight/obese)  | -0.006  | 0.0066 | 0.0068 | Glycemic load (normal weight)     | 0.0088  | 0.0052 | 0.0058   | Glycemic load (whole group)  | FALSE | FALSE |
| cg04886668 | 0.0394 | 0.0051 | Glycemic load (overweight/obese)  | 0.0019  | 0.0060 | 0.1484 | Glycemic load (normal weight)     | 0.0074  | 0.0046 | 0.1079   | Glycemic load (whole group)  | TRUE  | TRUE  |
| cg04891843 | 0.0491 | 0.0109 | Glycemic load (overweight/obese)  | -0.000  | 0.0088 | 0.0802 | Glycemic load (normal weight)     | 0.0163  | 0.0063 | 0.0102   | Glycemic load (whole group)  | FALSE | FALSE |
| cg04987950 | -0.054 | 0.0115 | Glycemic load (overweight/obese)  | 0.0096  | 0.0109 | 0.1754 | Glycemic load (normal weight)     | -0.004  | 0.0085 | 0.5651   | Glycemic load (whole group)  | FALSE | TRUE  |
| cg05040501 | -0.011 | 0.0023 | Glycemic load (overweight/obese)  | -0.002  | 0.0013 | 0.0563 | Glycemic load (normal weight)     | -0.001  | 0.0011 | 0.0156   | Glycemic load (whole group)  | TRUE  | TRUE  |
| cg05041307 | -0.022 | 0.0039 | Glycemic index (overweight/obese) | 0.0055  | 0.0120 | 0.6480 | Glycemic index (normal weight)    | -0.016  | 0.0038 | 1.79e-05 | Glycemic index (whole group) | FALSE | FALSE |
| cg05084137 | -0.098 | 0.0177 | Glycemic load (overweight/obese)  | 0.0022  | 0.0301 | 0.9409 | Glycemic load (normal weight)     | -0.005  | 0.0181 | 0.7510   | Glycemic load (whole group)  | FALSE | FALSE |
| cg05164421 | 0.3923 | 0.0454 | Glycemic load (overweight/obese)  | -0.046  | 0.0533 | 0.0812 | Glycemic load (normal weight)     | -0.0004 | 0.0422 | 0.9923   | Glycemic load (whole group)  | FALSE | FALSE |
| cg05232496 | -0.021 | 0.0040 | Glycemic load (overweight/obese)  | 0.0045  | 0.0024 | 0.0812 | Glycemic load (normal weight)     | 0.0008  | 0.0020 | 0.0959   | Glycemic load (whole group)  | FALSE | FALSE |
| cg05235903 | -0.039 | 0.0089 | Glycemic load (overweight/obese)  | 0.0067  | 0.0061 | 0.2682 | Glycemic load (normal weight)     | -0.001  | 0.0045 | 0.7540   | Glycemic load (whole group)  | FALSE | TRUE  |
| cg05269359 | 0.0039 | 0.0008 | Glycemic load (overweight/obese)  | 0.0008  | 0.0009 | 0.3446 | Glycemic load (normal weight)     | 0.0013  | 0.0006 | 0.0550   | Glycemic load (whole group)  | TRUE  | TRUE  |
| cg05327271 | 0.2887 | 0.0000 | Glycemic load (overweight/obese)  | 0.0069  | 0.0092 | 0.9054 | Glycemic load (normal weight)     | 0.0723  | 0.0412 | 0.0802   | Glycemic load (whole group)  | TRUE  | TRUE  |
| cg05336486 | 0.1972 | 0.0431 | Glycemic index (overweight/obese) | -0.003  | 0.0639 | 0.9504 | Glycemic index (normal weight)    | 0.0428  | 0.0400 | 0.2844   | Glycemic index (whole group) | FALSE | TRUE  |
| cg05399244 | -0.153 | 0.0226 | Glycemic load (overweight/obese)  | -0.025  | 0.0356 | 0.4798 | Glycemic load (normal weight)     | -0.037  | 0.0264 | 0.1514   | Glycemic load (whole group)  | TRUE  | TRUE  |
| cg05431285 | 0.1174 | 0.0291 | Glycemic load (overweight/obese)  | -0.018  | 0.0224 | 0.4159 | Glycemic load (normal weight)     | 0.0098  | 0.0192 | 0.6081   | Glycemic load (whole group)  | FALSE | FALSE |
| cg05433392 | -0.047 | 0.0105 | Glycemic index (overweight/obese) | 0.0024  | 0.0071 | 0.1728 | Glycemic index (normal weight)    | -0.010  | 0.0068 | 0.0741   | Glycemic index (whole group) | FALSE | FALSE |
| cg05433258 | 0.2728 | 0.0537 | Glycemic index (overweight/obese) | -0.009  | 0.0796 | 0.9017 | Glycemic index (normal weight)    | 0.0782  | 0.0582 | 0.1791   | Glycemic index (whole group) | FALSE | FALSE |
| cg05442602 | 0.0311 | 0.0064 | Glycemic index (overweight/obese) | 0.0010  | 0.0045 | 0.8165 | Glycemic index (normal weight)    | 0.0057  | 0.0037 | 0.1290   | Glycemic index (whole group) | TRUE  | TRUE  |
| cg05474605 | 0.0257 | 0.0036 | Glycemic load (overweight/obese)  | -0.000  | 0.0034 | 0.9555 | Glycemic load (normal weight)     | 0.0041  | 0.0028 | 0.1511   | Glycemic load (whole group)  | FALSE | FALSE |
| cg05492603 | -0.021 | 0.0048 | Glycemic index (normal weight)    | -0.005  | 0.0025 | 0.0204 | Glycemic index (overweight/obese) | -0.009  | 0.0020 | 1.33e-06 | Glycemic index (whole group) | TRUE  | TRUE  |
| cg05523449 | 0.0099 | 0.0020 | Glycemic load (overweight/obese)  | 0.0027  | 0.0013 | 0.0440 | Glycemic load (normal weight)     | 0.0035  | 0.0011 | 0.0023   | Glycemic load (whole group)  | TRUE  | TRUE  |
| cg05747251 | 0.2535 | 0.0412 | Glycemic index (overweight/obese) | 0.0231  | 0.0426 | 0.5871 | Glycemic index (normal weight)    | 0.0824  | 0.0297 | 0.0055   | Glycemic index (whole group) | TRUE  | TRUE  |
| cg05751971 | 0.0084 | 0.0015 | Glycemic load (overweight/obese)  | -0.000  | 0.0014 | 0.7740 | Glycemic load (normal weight)     | 0.0010  | 0.0007 | 0.0010   | Glycemic load (whole group)  | FALSE | TRUE  |
| cg05768032 | -0.042 | 0.0085 | Glycemic load (overweight/obese)  | 0.0137  | 0.0086 | 0.1427 | Glycemic load (normal weight)     | -0.003  | 0.0074 | 0.6292   | Glycemic load (whole group)  | FALSE | FALSE |
| cg05853306 | 0.0101 | 0.0019 | Glycemic index (normal weight)    | -0.005  | 0.0045 | 0.2506 | Glycemic index (overweight/obese) | 0.0086  | 0.0017 | 8.07e-07 | Glycemic index (whole group) | FALSE | TRUE  |
| cg05855673 | -0.061 | 0.0138 | Glycemic load (overweight/obese)  | -0.000  | 0.0103 | 0.9794 | Glycemic load (normal weight)     | -0.000  | 0.0090 | 0.2580   | Glycemic load (whole group)  | TRUE  | FALSE |
| cg05930158 | -0.025 | 0.0087 | Glycemic index (normal weight)    | 0.0053  | 0.0063 | 0.3199 | Glycemic index (overweight/obese) | -0.000  | 0.0047 | 0.5293   | Glycemic index (whole group) | FALSE | FALSE |
| cg06068645 | -0.000 | 0.0041 | Glycemic index (normal weight)    | 0.0034  | 0.0023 | 0.1504 | Glycemic index (overweight/obese) | 0.0003  | 0.0020 | 0.8561   | Glycemic index (whole group) | FALSE | FALSE |
| cg06259244 | 0.0245 | 0.0052 | Glycemic load (overweight/obese)  | -0.000  | 0.0024 | 0.8739 | Glycemic load (normal weight)     | 0.0030  | 0.0023 | 0.1997   | Glycemic load (whole group)  | FALSE | TRUE  |
| cg06258111 | -0.008 | 0.0018 | Glycemic load (overweight/obese)  | -0.000  | 0.0018 | 0.0872 | Glycemic load (normal weight)     | -0.001  | 0.0009 | 0.0608   | Glycemic load (whole group)  | TRUE  | TRUE  |
| cg06289282 | 0.0606 | 0.0134 | Glycemic load (overweight/obese)  | 0.0081  | 0.0115 | 0.4815 | Glycemic load (normal weight)     | 0.0203  | 0.0083 | 0.0145   | Glycemic load (whole group)  | TRUE  | TRUE  |
| cg06292709 | -0.016 | 0.0036 | Glycemic index (overweight/obese) | 0.0029  | 0.0024 | 0.2375 | Glycemic index (normal weight)    | -1.110  | 0.0019 | 0.9914   | Glycemic index (whole group) | FALSE | TRUE  |
| cg06307169 | 0.0549 | 0.0109 | Glycemic index (normal weight)    | 0.0182  | 0.0091 | 0.0471 | Glycemic index (overweight/obese) | 0.0108  | 0.0072 | 0.1349   | Glycemic index (whole group) | TRUE  | TRUE  |
| cg06311862 | 0.0092 | 0.0021 | Glycemic index (normal weight)    | 0.0013  | 0.0015 | 0.1429 | Glycemic index (overweight/obese) | 0.0028  | 0.0013 | 0.0409   | Glycemic index (whole group) | TRUE  | TRUE  |
| cg06337940 | 0.0555 | 0.0124 | Glycemic index (normal weight)    | -0.000  | 0.0126 | 0.9786 | Glycemic index (overweight/obese) | 0.0092  | 0.0095 | 0.3344   | Glycemic index (whole group) | FALSE | TRUE  |
| cg06433421 | 0.1828 | 0.0396 | Glycemic index (overweight/obese) | -0.030  | 0.0343 | 0.3749 | Glycemic index (normal weight)    | 0.0338  | 0.0251 | 0.1282   | Glycemic index (whole group) | FALSE | FALSE |
| cg06452044 | -0.021 | 0.0084 | Glycemic index (normal weight)    | -0.0076 | 0.0050 | 0.0265 | Glycemic index (overweight/obese) | -0.007  | 0.0045 | 0.8684   | Glycemic index (whole group) | FALSE | FALSE |
| cg06510234 | -0.052 | 0.0117 | Glycemic index (normal weight)    | -0.001  | 0.0077 | 0.8389 | Glycemic index (overweight/obese) | -0.009  | 0.0061 | 0.1177   | Glycemic index (whole group) | TRUE  | TRUE  |
| cg06540283 | -0.006 | 0.0015 | Glycemic load (overweight/obese)  | -0.000  | 0.0010 | 0.4070 | Glycemic load (normal weight)     | -0.001  | 0.0008 | 0.0497   | Glycemic load (whole group)  | TRUE  | TRUE  |
| cg06602723 | -0.044 | 0.0096 | Glycemic load (overweight/obese)  | -0.003  | 0.0094 | 0.4713 | Glycemic load (normal weight)     | -0.015  | 0.0073 | 0.0388   | Glycemic load (whole group)  | TRUE  | TRUE  |
| cg06632210 | 0.0170 | 0.0055 | Glycemic index (normal weight)    | -0.002  | 0.0056 | 0.4140 | Glycemic index (overweight/obese) | 0.0005  | 0.0040 | 0.1844   | Glycemic index (whole group) | FALSE | FALSE |
| cg06655190 | 0.0252 | 0.0047 | Glycemic load (normal weight)     | 0.0125  | 0.0048 | 0.0099 | Glycemic load (overweight/obese)  | 0.0108  | 0.0036 | 0.0029   | Glycemic load (whole group)  | TRUE  | TRUE  |
| cg06715661 | -0.015 | 0.0033 | Glycemic load (overweight/obese)  | -0.000  | 0.0018 | 0.7384 | Glycemic load (normal weight)     | -0.002  | 0.0016 | 0.1854   | Glycemic load (whole group)  | TRUE  | TRUE  |
| cg06870704 | 0.0080 | 0.0015 | Glycemic load (overweight/obese)  | 0.0003  | 0.0015 | 0.7558 | Glycemic load (normal weight)     | 0.000   | 0.0009 | 0.0237   | Glycemic load (whole group)  | TRUE  | TRUE  |
| cg06913166 | 0.0142 | 0.0030 | Glycemic load (overweight/obese)  | 0.0001  | 0.0017 | 0.0799 | Glycemic load (normal weight)     | 0.0005  | 0.0015 | 0.7459   | Glycemic load (whole group)  | FALSE | TRUE  |
| cg06950364 | 0.1775 | 0.0373 | Glycemic index (overweight/obese) | -0.024  | 0.0295 | 0.3988 | Glycemic index (normal weight)    | 0.0122  | 0.0246 | 0.6193   | Glycemic index (whole group) | FALSE | TRUE  |
| cg07016556 | 0.0235 | 0.0052 | Glycemic index (normal weight)    | 0.0102  | 0.0048 | 0.0447 | Glycemic index (overweight/obese) | 0.0126  | 0.0039 | 0.0012   | Glycemic index (whole group) | TRUE  | TRUE  |
| cg07040338 | -0.043 | 0.0078 | Glycemic load (overweight/obese)  | -0.000  | 0.0078 | 0.0059 | Glycemic load (normal weight)     | -0.004  | 0.0049 | 0.1205   | Glycemic load (whole group)  | FALSE | TRUE  |
| cg07089275 | 0.0391 | 0.0079 | Glycemic load (overweight/obese)  | 0.0030  | 0.0044 | 0.6386 | Glycemic load (normal weight)     | 0.0066  | 0.0037 | 0.0739   | Glycemic load (whole group)  | TRUE  | TRUE  |
| cg07138414 | -0.084 | 0.0174 | Glycemic load (overweight/obese)  | 0.0081  | 0.0181 | 0.6513 | Glycemic load (normal weight)     | -0.014  | 0.0126 | 0.2393   | Glycemic load (whole group)  | FALSE | FALSE |
| cg07151406 | 0.4022 | 0.0609 | Glycemic load (overweight/obese)  | -0.001  | 0.0562 | 0.9797 | Glycemic load (normal weight)     | 0.0357  | 0.0484 | 0.4607   | Glycemic load (whole group)  | FALSE | TRUE  |
| cg07196761 | 0.0442 | 0.0089 | Glycemic index (overweight/obese) | -0.002  | 0.0063 | 0.7095 | Glycemic index (normal weight)    | 0.0070  | 0.0051 | 0.1728   | Glycemic index (whole group) | FALSE | TRUE  |
| cg07241220 | -0.361 | 0.0700 | Glycemic index (overweight/obese) | -0.033  | 0.0662 | 0.6102 | Glycemic index (normal weight)    | -0.109  | 0.0567 | 0.0530   | Glycemic index (whole group) | TRUE  | TRUE  |
| cg07345108 | 0.0175 | 0.0039 | Glycemic index (normal weight)    | 0.0020  | 0.0034 | 0.5632 | Glycemic index (overweight/obese) | 0.0058  | 0.0025 | 0.0218   | Glycemic index (whole group) | TRUE  | TRUE  |
| cg07406217 | -0.010 | 0.0024 | Glycemic load (overweight/obese)  | -0.000  | 0.0015 | 0.6350 | Glycemic load (normal weight)     | -0.002  | 0.0013 | 0.0511   | Glycemic load (whole group)  | TRUE  | TRUE  |
| cg07455279 | -0.045 | 0.0099 | Glycemic load (overweight/obese)  | 0.0077  | 0.0082 | 0.3469 | Glycemic load (normal weight)     | -0.005  | 0.0070 | 0.4450   | Glycemic load (whole group)  | FALSE | FALSE |
| cg07456387 | -0.203 | 0.0428 | Glycemic load (overweight/obese)  | -0.051  | 0.0620 | 0.4080 | Glycemic load (normal weight)     | -0.080  | 0.0351 | 0.0226   | Glycemic load (whole group)  | TRUE  | TRUE  |
| cg07513425 | -0.131 | 0.0252 | Glycemic load (overweight/obese)  | -0.031  | 0.0173 | 0.8990 | Glycemic load (normal weight)     | -0.078  | 0.0207 | 0.0001   | Glycemic load (whole group)  | TRUE  | TRUE  |
| cg07562888 | -0.013 | 0.0029 | Glycemic index (overweight/obese) | 0.000   | 0.0020 | 0.1179 | Glycemic index (normal weight)    | -0.001  | 0.0016 | 0.4020   | Glycemic index (whole group) | FALSE | FALSE |
| cg07589563 | 0.0070 | 0.0014 | Glycemic load (overweight/obese)  | -0.001  | 0.0009 | 0.2669 | Glycemic load (normal weight)     | -0.0002 | 0.0008 | 0.7350   | Glycemic load (whole group)  | FALSE | FALSE |
| cg07723258 | -0.019 | 0.0031 | Glycemic load (overweight/obese)  | 0.0023  | 0.0029 | 0.4224 | Glycemic load (normal weight)     | -0.002  | 0.0024 | 0.3979   | Glycemic load (whole group)  | FALSE | FALSE |
| cg07739369 | 0.0218 | 0.0046 | Glycemic load (overweight/obese)  | -0.005  | 0.0035 | 0.0983 | Glycemic load (normal weight)     | 0.0001  | 0.0030 | 0.9695   | Glycemic load (whole group)  | FALSE | FALSE |
| cg07777964 | 0.0714 | 0.0160 | Glycemic load (overweight/obese)  | -0.014  | 0.0145 | 0.3152 | Glycemic load (normal weight)     | 0.0130  | 0.0109 | 0.2342   | Glycemic load (whole group)  | FALSE | TRUE  |
| cg07908697 | 0.0128 | 0.0029 | Glycemic index (normal weight)    | 0.0018  | 0.0020 | 0.1703 | Glycemic index (overweight/obese) | 0.0020  | 0.0019 | 0.2859   | Glycemic index (whole group) | TRUE  | TRUE  |
| cg07944721 | -0.030 | 0.0068 | Glycemic index (normal weight)    | -0.001  | 0.0052 | 0.1724 | Glycemic index (overweight/obese) | -0.005  | 0.0038 | 0.1518   | Glycemic index (whole group) | TRUE  | TRUE  |
| cg07970823 | 0.2561 | 0.0549 | Glycemic load (overweight/obese)  | -0.025  | 0.0521 | 0.6254 | Glycemic load (normal weight)     | 0.1129  | 0.0379 | 0.0029   | Glycemic load (whole group)  | FALSE | FALSE |
| cg07980773 | 0.1945 | 0.0359 | Glycemic load (normal weight)     | -0.003  | 0.0475 | 0.9456 | Glycemic load (overweight/obese)  | 0.0650  | 0.0305 | 0.0331   | Glycemic load (whole group)  | FALSE | FALSE |
| cg08036104 | 0.1141 | 0.0229 | Glycemic load (overweight/obese)  | 0.0452  | 0.0254 | 0.0796 | Glycemic load (normal weight)     | 0.0345  | 0.0176 | 0.6095   | Glycemic load (whole group)  | TRUE  | TRUE  |
| cg08042492 | -0.067 | 0.0127 | Glycemic load (overweight/obese)  | -0.019  | 0.0137 | 0.1491 | Glycemic load (normal weight)     | -0.021  | 0.0105 | 0.0331   | Glycemic load (whole group)  | TRUE  | TRUE  |
| cg08121652 | 0.0353 | 0.0079 | Glycemic index (overweight/obese) | -0.000  | 0.0049 | 0.8770 | Glycemic index (normal weight)    | 0.0041  | 0.0041 | 0.6056   | Glycemic index (whole group) | FALSE | FALSE |
| cg08128087 | 0.1123 | 0.0248 | Glycemic index (overweight/obese) | 0.0132  | 0.0223 | 0.5530 | Glycemic index (normal weight)    | 0.0166  | 0.0184 | 0.3663   | Glycemic index (whole group) | TRUE  | TRUE  |
| cg08158042 | 0.1079 | 0.0242 | Glycemic index (overweight/obese) | -0.033  | 0.0205 | 0.1020 | Glycemic index (normal weight)    | 0.0087  | 0.0158 | 0.5814   | Glycemic index (whole group) | FALSE | FALSE |
| cg08169770 | 0.0755 | 0.0168 | Glycemic load (overweight/obese)  | -0.002  | 0.0139 | 0.8487 | Glycemic load (normal weight)     | 0.0109  | 0.0108 | 0.1154   | Glycemic load (whole group)  | FALSE | FALSE |
| cg08161480 | 0.0193 | 0.0044 | Glycemic load (overweight/obese)  | -0.001  | 0.0038 | 0.7085 | Glycemic load (normal weight)     | 0.0028  | 0.0033 | 0.3937   | Glycemic load (              |       |       |

|            |         |        |                                   |           |        |        |                                   |         |        |          |                              |       |      |       |
|------------|---------|--------|-----------------------------------|-----------|--------|--------|-----------------------------------|---------|--------|----------|------------------------------|-------|------|-------|
| cg0266287  | 0.0247  | 0.0056 | Glycemic load (overweight/obese)  | 0.0008    | 0.0031 | 0.7830 | Glycemic load (normal weight)     | 0.0039  | 0.0027 | 0.1532   | Glycemic load (whole group)  | TRUE  | TRUE | TRUE  |
| cg0277575  | 0.0211  | 0.0042 | Glycemic load (overweight/obese)  | 0.0014    | 0.0029 | 0.6139 | Glycemic load (normal weight)     | 0.0022  | 0.0025 | 0.1747   | Glycemic load (whole group)  | TRUE  | TRUE | TRUE  |
| cg0911240  | 0.0051  | 0.0010 | Glycemic load (overweight/obese)  | 0.0002    | 0.0007 | 0.3114 | Glycemic load (normal weight)     | 0.0011  | 0.0004 | 0.1266   | Glycemic load (whole group)  | TRUE  | TRUE | TRUE  |
| cg0936910  | 0.0810  | 0.0168 | Glycemic load (overweight/obese)  | 0.0048    | 0.0152 | 0.7496 | Glycemic load (normal weight)     | 0.0258  | 0.0130 | 0.0319   | Glycemic load (whole group)  | TRUE  | TRUE | TRUE  |
| cg0943728  | 0.0189  | 0.0043 | Glycemic index (overweight/obese) | -0.002    | 0.0033 | 0.5007 | Glycemic index (normal weight)    | 0.0013  | 0.0027 | 0.6189   | Glycemic index (whole group) | FALSE | TRUE | FALSE |
| cg0941273  | 0.0116  | 0.0025 | Glycemic load (overweight/obese)  | -0.009    | 0.0020 | 0.5147 | Glycemic load (normal weight)     | 0.0019  | 0.0019 | 0.6091   | Glycemic load (whole group)  | FALSE | TRUE | FALSE |
| cg09417745 | 0.0102  | 0.0023 | Glycemic load (overweight/obese)  | 0.0002    | 0.0021 | 0.9021 | Glycemic load (normal weight)     | 0.0019  | 0.0017 | 0.2570   | Glycemic load (whole group)  | TRUE  | TRUE | TRUE  |
| cg09415668 | -0.041  | 0.0070 | Glycemic index (overweight/obese) | 0.0020    | 0.0060 | 0.7357 | Glycemic index (normal weight)    | -0.008  | 0.0046 | 0.0620   | Glycemic index (whole group) | FALSE | TRUE | FALSE |
| cg09416502 | 0.0113  | 0.0024 | Glycemic load (overweight/obese)  | 0.0014    | 0.0021 | 0.5143 | Glycemic load (normal weight)     | 0.0032  | 0.0016 | 0.0512   | Glycemic load (whole group)  | TRUE  | TRUE | TRUE  |
| cg0949610  | 0.0225  | 0.0050 | Glycemic index (overweight/obese) | 0.0017    | 0.0040 | 0.3572 | Glycemic index (normal weight)    | 0.0060  | 0.0031 | 0.0549   | Glycemic index (whole group) | TRUE  | TRUE | TRUE  |
| cg09628931 | 0.0102  | 0.0023 | Glycemic load (overweight/obese)  | 0.0006    | 0.0012 | 0.6128 | Glycemic load (normal weight)     | 0.0017  | 0.0010 | 0.1001   | Glycemic load (whole group)  | TRUE  | TRUE | TRUE  |
| cg09697644 | -0.044  | 0.0087 | Glycemic load (overweight/obese)  | -0.000    | 0.0055 | 0.9041 | Glycemic load (normal weight)     | -0.006  | 0.0048 | 0.1698   | Glycemic load (whole group)  | TRUE  | TRUE | TRUE  |
| cg09728927 | 0.0091  | 0.0012 | Glycemic load (overweight/obese)  | 0.0004    | 0.0010 | 0.6944 | Glycemic load (normal weight)     | 0.0013  | 0.0008 | 0.1117   | Glycemic load (whole group)  | TRUE  | TRUE | TRUE  |
| cg09758167 | -0.018  | 0.0040 | Glycemic load (overweight/obese)  | 0.0039    | 0.0017 | 0.0025 | Glycemic load (normal weight)     | 0.0009  | 0.0016 | 0.3550   | Glycemic load (whole group)  | FALSE | TRUE | FALSE |
| cg09854726 | 0.1301  | 0.0260 | Glycemic load (overweight/obese)  | 0.0086    | 0.0231 | 0.7095 | Glycemic load (normal weight)     | 0.0298  | 0.0192 | 0.1201   | Glycemic load (whole group)  | TRUE  | TRUE | TRUE  |
| cg09863138 | 0.0054  | 0.0012 | Glycemic load (overweight/obese)  | 0.0002    | 0.0007 | 0.7345 | Glycemic load (normal weight)     | 0.0004  | 0.0005 | 0.4708   | Glycemic load (whole group)  | TRUE  | TRUE | TRUE  |
| cg09870200 | -0.051  | 0.0057 | Glycemic index (overweight/obese) | -0.001    | 0.0074 | 0.3539 | Glycemic index (normal weight)    | -0.008  | 0.0059 | 0.1356   | Glycemic index (whole group) | TRUE  | TRUE | TRUE  |
| cg10138206 | -0.141  | 0.0314 | Glycemic load (overweight/obese)  | -0.027    | 0.0286 | 0.3287 | Glycemic load (normal weight)     | -0.047  | 0.0216 | 0.0294   | Glycemic load (whole group)  | TRUE  | TRUE | TRUE  |
| cg10196042 | 0.0239  | 0.0050 | Glycemic index (overweight/obese) | -0.001    | 0.0032 | 0.7109 | Glycemic index (normal weight)    | 0.0028  | 0.0025 | 0.2618   | Glycemic index (whole group) | FALSE | TRUE | FALSE |
| cg10226761 | -0.164  | 0.0142 | Glycemic load (overweight/obese)  | -0.000    | 0.0230 | 0.9882 | Glycemic load (normal weight)     | -0.025  | 0.0191 | 0.1779   | Glycemic load (whole group)  | TRUE  | TRUE | TRUE  |
| cg10304160 | 0.0911  | 0.0196 | Glycemic load (overweight/obese)  | 0.0040    | 0.0197 | 0.8393 | Glycemic load (normal weight)     | 0.0128  | 0.0151 | 0.1287   | Glycemic load (whole group)  | TRUE  | TRUE | TRUE  |
| cg10341940 | -0.007  | 0.0017 | Glycemic load (overweight/obese)  | -0.0003   | 0.0013 | 0.7764 | Glycemic load (normal weight)     | -0.000  | 0.0010 | 0.7161   | Glycemic load (whole group)  | FALSE | TRUE | FALSE |
| cg10343545 | 0.0161  | 0.0031 | Glycemic index (normal weight)    | 0.0017    | 0.0017 | 0.3234 | Glycemic index (overweight/obese) | 0.0037  | 0.0015 | 0.0155   | Glycemic index (whole group) | TRUE  | TRUE | TRUE  |
| cg10349674 | 0.4701  | 0.0394 | Glycemic index (normal weight)    | 0.0020    | 0.1327 | 0.9078 | Glycemic index (overweight/obese) | 0.1227  | 0.0818 | 0.1680   | Glycemic index (whole group) | TRUE  | TRUE | TRUE  |
| cg10389914 | 0.0078  | 0.0015 | Glycemic load (overweight/obese)  | 0.0007    | 0.0011 | 0.3297 | Glycemic load (normal weight)     | 0.0019  | 0.0010 | 0.0530   | Glycemic load (whole group)  | TRUE  | TRUE | TRUE  |
| cg10402715 | 0.0921  | 0.0197 | Glycemic load (overweight/obese)  | -0.022    | 0.0162 | 0.1642 | Glycemic load (normal weight)     | 0.0038  | 0.0137 | 0.7791   | Glycemic load (whole group)  | FALSE | TRUE | FALSE |
| cg10506615 | 0.3300  | 0.0576 | Glycemic index (normal weight)    | 0.0064    | 0.0711 | 0.5276 | Glycemic index (overweight/obese) | 0.1535  | 0.0457 | 0.0007   | Glycemic index (whole group) | TRUE  | TRUE | TRUE  |
| cg10636896 | 0.0843  | 0.0183 | Glycemic index (obese)            | -0.001    | 0.0168 | 0.9251 | Glycemic index (normal weight)    | 0.0142  | 0.0138 | 0.3660   | Glycemic index (whole group) | FALSE | TRUE | FALSE |
| cg10653506 | -0.031  | 0.0072 | Glycemic load (overweight/obese)  | -9.06e-05 | 0.0035 | 0.9797 | Glycemic load (normal weight)     | -0.003  | 0.0031 | 0.3956   | Glycemic load (whole group)  | TRUE  | TRUE | TRUE  |
| cg10672416 | 0.0190  | 0.0041 | Glycemic index (normal weight)    | 0.0022    | 0.0027 | 0.4150 | Glycemic index (overweight/obese) | 0.0053  | 0.0021 | 0.0135   | Glycemic index (whole group) | TRUE  | TRUE | TRUE  |
| cg10708645 | -0.531  | 0.0978 | Glycemic load (normal weight)     | -0.002    | 0.0984 | 0.4938 | Glycemic load (overweight/obese)  | -0.004  | 0.0945 | 2.28e-05 | Glycemic load (whole group)  | FALSE | TRUE | FALSE |
| cg10878784 | 0.2030  | 0.0444 | Glycemic load (overweight/obese)  | 0.0024    | 0.0233 | 0.4567 | Glycemic load (normal weight)     | 0.0309  | 0.0264 | 0.2417   | Glycemic load (whole group)  | FALSE | TRUE | FALSE |
| cg11050338 | -0.010  | 0.0022 | Glycemic index (normal weight)    | -0.000    | 0.0014 | 0.7618 | Glycemic index (overweight/obese) | -0.001  | 0.0011 | 0.1768   | Glycemic index (whole group) | TRUE  | TRUE | TRUE  |
| cg11116798 | -0.039  | 0.0085 | Glycemic index (overweight/obese) | 0.0071    | 0.0041 | 0.0875 | Glycemic index (normal weight)    | -0.005  | 0.0036 | 0.1566   | Glycemic index (whole group) | FALSE | TRUE | FALSE |
| cg11120516 | -0.0017 | 0.0005 | Glycemic load (normal weight)     | -0.001    | 0.0015 | 0.9421 | Glycemic load (overweight/obese)  | 0.0016  | 0.0005 | 0.0011   | Glycemic load (whole group)  | FALSE | TRUE | FALSE |
| cg11217901 | -0.554  | 0.1192 | Glycemic load (overweight/obese)  | -0.061    | 0.1529 | 0.6873 | Glycemic load (normal weight)     | -0.083  | 0.1006 | 0.4067   | Glycemic load (whole group)  | TRUE  | TRUE | TRUE  |
| cg11380667 | -0.027  | 0.0061 | Glycemic load (overweight/obese)  | 0.0025    | 0.0031 | 0.8101 | Glycemic load (normal weight)     | -0.003  | 0.0027 | 0.2645   | Glycemic load (whole group)  | FALSE | TRUE | FALSE |
| cg11544106 | 0.0317  | 0.0081 | Glycemic load (overweight/obese)  | 0.0013    | 0.0053 | 0.0839 | Glycemic load (normal weight)     | 0.0046  | 0.0046 | 0.1515   | Glycemic load (whole group)  | FALSE | TRUE | FALSE |
| cg11564411 | 0.1810  | 0.0389 | Glycemic load (overweight/obese)  | 0.0212    | 0.0061 | 0.0279 | Glycemic load (normal weight)     | 0.0281  | 0.0343 | 0.0227   | Glycemic load (whole group)  | TRUE  | TRUE | TRUE  |
| cg11613450 | -0.041  | 0.0097 | Glycemic load (overweight/obese)  | -6.54e-05 | 0.0052 | 0.9900 | Glycemic load (normal weight)     | -0.006  | 0.0043 | 0.1107   | Glycemic load (whole group)  | TRUE  | TRUE | TRUE  |
| cg11623578 | 0.0105  | 0.0021 | Glycemic index (overweight/obese) | -0.002    | 0.0015 | 0.1360 | Glycemic index (normal weight)    | -0.008  | 0.0012 | 0.4848   | Glycemic index (whole group) | FALSE | TRUE | FALSE |
| cg11647944 | 0.0081  | 0.0018 | Glycemic load (normal weight)     | 0.0009    | 0.0009 | 0.0009 | Glycemic load (overweight/obese)  | 0.0009  | 0.0008 | 0.2010   | Glycemic load (whole group)  | FALSE | TRUE | FALSE |
| cg11722711 | 0.0176  | 0.0034 | Glycemic index (normal weight)    | -0.001    | 0.0014 | 0.4804 | Glycemic index (overweight/obese) | 0.0006  | 0.0014 | 0.6603   | Glycemic index (whole group) | FALSE | TRUE | FALSE |
| cg11751808 | 0.0132  | 0.0023 | Glycemic load (overweight/obese)  | -0.000    | 0.0012 | 0.6807 | Glycemic load (normal weight)     | 0.0008  | 0.0011 | 0.4623   | Glycemic load (whole group)  | FALSE | TRUE | FALSE |
| cg11788928 | 0.0131  | 0.0029 | Glycemic load (overweight/obese)  | 0.0002    | 0.0016 | 0.8840 | Glycemic load (normal weight)     | 0.0012  | 0.0015 | 0.4231   | Glycemic load (whole group)  | TRUE  | TRUE | TRUE  |
| cg11792226 | -0.0107 | 0.0017 | Glycemic load (overweight/obese)  | -0.001    | 0.0014 | 0.0107 | Glycemic load (normal weight)     | -0.001  | 0.0011 | 0.1421   | Glycemic load (whole group)  | TRUE  | TRUE | TRUE  |
| cg11893951 | -0.200  | 0.0405 | Glycemic load (overweight/obese)  | -0.049    | 0.0356 | 0.1638 | Glycemic load (normal weight)     | -0.097  | 0.0263 | 0.0002   | Glycemic load (whole group)  | TRUE  | TRUE | TRUE  |
| cg12022532 | -0.198  | 0.0395 | Glycemic index (normal weight)    | -0.043    | 0.0434 | 0.3171 | Glycemic index (overweight/obese) | -0.065  | 0.0289 | 0.0239   | Glycemic index (whole group) | TRUE  | TRUE | TRUE  |
| cg12055844 | 0.0524  | 0.0115 | Glycemic index (overweight/obese) | 0.0018    | 0.0118 | 0.1469 | Glycemic index (normal weight)    | 0.0103  | 0.0094 | 0.1784   | Glycemic index (whole group) | FALSE | TRUE | FALSE |
| cg12133283 | 0.2592  | 0.0517 | Glycemic load (overweight/obese)  | 0.0101    | 0.0872 | 0.0973 | Glycemic load (normal weight)     | 0.0367  | 0.0513 | 0.4742   | Glycemic load (whole group)  | TRUE  | TRUE | TRUE  |
| cg12463578 | -0.061  | 0.0135 | Glycemic index (normal weight)    | 0.0270    | 0.0121 | 0.0258 | Glycemic index (overweight/obese) | 0.0079  | 0.0098 | 0.4195   | Glycemic index (whole group) | FALSE | TRUE | FALSE |
| cg12487466 | 0.0308  | 0.0065 | Glycemic index (normal weight)    | -0.007    | 0.0045 | 0.1051 | Glycemic index (overweight/obese) | -0.0004 | 0.0036 | 0.3109   | Glycemic index (whole group) | FALSE | TRUE | FALSE |
| cg12571155 | -0.129  | 0.0135 | Glycemic load (overweight/obese)  | -0.082    | 0.0172 | 0.7886 | Glycemic load (normal weight)     | -0.128  | 0.0242 | 0.0501   | Glycemic load (whole group)  | FALSE | TRUE | FALSE |
| cg12625126 | -0.399  | 0.0638 | Glycemic index (normal weight)    | -0.101    | 0.0464 | 0.0291 | Glycemic index (overweight/obese) | -0.128  | 0.0351 | 0.0002   | Glycemic index (whole group) | TRUE  | TRUE | TRUE  |
| cg12652118 | -0.159  | 0.0345 | Glycemic index (overweight/obese) | -0.028    | 0.0342 | 0.4116 | Glycemic index (normal weight)    | -0.080  | 0.0239 | 0.0008   | Glycemic index (whole group) | TRUE  | TRUE | TRUE  |
| cg12723234 | -0.073  | 0.0143 | Glycemic index (normal weight)    | 0.0003    | 0.0189 | 0.9849 | Glycemic index (overweight/obese) | -0.038  | 0.0106 | 0.0001   | Glycemic index (whole group) | FALSE | TRUE | FALSE |
| cg12736602 | -0.084  | 0.0179 | Glycemic load (overweight/obese)  | -0.004    | 0.0177 | 0.8050 | Glycemic load (normal weight)     | -0.034  | 0.0110 | 0.0016   | Glycemic load (whole group)  | TRUE  | TRUE | TRUE  |
| cg12757684 | 0.0164  | 0.0033 | Glycemic index (normal weight)    | 0.0010    | 0.0037 | 0.7899 | Glycemic index (overweight/obese) | 0.0031  | 0.0026 | 0.2430   | Glycemic index (whole group) | TRUE  | TRUE | TRUE  |
| cg12787530 | 0.0126  | 0.0024 | Glycemic index (overweight/obese) | -0.001    | 0.0017 | 0.4331 | Glycemic index (normal weight)    | 0.0022  | 0.0014 | 0.1193   | Glycemic index (whole group) | FALSE | TRUE | FALSE |
| cg12807668 | 0.0022  | 0.0040 | Glycemic load (overweight/obese)  | 0.0043    | 0.0023 | 0.1929 | Glycemic load (normal weight)     | 0.0036  | 0.0028 | 0.1994   | Glycemic load (whole group)  | TRUE  | TRUE | TRUE  |
| cg12832555 | 0.1104  | 0.0228 | Glycemic index (normal weight)    | 0.028     | 0.0288 | 0.3220 | Glycemic index (overweight/obese) | -0.001  | 0.0243 | 0.9642   | Glycemic index (whole group) | FALSE | TRUE | FALSE |
| cg12884719 | 0.3251  | 0.0643 | Glycemic index (overweight/obese) | 0.0074    | 0.1141 | 0.9482 | Glycemic index (normal weight)    | 0.0862  | 0.0611 | 1.583    | Glycemic index (whole group) | TRUE  | TRUE | TRUE  |
| cg13011069 | 0.0078  | 0.0015 | Glycemic load (overweight/obese)  | 0.0057    | 0.0037 | 0.1249 | Glycemic load (normal weight)     | 0.0066  | 0.0013 | 1.99e-06 | Glycemic load (whole group)  | TRUE  | TRUE | TRUE  |
| cg13069970 | 0.0380  | 0.0048 | Glycemic index (overweight/obese) | -0.000    | 0.0036 | 0.8302 | Glycemic index (normal weight)    | 0.0034  | 0.0029 | 0.2532   | Glycemic index (whole group) | FALSE | TRUE | FALSE |
| cg13117164 | -0.054  | 0.0122 | Glycemic load (overweight/obese)  | 0.0084    | 0.0089 | 0.3425 | Glycemic load (normal weight)     | -0.007  | 0.0072 | 0.2784   | Glycemic load (whole group)  | FALSE | TRUE | FALSE |
| cg13210655 | -0.057  | 0.0115 | Glycemic index (overweight/obese) | -0.004    | 0.0118 | 0.0643 | Glycemic index (normal weight)    | -0.026  | 0.0084 | 0.0015   | Glycemic index (whole group) | TRUE  | TRUE | TRUE  |
| cg13217654 | 0.0298  | 0.0060 | Glycemic load (overweight/obese)  | 0.007     | 0.0043 | 0.1029 | Glycemic load (normal weight)     | 0.0007  | 0.0039 | 0.8409   | Glycemic load (whole group)  | FALSE | TRUE | FALSE |
| cg13321152 | 0.0222  | 0.0051 | Glycemic load (overweight/obese)  | 0.0159    | 0.0070 | 0.0239 | Glycemic load (normal weight)     | 0.0192  | 0.0045 | 2.82e-05 | Glycemic load (whole group)  | TRUE  | TRUE | TRUE  |
| cg13412040 | -0.045  | 0.0097 | Glycemic index (overweight/obese) | -0.013    | 0.0095 | 0.1559 | Glycemic index (normal weight)    | -0.027  | 0.0075 | 0.0003   | Glycemic index (whole group) | TRUE  | TRUE | TRUE  |
| cg13422870 | -0.097  | 0.0179 | Glycemic index (normal weight)    | -0.007    | 0.0137 | 0.5710 | Glycemic index (overweight/obese) | -0.020  | 0.0116 | 0.0767   | Glycemic index (whole group) | TRUE  | TRUE | TRUE  |
| cg13456980 | -0.041  | 0.0086 | Glycemic index (overweight/obese) | 0.0168    | 0.0055 | 0.0044 | Glycemic index (normal weight)    | 0.0005  | 0.0000 | 0.9139   | Glycemic index (whole group) | FALSE | TRUE | FALSE |
| cg13551783 | 0.0306  | 0.0062 | Glycemic load (overweight/obese)  | -0.005    | 0.0046 | 0.1114 | Glycemic load (normal weight)     | 0.0041  | 0.0034 | 0.2322   | Glycemic load (whole group)  | FALSE | TRUE | FALSE |
| cg13679804 | 0.1575  | 0.0334 | Glycemic load (overweight/obese)  | 0.0243    | 0.0454 | 0.5921 | Glycemic load (normal weight)     | 0.0622  | 0.0393 | 0.0402   | Glycemic load (whole group)  | TRUE  | TRUE | TRUE  |
| cg13679817 | 0.1127  | 0.0210 | Glycemic index (overweight/obese) | 0.0017    | 0.0213 | 0.2090 | Glycemic index (normal weight)    | 0.0113  | 0.0137 | 0.4200   | Glycemic index (whole group) | FALSE | TRUE | FALSE |
| cg13689560 | -0.018  | 0.0040 | Glycemic index (overweight/obese) | -0.005    | 0.0032 | 0.0865 | Glycemic index (normal weight)    | -0.007  | 0.0038 | 0.0056   | Glycemic index (whole group) | TRUE  | TRUE | TRUE  |
| cg13848802 | 0.0107  | 0.0020 | Glycemic index (overweight/obese) | 6.59e-06  | 0.0015 | 0.9965 | Glycemic index (normal weight)    | 0.0010  | 0.0013 | 0.4154   | Glycemic index (whole group) |       |      |       |

|              |         |         |                                   |         |        |        |                                   |         |        |          |                              |       |       |       |
|--------------|---------|---------|-----------------------------------|---------|--------|--------|-----------------------------------|---------|--------|----------|------------------------------|-------|-------|-------|
| cat15162330  | -0.006  | 0.0015  | Glycemic load (overweight/obese)  | 0.0011  | 0.0013 | 0.3668 | Glycemic load (normal weight)     | -0.001  | 0.0010 | 0.2613   | Glycemic load (whole group)  | FALSE | TRUE  | FALSE |
| cat15196147  | -0.008  | 0.0018  | Glycemic load (overweight/obese)  | 0.0012  | 0.0015 | 0.4138 | Glycemic load (normal weight)     | -0.009  | 0.0011 | 0.4090   | Glycemic load (whole group)  | FALSE | TRUE  | FALSE |
| cat15248875  | -0.1    | 0.291   | Glycemic load (overweight/obese)  | 0.0449  | 0.0673 | 0.6649 | Glycemic load (normal weight)     | -0.042  | 0.084  | 0.0300   | Glycemic load (whole group)  | FALSE | TRUE  | FALSE |
| cat15281496  | -0.011  | 0.0024  | Glycemic load (overweight/obese)  | 0.000   | 0.0020 | 0.6438 | Glycemic load (normal weight)     | -0.003  | 0.0015 | 0.0352   | Glycemic load (whole group)  | TRUE  | TRUE  | TRUE  |
| cat15282031  | -0.074  | 0.0150  | Glycemic load (overweight/obese)  | -0.021  | 0.0242 | 0.4782 | Glycemic load (normal weight)     | -0.051  | 0.0125 | 4.20e-05 | Glycemic load (whole group)  | TRUE  | TRUE  | TRUE  |
| cat15309913  | -0.0576 | 0.0126  | Glycemic index (overweight/obese) | 0.0058  | 0.0087 | 0.5047 | Glycemic index (normal weight)    | -0.027  | 0.0087 | 0.0231   | Glycemic index (whole group) | TRUE  | TRUE  | TRUE  |
| cat15415571  | -0.1064 | 0.0233  | Glycemic index (overweight/obese) | -0.015  | 0.0220 | 0.4888 | Glycemic index (normal weight)    | -0.036  | 0.0167 | 0.4141   | Glycemic index (whole group) | FALSE | TRUE  | FALSE |
| cat15432367  | -0.1350 | 0.0293  | Glycemic load (overweight/obese)  | -0.009  | 0.0225 | 0.6793 | Glycemic load (normal weight)     | -0.032  | 0.0179 | 0.0637   | Glycemic load (whole group)  | FALSE | TRUE  | FALSE |
| cat15449979  | -0.1165 | 0.0257  | Glycemic index (overweight/obese) | -0.002  | 0.0175 | 0.9048 | Glycemic index (normal weight)    | -0.0162 | 0.0143 | 0.2566   | Glycemic index (whole group) | FALSE | TRUE  | FALSE |
| cat15497249  | -0.0069 | 0.0013  | Glycemic index (overweight/obese) | -0.009  | 0.0007 | 0.3389 | Glycemic index (normal weight)    | -0.004  | 0.0006 | 0.0007   | Glycemic index (whole group) | TRUE  | TRUE  | TRUE  |
| cat15506702  | -0.0943 | 0.0174  | Glycemic load (overweight/obese)  | -0.007  | 0.0246 | 0.7757 | Glycemic load (normal weight)     | -0.039  | 0.0151 | 0.0253   | Glycemic load (whole group)  | FALSE | TRUE  | FALSE |
| cat15589104  | -0.2672 | 0.0529  | Glycemic index (normal weight)    | -0.015  | 0.0588 | 0.7915 | Glycemic index (overweight/obese) | 0.0042  | 0.0361 | 0.9056   | Glycemic index (whole group) | FALSE | TRUE  | FALSE |
| cat15645485  | -0.137  | 0.0283  | Glycemic load (overweight/obese)  | -0.020  | 0.0288 | 0.7499 | Glycemic load (normal weight)     | -0.041  | 0.0224 | 0.8622   | Glycemic load (whole group)  | TRUE  | TRUE  | TRUE  |
| cat15676371  | -0.0055 | 0.0012  | Glycemic load (overweight/obese)  | -0.000  | 0.0007 | 0.4246 | Glycemic load (normal weight)     | -0.000  | 0.0006 | 0.8999   | Glycemic load (whole group)  | FALSE | TRUE  | FALSE |
| cat15713801  | -0.005  | 0.0011  | Glycemic load (overweight/obese)  | 0.0002  | 0.0007 | 0.7488 | Glycemic load (normal weight)     | -0.0003 | 0.0006 | 0.6364   | Glycemic load (whole group)  | FALSE | TRUE  | FALSE |
| cat15735129  | -0.1637 | 0.0355  | Glycemic index (overweight/obese) | -0.015  | 0.0213 | 0.4602 | Glycemic index (normal weight)    | -0.027  | 0.0179 | 0.4764   | Glycemic index (whole group) | FALSE | TRUE  | FALSE |
| cat15737559  | -0.035  | 0.0075  | Glycemic index (overweight/obese) | -0.003  | 0.0089 | 0.7380 | Glycemic index (normal weight)    | -0.011  | 0.0090 | 0.5985   | Glycemic index (whole group) | TRUE  | TRUE  | TRUE  |
| cat15892776  | -0.101  | 0.0203  | Glycemic load (overweight/obese)  | -0.001  | 0.0173 | 0.9394 | Glycemic load (normal weight)     | -0.034  | 0.0135 | 0.0106   | Glycemic load (whole group)  | TRUE  | TRUE  | TRUE  |
| cat16049584  | -0.0074 | 0.0016  | Glycemic load (overweight/obese)  | 0.0010  | 0.0008 | 0.2174 | Glycemic load (normal weight)     | 0.0021  | 0.0006 | 0.0009   | Glycemic load (whole group)  | TRUE  | TRUE  | TRUE  |
| cat16051296  | -0.0289 | -0.0018 | Glycemic load (overweight/obese)  | -0.000  | 0.0019 | 0.8054 | Glycemic load (normal weight)     | 0.0009  | 0.0014 | 0.4920   | Glycemic load (whole group)  | FALSE | TRUE  | FALSE |
| cat16096217  | -0.0252 | 0.0053  | Glycemic index (overweight/obese) | -0.003  | 0.0043 | 0.4403 | Glycemic index (normal weight)    | -0.007  | 0.0013 | 0.0065   | Glycemic index (whole group) | TRUE  | TRUE  | TRUE  |
| cat16096180  | -0.2483 | -0.0550 | Glycemic load (overweight/obese)  | -0.065  | 0.0431 | 0.1284 | Glycemic load (normal weight)     | -0.0756 | 0.0348 | 0.0300   | Glycemic load (whole group)  | FALSE | TRUE  | FALSE |
| cat16097041  | -0.0203 | 0.0046  | Glycemic load (overweight/obese)  | 0.0010  | 0.0039 | 0.7943 | Glycemic load (normal weight)     | 0.0022  | 0.0031 | 0.4646   | Glycemic load (whole group)  | TRUE  | TRUE  | TRUE  |
| cat161034509 | -0.0394 | 0.0083  | Glycemic load (overweight/obese)  | 0.0050  | 0.0047 | 0.7789 | Glycemic load (normal weight)     | 0.0074  | 0.0042 | 0.0811   | Glycemic load (whole group)  | TRUE  | TRUE  | TRUE  |
| cat16220931  | -0.0337 | 0.0077  | Glycemic load (overweight/obese)  | -0.0053 | 0.0063 | 0.3974 | Glycemic load (normal weight)     | -0.0087 | 0.0053 | 0.1027   | Glycemic load (whole group)  | TRUE  | TRUE  | TRUE  |
| cat16279786  | -0.0238 | 0.0052  | Glycemic load (overweight/obese)  | 0.0083  | 0.0042 | 0.0495 | Glycemic load (normal weight)     | 0.0091  | 0.0034 | 0.0082   | Glycemic load (whole group)  | TRUE  | TRUE  | TRUE  |
| cat16350349  | -0.3052 | 0.0669  | Glycemic index (normal weight)    | 0.1141  | 0.0823 | 0.1659 | Glycemic index (overweight/obese) | 0.0900  | 0.0530 | 0.0895   | Glycemic index (whole group) | TRUE  | TRUE  | TRUE  |
| cat16451865  | -0.0277 | 0.0049  | Glycemic index (overweight/obese) | -0.009  | 0.0039 | 0.9541 | Glycemic index (normal weight)    | -0.003  | 0.0002 | 0.0001   | Glycemic index (whole group) | TRUE  | TRUE  | TRUE  |
| cat16533029  | -0.2583 | 0.0541  | Glycemic index (normal weight)    | -0.069  | 0.0715 | 0.3279 | Glycemic index (overweight/obese) | 0.0610  | 0.0426 | 0.1525   | Glycemic index (whole group) | TRUE  | TRUE  | TRUE  |
| cat16555188  | -0.021  | 0.0047  | Glycemic index (overweight/obese) | 0.0042  | 0.0031 | 0.1680 | Glycemic index (normal weight)    | -0.0009 | 0.0025 | 0.7188   | Glycemic index (whole group) | FALSE | TRUE  | FALSE |
| cat16563171  | -0.083  | 0.0170  | Glycemic load (overweight/obese)  | -0.018  | 0.0187 | 0.5178 | Glycemic load (normal weight)     | -0.027  | 0.0141 | 0.0000   | Glycemic load (whole group)  | TRUE  | TRUE  | TRUE  |
| cat16572044  | -0.0014 | 0.0014  | Glycemic index (normal weight)    | -0.0011 | 0.0011 | 0.2800 | Glycemic index (overweight/obese) | -7.100  | 0.0009 | 0.9419   | Glycemic index (whole group) | FALSE | TRUE  | FALSE |
| cat16583193  | -0.004  | 0.0010  | Glycemic load (overweight/obese)  | 0.0009  | 0.0005 | 0.0710 | Glycemic load (normal weight)     | -0.0002 | 0.0004 | 0.6138   | Glycemic load (whole group)  | FALSE | FALSE | FALSE |
| cat16602747  | -0.0165 | 0.0038  | Glycemic load (overweight/obese)  | 0.0013  | 0.0033 | 0.6862 | Glycemic load (normal weight)     | 0.0041  | 0.0024 | 0.0986   | Glycemic load (whole group)  | TRUE  | TRUE  | TRUE  |
| cat16622906  | -0.049  | -0.0073 | Glycemic index (overweight/obese) | -0.008  | 0.0064 | 0.1298 | Glycemic index (normal weight)    | -0.011  | 0.0013 | 0.2138   | Glycemic index (whole group) | TRUE  | TRUE  | TRUE  |
| cat16644477  | -0.101  | 0.0196  | Glycemic index (normal weight)    | -0.007  | 0.0134 | 0.5958 | Glycemic index (overweight/obese) | -0.024  | 0.0111 | 0.0061   | Glycemic index (whole group) | TRUE  | TRUE  | TRUE  |
| cat16645453  | -0.0297 | 0.0067  | Glycemic load (overweight/obese)  | -0.001  | 0.0051 | 0.7172 | Glycemic load (normal weight)     | 0.0113  | 0.0042 | 0.0022   | Glycemic load (whole group)  | FALSE | TRUE  | FALSE |
| cat16655805  | -0.0682 | 0.0147  | Glycemic load (overweight/obese)  | -0.0993 | 0.0143 | 0.5146 | Glycemic load (normal weight)     | -0.0220 | 0.0118 | 0.8630   | Glycemic load (whole group)  | TRUE  | TRUE  | TRUE  |
| cat16661099  | -0.081  | 0.0161  | Glycemic load (overweight/obese)  | -0.0135 | 0.0111 | 0.2248 | Glycemic load (normal weight)     | -0.009  | 0.0095 | 0.3531   | Glycemic load (whole group)  | FALSE | TRUE  | FALSE |
| cat16681085  | -0.007  | 0.0015  | Glycemic load (overweight/obese)  | 0.0016  | 0.0008 | 0.0472 | Glycemic load (normal weight)     | 0.0006  | 0.0007 | 0.3634   | Glycemic load (whole group)  | FALSE | FALSE | FALSE |
| cat16696646  | -0.161  | 0.0354  | Glycemic index (overweight/obese) | -0.1150 | 0.0489 | 0.0188 | Glycemic index (normal weight)    | -0.060  | 0.0246 | 0.0148   | Glycemic index (whole group) | FALSE | TRUE  | FALSE |
| cat1671186   | -0.0051 | 0.0008  | Glycemic index (overweight/obese) | -0.000  | 0.0005 | 0.0005 | Glycemic index (normal weight)    | -0.0002 | 0.0002 | 0.2773   | Glycemic index (whole group) | FALSE | FALSE | FALSE |
| cat16735986  | -0.0114 | 0.0026  | Glycemic load (normal weight)     | -0.004  | 0.0015 | 0.0057 | Glycemic load (overweight/obese)  | -0.001  | 0.0013 | 0.3846   | Glycemic load (whole group)  | FALSE | FALSE | FALSE |
| cat16747922  | -0.0649 | 0.0147  | Glycemic index (normal weight)    | -0.0019 | 0.0088 | 0.8281 | Glycemic index (overweight/obese) | 0.0180  | 0.0077 | 0.0192   | Glycemic index (whole group) | TRUE  | TRUE  | TRUE  |
| cat16777780  | -0.2169 | 0.0467  | Glycemic index (overweight/obese) | 0.0194  | 0.0472 | 0.6805 | Glycemic index (normal weight)    | 0.0860  | 0.0331 | 0.0094   | Glycemic index (whole group) | TRUE  | TRUE  | TRUE  |
| cat16810217  | -0.0860 | 0.019   | Glycemic load (overweight/obese)  | -0.001  | 0.0011 | 0.1153 | Glycemic load (normal weight)     | -7.564  | 0.0010 | 0.9432   | Glycemic load (whole group)  | FALSE | FALSE | FALSE |
| cat16883132  | -0.007  | 0.0016  | Glycemic index (overweight/obese) | -0.000  | 0.0013 | 0.4052 | Glycemic index (normal weight)    | -0.002  | 0.0009 | 0.0212   | Glycemic index (whole group) | TRUE  | TRUE  | TRUE  |
| cat16989844  | -0.0116 | 0.0025  | Glycemic index (normal weight)    | -0.000  | 0.0012 | 0.5100 | Glycemic index (overweight/obese) | 0.0012  | 0.0011 | 0.2620   | Glycemic index (whole group) | FALSE | TRUE  | FALSE |
| cat17171913  | -0.0145 | 0.0029  | Glycemic index (overweight/obese) | 0.0013  | 0.0021 | 0.5156 | Glycemic index (normal weight)    | 0.0007  | 0.0013 | 0.3802   | Glycemic index (whole group) | TRUE  | TRUE  | TRUE  |
| cat17173584  | -0.0144 | 0.0014  | Glycemic load (overweight/obese)  | -0.0002 | 0.0011 | 0.2800 | Glycemic load (normal weight)     | -0.0006 | 0.0016 | 0.6997   | Glycemic load (whole group)  | FALSE | TRUE  | FALSE |
| cat17270519  | -0.033  | 0.0063  | Glycemic index (normal weight)    | 0.0049  | 0.0037 | 0.1934 | Glycemic index (overweight/obese) | -0.002  | 0.0033 | 0.4794   | Glycemic index (whole group) | FALSE | TRUE  | FALSE |
| cat17282530  | -0.222  | 0.0430  | Glycemic load (overweight/obese)  | -0.017  | 0.0552 | 0.5028 | Glycemic load (normal weight)     | -0.105  | 0.0328 | 0.0013   | Glycemic load (whole group)  | TRUE  | TRUE  | TRUE  |
| cat17289863  | -0.007  | 0.0012  | Glycemic load (overweight/obese)  | 0.0045  | 0.0018 | 0.0058 | Glycemic load (normal weight)     | 0.0012  | 0.0012 | 0.0012   | Glycemic load (whole group)  | FALSE | FALSE | FALSE |
| cat17378533  | -0.015  | 0.0032  | Glycemic load (overweight/obese)  | -0.002  | 0.0022 | 0.2421 | Glycemic load (normal weight)     | -0.004  | 0.0018 | 0.0098   | Glycemic load (whole group)  | TRUE  | TRUE  | TRUE  |
| cat17457637  | -0.314  | 0.0642  | Glycemic load (normal weight)     | -0.022  | 0.0665 | 0.7322 | Glycemic load (overweight/obese)  | -0.043  | 0.0533 | 0.4114   | Glycemic load (whole group)  | TRUE  | TRUE  | TRUE  |
| cat17566238  | -0.0111 | 0.0026  | Glycemic load (overweight/obese)  | 0.0021  | 0.0016 | 0.2091 | Glycemic load (normal weight)     | 0.0036  | 0.0012 | 0.0041   | Glycemic load (whole group)  | TRUE  | TRUE  | TRUE  |
| cat17600251  | -0.1166 | 0.0222  | Glycemic load (overweight/obese)  | -0.0320 | 0.0012 | 0.0915 | Glycemic load (normal weight)     | -0.049  | 0.0144 | 0.7333   | Glycemic load (whole group)  | FALSE | TRUE  | FALSE |
| cat17609802  | -0.0186 | 0.0041  | Glycemic load (overweight/obese)  | -0.001  | 0.0022 | 0.5573 | Glycemic load (normal weight)     | 0.0008  | 0.0019 | 0.6735   | Glycemic load (whole group)  | FALSE | TRUE  | FALSE |
| cat17747781  | -0.337  | 0.0595  | Glycemic load (overweight/obese)  | 0.0146  | 0.0612 | 0.8105 | Glycemic load (normal weight)     | -0.077  | 0.0453 | 0.0881   | Glycemic load (whole group)  | FALSE | TRUE  | FALSE |
| cat17811589  | -0.0309 | 0.0066  | Glycemic index (overweight/obese) | 0.0016  | 0.0045 | 0.7200 | Glycemic index (normal weight)    | 0.0052  | 0.0036 | 0.1548   | Glycemic index (whole group) | TRUE  | TRUE  | TRUE  |
| cat17820057  | -0.361  | 0.0572  | Glycemic index (overweight/obese) | -0.026  | 0.0589 | 0.6511 | Glycemic index (normal weight)    | -0.085  | 0.0459 | 0.0629   | Glycemic index (whole group) | TRUE  | TRUE  | TRUE  |
| cat17858316  | -0.0062 | 0.0014  | Glycemic load (overweight/obese)  | -3.493  | 0.0008 | 0.9683 | Glycemic load (normal weight)     | 0.0007  | 0.0007 | 0.3295   | Glycemic load (whole group)  | FALSE | TRUE  | FALSE |
| cat17863776  | -0.0080 | 0.0017  | Glycemic load (overweight/obese)  | -8.076  | 0.0018 | 0.9643 | Glycemic load (normal weight)     | 0.0013  | 0.0014 | 0.3316   | Glycemic load (whole group)  | FALSE | TRUE  | FALSE |
| cat18079823  | -0.2121 | 0.0470  | Glycemic load (overweight/obese)  | -0.009  | 0.0441 | 0.8242 | Glycemic load (normal weight)     | 0.0359  | 0.0340 | 0.2915   | Glycemic load (whole group)  | FALSE | TRUE  | FALSE |
| cat18200800  | -0.012  | 0.0026  | Glycemic index (overweight/obese) | 0.0022  | 0.0023 | 0.3529 | Glycemic index (normal weight)    | -0.0002 | 0.0018 | 0.9014   | Glycemic index (whole group) | FALSE | TRUE  | FALSE |
| cat18265311  | -0.0085 | 0.0015  | Glycemic index (overweight/obese) | -0.000  | 0.0010 | 0.4694 | Glycemic index (normal weight)    | 0.0002  | 0.0009 | 0.7804   | Glycemic index (whole group) | FALSE | TRUE  | FALSE |
| cat18411811  | -0.007  | 0.0011  | Glycemic index (overweight/obese) | -0.001  | 0.0009 | 0.6465 | Glycemic index (normal weight)    | -0.003  | 0.0007 | 0.0059   | Glycemic index (whole group) | TRUE  | TRUE  | TRUE  |
| cat18503679  | -0.0108 | 0.0023  | Glycemic index (overweight/obese) | -0.0005 | 0.0009 | 0.5759 | Glycemic index (normal weight)    | 0.0021  | 0.0009 | 0.0170   | Glycemic index (whole group) | TRUE  | TRUE  | TRUE  |
| cat18581746  | -0.0276 | 0.0062  | Glycemic load (overweight/obese)  | -0.000  | 0.0057 | 0.9390 | Glycemic load (normal weight)     | 0.0041  | 0.0049 | 0.4052   | Glycemic load (whole group)  | FALSE | TRUE  | FALSE |
| cat18592561  | -0.027  | 0.0052  | Glycemic load (overweight/obese)  | -0.004  | 0.0036 | 0.2678 | Glycemic load (normal weight)     | -0.008  | 0.0029 | 0.0042   | Glycemic load (whole group)  | TRUE  | TRUE  | TRUE  |
| cat18610053  | -0.0077 | 0.0013  | Glycemic load (overweight/obese)  | -0.001  | 0.0006 | 0.0054 | Glycemic load (normal weight)     | -0.0002 | 0.0005 | 0.0255   | Glycemic load (whole group)  | FALSE | FALSE | FALSE |
| cat18720125  | -0.060  | 0.0112  | Glycemic load (overweight/obese)  | -0.013  | 0.0154 | 0.3905 | Glycemic load (normal weight)     | -0.037  | 0.0110 | 0.0007   | Glycemic load (whole group)  | TRUE  | TRUE  | TRUE  |
| cat18816665  | -0.010  | 0.0023  | Glycemic load (overweight/obese)  | 0.0005  | 0.0014 | 0.7439 | Glycemic load (normal weight)     | -0.001  | 0.0012 | 0.5591   | Glycemic load (whole group)  | FALSE | TRUE  | FALSE |
| cat18840037  | -0.054  | 0.0102  | Glycemic index (overweight/obese) | -0.007  | 0.0115 | 0.3379 | Glycemic index (normal weight)    | -0.009  | 0.0089 | 0.2705   | Glycemic index (whole group) | TRUE  | TRUE  | TRUE  |
| cat18859813  | -0.0125 | 0.0025  | Glycemic index (normal weight)    | -0.001  | 0.0021 | 0.3622 | Glycemic index (overweight/obese) | 0.0017  | 0.0015 | 0.2601   | Glycemic index (whole group) | FALSE | TRUE  | FALSE |
| cat18949521  | -0.0090 | 0.0015  | Glycemic index (normal weight)    | -0.000  | 0.0013 | 0.6865 | Glycemic index (overweight/obese) | 0.0003  | 0.0010 | 0.7663   | Glycemic index (whole group) | FALSE | TRUE  | FALSE |
| cat19004775  | -0.0492 | 0.0111  | Glycemic load (overweight/obese)  | 0.0039  | 0.0080 | 0.6230 |                                   |         |        |          |                              |       |       |       |



|            |         |        |                                   |        |        |        |                                   |         |        |          |                              |       |       |       |
|------------|---------|--------|-----------------------------------|--------|--------|--------|-----------------------------------|---------|--------|----------|------------------------------|-------|-------|-------|
| cg1989895  | -0.138  | 0.0303 | Glycemic load (overweight)/obese  | -0.015 | 0.0566 | 0.7783 | Glycemic load (normal weight)     | -0.072  | 0.0254 | 0.0942   | Glycemic load (whole group)  | TRUE  | TRUE  | TRUE  |
| cg2095985  | -0.003  | 0.0006 | Glycemic load (overweight)/obese  | 0.0026 | 0.0013 | 0.0509 | Glycemic load (normal weight)     | -0.002  | 0.0006 | 0.20e-05 | Glycemic load (whole group)  | FALSE | TRUE  | FALSE |
| cg20101413 | 0.1788  | 0.0003 | Glycemic load (overweight)/obese  | 0.0050 | 0.0003 | 0.0509 | Glycemic load (normal weight)     | 0.000   | 0.000  | 0.0514   | Glycemic load (whole group)  | TRUE  | TRUE  | TRUE  |
| cg2024287  | 0.0122  | 0.0025 | Glycemic load (overweight)/obese  | 0.0034 | 0.0015 | 0.0272 | Glycemic load (normal weight)     | 0.0040  | 0.0013 | 0.0028   | Glycemic load (whole group)  | TRUE  | TRUE  | TRUE  |
| cg2031944  | -0.073  | 0.0160 | Glycemic load (overweight)/obese  | 0.0009 | 0.0116 | 0.9335 | Glycemic load (normal weight)     | -0.014  | 0.0101 | 0.1412   | Glycemic load (whole group)  | FALSE | TRUE  | FALSE |
| cg2054785  | 0.0551  | 0.0088 | Glycemic load (overweight)/obese  | -0.002 | 0.0002 | 0.4999 | Glycemic load (normal weight)     | -0.003  | 0.0005 | 0.0003   | Glycemic load (whole group)  | FALSE | TRUE  | FALSE |
| cg20613160 | 0.0174  | 0.0034 | Glycemic load (overweight)/obese  | 0.0018 | 0.0022 | 0.4140 | Glycemic load (normal weight)     | 0.0039  | 0.0019 | 0.0378   | Glycemic load (whole group)  | TRUE  | TRUE  | TRUE  |
| cg20641660 | 0.0077  | 0.0014 | Glycemic load (overweight)/obese  | -0.000 | 0.0007 | 0.3073 | Glycemic load (normal weight)     | 0.0001  | 0.0006 | 0.8248   | Glycemic load (whole group)  | FALSE | TRUE  | FALSE |
| cg20715159 | 0.2458  | 0.0514 | Glycemic load (overweight)/obese  | 0.0378 | 0.0633 | 0.5503 | Glycemic load (normal weight)     | 0.1258  | 0.0350 | 0.0003   | Glycemic load (whole group)  | TRUE  | TRUE  | TRUE  |
| cg20775162 | 0.1932  | 0.0419 | Glycemic load (overweight)/obese  | -0.019 | 0.0332 | 0.5592 | Glycemic load (normal weight)     | 0.0298  | 0.0301 | 0.1226   | Glycemic load (whole group)  | FALSE | TRUE  | FALSE |
| cg20785459 | -0.0133 | 0.0024 | Glycemic load (overweight)/obese  | -0.000 | 0.0016 | 0.6570 | Glycemic load (normal weight)     | 0.0006  | 0.0013 | 0.6565   | Glycemic load (whole group)  | FALSE | TRUE  | FALSE |
| cg20798124 | 0.0351  | 0.0071 | Glycemic index (overweight)/obese | -0.001 | 0.0047 | 0.7163 | Glycemic index (normal weight)    | 0.0018  | 0.0041 | 0.6502   | Glycemic index (whole group) | FALSE | TRUE  | FALSE |
| cg20885078 | 0.0235  | 0.0053 | Glycemic index (overweight)/obese | -0.001 | 0.0050 | 0.8171 | Glycemic index (normal weight)    | 0.0047  | 0.0036 | 0.3105   | Glycemic index (whole group) | FALSE | TRUE  | FALSE |
| cg20885621 | 0.1096  | 0.0117 | Glycemic index (overweight)/obese | 0.0131 | 0.0283 | 0.6425 | Glycemic index (normal weight)    | 0.0065  | 0.0104 | 0.0596   | Glycemic index (whole group) | TRUE  | TRUE  | TRUE  |
| cg20926120 | 0.0065  | 0.0012 | Glycemic index (overweight)/obese | 0.0012 | 0.0008 | 0.1180 | Glycemic index (normal weight)    | 0.0019  | 0.0006 | 0.0054   | Glycemic index (whole group) | TRUE  | TRUE  | TRUE  |
| cg20938391 | -0.327  | 0.0697 | Glycemic index (overweight)/obese | -0.166 | 0.0923 | 0.0719 | Glycemic index (normal weight)    | -0.172  | 0.0583 | 0.0031   | Glycemic index (whole group) | TRUE  | TRUE  | TRUE  |
| cg20945602 | -0.020  | 0.0039 | Glycemic index (overweight)/obese | 0.018  | 0.0120 | 0.1232 | Glycemic index (normal weight)    | -0.019  | 0.0037 | 2.33e-07 | Glycemic index (whole group) | TRUE  | TRUE  | TRUE  |
| cg21000277 | 0.0149  | 0.0024 | Glycemic index (overweight)/obese | -0.001 | 0.0027 | 0.5581 | Glycemic index (normal weight)    | 0.0006  | 0.0016 | 0.7137   | Glycemic index (whole group) | FALSE | TRUE  | FALSE |
| cg21081175 | 0.0160  | 0.0032 | Glycemic index (normal weight)    | 0.0031 | 0.0023 | 0.1882 | Glycemic index (overweight)/obese | 0.0046  | 0.0023 | 0.0467   | Glycemic index (whole group) | TRUE  | TRUE  | TRUE  |
| cg21155673 | 0.0320  | 0.0059 | Glycemic load (overweight)/obese  | -0.000 | 0.0080 | 0.9489 | Glycemic load (normal weight)     | 0.0003  | 0.0060 | 0.9492   | Glycemic load (whole group)  | FALSE | TRUE  | FALSE |
| cg21170324 | 0.0418  | 0.0096 | Glycemic load (overweight)/obese  | -0.001 | 0.0062 | 0.7526 | Glycemic load (normal weight)     | 0.0063  | 0.0054 | 0.2408   | Glycemic load (whole group)  | FALSE | TRUE  | FALSE |
| cg21189242 | -0.050  | 0.0103 | Glycemic load (overweight)/obese  | -0.002 | 0.0151 | 0.8695 | Glycemic load (normal weight)     | -0.007  | 0.0083 | 0.3802   | Glycemic load (whole group)  | TRUE  | TRUE  | TRUE  |
| cg21248089 | 0.2139  | 0.0472 | Glycemic load (overweight)/obese  | -0.032 | 0.0671 | 0.6321 | Glycemic load (normal weight)     | 0.1204  | 0.0387 | 0.0018   | Glycemic load (whole group)  | FALSE | TRUE  | FALSE |
| cg21232819 | 0.0467  | 0.0102 | Glycemic index (overweight)/obese | 0.010  | 0.0118 | 0.3827 | Glycemic index (normal weight)    | 0.0238  | 0.0080 | 0.0030   | Glycemic index (whole group) | FALSE | TRUE  | FALSE |
| cg21339736 | 0.0870  | 0.0193 | Glycemic load (overweight)/obese  | -0.020 | 0.0168 | 0.2291 | Glycemic load (normal weight)     | -0.001  | 0.0136 | 0.9367   | Glycemic load (whole group)  | FALSE | FALSE | FALSE |
| cg21420674 | -0.146  | 0.0316 | Glycemic load (overweight)/obese  | 0.0090 | 0.0321 | 0.7780 | Glycemic load (normal weight)     | -0.021  | 0.0236 | 0.3599   | Glycemic load (whole group)  | FALSE | TRUE  | FALSE |
| cg21462596 | 0.0447  | 0.0100 | Glycemic load (overweight)/obese  | -0.009 | 0.0091 | 0.3096 | Glycemic load (normal weight)     | 0.0057  | 0.0069 | 0.4109   | Glycemic load (whole group)  | FALSE | TRUE  | FALSE |
| cg21463340 | -0.244  | 0.0494 | Glycemic load (overweight)/obese  | -0.004 | 0.0460 | 0.4005 | Glycemic load (normal weight)     | -0.012  | 0.0412 | 0.1866   | Glycemic load (whole group)  | FALSE | TRUE  | FALSE |
| cg21666867 | -0.006  | 0.0013 | Glycemic load (overweight)/obese  | -0.004 | 0.0038 | 0.2043 | Glycemic load (normal weight)     | -0.005  | 0.0014 | 0.0003   | Glycemic load (whole group)  | TRUE  | TRUE  | TRUE  |
| cg21788902 | 0.0893  | 0.0177 | Glycemic index (overweight)/obese | -0.005 | 0.0208 | 0.7916 | Glycemic index (normal weight)    | 0.0066  | 0.0129 | 0.6086   | Glycemic index (whole group) | FALSE | TRUE  | FALSE |
| cg21792018 | 0.0086  | 0.0019 | Glycemic index (overweight)/obese | -0.000 | 0.0009 | 0.7565 | Glycemic index (normal weight)    | 0.0015  | 0.0009 | 0.0023   | Glycemic index (whole group) | FALSE | TRUE  | FALSE |
| cg21813747 | -0.025  | 0.0068 | Glycemic index (overweight)/obese | -0.003 | 0.0040 | 0.3343 | Glycemic index (normal weight)    | -0.008  | 0.0033 | 0.0083   | Glycemic index (whole group) | TRUE  | TRUE  | TRUE  |
| cg21895546 | 0.5461  | 0.0779 | Glycemic index (normal weight)    | -0.040 | 0.1470 | 0.7851 | Glycemic index (overweight)/obese | 0.0207  | 0.0986 | 0.8330   | Glycemic index (whole group) | FALSE | TRUE  | FALSE |
| cg21900799 | -0.057  | 0.0118 | Glycemic index (normal weight)    | -0.005 | 0.0077 | 0.4717 | Glycemic index (overweight)/obese | -0.016  | 0.0064 | 0.0303   | Glycemic index (whole group) | TRUE  | TRUE  | TRUE  |
| cg21981249 | 0.0411  | 0.0086 | Glycemic load (overweight)/obese  | 0.0062 | 0.0062 | 0.3212 | Glycemic load (normal weight)     | 0.0062  | 0.0068 | 0.0296   | Glycemic load (whole group)  | TRUE  | TRUE  | TRUE  |
| cg21964391 | 0.0058  | 0.0013 | Glycemic load (overweight)/obese  | 0.0019 | 0.0012 | 0.1247 | Glycemic load (normal weight)     | 0.0021  | 0.0010 | 0.0448   | Glycemic load (whole group)  | TRUE  | TRUE  | TRUE  |
| cg22066867 | 0.0167  | 0.0034 | Glycemic index (overweight)/obese | 0.0009 | 0.0020 | 0.6479 | Glycemic index (normal weight)    | 0.0035  | 0.0017 | 0.0498   | Glycemic index (whole group) | TRUE  | TRUE  | TRUE  |
| cg22097891 | 0.1019  | 0.0226 | Glycemic load (overweight)/obese  | 0.0122 | 0.0184 | 0.5077 | Glycemic load (normal weight)     | 0.0412  | 0.0144 | 0.0043   | Glycemic load (whole group)  | TRUE  | TRUE  | TRUE  |
| cg22110973 | -0.200  | 0.0451 | Glycemic index (overweight)/obese | 0.0048 | 0.0099 | 0.8099 | Glycemic index (normal weight)    | -0.031  | 0.0284 | 0.2623   | Glycemic index (whole group) | FALSE | TRUE  | FALSE |
| cg22138408 | -0.037  | 0.0071 | Glycemic load (overweight)/obese  | -0.004 | 0.0102 | 0.9193 | Glycemic load (normal weight)     | -0.009  | 0.0067 | 0.1669   | Glycemic load (whole group)  | TRUE  | TRUE  | TRUE  |
| cg22248988 | 0.2063  | 0.0450 | Glycemic load (overweight)/obese  | -0.005 | 0.0339 | 0.9163 | Glycemic load (normal weight)     | 0.0758  | 0.0367 | 0.0392   | Glycemic load (whole group)  | FALSE | TRUE  | FALSE |
| cg22349310 | -0.078  | 0.0140 | Glycemic load (overweight)/obese  | 0.0149 | 0.0128 | 0.1329 | Glycemic load (normal weight)     | -0.021  | 0.0135 | 0.1143   | Glycemic load (whole group)  | FALSE | TRUE  | FALSE |
| cg22460923 | 0.2324  | 0.0334 | Glycemic load (overweight)/obese  | 0.0280 | 0.0413 | 0.4976 | Glycemic load (normal weight)     | 0.0685  | 0.0264 | 0.0095   | Glycemic load (whole group)  | TRUE  | TRUE  | TRUE  |
| cg22465293 | 0.0285  | 0.0062 | Glycemic index (overweight)/obese | 0.0015 | 0.0036 | 0.6725 | Glycemic index (normal weight)    | 0.0049  | 0.0033 | 0.1308   | Glycemic index (whole group) | TRUE  | TRUE  | TRUE  |
| cg22530061 | 0.0200  | 0.0043 | Glycemic load (overweight)/obese  | 0.0003 | 0.0028 | 0.9550 | Glycemic load (normal weight)     | 0.0016  | 0.0023 | 0.4936   | Glycemic load (whole group)  | TRUE  | TRUE  | TRUE  |
| cg2255440  | 0.0153  | 0.0030 | Glycemic load (overweight)/obese  | -0.001 | 0.0027 | 0.4747 | Glycemic load (normal weight)     | 0.0007  | 0.0024 | 0.7543   | Glycemic load (whole group)  | FALSE | TRUE  | FALSE |
| cg22565399 | 0.0058  | 0.0013 | Glycemic index (normal weight)    | 0.0014 | 0.0007 | 0.6522 | Glycemic index (overweight)/obese | 0.0016  | 0.0006 | 0.0114   | Glycemic index (whole group) | TRUE  | TRUE  | TRUE  |
| cg22647970 | -0.025  | 0.0054 | Glycemic load (overweight)/obese  | 0.0064 | 0.0034 | 0.0550 | Glycemic load (normal weight)     | 7.0882  | 0.0029 | 0.9810   | Glycemic load (whole group)  | FALSE | FALSE | FALSE |
| cg22681041 | -0.048  | 0.0099 | Glycemic load (overweight)/obese  | -0.007 | 0.0101 | 0.0085 | Glycemic load (normal weight)     | -0.019  | 0.0149 | 0.0085   | Glycemic load (whole group)  | TRUE  | TRUE  | TRUE  |
| cg2287970  | 0.0202  | 0.0040 | Glycemic load (overweight)/obese  | 0.0034 | 0.0025 | 0.3373 | Glycemic load (normal weight)     | 0.0089  | 0.0033 | 0.0080   | Glycemic load (whole group)  | TRUE  | TRUE  | TRUE  |
| cg23021153 | 0.0157  | 0.0032 | Glycemic load (overweight)/obese  | -0.001 | 0.0018 | 0.3983 | Glycemic load (normal weight)     | 0.0012  | 0.0018 | 0.4929   | Glycemic load (whole group)  | FALSE | TRUE  | FALSE |
| cg23120601 | -0.056  | 0.0119 | Glycemic load (overweight)/obese  | 0.0068 | 0.0162 | 0.6746 | Glycemic load (normal weight)     | -0.094  | 0.0136 | 0.3024   | Glycemic load (whole group)  | FALSE | TRUE  | FALSE |
| cg23229584 | 0.0470  | 0.0109 | Glycemic load (overweight)/obese  | 0.0114 | 0.0232 | 0.0114 | Glycemic load (normal weight)     | 0.0264  | 0.0072 | 0.0072   | Glycemic load (whole group)  | FALSE | TRUE  | FALSE |
| cg23237607 | -0.191  | 0.0391 | Glycemic load (normal weight)     | 0.0386 | 0.0483 | 0.4242 | Glycemic load (overweight)/obese  | 0.0237  | 0.0352 | 0.5000   | Glycemic load (whole group)  | FALSE | FALSE | FALSE |
| cg23239239 | -0.067  | 0.0144 | Glycemic index (overweight)/obese | 0.0239 | 0.0115 | 0.0379 | Glycemic index (normal weight)    | 0.0028  | 0.0097 | 0.7177   | Glycemic index (whole group) | FALSE | FALSE | FALSE |
| cg23264059 | -0.035  | 0.0099 | Glycemic load (overweight)/obese  | -0.005 | 0.0053 | 0.1366 | Glycemic load (normal weight)     | -0.004  | 0.0044 | 0.1143   | Glycemic load (whole group)  | TRUE  | TRUE  | TRUE  |
| cg23325278 | -0.039  | 0.0092 | Glycemic index (overweight)/obese | 0.000  | 0.0060 | 0.8656 | Glycemic index (normal weight)    | -0.008  | 0.0053 | 0.1354   | Glycemic index (whole group) | TRUE  | TRUE  | TRUE  |
| cg23427404 | 0.4742  | 0.0993 | Glycemic load (overweight)/obese  | 0.0519 | 0.1189 | 0.6622 | Glycemic load (normal weight)     | 0.1685  | 0.0743 | 0.0233   | Glycemic load (whole group)  | TRUE  | TRUE  | TRUE  |
| cg23513183 | -0.024  | 0.0051 | Glycemic load (overweight)/obese  | 0.0039 | 0.0043 | 0.3615 | Glycemic load (normal weight)     | -0.002  | 0.0035 | 0.4128   | Glycemic load (whole group)  | FALSE | TRUE  | FALSE |
| cg23541273 | 0.1692  | 0.0373 | Glycemic index (overweight)/obese | 0.0387 | 0.0482 | 0.4020 | Glycemic index (normal weight)    | 0.1194  | 0.0344 | 0.0005   | Glycemic index (whole group) | TRUE  | TRUE  | TRUE  |
| cg23562160 | -0.030  | 0.0066 | Glycemic load (overweight)/obese  | -0.004 | 0.0046 | 0.3461 | Glycemic load (normal weight)     | -0.007  | 0.0034 | 0.0402   | Glycemic load (whole group)  | TRUE  | TRUE  | TRUE  |
| cg23605244 | 0.2230  | 0.0405 | Glycemic load (overweight)/obese  | 0.0210 | 0.0663 | 0.7513 | Glycemic load (normal weight)     | 0.1145  | 0.0346 | 0.0009   | Glycemic load (whole group)  | TRUE  | TRUE  | TRUE  |
| cg23632178 | 0.0249  | 0.0044 | Glycemic load (overweight)/obese  | -0.000 | 0.0032 | 0.8283 | Glycemic load (normal weight)     | 0.0042  | 0.0026 | 0.1164   | Glycemic load (whole group)  | FALSE | TRUE  | FALSE |
| cg23674806 | 0.0542  | 0.0109 | Glycemic load (overweight)/obese  | -0.021 | 0.0155 | 0.1702 | Glycemic load (normal weight)     | 0.0017  | 0.0114 | 0.7425   | Glycemic load (whole group)  | FALSE | TRUE  | FALSE |
| cg23803838 | 0.0168  | 0.0038 | Glycemic load (overweight)/obese  | -0.000 | 0.0019 | 0.9433 | Glycemic load (normal weight)     | 0.0018  | 0.0017 | 0.2927   | Glycemic load (whole group)  | FALSE | TRUE  | FALSE |
| cg23811160 | 0.2226  | 0.0490 | Glycemic load (overweight)/obese  | 0.0883 | 0.0792 | 0.2908 | Glycemic load (normal weight)     | 0.0312  | 0.0424 | 0.4626   | Glycemic load (whole group)  | FALSE | TRUE  | FALSE |
| cg23889772 | -0.141  | 0.0296 | Glycemic load (overweight)/obese  | 0.007  | 0.0244 | 0.7524 | Glycemic load (normal weight)     | -0.034  | 0.0203 | 0.3558   | Glycemic load (whole group)  | TRUE  | TRUE  | TRUE  |
| cg23928104 | -0.195  | 0.0425 | Glycemic index (normal weight)    | -0.018 | 0.0611 | 0.7656 | Glycemic index (overweight)/obese | -0.023  | 0.0419 | 0.5727   | Glycemic index (whole group) | TRUE  | TRUE  | TRUE  |
| cg23979520 | 0.0158  | 0.0034 | Glycemic load (overweight)/obese  | -0.000 | 0.0017 | 0.6593 | Glycemic load (normal weight)     | 0.0013  | 0.0014 | 0.3641   | Glycemic load (whole group)  | FALSE | TRUE  | FALSE |
| cg23979983 | 0.2129  | 0.0401 | Glycemic index (overweight)/obese | -0.041 | 0.0649 | 0.5212 | Glycemic index (normal weight)    | 0.0337  | 0.0446 | 0.4497   | Glycemic index (whole group) | FALSE | TRUE  | FALSE |
| cg24040966 | -0.008  | 0.0019 | Glycemic index (normal weight)    | 0.0001 | 0.0009 | 0.8720 | Glycemic index (overweight)/obese | -0.0008 | 0.0009 | 0.5529   | Glycemic index (whole group) | FALSE | TRUE  | FALSE |
| cg24057041 | 0.0099  | 0.0020 | Glycemic index (normal weight)    | -0.000 | 0.0010 | 0.4564 | Glycemic index (overweight)/obese | 0.0018  | 0.0009 | 0.6607   | Glycemic index (whole group) | FALSE | TRUE  | FALSE |
| cg24065451 | -0.017  | 0.0033 | Glycemic load (overweight)/obese  | 0.0010 | 0.0027 | 0.7081 | Glycemic load (normal weight)     | -0.002  | 0.0021 | 0.2994   | Glycemic load (whole group)  | FALSE | TRUE  | FALSE |
| cg24071676 | -0.011  | 0.0027 | Glycemic load (overweight)/obese  | -0.003 | 0.0015 | 0.3654 | Glycemic load (normal weight)     | -0.003  | 0.0012 | 0.0168   | Glycemic load (whole group)  | TRUE  | TRUE  | TRUE  |
| cg24104567 | -0.010  | 0.0021 | Glycemic load (normal weight)     | 0.0001 | 0.0015 | 0.9025 | Glycemic load (overweight)/obese  | -0.0006 | 0.0012 | 0.6782   | Glycemic load (whole group)  | FALSE | TRUE  | FALSE |
| cg24128843 | 0.0092  | 0.0019 | Glycemic index (overweight)/obese | -0.000 | 0.0015 | 0.6317 | Glycemic index (normal weight)    | 0.0009  | 0.0012 | 0.4679   | Glycemic index (whole group) | FALSE | TRUE  |       |

|            |        |        |                                   |          |        |        |                                   |        |        |          |                              |       |       |       |
|------------|--------|--------|-----------------------------------|----------|--------|--------|-----------------------------------|--------|--------|----------|------------------------------|-------|-------|-------|
| cg25367568 | 0.0133 | 0.0030 | Glycemic index (normal weight)    | -0.006   | 0.0023 | 0.0038 | Glycemic index (overweight/obese) | -0.003 | 0.0018 | 0.0779   | Glycemic index (whole group) | FALSE | FALSE | FALSE |
| cg25446789 | 0.1918 | 0.0419 | Glycemic index (normal weight)    | -0.031   | 0.0335 | 0.3498 | Glycemic index (overweight/obese) | 0.0621 | 0.0271 | 0.0219   | Glycemic index (whole group) | FALSE | TRUE  | FALSE |
| cg25492421 | 0.0075 | 0.0012 | Glycemic index (overweight/obese) | 0.0019   | 0.0010 | 0.0566 | Glycemic index (normal weight)    | 0.0005 | 0.0009 | 0.0065   | Glycemic index (whole group) | TRUE  | TRUE  | TRUE  |
| cg25496104 | -0.101 | 0.0216 | Glycemic load (overweight/obese)  | -0.021   | 0.0164 | 0.1927 | Glycemic load (normal weight)     | -0.042 | 0.0130 | 0.0010   | Glycemic load (whole group)  | TRUE  | TRUE  | TRUE  |
| cg25603927 | 0.3672 | 0.0699 | Glycemic load (overweight/obese)  | 0.0003   | 0.0590 | 0.9558 | Glycemic load (normal weight)     | 0.0166 | 0.0453 | 0.7145   | Glycemic load (whole group)  | TRUE  | TRUE  | TRUE  |
| cg25607360 | 0.0492 | 0.0102 | Glycemic load (normal weight)     | -0.011   | 0.0082 | 0.1798 | Glycemic load (overweight/obese)  | 0.0008 | 0.0067 | 0.9017   | Glycemic load (whole group)  | FALSE | TRUE  | FALSE |
| cg25800356 | 0.0043 | 0.0008 | Glycemic load (overweight/obese)  | -0.000   | 0.0032 | 0.9318 | Glycemic load (normal weight)     | 0.0006 | 0.0008 | 1.15e-05 | Glycemic load (whole group)  | FALSE | TRUE  | FALSE |
| cg25852019 | -0.068 | 0.0148 | Glycemic index (overweight/obese) | -0.007   | 0.0148 | 0.6223 | Glycemic index (normal weight)    | -0.016 | 0.0105 | 0.1181   | Glycemic index (whole group) | TRUE  | TRUE  | TRUE  |
| cg25882643 | 0.0546 | 0.0108 | Glycemic load (overweight/obese)  | 0.0504   | 0.0179 | 0.0050 | Glycemic load (normal weight)     | 0.0254 | 0.0103 | 0.0137   | Glycemic load (whole group)  | TRUE  | TRUE  | TRUE  |
| cg25914824 | 0.0863 | 0.0179 | Glycemic index (normal weight)    | 0.0055   | 0.0157 | 0.7159 | Glycemic index (overweight/obese) | 0.0265 | 0.0115 | 0.0211   | Glycemic index (whole group) | TRUE  | TRUE  | TRUE  |
| cg25938010 | -0.009 | 0.0021 | Glycemic load (overweight/obese)  | 0.0005   | 0.0014 | 0.6781 | Glycemic load (normal weight)     | -0.000 | 0.0011 | 0.5008   | Glycemic load (whole group)  | FALSE | TRUE  | FALSE |
| cg25970491 | 0.0290 | 0.0005 | Glycemic load (overweight/obese)  | -0.005   | 0.0059 | 0.3558 | Glycemic load (normal weight)     | -0.002 | 0.0047 | 0.5899   | Glycemic load (whole group)  | FALSE | FALSE | FALSE |
| cg26307055 | -0.036 | 0.0075 | Glycemic load (overweight/obese)  | -0.004   | 0.0067 | 0.4818 | Glycemic load (normal weight)     | -0.010 | 0.0050 | 0.0403   | Glycemic load (whole group)  | TRUE  | TRUE  | TRUE  |
| cg26112901 | -0.024 | 0.0009 | Glycemic load (overweight/obese)  | -0.000   | 0.0006 | 0.7579 | Glycemic load (normal weight)     | -0.000 | 0.0005 | 0.1847   | Glycemic load (whole group)  | TRUE  | TRUE  | TRUE  |
| cg26132518 | -0.164 | 0.0366 | Glycemic load (overweight/obese)  | 0.0040   | 0.0262 | 0.8785 | Glycemic load (normal weight)     | -0.052 | 0.0216 | 0.0155   | Glycemic load (whole group)  | FALSE | TRUE  | FALSE |
| cg26153425 | -0.274 | 0.0452 | Glycemic load (overweight/obese)  | -0.067   | 0.0651 | 0.3019 | Glycemic load (normal weight)     | -0.089 | 0.0449 | 0.0663   | Glycemic load (whole group)  | TRUE  | TRUE  | TRUE  |
| cg26272214 | -0.041 | 0.0078 | Glycemic index (overweight/obese) | -0.001   | 0.0054 | 0.7956 | Glycemic index (normal weight)    | -0.005 | 0.0042 | 0.7201   | Glycemic index (whole group) | TRUE  | TRUE  | TRUE  |
| cg26300597 | -0.029 | 0.0066 | Glycemic load (overweight/obese)  | -0.001   | 0.0048 | 0.7756 | Glycemic load (normal weight)     | -0.005 | 0.0040 | 0.1427   | Glycemic load (whole group)  | TRUE  | TRUE  | TRUE  |
| cg26474270 | -0.009 | 0.0018 | Glycemic load (overweight/obese)  | -0.000   | 0.0013 | 0.5426 | Glycemic load (normal weight)     | -0.002 | 0.0011 | 0.0195   | Glycemic load (whole group)  | TRUE  | TRUE  | TRUE  |
| cg26502715 | 0.1221 | 0.0270 | Glycemic index (normal weight)    | -0.000   | 0.0231 | 0.9826 | Glycemic index (overweight/obese) | 0.0180 | 0.0180 | 0.1171   | Glycemic index (whole group) | FALSE | TRUE  | FALSE |
| cg26509119 | 0.0067 | 0.0015 | Glycemic load (overweight/obese)  | -0.002   | 0.0013 | 0.0347 | Glycemic load (normal weight)     | -0.000 | 0.0010 | 0.8079   | Glycemic load (whole group)  | FALSE | FALSE | FALSE |
| cg26649688 | -0.006 | 0.0014 | Glycemic load (overweight/obese)  | 0.0010   | 0.0016 | 0.5194 | Glycemic load (normal weight)     | -0.001 | 0.0012 | 0.1610   | Glycemic load (whole group)  | FALSE | TRUE  | FALSE |
| cg26708920 | -0.404 | 0.0797 | Glycemic load (overweight/obese)  | -0.081   | 0.0801 | 0.3075 | Glycemic load (normal weight)     | -0.126 | 0.0566 | 0.0260   | Glycemic load (whole group)  | TRUE  | TRUE  | TRUE  |
| cg27039257 | 0.3124 | 0.0644 | Glycemic load (overweight/obese)  | 0.0401   | 0.0984 | 0.4838 | Glycemic load (normal weight)     | 0.0670 | 0.0550 | 0.2226   | Glycemic load (whole group)  | TRUE  | TRUE  | TRUE  |
| cg27070405 | 0.2363 | 0.0513 | Glycemic load (overweight/obese)  | -0.025   | 0.0771 | 0.7441 | Glycemic load (normal weight)     | 0.0342 | 0.0447 | 0.4439   | Glycemic load (whole group)  | FALSE | TRUE  | FALSE |
| cg27084781 | 0.0268 | 0.0059 | Glycemic index (overweight/obese) | -0.009   | 0.0052 | 0.0582 | Glycemic index (normal weight)    | -0.001 | 0.0046 | 0.7371   | Glycemic index (whole group) | FALSE | FALSE | FALSE |
| cg27120437 | -0.056 | 0.0131 | Glycemic index (overweight/obese) | -0.027   | 0.0112 | 0.0146 | Glycemic index (normal weight)    | -0.035 | 0.0088 | 5.32e-05 | Glycemic index (whole group) | TRUE  | TRUE  | TRUE  |
| cg27212192 | 0.0126 | 0.0028 | Glycemic load (normal weight)     | 9.28e-05 | 0.0013 | 0.9467 | Glycemic load (overweight/obese)  | 0.0013 | 0.0012 | 0.3693   | Glycemic load (whole group)  | TRUE  | TRUE  | TRUE  |
| cg27254338 | 0.0198 | 0.0043 | Glycemic load (overweight/obese)  | 0.0020   | 0.0039 | 0.6042 | Glycemic load (normal weight)     | 0.0038 | 0.0031 | 0.2266   | Glycemic load (whole group)  | TRUE  | TRUE  | TRUE  |
| cg27260684 | 0.0195 | 0.0033 | Glycemic load (overweight/obese)  | 0.0025   | 0.0042 | 0.5538 | Glycemic load (normal weight)     | 0.0048 | 0.0030 | 0.1148   | Glycemic load (whole group)  | TRUE  | TRUE  | TRUE  |
| cg27284024 | 0.0218 | 0.0044 | Glycemic index (overweight/obese) | 0.0005   | 0.0036 | 0.4732 | Glycemic index (normal weight)    | 0.0059 | 0.0031 | 0.0550   | Glycemic index (whole group) | TRUE  | TRUE  | TRUE  |
| cg27302237 | 0.2501 | 0.0544 | Glycemic index (overweight/obese) | 0.0735   | 0.0518 | 0.1557 | Glycemic index (normal weight)    | 0.1158 | 0.0351 | 0.0006   | Glycemic index (whole group) | TRUE  | TRUE  | TRUE  |
| cg27367526 | 0.2191 | 0.0451 | Glycemic load (overweight/obese)  | -0.036   | 0.0342 | 0.2841 | Glycemic load (normal weight)     | 0.0222 | 0.0291 | 0.4451   | Glycemic load (whole group)  | FALSE | TRUE  | FALSE |
| cg27386718 | 0.1283 | 0.0276 | Glycemic load (overweight/obese)  | 0.0544   | 0.0234 | 0.0202 | Glycemic load (normal weight)     | 0.0701 | 0.0169 | 3.52e-05 | Glycemic load (whole group)  | TRUE  | TRUE  | TRUE  |
| cg27393390 | 0.0860 | 0.0167 | Glycemic index (normal weight)    | -0.007   | 0.0127 | 0.5642 | Glycemic index (overweight/obese) | 0.0138 | 0.0098 | 0.1619   | Glycemic index (whole group) | FALSE | TRUE  | FALSE |
| cg27412523 | -0.130 | 0.0272 | Glycemic load (overweight/obese)  | -0.006   | 0.0421 | 0.8784 | Glycemic load (normal weight)     | -0.036 | 0.0248 | 0.1373   | Glycemic load (whole group)  | TRUE  | TRUE  | TRUE  |
| cg27421105 | -0.177 | 0.0373 | Glycemic index (overweight/obese) | 0.0437   | 0.0321 | 0.1734 | Glycemic index (normal weight)    | -0.057 | 0.0254 | 0.0222   | Glycemic index (whole group) | FALSE | TRUE  | FALSE |
| cg27425709 | 0.0063 | 0.0013 | Glycemic index (overweight/obese) | 0.0002   | 0.0010 | 0.8031 | Glycemic index (normal weight)    | 0.0006 | 0.0008 | 0.4246   | Glycemic index (whole group) | TRUE  | TRUE  | TRUE  |
| cg27491277 | 0.0102 | 0.0020 | Glycemic index (overweight/obese) | -0.000   | 0.0020 | 0.6561 | Glycemic index (normal weight)    | 0.0013 | 0.0015 | 0.3828   | Glycemic index (whole group) | FALSE | TRUE  | FALSE |
| cg27508002 | 0.0089 | 0.0020 | Glycemic load (overweight/obese)  | 0.0021   | 0.0014 | 0.1391 | Glycemic load (normal weight)     | 0.0019 | 0.0011 | 0.1013   | Glycemic load (whole group)  | TRUE  | TRUE  | TRUE  |
| cg27525032 | -0.036 | 0.0079 | Glycemic load (overweight/obese)  | 0.0032   | 0.0036 | 0.3764 | Glycemic load (normal weight)     | -0.004 | 0.0033 | 0.2093   | Glycemic load (whole group)  | FALSE | TRUE  | FALSE |

**Table S11. Overlapping CpGs between meta-analyses results (FDR <0.05) and the EWAS catalogue**

| Meta-analysis results |                                   |                | Results from the public EWAS catalogue |             |            |           |
|-----------------------|-----------------------------------|----------------|----------------------------------------|-------------|------------|-----------|
| CpG                   | Meta-analysis model               | Exposure       | Outcome                                | Tissue      | Age        | PubMed ID |
| cg17747781            | Glycemic index (overweight/obese) | 1-hour glucose | DNA methylation                        | Cord blood  | Infants    | 33151971  |
| cg17747781            | Glycemic index (overweight/obese) | 1-hour glucose | DNA methylation                        | Cord blood  | Infants    | 33151971  |
| cg27260684            | Glycemic load (overweight/obese)  | age            | DNA methylation                        | Whole blood | Children   | 33450751  |
| cg09435668            | Glycemic load (overweight/obese)  | age            | DNA methylation                        | Whole blood | Children   | 33450751  |
| cg16711866            | Glycemic load (overweight/obese)  | age            | DNA methylation                        | Whole blood | Children   | 33450751  |
| cg18949521            | Glycemic load (overweight/obese)  | age            | DNA methylation                        | Whole blood | Children   | 33450751  |
| cg21000227            | Glycemic load (overweight/obese)  | age            | DNA methylation                        | Whole blood | Children   | 33450751  |
| cg00718883            | Glycemic load (overweight/obese)  | age            | DNA methylation                        | Whole blood | Children   | 33450751  |
| cg11751808            | Glycemic load (overweight/obese)  | age            | DNA methylation                        | Whole blood | Children   | 33450751  |
| cg16622906            | Glycemic load (overweight/obese)  | age            | DNA methylation                        | Whole blood | Children   | 33450751  |
| cg19411557            | Glycemic load (overweight/obese)  | age            | DNA methylation                        | Whole blood | Children   | 33450751  |
| cg14558716            | Glycemic index (overweight/obese) | age            | DNA methylation                        | Whole blood | Children   | 33450751  |
| cg19706472            | Glycemic index (overweight/obese) | age            | DNA methylation                        | Whole blood | Children   | 33450751  |
| cg05040501            | Glycemic load (overweight/obese)  | age            | DNA methylation                        | Whole blood | Children   | 33450751  |
| cg16491865            | Glycemic load (overweight/obese)  | age            | DNA methylation                        | Whole blood | Children   | 33450751  |
| cg05761971            | Glycemic load (overweight/obese)  | age            | DNA methylation                        | Whole blood | Children   | 33450751  |
| cg18610053            | Glycemic load (overweight/obese)  | age            | DNA methylation                        | Whole blood | Children   | 33450751  |
| cg03086067            | Glycemic load (overweight/obese)  | age            | DNA methylation                        | Whole blood | Children   | 33450751  |
| cg20785459            | Glycemic load (overweight/obese)  | age            | DNA methylation                        | Whole blood | Children   | 33450751  |
| cg00961418            | Glycemic index (overweight/obese) | age            | DNA methylation                        | Whole blood | Children   | 33450751  |
| cg00961418            | Glycemic index (overweight/obese) | Age            | DNA methylation                        | Whole blood | Adults     | 23177740  |
| cg06655190            | Glycemic load (overweight/obese)  | age            | DNA methylation                        | Whole blood | Children   | 33450751  |
| cg20641660            | Glycemic load (overweight/obese)  | age            | DNA methylation                        | Whole blood | Children   | 33450751  |
| cg25349643            | Glycemic load (overweight/obese)  | age            | DNA methylation                        | Whole blood | Children   | 33450751  |
| cg08064292            | Glycemic load (overweight/obese)  | age            | DNA methylation                        | Whole blood | Children   | 33450751  |
| cg01708711            | Glycemic load (overweight/obese)  | age            | DNA methylation                        | Whole blood | Children   | 33450751  |
| cg00415993            | Glycemic load (overweight/obese)  | age            | DNA methylation                        | Whole blood | Children   | 33450751  |
| cg13848802            | Glycemic load (overweight/obese)  | age            | DNA methylation                        | Whole blood | Children   | 33450751  |
| cg14403090            | Glycemic load (overweight/obese)  | age            | DNA methylation                        | Whole blood | Children   | 33450751  |
| cg20936120            | Glycemic load (overweight/obese)  | age            | DNA methylation                        | Whole blood | Children   | 33450751  |
| cg26272214            | Glycemic load (overweight/obese)  | age            | DNA methylation                        | Whole blood | Children   | 33450751  |
| cg01407748            | Glycemic index (overweight/obese) | age            | DNA methylation                        | Whole blood | Children   | 33450751  |
| cg05232496            | Glycemic load (overweight/obese)  | age            | DNA methylation                        | Whole blood | Children   | 33450751  |
| cg24065451            | Glycemic load (overweight/obese)  | Age            | DNA methylation                        | Whole blood | Adults     | 23177740  |
| cg24065451            | Glycemic load (overweight/obese)  | age            | DNA methylation                        | Whole blood | Children   | 33450751  |
| cg05094137            | Glycemic index (normal weight)    | age            | DNA methylation                        | Whole blood | Children   | 33450751  |
| cg19388739            | Glycemic load (overweight/obese)  | age            | DNA methylation                        | Whole blood | Children   | 33450751  |
| cg12787530            | Glycemic load (overweight/obese)  | age            | DNA methylation                        | Whole blood | Children   | 33450751  |
| cg10389914            | Glycemic load (overweight/obese)  | age            | DNA methylation                        | Whole blood | Children   | 33450751  |
| cg09870200            | Glycemic load (overweight/obese)  | age            | DNA methylation                        | Whole blood | Children   | 33450751  |
| cg13679817            | Glycemic index (overweight/obese) | age            | DNA methylation                        | Whole blood | Children   | 33450751  |
| cg07040338            | Glycemic index (overweight/obese) | age            | DNA methylation                        | Whole blood | Children   | 33450751  |
| cg15497249            | Glycemic load (overweight/obese)  | age            | DNA methylation                        | Whole blood | Children   | 33450751  |
| cg24892433            | Glycemic load (overweight/obese)  | age            | DNA methylation                        | Whole blood | Children   | 33450751  |
| cg11797226            | Glycemic load (overweight/obese)  | age            | DNA methylation                        | Whole blood | Children   | 33450751  |
| cg18840037            | Glycemic index (overweight/obese) | age            | DNA methylation                        | Whole blood | Children   | 33450751  |
| cg09697644            | Glycemic load (overweight/obese)  | age            | DNA methylation                        | Whole blood | Children   | 33450751  |
| cg08415582            | Glycemic load (overweight/obese)  | age            | DNA methylation                        | Whole blood | Children   | 33450751  |
| cg25603927            | Glycemic index (overweight/obese) | age            | DNA methylation                        | Whole blood | Children   | 33450751  |
| cg09277575            | Glycemic load (overweight/obese)  | age            | DNA methylation                        | Whole blood | Children   | 33450751  |
| cg08704196            | Glycemic load (overweight/obese)  | age            | DNA methylation                        | Whole blood | Children   | 33450751  |
| cg12807668            | Glycemic load (overweight/obese)  | age            | DNA methylation                        | Whole blood | Children   | 33450751  |
| cg13257654            | Glycemic load (overweight/obese)  | age            | DNA methylation                        | Whole blood | Children   | 33450751  |
| cg02783833            | Glycemic load (overweight/obese)  | age            | DNA methylation                        | Whole blood | Children   | 33450751  |
| cg00571747            | Glycemic load (overweight/obese)  | age            | DNA methylation                        | Whole blood | Children   | 33450751  |
| cg24057041            | Glycemic load (overweight/obese)  | age            | DNA methylation                        | Whole blood | Children   | 33450751  |
| cg27284034            | Glycemic load (overweight/obese)  | age            | DNA methylation                        | Whole blood | Children   | 33450751  |
| cg18895813            | Glycemic load (overweight/obese)  | age            | DNA methylation                        | Whole blood | Children   | 33450751  |
| cg13551783            | Glycemic load (overweight/obese)  | age            | DNA methylation                        | Whole blood | Children   | 33450751  |
| cg00683332            | Glycemic load (overweight/obese)  | Age            | DNA methylation                        | Whole blood | Geriatrics | 28811542  |
| cg00683332            | Glycemic load (overweight/obese)  | age            | DNA methylation                        | Whole blood | Children   | 33450751  |
| cg03058038            | Glycemic load (overweight/obese)  | age            | DNA methylation                        | Whole blood | Children   | 33450751  |
| cg05523449            | Glycemic load (overweight/obese)  | age            | DNA methylation                        | Whole blood | Children   | 33450751  |
| cg06652210            | Glycemic load (overweight/obese)  | age            | DNA methylation                        | Whole blood | Children   | 33450751  |
| cg07341220            | Glycemic index (overweight/obese) | age            | DNA methylation                        | Whole blood | Children   | 33450751  |
| cg12757684            | Glycemic load (overweight/obese)  | age            | DNA methylation                        | Whole blood | Children   | 33450751  |
| cg21500799            | Glycemic load (overweight/obese)  | age            | DNA methylation                        | Whole blood | Children   | 33450751  |
| cg00913954            | Glycemic index (overweight/obese) | age            | DNA methylation                        | Whole blood | Children   | 33450751  |
| cg14736911            | Glycemic load (overweight/obese)  | age            | DNA methylation                        | Whole blood | Children   | 33450751  |
| cg01326048            | Glycemic load (overweight/obese)  | age            | DNA methylation                        | Whole blood | Children   | 33450751  |
| cg05442602            | Glycemic load (overweight/obese)  | age            | DNA methylation                        | Whole blood | Children   | 33450751  |
| cg22068687            | Glycemic load (overweight/obese)  | age            | DNA methylation                        | Whole blood | Children   | 33450751  |
| cg13465890            | Glycemic index (overweight/obese) | age            | DNA methylation                        | Whole blood | Children   | 33450751  |
| cg19655128            | Glycemic index (overweight/obese) | age            | DNA methylation                        | Whole blood | Children   | 33450751  |
| cg23264059            | Glycemic index (overweight/obese) | age            | DNA methylation                        | Whole blood | Children   | 33450751  |
| cg15713801            | Glycemic load (overweight/obese)  | age            | DNA methylation                        | Whole blood | Children   | 33450751  |
| cg01245155            | Glycemic index (overweight/obese) | Age            | DNA methylation                        | Breast      | Adults     | 28693600  |
| cg01245155            | Glycemic index (overweight/obese) | Age            | DNA methylation                        | Whole blood | Adults     | 23177740  |
| cg01245155            | Glycemic index (overweight/obese) | age            | DNA methylation                        | Whole blood | Children   | 33450751  |
| cg02369380            | Glycemic index (overweight/obese) | age            | DNA methylation                        | Whole blood | Children   | 33450751  |
| cg08657492            | Glycemic index (overweight/obese) | age            | DNA methylation                        | Whole blood | Children   | 33450751  |
| cg09854726            | Glycemic index (overweight/obese) | age            | DNA methylation                        | Whole blood | Children   | 33450751  |
| cg16086237            | Glycemic load (overweight/obese)  | age            | DNA methylation                        | Whole blood | Children   | 33450751  |

|            |                                   |     |                 |                          |            |          |
|------------|-----------------------------------|-----|-----------------|--------------------------|------------|----------|
| cg10196042 | Glycemic load (overweight/obese)  | age | DNA methylation | Whole blood              | Children   | 33450751 |
| cg21463140 | Glycemic index (overweight/obese) | age | DNA methylation | Whole blood              | Children   | 33450751 |
| cg19985870 | Glycemic load (overweight/obese)  | age | DNA methylation | Whole blood              | Children   | 33450751 |
| cg23513183 | Glycemic load (overweight/obese)  | age | DNA methylation | Whole blood              | Children   | 33450751 |
| cg06715661 | Glycemic load (overweight/obese)  | age | DNA methylation | Whole blood              | Children   | 33450751 |
| cg16204509 | Glycemic load (overweight/obese)  | age | DNA methylation | Whole blood              | Children   | 33450751 |
| cg14350448 | Glycemic load (overweight/obese)  | age | DNA methylation | Whole blood              | Children   | 33450751 |
| cg24309215 | Glycemic load (overweight/obese)  | age | DNA methylation | Whole blood              | Children   | 33450751 |
| cg07739369 | Glycemic load (overweight/obese)  | Age | DNA methylation | Whole blood              | Adults     | 23177740 |
| cg07739369 | Glycemic load (overweight/obese)  | age | DNA methylation | Whole blood              | Children   | 33450751 |
| cg24104567 | Glycemic load (overweight/obese)  | age | DNA methylation | Whole blood              | Children   | 33450751 |
| cg2432002  | Glycemic load (overweight/obese)  | age | DNA methylation | Whole blood              | Children   | 33450751 |
| cg07136761 | Glycemic index (overweight/obese) | age | DNA methylation | Whole blood              | Children   | 33450751 |
| cg11893951 | Glycemic index (overweight/obese) | age | DNA methylation | Whole blood              | Children   | 33450751 |
| cg24773560 | Glycemic load (overweight/obese)  | age | DNA methylation | Whole blood              | Children   | 33450751 |
| cg08271400 | Glycemic index (overweight/obese) | age | DNA methylation | Whole blood              | Children   | 33450751 |
| cg03707256 | Glycemic load (overweight/obese)  | age | DNA methylation | Whole blood              | Children   | 33450751 |
| cg16573044 | Glycemic load (overweight/obese)  | age | DNA methylation | Whole blood              | Children   | 33450751 |
| cg17811589 | Glycemic load (overweight/obese)  | age | DNA methylation | Whole blood              | Children   | 33450751 |
| cg16563171 | Glycemic index (overweight/obese) | age | DNA methylation | Whole blood              | Children   | 33450751 |
| cg16563171 | Glycemic index (overweight/obese) | Age | DNA methylation | Whole blood              | Geriatrics | 28811542 |
| cg17457637 | Glycemic index (overweight/obese) | age | DNA methylation | Whole blood              | Children   | 33450751 |
| cg24147838 | Glycemic index (normal weight)    | age | DNA methylation | Whole blood              | Children   | 33450751 |
| cg09243533 | Glycemic load (normal weight)     | age | DNA methylation | Whole blood              | Children   | 33450751 |
| cg02795334 | Glycemic index (normal weight)    | age | DNA methylation | Whole blood              | Children   | 33450751 |
| cg13689560 | Glycemic load (overweight/obese)  | age | DNA methylation | Whole blood              | Children   | 33450751 |
| cg24128943 | Glycemic load (overweight/obese)  | age | DNA methylation | Whole blood              | Children   | 33450751 |
| cg01766844 | Glycemic load (overweight/obese)  | age | DNA methylation | Whole blood              | Children   | 33450751 |
| cg22647970 | Glycemic load (overweight/obese)  | age | DNA methylation | Whole blood              | Children   | 33450751 |
| cg04343494 | Glycemic index (overweight/obese) | age | DNA methylation | Whole blood              | Children   | 33450751 |
| cg09369190 | Glycemic index (overweight/obese) | age | DNA methylation | Whole blood              | Children   | 33450751 |
| cg10257671 | Glycemic index (overweight/obese) | age | DNA methylation | Whole blood              | Children   | 33450751 |
| cg12832565 | Glycemic index (overweight/obese) | age | DNA methylation | Fetal liver, adult liver | Adults     | 25282492 |
| cg12832565 | Glycemic index (overweight/obese) | age | DNA methylation | Whole blood              | Children   | 33450751 |
| cg14197205 | Glycemic index (overweight/obese) | age | DNA methylation | Whole blood              | Children   | 33450751 |
| cg15645685 | Glycemic index (overweight/obese) | age | DNA methylation | Whole blood              | Children   | 33450751 |
| cg25074751 | Glycemic index (overweight/obese) | age | DNA methylation | Whole blood              | Children   | 33450751 |
| cg25934824 | Glycemic index (overweight/obese) | age | DNA methylation | Whole blood              | Children   | 33450751 |
| cg26107055 | Glycemic index (overweight/obese) | age | DNA methylation | Whole blood              | Children   | 33450751 |
| cg27367326 | Glycemic index (overweight/obese) | age | DNA methylation | Whole blood              | Adults     | 23177740 |
| cg27367526 | Glycemic index (overweight/obese) | age | DNA methylation | Whole blood              | Children   | 33450751 |
| cg27367526 | Glycemic index (overweight/obese) | Age | DNA methylation | Whole blood              | Geriatrics | 28811542 |
| cg02994399 | Glycemic load (overweight/obese)  | age | DNA methylation | Whole blood              | Children   | 33450751 |
| cg23979520 | Glycemic load (overweight/obese)  | age | DNA methylation | Whole blood              | Children   | 33450751 |
| cg06602723 | Glycemic load (overweight/obese)  | age | DNA methylation | Whole blood              | Children   | 33450751 |
| cg15676371 | Glycemic load (overweight/obese)  | age | DNA methylation | Whole blood              | Children   | 33450751 |
| cg06292709 | Glycemic load (overweight/obese)  | age | DNA methylation | Whole blood              | Children   | 33450751 |
| cg10672416 | Glycemic load (overweight/obese)  | age | DNA methylation | Whole blood              | Children   | 33450751 |
| cg02054431 | Glycemic index (overweight/obese) | age | DNA methylation | Whole blood              | Children   | 33450751 |
| cg22879270 | Glycemic index (normal weight)    | age | DNA methylation | Whole blood              | Children   | 33450751 |
| cg18503679 | Glycemic load (overweight/obese)  | age | DNA methylation | Whole blood              | Children   | 33450751 |
| cg09427273 | Glycemic load (overweight/obese)  | age | DNA methylation | Whole blood              | Children   | 33450751 |
| cg07455279 | Glycemic load (overweight/obese)  | age | DNA methylation | Whole blood              | Children   | 33450751 |
| cg11105358 | Glycemic load (overweight/obese)  | age | DNA methylation | Whole blood              | Children   | 33450751 |
| cg11116798 | Glycemic load (overweight/obese)  | age | DNA methylation | Whole blood              | Children   | 33450751 |
| cg16555188 | Glycemic load (overweight/obese)  | age | DNA methylation | Whole blood              | Children   | 33450751 |
| cg27525032 | Glycemic index (overweight/obese) | age | DNA methylation | Whole blood              | Children   | 33450751 |
| cg23889772 | Glycemic index (overweight/obese) | age | DNA methylation | Whole blood              | Children   | 33450751 |
| cg06905046 | Glycemic index (overweight/obese) | age | DNA methylation | Whole blood              | Children   | 33450751 |
| cg23120601 | Glycemic index (overweight/obese) | age | DNA methylation | Whole blood              | Children   | 33450751 |
| cg27421105 | Glycemic index (overweight/obese) | age | DNA methylation | Whole blood              | Children   | 33450751 |
| cg2649688  | Glycemic load (overweight/obese)  | age | DNA methylation | Whole blood              | Children   | 33450751 |
| cg16908944 | Glycemic load (overweight/obese)  | age | DNA methylation | Whole blood              | Children   | 33450751 |
| cg27425709 | Glycemic load (overweight/obese)  | age | DNA methylation | Whole blood              | Children   | 33450751 |
| cg05423392 | Glycemic load (overweight/obese)  | age | DNA methylation | Whole blood              | Children   | 33450751 |
| cg23562160 | Glycemic load (overweight/obese)  | age | DNA methylation | Whole blood              | Children   | 33450751 |
| cg25800356 | Glycemic load (normal weight)     | age | DNA methylation | Whole blood              | Children   | 33450751 |
| cg08529295 | Glycemic index (overweight/obese) | age | DNA methylation | Whole blood              | Children   | 33450751 |
| cg27084781 | Glycemic load (overweight/obese)  | age | DNA methylation | Whole blood              | Children   | 33450751 |
| cg21792018 | Glycemic load (overweight/obese)  | age | DNA methylation | Whole blood              | Children   | 33450751 |
| cg24832222 | Glycemic load (overweight/obese)  | age | DNA methylation | Whole blood              | Children   | 33450751 |
| cg02909929 | Glycemic load (overweight/obese)  | Age | DNA methylation | Whole blood              | Children   | 33450751 |
| cg02909929 | Glycemic load (overweight/obese)  | Age | DNA methylation | Whole blood              | Adults     | 23177740 |
| cg27254338 | Glycemic load (overweight/obese)  | age | DNA methylation | Whole blood              | Children   | 33450751 |
| cg07562888 | Glycemic load (overweight/obese)  | age | DNA methylation | Whole blood              | Children   | 33450751 |
| cg05413285 | Glycemic index (overweight/obese) | age | DNA methylation | Whole blood              | Children   | 33450751 |
| cg12463578 | Glycemic load (overweight/obese)  | age | DNA methylation | Whole blood              | Children   | 33450751 |
| cg25496004 | Glycemic index (overweight/obese) | age | DNA methylation | Whole blood              | Children   | 33450751 |
| cg03036707 | Glycemic load (overweight/obese)  | age | DNA methylation | Whole blood              | Children   | 33450751 |
| cg05269359 | Glycemic load (overweight/obese)  | age | DNA methylation | Whole blood              | Children   | 33450751 |
| cg0368959  | Glycemic load (overweight/obese)  | age | DNA methylation | Whole blood              | Children   | 33450751 |
| cg07016556 | Glycemic load (overweight/obese)  | age | DNA methylation | Whole blood              | Children   | 33450751 |
| cg19070159 | Glycemic load (overweight/obese)  | age | DNA methylation | Whole blood              | Children   | 33450751 |
| cg19830372 | Glycemic load (overweight/obese)  | age | DNA methylation | Whole blood              | Children   | 33450751 |
| cg06540283 | Glycemic load (overweight/obese)  | age | DNA methylation | Whole blood              | Children   | 33450751 |
| cg10400725 | Glycemic index (overweight/obese) | age | DNA methylation | Whole blood              | Children   | 33450751 |
| cg08121652 | Glycemic load (overweight/obese)  | age | DNA methylation | Whole blood              | Children   | 33450751 |



|             |                                   |                                |                 |                         |            |          |
|-------------|-----------------------------------|--------------------------------|-----------------|-------------------------|------------|----------|
| cg08915171  | Glycemic load (overweight/obese)  | Age                            | DNA methylation | Whole blood             | Adults     | 23177740 |
| cg00910355  | Glycemic load (overweight/obese)  | age                            | DNA methylation | Whole blood             | Children   | 33450751 |
| cg21813747  | Glycemic load (overweight/obese)  | age                            | DNA methylation | Whole blood             | Children   | 33450751 |
| cg21813747  | Glycemic load (overweight/obese)  | Age                            | DNA methylation | Whole blood             | Adults     | 23177740 |
| cg02291010  | Glycemic load (overweight/obese)  | age                            | DNA methylation | Whole blood             | Children   | 33450751 |
| cg14297063  | Glycemic load (overweight/obese)  | age                            | DNA methylation | Whole blood             | Children   | 33450751 |
| cg24504349  | Glycemic load (overweight/obese)  | age                            | DNA methylation | Whole blood             | Children   | 33450751 |
| cg22110973  | Glycemic index (overweight/obese) | age                            | DNA methylation | Whole blood             | Children   | 33450751 |
| cg01140247  | Glycemic index (overweight/obese) | age                            | DNA methylation | Whole blood             | Children   | 33450751 |
| cg01566217  | Glycemic index (overweight/obese) | age                            | DNA methylation | Whole blood             | Children   | 33450751 |
| cg12117164  | Glycemic index (overweight/obese) | age                            | DNA methylation | Whole blood             | Children   | 33450751 |
| cg06510234  | Glycemic index (overweight/obese) | age                            | DNA methylation | Whole blood             | Children   | 33450751 |
| cg24652379  | Glycemic index (overweight/obese) | age                            | DNA methylation | Whole blood             | Children   | 33450751 |
| cg20885078  | Glycemic index (overweight/obese) | age                            | DNA methylation | Whole blood             | Children   | 33450751 |
| cg18441811  | Glycemic load (overweight/obese)  | age                            | DNA methylation | Whole blood             | Children   | 33450751 |
| cg19710916  | Glycemic load (overweight/obese)  | age                            | DNA methylation | Whole blood             | Children   | 33450751 |
| cg051399244 | Glycemic index (overweight/obese) | age*                           | DNA methylation | Whole blood             | Children   | 33450751 |
| cg13060970  | Glycemic load (overweight/obese)  | Age                            | DNA methylation | Whole blood             | Adults     | 23177740 |
| cg13060970  | Glycemic load (overweight/obese)  | age                            | DNA methylation | Whole blood             | Children   | 33450751 |
| cg14341131  | Glycemic load (overweight/obese)  | age                            | DNA methylation | Whole blood             | Children   | 33450751 |
| cg17828057  | Glycemic index (overweight/obese) | age                            | DNA methylation | Whole blood             | Children   | 33450751 |
| cg00588621  | Glycemic load (overweight/obese)  | age                            | DNA methylation | Whole blood             | Children   | 33450751 |
| cg01723892  | Glycemic load (overweight/obese)  | age                            | DNA methylation | Whole blood             | Children   | 33450751 |
| cg07723258  | Glycemic load (overweight/obese)  | age                            | DNA methylation | Whole blood             | Children   | 33450751 |
| cg04889688  | Glycemic load (overweight/obese)  | age                            | DNA methylation | Whole blood             | Children   | 33450751 |
| cg07151406  | Glycemic index (overweight/obese) | age                            | DNA methylation | Whole blood             | Children   | 33450751 |
| cg09728927  | Glycemic load (overweight/obese)  | age                            | DNA methylation | Whole blood             | Children   | 33450751 |
| cg08064292  | Glycemic load (overweight/obese)  | Age 4 vs age 0                 | DNA methylation | Whole blood, cord blood | NA         | 28056824 |
| cg00415993  | Glycemic load (overweight/obese)  | Age 4 vs age 0                 | DNA methylation | Whole blood, cord blood | NA         | 28056824 |
| cg24065451  | Glycemic load (overweight/obese)  | Age 4 vs age 0                 | DNA methylation | Whole blood, cord blood | NA         | 28056824 |
| cg07341220  | Glycemic index (overweight/obese) | Age 4 vs age 0                 | DNA methylation | Whole blood, cord blood | NA         | 28056824 |
| cg16086237  | Glycemic load (overweight/obese)  | Age 4 vs age 0                 | DNA methylation | Whole blood, cord blood | NA         | 28056824 |
| cg14360448  | Glycemic load (overweight/obese)  | Age 4 vs age 0                 | DNA methylation | Whole blood, cord blood | NA         | 28056824 |
| cg24332002  | Glycemic load (overweight/obese)  | Age 4 vs age 0                 | DNA methylation | Whole blood, cord blood | NA         | 28056824 |
| cg27367526  | Glycemic index (overweight/obese) | Age 4 vs age 0                 | DNA methylation | Whole blood, cord blood | NA         | 28056824 |
| cg2389772   | Glycemic index (overweight/obese) | Age 4 vs age 0                 | DNA methylation | Whole blood, cord blood | NA         | 28056824 |
| cg23562160  | Glycemic load (overweight/obese)  | Age 4 vs age 0                 | DNA methylation | Whole blood, cord blood | NA         | 28056824 |
| cg07016556  | Glycemic load (overweight/obese)  | Age 4 vs age 0                 | DNA methylation | Whole blood, cord blood | NA         | 28056824 |
| cg19070159  | Glycemic load (overweight/obese)  | Age 4 vs age 0                 | DNA methylation | Whole blood, cord blood | NA         | 28056824 |
| cg25970491  | Glycemic load (overweight/obese)  | Age 4 vs age 0                 | DNA methylation | Whole blood, cord blood | NA         | 28056824 |
| cg14873515  | Glycemic load (overweight/obese)  | Age 4 vs age 0                 | DNA methylation | Whole blood, cord blood | NA         | 28056824 |
| cg08262002  | Glycemic index (overweight/obese) | Age 4 vs age 0                 | DNA methylation | Whole blood, cord blood | NA         | 28056824 |
| cg10807894  | Glycemic index (overweight/obese) | Age 4 vs age 0                 | DNA methylation | Whole blood, cord blood | NA         | 28056824 |
| cg18441811  | Glycemic load (overweight/obese)  | Age 4 vs age 0                 | DNA methylation | Whole blood, cord blood | NA         | 28056824 |
| cg04889688  | Glycemic load (overweight/obese)  | Age 4 vs age 0                 | DNA methylation | Whole blood, cord blood | NA         | 28056824 |
| cg13679817  | Glycemic index (overweight/obese) | Age group                      | DNA methylation | Whole blood             | Adults     | 25888029 |
| cg07739369  | Glycemic load (overweight/obese)  | Age group                      | DNA methylation | Whole blood             | Adults     | 25888029 |
| cg24104567  | Glycemic load (overweight/obese)  | Age group                      | DNA methylation | Whole blood             | Adults     | 25888029 |
| cg00377865  | Glycemic load (overweight/obese)  | Age group                      | DNA methylation | Whole blood             | Adults     | 25888029 |
| cg15735129  | Glycemic index (overweight/obese) | Age group                      | DNA methylation | Whole blood             | Adults     | 25888029 |
| cg08262002  | Glycemic index (overweight/obese) | Age group                      | DNA methylation | Whole blood             | Adults     | 25888029 |
| cg10807894  | Glycemic index (overweight/obese) | Age group                      | DNA methylation | Whole blood             | Adults     | 25888029 |
| cg15489979  | Glycemic index (overweight/obese) | Age group                      | DNA methylation | Whole blood             | Adults     | 25888029 |
| cg24065451  | Glycemic load (overweight/obese)  | age*sex                        | DNA methylation | Whole blood             | Children   | 33450751 |
| cg13257654  | Glycemic load (overweight/obese)  | age*sex                        | DNA methylation | Whole blood             | Children   | 33450751 |
| cg13551783  | Glycemic load (overweight/obese)  | age*sex                        | DNA methylation | Whole blood             | Children   | 33450751 |
| cg18503679  | Glycemic load (overweight/obese)  | age*sex                        | DNA methylation | Whole blood             | Children   | 33450751 |
| cg23562160  | Glycemic load (overweight/obese)  | age*sex                        | DNA methylation | Whole blood             | Children   | 33450751 |
| cg02909929  | Glycemic load (overweight/obese)  | age*sex                        | DNA methylation | Whole blood             | Children   | 33450751 |
| cg02139962  | Glycemic load (overweight/obese)  | age*sex                        | DNA methylation | Whole blood             | Children   | 33450751 |
| cg21420674  | Glycemic index (overweight/obese) | age*sex                        | DNA methylation | Whole blood             | Children   | 33450751 |
| cg08262002  | Glycemic index (overweight/obese) | age*sex                        | DNA methylation | Whole blood             | Children   | 33450751 |
| cg08915171  | Glycemic load (overweight/obese)  | age*sex                        | DNA methylation | Whole blood             | Children   | 33450751 |
| cg14297063  | Glycemic load (overweight/obese)  | age*sex                        | DNA methylation | Whole blood             | Children   | 33450751 |
| cg11613450  | Glycemic load (overweight/obese)  | age*sex                        | DNA methylation | Whole blood             | Children   | 33450751 |
| cg17828057  | Glycemic index (overweight/obese) | age*sex                        | DNA methylation | Whole blood             | Children   | 33450751 |
| cg02435333  | Glycemic load (normal weight)     | Aggressive behaviour           | DNA methylation | Whole blood             | Adults     | 33420481 |
| cg08262002  | Glycemic index (overweight/obese) | Aging                          | DNA methylation | Whole blood             | Geriatrics | 30264654 |
| cg24773560  | Glycemic load (overweight/obese)  | Alcohol Consumption            | DNA methylation | Whole blood             | Adults     | 30938765 |
| cg24065451  | Glycemic load (overweight/obese)  | Alcohol consumption per day    | DNA methylation | Whole blood             | Adults     | 27843151 |
| cg24773560  | Glycemic load (overweight/obese)  | Alcohol consumption per day    | DNA methylation | Whole blood             | Adults     | 27843151 |
| cg02054431  | Glycemic index (overweight/obese) | Alcohol consumption per day    | DNA methylation | Whole blood             | Adults     | 27843151 |
| cg18503679  | Glycemic load (overweight/obese)  | Alcohol consumption per day    | DNA methylation | Whole blood             | Adults     | 27843151 |
| cg14511782  | Glycemic load (overweight/obese)  | Alcohol consumption per day    | DNA methylation | Whole blood             | Adults     | 27843151 |
| cg23632178  | Glycemic load (overweight/obese)  | alcohol withdrawal recovery    | DNA methylation | whole blood             | Adults     | 32080920 |
| cg14873515  | Glycemic load (overweight/obese)  | alcohol withdrawal recovery    | DNA methylation | whole blood             | Adults     | 32080920 |
| cg07723258  | Glycemic load (overweight/obese)  | alcohol withdrawal recovery    | DNA methylation | whole blood             | Adults     | 32080920 |
| cg25603927  | Glycemic index (overweight/obese) | Alzheimer's disease            | DNA methylation | Brain                   | Geriatrics | 30045751 |
| cg19605773  | Glycemic load (overweight/obese)  | Alzheimer's disease            | DNA methylation | Brain                   | Geriatrics | 30045751 |
| cg14297063  | Glycemic load (overweight/obese)  | Alzheimer's disease            | DNA methylation | Brain cortex            | Geriatrics | 30550539 |
| cg07151406  | Glycemic index (overweight/obese) | Alzheimer's disease            | DNA methylation | Brain                   | Geriatrics | 30045751 |
| cg13257654  | Glycemic load (overweight/obese)  | alzheimers disease braak stage | DNA methylation | Prefrontal cortex       | Adults     | 33257653 |
| cg01126048  | Glycemic load (overweight/obese)  | alzheimers disease braak stage | DNA methylation | Prefrontal cortex       | Adults     | 33257653 |
| cg08657492  | Glycemic index (overweight/obese) | alzheimers disease braak stage | DNA methylation | Prefrontal cortex       | Adults     | 33257653 |
| cg07739369  | Glycemic load (overweight/obese)  | alzheimers disease braak stage | DNA methylation | Prefrontal cortex       | Adults     | 33257653 |
| cg17457637  | Glycemic index (overweight/obese) | alzheimers disease braak stage | DNA methylation | Prefrontal cortex       | Adults     | 33257653 |
| cg02054431  | Glycemic index (overweight/obese) | alzheimers disease braak stage | DNA methylation | Prefrontal cortex       | Adults     | 33257653 |

|            |                                   |                                                         |                                             |                                                                 |            |           |
|------------|-----------------------------------|---------------------------------------------------------|---------------------------------------------|-----------------------------------------------------------------|------------|-----------|
| cg23120601 | Glycemic index (overweight/obese) | alzheimers disease braak stage                          | DNA methylation                             | Prefrontal cortex                                               | Adults     | 3325/7653 |
| cg07345108 | Glycemic load (overweight/obese)  | alzheimers disease braak stage                          | DNA methylation                             | Prefrontal cortex                                               | Adults     | 3325/7653 |
| cg25938010 | Glycemic load (overweight/obese)  | Arsenic exposure                                        | DNA methylation                             | Whole blood                                                     | Adults     | 29982128  |
| cg19411557 | Glycemic load (overweight/obese)  | atopy                                                   | DNA methylation                             | nasal polyp                                                     | Adults     | 32795589  |
| cg23932178 | Glycemic load (overweight/obese)  | atopy                                                   | DNA methylation                             | nasal polyp                                                     | Adults     | 32795589  |
| cg21165673 | Glycemic load (overweight/obese)  | atopy                                                   | DNA methylation                             | nasal polyp                                                     | Adults     | 32795589  |
| cg13422870 | Glycemic index (overweight/obese) | atopy                                                   | DNA methylation                             | nasal polyp                                                     | Adults     | 32795589  |
| cg19388739 | Glycemic load (overweight/obese)  | atopy                                                   | DNA methylation                             | nasal polyp                                                     | Adults     | 32795589  |
| cg03688771 | Glycemic index (normal weight)    | atopy                                                   | DNA methylation                             | nasal polyp                                                     | Adults     | 32795589  |
| cg24404567 | Glycemic load (overweight/obese)  | atopy                                                   | DNA methylation                             | nasal polyp                                                     | Adults     | 32795589  |
| cg04343494 | Glycemic index (overweight/obese) | atopy                                                   | DNA methylation                             | nasal polyp                                                     | Adults     | 32795589  |
| cg25074751 | Glycemic index (overweight/obese) | atopy                                                   | DNA methylation                             | nasal polyp                                                     | Adults     | 32795589  |
| cg01530292 | Glycemic index (normal weight)    | atopy                                                   | DNA methylation                             | nasal polyp                                                     | Adults     | 32795589  |
| cg05269359 | Glycemic load (overweight/obese)  | atopy                                                   | DNA methylation                             | nasal polyp                                                     | Adults     | 32795589  |
| cg05026198 | Glycemic load (overweight/obese)  | atopy                                                   | DNA methylation                             | nasal polyp                                                     | Adults     | 32795589  |
| cg10636896 | Glycemic index (overweight/obese) | atopy                                                   | DNA methylation                             | nasal polyp                                                     | Adults     | 32795589  |
| cg23029104 | Glycemic index (normal weight)    | atopy                                                   | DNA methylation                             | nasal polyp                                                     | Adults     | 32795589  |
| cg03077077 | Glycemic index (overweight/obese) | atopy                                                   | DNA methylation                             | nasal polyp                                                     | Adults     | 32795589  |
| cg12832565 | Glycemic index (overweight/obese) | Autoantibody production in systemic lupus erythematosus | DNA methylation                             | Whole blood                                                     | Adults     | 26192630  |
| cg07908697 | Glycemic load (overweight/obese)  | birthweight                                             | DNA methylation                             | Whole blood                                                     | Adults     | 33079621  |
| cg16097041 | Glycemic load (overweight/obese)  | body mass index                                         | DNA methylation                             | Whole blood                                                     | Adults     | 25935004  |
| cg23120601 | Glycemic index (overweight/obese) | braak stage                                             | DNA methylation                             | Prefrontal cortex                                               | Geriatrics | 33902726  |
| cg13848802 | Glycemic load (overweight/obese)  | breast cancer                                           | DNA methylation                             | Whole blood                                                     | Adults     | 30980176  |
| cg19802547 | Glycemic index (normal weight)    | Breastfeeding                                           | DNA methylation                             | Buccal cells                                                    | Children   | 31744183  |
| cg26272214 | Glycemic load (overweight/obese)  | Breastfeeding duration                                  | DNA methylation                             | Buccal cells                                                    | Children   | 31744183  |
| cg03116409 | Glycemic index (overweight/obese) | Cancer treatment: anti-metabolites                      | DNA methylation                             | Whole blood                                                     | Children   | 33823916  |
| cg19165274 | Glycemic load (overweight/obese)  | Child abuse                                             | DNA methylation                             | Saliva                                                          | Children   | 23332324  |
| cg07732328 | Glycemic load (overweight/obese)  | Chronic kidney disease                                  | DNA methylation                             | Whole Blood                                                     | Adults     | 29097680  |
| cg00718883 | Glycemic load (overweight/obese)  | Clear cell renal carcinoma                              | DNA methylation                             | Clear cell renal carcinoma tumour cells, adjacent healthy cells | Adults     | 23526956  |
| cg20785459 | Glycemic load (overweight/obese)  | Clear cell renal carcinoma                              | DNA methylation                             | Clear cell renal carcinoma tumour cells, adjacent healthy cells | Adults     | 23526956  |
| cg14403090 | Glycemic load (overweight/obese)  | Clear cell renal carcinoma                              | DNA methylation                             | Clear cell renal carcinoma tumour cells, adjacent healthy cells | Adults     | 23526956  |
| cg05094137 | Glycemic index (normal weight)    | Clear cell renal carcinoma                              | DNA methylation                             | Clear cell renal carcinoma tumour cells, adjacent healthy cells | Adults     | 23526956  |
| cg00913954 | Glycemic index (overweight/obese) | Clear cell renal carcinoma                              | DNA methylation                             | Clear cell renal carcinoma tumour cells, adjacent healthy cells | Adults     | 23526956  |
| cg14051770 | Glycemic index (normal weight)    | Clear cell renal carcinoma                              | DNA methylation                             | Clear cell renal carcinoma tumour cells, adjacent healthy cells | Adults     | 23526956  |
| cg16086237 | Glycemic load (overweight/obese)  | Clear cell renal carcinoma                              | DNA methylation                             | Clear cell renal carcinoma tumour cells, adjacent healthy cells | Adults     | 23526956  |
| cg16204509 | Glycemic load (overweight/obese)  | Clear cell renal carcinoma                              | DNA methylation                             | Clear cell renal carcinoma tumour cells, adjacent healthy cells | Adults     | 23526956  |
| cg07739369 | Glycemic load (overweight/obese)  | Clear cell renal carcinoma                              | DNA methylation                             | Clear cell renal carcinoma tumour cells, adjacent healthy cells | Adults     | 23526956  |
| cg02795334 | Glycemic index (normal weight)    | Clear cell renal carcinoma                              | DNA methylation                             | Clear cell renal carcinoma tumour cells, adjacent healthy cells | Adults     | 23526956  |
| cg13689560 | Glycemic load (overweight/obese)  | Clear cell renal carcinoma                              | DNA methylation                             | Clear cell renal carcinoma tumour cells, adjacent healthy cells | Adults     | 23526956  |
| cg24128943 | Glycemic load (overweight/obese)  | Clear cell renal carcinoma                              | DNA methylation                             | Clear cell renal carcinoma tumour cells, adjacent healthy cells | Adults     | 23526956  |
| cg06292709 | Glycemic load (overweight/obese)  | Clear cell renal carcinoma                              | DNA methylation                             | Clear cell renal carcinoma tumour cells, adjacent healthy cells | Adults     | 23526956  |
| cg23120601 | Glycemic index (overweight/obese) | Clear cell renal carcinoma                              | DNA methylation                             | Clear cell renal carcinoma tumour cells, adjacent healthy cells | Adults     | 23526956  |
| cg27254338 | Glycemic load (overweight/obese)  | Clear cell renal carcinoma                              | DNA methylation                             | Clear cell renal carcinoma tumour cells, adjacent healthy cells | Adults     | 23526956  |
| cg05413285 | Glycemic index (overweight/obese) | Clear cell renal carcinoma                              | DNA methylation                             | Clear cell renal carcinoma tumour cells, adjacent healthy cells | Adults     | 23526956  |
| cg12463578 | Glycemic load (overweight/obese)  | Clear cell renal carcinoma                              | DNA methylation                             | Clear cell renal carcinoma tumour cells, adjacent healthy cells | Adults     | 23526956  |
| cg03816707 | Glycemic load (overweight/obese)  | Clear cell renal carcinoma                              | DNA methylation                             | Clear cell renal carcinoma tumour cells, adjacent healthy cells | Adults     | 23526956  |
| cg14873515 | Glycemic index (overweight/obese) | Clear cell renal carcinoma                              | DNA methylation                             | Clear cell renal carcinoma tumour cells, adjacent healthy cells | Adults     | 23526956  |
| cg00850068 | Glycemic index (overweight/obese) | Clear cell renal carcinoma                              | DNA methylation                             | Clear cell renal carcinoma tumour cells, adjacent healthy cells | Adults     | 23526956  |
| cg15012214 | Glycemic load (overweight/obese)  | Clear cell renal carcinoma                              | DNA methylation                             | Clear cell renal carcinoma tumour cells, adjacent healthy cells | Adults     | 23526956  |
| cg25367568 | Glycemic load (overweight/obese)  | Clear cell renal carcinoma                              | DNA methylation                             | Clear cell renal carcinoma tumour cells, adjacent healthy cells | Adults     | 23526956  |
| cg25446789 | Glycemic index (overweight/obese) | Clear cell renal carcinoma                              | DNA methylation                             | Clear cell renal carcinoma tumour cells, adjacent healthy cells | Adults     | 23526956  |
| cg19299265 | Glycemic load (overweight/obese)  | Clear cell renal carcinoma                              | DNA methylation                             | Clear cell renal carcinoma tumour cells, adjacent healthy cells | Adults     | 23526956  |
| cg01140247 | Glycemic index (overweight/obese) | Clear cell renal carcinoma                              | DNA methylation                             | Clear cell renal carcinoma tumour cells, adjacent healthy cells | Adults     | 23526956  |
| cg13117164 | Glycemic index (overweight/obese) | Clear cell renal carcinoma                              | DNA methylation                             | Clear cell renal carcinoma tumour cells, adjacent healthy cells | Adults     | 23526956  |
| cg08510234 | Glycemic index (overweight/obese) | Clear cell renal carcinoma                              | DNA methylation                             | Clear cell renal carcinoma tumour cells, adjacent healthy cells | Adults     | 23526956  |
| cg13060970 | Glycemic load (overweight/obese)  | Clear cell renal carcinoma                              | DNA methylation                             | Clear cell renal carcinoma tumour cells, adjacent healthy cells | Adults     | 23526956  |
| cg01723892 | Glycemic load (overweight/obese)  | Clear cell renal carcinoma                              | DNA methylation                             | Clear cell renal carcinoma tumour cells, adjacent healthy cells | Adults     | 23526956  |
| cg13257654 | Glycemic load (overweight/obese)  | Common carotid intima-media thickness                   | DNA methylation                             | Whole blood                                                     | Adults     | NA        |
| cg16097041 | Glycemic load (overweight/obese)  | C-reactive protein                                      | DNA methylation                             | Whole blood                                                     | Geriatrics | 27955697  |
| cg09870200 | Glycemic load (overweight/obese)  | Crohn's disease                                         | DNA methylation                             | Whole blood                                                     | Adults     | 27886173  |
| cg07739369 | Glycemic load (overweight/obese)  | Crohn's disease                                         | DNA methylation                             | Whole blood                                                     | Adults     | 27886173  |
| cg24773560 | Glycemic load (overweight/obese)  | Crohn's disease                                         | DNA methylation                             | Whole blood                                                     | Adults     | 27886173  |
| cg07455279 | Glycemic load (overweight/obese)  | Crohn's disease                                         | DNA methylation                             | Whole blood                                                     | Adults     | 27886173  |
| cg16279786 | Glycemic load (overweight/obese)  | Crohn's disease                                         | DNA methylation                             | Whole blood                                                     | Adults     | 27886173  |
| cg21462596 | Glycemic load (overweight/obese)  | Crohn's disease                                         | DNA methylation                             | Whole blood                                                     | Adults     | 27886173  |
| cg08262002 | Glycemic index (overweight/obese) | Crohn's disease                                         | DNA methylation                             | Whole blood                                                     | Adults     | 27886173  |
| cg13689560 | Glycemic load (overweight/obese)  | Current versus never smoking                            | DNA methylation                             | CD4+ T cells, monocytes                                         | Adults     | 27651444  |
| cg10672416 | Glycemic load (overweight/obese)  | Current versus never smoking                            | DNA methylation                             | CD4+ T cells, monocytes                                         | Adults     | 27651444  |
| cg02054431 | Glycemic index (overweight/obese) | Current versus never smoking                            | DNA methylation                             | CD4+ T cells, monocytes                                         | Adults     | 27651444  |
| cg18503679 | Glycemic load (overweight/obese)  | Current versus never smoking                            | DNA methylation                             | CD4+ T cells, monocytes                                         | Adults     | 27651444  |
| cg11105358 | Glycemic load (overweight/obese)  | Current versus never smoking                            | DNA methylation                             | CD4+ T cells, monocytes                                         | Adults     | 27651444  |
| cg12463578 | Glycemic load (overweight/obese)  | Current versus never smoking                            | DNA methylation                             | CD4+ T cells, monocytes                                         | Adults     | 27651444  |
| cg07016556 | Glycemic load (overweight/obese)  | Current versus never smoking                            | DNA methylation                             | CD4+ T cells, monocytes                                         | Adults     | 27651444  |
| cg08262002 | Glycemic index (overweight/obese) | Current versus never smoking                            | DNA methylation                             | CD4+ T cells, monocytes                                         | Adults     | 27651444  |
| cg18503679 | Glycemic load (overweight/obese)  | Current vs never smoking                                | DNA methylation                             | Whole blood                                                     | Adults     | 28225026  |
| cg25446789 | Glycemic index (overweight/obese) | Current vs never smoking                                | DNA methylation                             | Whole blood                                                     | Adults     | 28225026  |
| cg27260684 | Glycemic load (overweight/obese)  | DNA methylation                                         | M32397_3-hydroxy-2-ethylpropanoate          | Whole blood                                                     | Adults     | 24014485  |
| cg27260684 | Glycemic load (overweight/obese)  | DNA methylation                                         | M32397_3-hydroxy-2-ethylpropanoate          | Whole blood                                                     | Adults     | 24014485  |
| cg17147781 | Glycemic index (overweight/obese) | DNA methylation                                         | 1-hour glucose                              | Cord blood                                                      | Infants    | 33315971  |
| cg24054511 | Glycemic load (overweight/obese)  | DNA methylation                                         | Alcohol consumption                         | Whole blood                                                     | Adults     | 21789449  |
| cg13257654 | Glycemic load (overweight/obese)  | DNA methylation                                         | Alcohol consumption                         | Whole blood                                                     | Adults     | 31789449  |
| cg21081175 | Glycemic load (overweight/obese)  | DNA methylation                                         | estimated glomerular filtration rate (eGFR) | Whole blood                                                     | Adults     | 33931109  |
| cg03058038 | Glycemic load (overweight/obese)  | DNA methylation                                         | Nitrogen dioxide exposure                   | Whole blood                                                     | Adults     | 29410382  |
| cg03058038 | Glycemic load (overweight/obese)  | DNA methylation                                         | Maternal overweight/obesity                 | Cord blood                                                      | Infants    | 29016858  |
| cg06652210 | Glycemic load (overweight/obese)  | DNA methylation                                         | M32388_dodecanedioate                       | Whole blood                                                     | Adults     | 24014485  |
| cg22681041 | Glycemic load (overweight/obese)  | DNA methylation                                         | Crohn's disease                             | Whole blood                                                     | Children   | 30779925  |
| cg01326048 | Glycemic load (overweight/obese)  | DNA methylation                                         | Birthweight                                 | Cord blood                                                      | Infants    | 31015461  |

|            |                                   |                                 |                             |             |          |          |
|------------|-----------------------------------|---------------------------------|-----------------------------|-------------|----------|----------|
| cg08657492 | Glycemic index (overweight/obese) | DNA methylation                 | Alcohol consumption         | Whole blood | Adults   | 31789449 |
| cg24332002 | Glycemic load (overweight/obese)  | DNA methylation                 | Birthweight                 | Cord blood  | Infants  | 31015461 |
| cg24773560 | Glycemic load (overweight/obese)  | DNA methylation                 | Alcohol consumption         | Whole blood | Adults   | 31789449 |
| cg24773560 | Glycemic load (overweight/obese)  | DNA methylation                 | Crohn's disease             | Whole blood | Children | 30779925 |
| cg17457937 | Glycemic index (overweight/obese) | DNA methylation                 | Alcohol consumption         | Whole blood | Adults   | 31789449 |
| cg15645685 | Glycemic index (overweight/obese) | DNA methylation                 | Alcohol consumption         | Whole blood | Adults   | 31789449 |
| cg02054431 | Glycemic index (overweight/obese) | DNA methylation                 | Alcohol consumption         | Whole blood | Adults   | 31789449 |
| cg23889772 | Glycemic index (overweight/obese) | DNA methylation                 | Alcohol consumption         | Whole blood | Adults   | 31789449 |
| cg07562888 | Glycemic load (overweight/obese)  | DNA methylation                 | Alcohol consumption         | Whole blood | Adults   | 31789449 |
| cg25938610 | Glycemic load (overweight/obese)  | DNA methylation                 | Maternal body mass index    | Cord blood  | Infants  | 29016858 |
| cg25970291 | Glycemic load (overweight/obese)  | DNA methylation                 | Alcohol consumption         | Whole blood | Adults   | 31789449 |
| cg03432618 | Glycemic index (overweight/obese) | DNA methylation                 | Autistic Traits             | Cord blood  | Infants  | 31346403 |
| cg20775162 | Glycemic index (overweight/obese) | DNA methylation                 | Maternal body mass index    | Cord blood  | Infants  | 29016858 |
| cg20775162 | Glycemic index (overweight/obese) | DNA methylation                 | Nitrogen dioxide exposure   | Whole blood | Adults   | 29410382 |
| cg15012214 | Glycemic load (overweight/obese)  | DNA methylation                 | Alcohol consumption         | Whole blood | Adults   | 31789449 |
| cg08934660 | Glycemic load (overweight/obese)  | DNA methylation                 | Maternal body mass index    | Cord blood  | Infants  | 29016858 |
| cg08934660 | Glycemic load (overweight/obese)  | DNA methylation                 | Nitrogen dioxide exposure   | Whole blood | Adults   | 29410382 |
| cg08934660 | Glycemic load (overweight/obese)  | DNA methylation                 | Maternal overweight/obesity | Cord blood  | Infants  | 29016858 |
| cg25367568 | Glycemic load (overweight/obese)  | DNA methylation                 | Maternal overweight/obesity | Cord blood  | Infants  | 29016858 |
| cg08262002 | Glycemic index (overweight/obese) | DNA methylation                 | Nitrogen dioxide exposure   | Whole blood | Adults   | 29410382 |
| cg08262002 | Glycemic index (overweight/obese) | DNA methylation                 | Maternal overweight/obesity | Cord blood  | Infants  | 29016858 |
| cg10807894 | Glycemic index (overweight/obese) | DNA methylation                 | Maternal body mass index    | Cord blood  | Infants  | 29016858 |
| cg10807894 | Glycemic index (overweight/obese) | DNA methylation                 | Maternal overweight/obesity | Whole blood | Adults   | 29410382 |
| cg16097041 | Glycemic load (overweight/obese)  | DNA methylation                 | Crohn's disease             | Whole blood | Children | 30779925 |
| cg16097041 | Glycemic load (overweight/obese)  | DNA methylation                 | Crohn's disease             | Whole blood | Children | 30779925 |
| cg16097041 | Glycemic load (overweight/obese)  | DNA methylation                 | Birthweight                 | Cord blood  | Infants  | 31015461 |
| cg04057642 | Glycemic index (overweight/obese) | DNA methylation                 | Birthweight                 | Cord blood  | Infants  | 33184255 |
| cg16602747 | Glycemic load (overweight/obese)  | DNA methylation                 | ADHD                        | Whole blood | Adults   | 30343628 |
| cg01911077 | Glycemic index (overweight/obese) | DNA methylation                 | Nitrogen dioxide exposure   | Whole blood | Adults   | 29410382 |
| cg01911077 | Glycemic index (overweight/obese) | DNA methylation                 | Birthweight                 | Cord blood  | Infants  | 31015461 |
| cg08161480 | Glycemic load (overweight/obese)  | DNA methylation                 | M32388_dodecanedioate       | Whole blood | Adults   | 24014485 |
| cg02291010 | Glycemic load (overweight/obese)  | DNA methylation                 | Alcohol consumption         | Whole blood | Adults   | 31789449 |
| cg24504349 | Glycemic load (overweight/obese)  | DNA methylation                 | Nitrogen dioxide exposure   | Whole blood | Adults   | 29410382 |
| cg01723892 | Glycemic load (overweight/obese)  | DNA methylation                 | gestational age             | Whole blood | Infants  | 30966880 |
| cg01723892 | Glycemic load (overweight/obese)  | DNA methylation                 | Birthweight                 | Cord blood  | Infants  | 31015461 |
| cg07723258 | Glycemic load (overweight/obese)  | DNA methylation                 | Nitrogen dioxide exposure   | Whole blood | Adults   | 29410382 |
| cg09435668 | Glycemic load (overweight/obese)  | eosinophila                     | DNA methylation             | nasal polyp | Adults   | 32795589 |
| cg19411557 | Glycemic load (overweight/obese)  | eosinophila                     | DNA methylation             | nasal polyp | Adults   | 32795589 |
| cg23632178 | Glycemic load (overweight/obese)  | eosinophila                     | DNA methylation             | nasal polyp | Adults   | 32795589 |
| cg21165673 | Glycemic load (overweight/obese)  | eosinophila                     | DNA methylation             | nasal polyp | Adults   | 32795589 |
| cg03688771 | Glycemic index (normal weight)    | eosinophila                     | DNA methylation             | nasal polyp | Adults   | 32795589 |
| cg15281496 | Glycemic load (overweight/obese)  | eosinophila                     | DNA methylation             | nasal polyp | Adults   | 32795589 |
| cg19916413 | Glycemic load (overweight/obese)  | eosinophila                     | DNA methylation             | nasal polyp | Adults   | 32795589 |
| cg12332383 | Glycemic index (normal weight)    | eosinophila                     | DNA methylation             | nasal polyp | Adults   | 32795589 |
| cg26112901 | Glycemic load (overweight/obese)  | eosinophila                     | DNA methylation             | nasal polyp | Adults   | 32795589 |
| cg24773560 | Glycemic load (normal weight)     | eosinophila                     | DNA methylation             | nasal polyp | Adults   | 32795589 |
| cg22138408 | Glycemic load (normal weight)     | eosinophila                     | DNA methylation             | nasal polyp | Adults   | 32795589 |
| cg04349494 | Glycemic index (overweight/obese) | eosinophila                     | DNA methylation             | nasal polyp | Adults   | 32795589 |
| cg17866376 | Glycemic load (overweight/obese)  | eosinophila                     | DNA methylation             | nasal polyp | Adults   | 32795589 |
| cg23562160 | Glycemic load (overweight/obese)  | eosinophila                     | DNA methylation             | nasal polyp | Adults   | 32795589 |
| cg23674806 | Glycemic load (normal weight)     | eosinophila                     | DNA methylation             | nasal polyp | Adults   | 32795589 |
| cg19423170 | Glycemic load (overweight/obese)  | eosinophila                     | DNA methylation             | nasal polyp | Adults   | 32795589 |
| cg10304160 | Glycemic index (overweight/obese) | eosinophila                     | DNA methylation             | nasal polyp | Adults   | 32795589 |
| cg01345076 | Glycemic index (normal weight)    | eosinophila                     | DNA methylation             | nasal polyp | Adults   | 32795589 |
| cg10807894 | Glycemic index (overweight/obese) | eosinophila                     | DNA methylation             | nasal polyp | Adults   | 32795589 |
| cg21339736 | Glycemic index (overweight/obese) | eosinophila                     | DNA methylation             | nasal polyp | Adults   | 32795589 |
| cg03077077 | Glycemic index (overweight/obese) | eosinophila                     | DNA methylation             | nasal polyp | Adults   | 32795589 |
| cg14297063 | Glycemic load (overweight/obese)  | eosinophila                     | DNA methylation             | nasal polyp | Adults   | 32795589 |
| cg08064292 | Glycemic load (overweight/obese)  | Fetal alcohol spectrum disorder | DNA methylation             | Buccal      | Children | 27358653 |
| cg05761971 | Glycemic load (overweight/obese)  | Fetal intolerance of labor      | DNA methylation             | Whole blood | Adults   | 29235940 |
| cg05040501 | Glycemic load (overweight/obese)  | Fetal vs adult liver            | DNA methylation             | Liver       | NA       | 25282492 |
| cg08064292 | Glycemic load (overweight/obese)  | Fetal vs adult liver            | DNA methylation             | Liver       | NA       | 25282492 |
| cg04872848 | Glycemic load (overweight/obese)  | Fetal vs adult liver            | DNA methylation             | Liver       | NA       | 25282492 |
| cg25603927 | Glycemic index (overweight/obese) | Fetal vs adult liver            | DNA methylation             | Liver       | NA       | 25282492 |
| cg00683332 | Glycemic load (overweight/obese)  | Fetal vs adult liver            | DNA methylation             | Liver       | NA       | 25282492 |
| cg00913954 | Glycemic index (overweight/obese) | Fetal vs adult liver            | DNA methylation             | Liver       | NA       | 25282492 |
| cg14360448 | Glycemic load (overweight/obese)  | Fetal vs adult liver            | DNA methylation             | Liver       | NA       | 25282492 |
| cg24147838 | Glycemic index (normal weight)    | Fetal vs adult liver            | DNA methylation             | Liver       | NA       | 25282492 |
| cg10672416 | Glycemic load (overweight/obese)  | Fetal vs adult liver            | DNA methylation             | Liver       | NA       | 25282492 |
| cg16555188 | Glycemic load (overweight/obese)  | Fetal vs adult liver            | DNA methylation             | Liver       | NA       | 25282492 |
| cg23889772 | Glycemic index (overweight/obese) | Fetal vs adult liver            | DNA methylation             | Liver       | NA       | 25282492 |
| cg24968692 | Glycemic load (overweight/obese)  | Fetal vs adult liver            | DNA methylation             | Liver       | NA       | 25282492 |
| cg08529295 | Glycemic index (overweight/obese) | Fetal vs adult liver            | DNA methylation             | Liver       | NA       | 25282492 |
| cg24823222 | Glycemic load (overweight/obese)  | Fetal vs adult liver            | DNA methylation             | Whole blood | Adults   | 25282492 |
| cg24378421 | Glycemic index (overweight/obese) | Fetal vs adult liver            | DNA methylation             | Liver       | NA       | 25282492 |
| cg08121652 | Glycemic load (overweight/obese)  | Fetal vs adult liver            | DNA methylation             | Liver       | NA       | 25282492 |
| cg25970491 | Glycemic load (overweight/obese)  | Fetal vs adult liver            | DNA methylation             | Liver       | NA       | 25282492 |
| cg07345108 | Glycemic load (overweight/obese)  | Fetal vs adult liver            | DNA methylation             | Liver       | NA       | 25282492 |
| cg15162330 | Glycemic load (overweight/obese)  | Fetal vs adult liver            | DNA methylation             | Liver       | NA       | 25282492 |
| cg03605666 | Glycemic load (overweight/obese)  | Fetal vs adult liver            | DNA methylation             | Liver       | NA       | 25282492 |
| cg25446789 | Glycemic index (overweight/obese) | Fetal vs adult liver            | DNA methylation             | Liver       | NA       | 25282492 |
| cg19405177 | Glycemic load (overweight/obese)  | Fetal vs adult liver            | DNA methylation             | Liver       | NA       | 25282492 |
| cg08128087 | Glycemic index (overweight/obese) | Fetal vs adult liver            | DNA methylation             | Liver       | NA       | 25282492 |
| cg11613450 | Glycemic load (overweight/obese)  | Fetal vs adult liver            | DNA methylation             | Liver       | NA       | 25282492 |
| cg13171764 | Glycemic index (overweight/obese) | Fetal vs adult liver            | DNA methylation             | Liver       | NA       | 25282492 |
| cg13060770 | Glycemic load (overweight/obese)  | Fetal vs adult liver            | DNA methylation             | Liver       | NA       | 25282492 |
| cg01723892 | Glycemic load (overweight/obese)  | Fetal vs adult liver            | DNA methylation             | Liver       | NA       | 25282492 |



|            |                                   |                                                                  |                 |                         |         |          |
|------------|-----------------------------------|------------------------------------------------------------------|-----------------|-------------------------|---------|----------|
| cg07151406 | Glycemic index (overweight/obese) | Fetal vs adult liver                                             | DNA methylation | Liver                   | NA      | 25282492 |
| cg18503679 | Glycemic load (overweight/obese)  | Former versus newer smoking                                      | DNA methylation | CD4+ T cells, monocytes | Adults  | 27651444 |
| cg08262002 | Glycemic index (overweight/obese) | Former versus newer smoking                                      | DNA methylation | CD4+ T cells, monocytes | Adults  | 27651444 |
| cg21322819 | Glycemic index (normal weight)    | Former versus newer smoking                                      | DNA methylation | CD4+ T cells, monocytes | Adults  | 27651444 |
| cg02291010 | Glycemic load (overweight/obese)  | Gene expression of AFFYmetrix ID: 2821194 (gene symbol: CAST)    | DNA methylation | Whole blood             | Adults  | 33752734 |
| cg12463578 | Glycemic load (overweight/obese)  | Gene expression of AFFYmetrix ID: 3042789 (gene symbol: GABRR1)  | DNA methylation | Whole blood             | Adults  | 33752734 |
| cg17457637 | Glycemic index (overweight/obese) | Gene expression of AFFYmetrix ID: 3157901 (gene symbol: MIR196B) | DNA methylation | Whole blood             | Adults  | 33752734 |
| cg21900799 | Glycemic load (overweight/obese)  | Gene expression of AFFYmetrix ID: 3157901 (gene symbol: PLEC)    | DNA methylation | Whole blood             | Adults  | 33752734 |
| cg22760684 | Glycemic load (overweight/obese)  | Gestational age                                                  | DNA methylation | Cord blood              | Infants | 27717397 |
| cg16711866 | Glycemic load (overweight/obese)  | Gestational age                                                  | DNA methylation | Cord blood              | Infants | 27717397 |
| cg00718983 | Glycemic load (overweight/obese)  | Gestational age                                                  | DNA methylation | Fetal brain             | NA      | 25650246 |
| cg11751808 | Glycemic load (overweight/obese)  | Gestational age                                                  | DNA methylation | Fetal brain             | NA      | 25650246 |
| cg19706472 | Glycemic index (overweight/obese) | Gestational age                                                  | DNA methylation | Fetal brain             | NA      | 25650246 |
| cg20785459 | Glycemic load (overweight/obese)  | Gestational age                                                  | DNA methylation | Cord blood              | Infants | 27717397 |
| cg00415993 | Glycemic load (overweight/obese)  | Gestational age                                                  | DNA methylation | Cord blood              | Infants | 27717397 |
| cg14403090 | Glycemic load (overweight/obese)  | Gestational age                                                  | DNA methylation | Fetal brain             | NA      | 25650246 |
| cg26272214 | Glycemic load (overweight/obese)  | Gestational age                                                  | DNA methylation | Fetal brain             | NA      | 25650246 |
| cg24065451 | Glycemic load (overweight/obese)  | Gestational age                                                  | DNA methylation | Fetal brain             | NA      | 25650246 |
| cg05094137 | Glycemic index (normal weight)    | Gestational age                                                  | DNA methylation | Cord blood              | Infants | 27717397 |
| cg05094137 | Glycemic index (normal weight)    | Gestational age                                                  | DNA methylation | Fetal brain             | NA      | 25650246 |
| cg09870200 | Glycemic load (overweight/obese)  | Gestational age                                                  | DNA methylation | Cord blood              | Infants | 33564054 |
| cg15497749 | Glycemic load (overweight/obese)  | Gestational age                                                  | DNA methylation | Fetal brain             | NA      | 25650246 |
| cg00913954 | Glycemic index (overweight/obese) | Gestational age                                                  | DNA methylation | Fetal brain             | NA      | 25650246 |
| cg00913954 | Glycemic index (overweight/obese) | Gestational age                                                  | DNA methylation | Cord blood              | Infants | 27717397 |
| cg07739369 | Glycemic load (overweight/obese)  | Gestational age                                                  | DNA methylation | Cord blood              | Infants | 27717397 |
| cg07739369 | Glycemic load (overweight/obese)  | Gestational age                                                  | DNA methylation | Fetal brain             | NA      | 25650246 |
| cg07739369 | Glycemic load (overweight/obese)  | Gestational age                                                  | DNA methylation | Cord blood              | Infants | 33564054 |
| cg24332002 | Glycemic load (overweight/obese)  | Gestational age                                                  | DNA methylation | Cord blood              | Infants | 33564054 |
| cg24332002 | Glycemic load (overweight/obese)  | Gestational age                                                  | DNA methylation | Cord blood              | Infants | 27717397 |
| cg11893951 | Glycemic index (overweight/obese) | Gestational age                                                  | DNA methylation | Cord blood              | Infants | 27717397 |
| cg24773560 | Glycemic load (overweight/obese)  | Gestational age                                                  | DNA methylation | Cord blood              | Infants | 33564054 |
| cg13689560 | Glycemic load (overweight/obese)  | Gestational age                                                  | DNA methylation | Cord blood              | Infants | 27717397 |
| cg13689560 | Glycemic load (overweight/obese)  | Gestational age                                                  | DNA methylation | Cord blood              | Infants | 33564054 |
| cg22647970 | Glycemic load (overweight/obese)  | Gestational age                                                  | DNA methylation | Fetal brain             | NA      | 25650246 |
| cg06292709 | Glycemic load (overweight/obese)  | Gestational age                                                  | DNA methylation | Fetal brain             | NA      | 25650246 |
| cg10072416 | Glycemic load (overweight/obese)  | Gestational age                                                  | DNA methylation | Cord blood              | Infants | 27717397 |
| cg15309953 | Glycemic load (overweight/obese)  | Gestational age                                                  | DNA methylation | Fetal brain             | NA      | 25650246 |
| cg11380667 | Glycemic load (overweight/obese)  | Gestational age                                                  | DNA methylation | Fetal brain             | NA      | 25650246 |
| cg02090929 | Glycemic load (overweight/obese)  | Gestational age                                                  | DNA methylation | Cord blood              | Infants | 27717397 |
| cg07562888 | Glycemic load (overweight/obese)  | Gestational age                                                  | DNA methylation | Fetal brain             | NA      | 25650246 |
| cg05413285 | Glycemic index (overweight/obese) | Gestational age                                                  | DNA methylation | Fetal brain             | NA      | 25650246 |
| cg12463578 | Glycemic load (overweight/obese)  | Gestational age                                                  | DNA methylation | Cord blood              | Infants | 27717397 |
| cg12463578 | Glycemic load (overweight/obese)  | Gestational age                                                  | DNA methylation | Fetal brain             | NA      | 25650246 |
| cg12463578 | Glycemic load (overweight/obese)  | Gestational age                                                  | DNA methylation | Cord blood              | Infants | 27717397 |
| cg07016556 | Glycemic load (overweight/obese)  | Gestational age                                                  | DNA methylation | Fetal brain             | NA      | 25650246 |
| cg19830372 | Glycemic load (overweight/obese)  | Gestational age                                                  | DNA methylation | Cord blood              | Infants | 33564054 |
| cg06540283 | Glycemic load (overweight/obese)  | Gestational age                                                  | DNA methylation | Fetal brain             | NA      | 25650246 |
| cg08121652 | Glycemic load (overweight/obese)  | Gestational age                                                  | DNA methylation | Fetal brain             | NA      | 25650246 |
| cg13679804 | Glycemic index (normal weight)    | Gestational age                                                  | DNA methylation | Cord blood              | Infants | 27717397 |
| cg07345108 | Glycemic load (overweight/obese)  | Gestational age                                                  | DNA methylation | Cord blood              | Infants | 33564054 |
| cg07345108 | Glycemic load (overweight/obese)  | Gestational age                                                  | DNA methylation | Cord blood              | Infants | 27717397 |
| cg14873515 | Glycemic load (overweight/obese)  | Gestational age                                                  | DNA methylation | Cord blood              | Infants | 33564054 |
| cg14873515 | Glycemic load (overweight/obese)  | Gestational age                                                  | DNA methylation | Cord blood              | Infants | 27717397 |
| cg14511782 | Glycemic load (overweight/obese)  | Gestational age                                                  | DNA methylation | Cord blood              | Infants | 27717397 |
| cg14435550 | Glycemic load (overweight/obese)  | Gestational age                                                  | DNA methylation | Cord blood              | Infants | 27717397 |
| cg14435550 | Glycemic load (overweight/obese)  | Gestational age                                                  | DNA methylation | Cord blood              | Infants | 33564054 |
| cg16842017 | Glycemic load (overweight/obese)  | Gestational age                                                  | DNA methylation | Fetal brain             | NA      | 25650246 |
| cg08262002 | Glycemic index (overweight/obese) | Gestational age                                                  | DNA methylation | Fetal brain             | NA      | 25650246 |
| cg10807894 | Glycemic index (overweight/obese) | Gestational age                                                  | DNA methylation | Fetal brain             | NA      | 25650246 |
| cg25446789 | Glycemic index (overweight/obese) | Gestational age                                                  | DNA methylation | Cord blood              | Infants | 33564054 |
| cg17175364 | Glycemic load (overweight/obese)  | Gestational age                                                  | DNA methylation | Cord blood              | Infants | 33564054 |
| cg19405177 | Glycemic load (overweight/obese)  | Gestational age                                                  | DNA methylation | Fetal brain             | NA      | 25650246 |
| cg01911077 | Glycemic index (overweight/obese) | Gestational age                                                  | DNA methylation | Cord blood              | Infants | 27717397 |
| cg16735986 | Glycemic load (overweight/obese)  | Gestational age                                                  | DNA methylation | Fetal brain             | NA      | 25650246 |
| cg22097891 | Glycemic index (overweight/obese) | Gestational age                                                  | DNA methylation | Fetal brain             | NA      | 25650246 |
| cg21322819 | Glycemic index (normal weight)    | Gestational age                                                  | DNA methylation | Fetal brain             | NA      | 25650246 |
| cg02483204 | Glycemic index (overweight/obese) | Gestational age                                                  | DNA methylation | Fetal brain             | NA      | 25650246 |
| cg02483204 | Glycemic index (overweight/obese) | Gestational age                                                  | DNA methylation | Cord blood              | Infants | 33564054 |
| cg19299265 | Glycemic load (overweight/obese)  | Gestational age                                                  | DNA methylation | Fetal brain             | NA      | 25650246 |
| cg21813747 | Glycemic load (overweight/obese)  | Gestational age                                                  | DNA methylation | Cord blood              | Infants | 27717397 |
| cg02291010 | Glycemic load (overweight/obese)  | Gestational age                                                  | DNA methylation | Cord blood              | Infants | 27717397 |
| cg24504349 | Glycemic load (overweight/obese)  | Gestational age                                                  | DNA methylation | Cord blood              | Infants | 27717397 |
| cg24504349 | Glycemic load (overweight/obese)  | Gestational age                                                  | DNA methylation | Fetal brain             | NA      | 25650246 |
| cg01140247 | Glycemic index (overweight/obese) | Gestational age                                                  | DNA methylation | Fetal brain             | NA      | 25650246 |
| cg05399244 | Glycemic index (overweight/obese) | Gestational age                                                  | DNA methylation | Cord blood              | Infants | 33564054 |
| cg05399244 | Glycemic index (overweight/obese) | Gestational age                                                  | DNA methylation | Cord blood              | Infants | 27717397 |
| cg13060970 | Glycemic load (overweight/obese)  | Gestational age                                                  | DNA methylation | Cord blood              | Infants | 27717397 |
| cg17828057 | Glycemic index (overweight/obese) | Gestational age                                                  | DNA methylation | Fetal brain             | NA      | 25650246 |
| cg01723892 | Glycemic load (overweight/obese)  | Gestational age                                                  | DNA methylation | Cord blood              | Infants | 27717397 |
| cg01723892 | Glycemic load (overweight/obese)  | Gestational age                                                  | DNA methylation | Cord blood              | Infants | 33564054 |
| cg17747781 | Glycemic index (overweight/obese) | gestational diabetes mellitus                                    | DNA methylation | Cord blood              | Infants | 33151971 |
| cg17747781 | Glycemic index (overweight/obese) | gestational diabetes mellitus                                    | DNA methylation | Cord blood              | Infants | 33151971 |
| cg17747781 | Glycemic index (overweight/obese) | gestational diabetes mellitus                                    | DNA methylation | Cord blood              | Infants | 33151971 |
| cg17747781 | Glycemic index (overweight/obese) | gestational diabetes mellitus                                    | DNA methylation | Cord blood              | Infants | 33151971 |
| cg13422870 | Glycemic index (overweight/obese) | HIV infection                                                    | DNA methylation | Whole blood             | Adults  | 27105112 |
| cg24057041 | Glycemic load (overweight/obese)  | HIV infection                                                    | DNA methylation | Whole blood             | Adults  | 27105112 |
| cg18895813 | Glycemic load (overweight/obese)  | HIV infection                                                    | DNA methylation | Whole blood             | Adults  | 27105112 |

|            |                                   |                                                     |                 |                                                             |            |          |
|------------|-----------------------------------|-----------------------------------------------------|-----------------|-------------------------------------------------------------|------------|----------|
| cg05523449 | Glycemic load (overweight/obese)  | HIV infection                                       | DNA methylation | Whole blood                                                 | Adults     | 27105112 |
| cg06307169 | Glycemic index (overweight/obese) | HIV infection                                       | DNA methylation | Whole blood                                                 | Adults     | 27105112 |
| cg07196761 | Glycemic index (overweight/obese) | HIV infection                                       | DNA methylation | Whole blood                                                 | Adults     | 27105112 |
| cg25074751 | Glycemic index (overweight/obese) | HIV infection                                       | DNA methylation | Whole blood                                                 | Adults     | 27105112 |
| cg01245191 | Glycemic load (overweight/obese)  | HIV infection                                       | DNA methylation | Whole blood                                                 | Adults     | 27105112 |
| cg11544106 | Glycemic load (overweight/obese)  | HIV infection                                       | DNA methylation | Whole blood                                                 | Adults     | 27105112 |
| cg08529295 | Glycemic index (overweight/obese) | HIV infection                                       | DNA methylation | Whole blood                                                 | Adults     | 27105112 |
| cg21792018 | Glycemic load (overweight/obese)  | HIV infection                                       | DNA methylation | Whole blood                                                 | Adults     | 27105112 |
| cg02129962 | Glycemic load (overweight/obese)  | HIV infection                                       | DNA methylation | Whole blood                                                 | Adults     | 27105112 |
| cg26380697 | Glycemic load (overweight/obese)  | HIV infection                                       | DNA methylation | Whole blood                                                 | Adults     | 27105112 |
| cg00798497 | Glycemic load (overweight/obese)  | HIV infection                                       | DNA methylation | Whole blood                                                 | Adults     | 27105112 |
| cg25367568 | Glycemic load (overweight/obese)  | HIV infection                                       | DNA methylation | Whole blood                                                 | Adults     | 27105112 |
| cg15196147 | Glycemic load (overweight/obese)  | HIV infection                                       | DNA methylation | Whole blood                                                 | Adults     | 27105112 |
| cg09427745 | Glycemic load (overweight/obese)  | HIV infection                                       | DNA methylation | Whole blood                                                 | Adults     | 27105112 |
| cg01911077 | Glycemic index (overweight/obese) | HIV infection                                       | DNA methylation | Whole blood                                                 | Adults     | 27105112 |
| cg24040966 | Glycemic load (overweight/obese)  | HIV infection                                       | DNA methylation | Whole blood                                                 | Adults     | 27105112 |
| cg06357940 | Glycemic index (overweight/obese) | HIV infection                                       | DNA methylation | Whole blood                                                 | Adults     | 27105112 |
| cg27367526 | Glycemic index (overweight/obese) | homocysteine GRS                                    | DNA methylation | Whole blood                                                 | Adults     | 29084233 |
| cg24332002 | Glycemic load (overweight/obese)  | Hypertensive disorders of pregnancy                 | DNA methylation | Cord blood                                                  | Infants    | 31230546 |
| cg24332002 | Glycemic load (overweight/obese)  | Hypertensive disorders of pregnancy                 | DNA methylation | Cord blood                                                  | Infants    | 31230546 |
| cg08121652 | Glycemic load (overweight/obese)  | Hypertensive disorders of pregnancy                 | DNA methylation | Cord blood                                                  | Infants    | 31230546 |
| cg01140247 | Glycemic index (overweight/obese) | Hypertensive disorders of pregnancy                 | DNA methylation | Cord blood                                                  | Infants    | 31230546 |
| cg01723892 | Glycemic load (overweight/obese)  | Hypertensive disorders of pregnancy                 | DNA methylation | Cord blood                                                  | Infants    | 31230546 |
| cg01723892 | Glycemic load (overweight/obese)  | Hypertensive disorders of pregnancy                 | DNA methylation | Cord blood                                                  | Infants    | 31230546 |
| cg10196042 | Glycemic load (overweight/obese)  | Inflammatory bowel disease                          | DNA methylation | Whole blood                                                 | Adults     | 27886173 |
| cg24735660 | Glycemic load (overweight/obese)  | Inflammatory bowel disease                          | DNA methylation | Whole blood                                                 | Adults     | 27886173 |
| cg16279786 | Glycemic load (overweight/obese)  | Inflammatory bowel disease                          | DNA methylation | Whole blood                                                 | Adults     | 27886173 |
| cg21462596 | Glycemic load (overweight/obese)  | Inflammatory bowel disease                          | DNA methylation | Whole blood                                                 | Adults     | 27886173 |
| cg08415382 | Glycemic load (overweight/obese)  | Maternal body mass index                            | DNA methylation | Cord blood                                                  | Infants    | 33517419 |
| cg05423392 | Glycemic load (overweight/obese)  | Maternal plasma folate                              | DNA methylation | Cord blood                                                  | Infants    | 26861414 |
| cg21420674 | Glycemic index (overweight/obese) | Maternal plasma folate                              | DNA methylation | Cord blood                                                  | Infants    | 26861414 |
| cg18895813 | Glycemic load (overweight/obese)  | maternal serum polyfluoroalkyl exposure (PFDA)      | DNA methylation | Cord blood                                                  | Infants    | 33356526 |
| cg07341220 | Glycemic index (overweight/obese) | Maternal smoking in pregnancy                       | DNA methylation | Cord blood                                                  | Infants    | 27040690 |
| cg24617171 | Glycemic load (overweight/obese)  | Maternal smoking in pregnancy                       | DNA methylation | Cord blood                                                  | Infants    | 27040690 |
| cg13689560 | Glycemic load (overweight/obese)  | Maternal smoking in pregnancy                       | DNA methylation | Cord blood                                                  | Infants    | 27040690 |
| cg13689560 | Glycemic load (overweight/obese)  | Maternal smoking in pregnancy                       | DNA methylation | Cord blood                                                  | Infants    | 27040690 |
| cg13689560 | Glycemic load (overweight/obese)  | Maternal smoking in pregnancy                       | DNA methylation | Cord blood                                                  | Infants    | 27040690 |
| cg02054431 | Glycemic index (overweight/obese) | Maternal smoking in pregnancy                       | DNA methylation | Cord blood                                                  | Infants    | 27040690 |
| cg11613450 | Glycemic load (overweight/obese)  | Maternal smoking in pregnancy                       | DNA methylation | Cord blood                                                  | Infants    | 27040690 |
| cg05768032 | Glycemic load (overweight/obese)  | Mortality                                           | DNA methylation | Whole blood                                                 | Geriatrics | 29419728 |
| cg00910355 | Glycemic load (overweight/obese)  | Mortality                                           | DNA methylation | Whole blood                                                 | Geriatrics | 29419728 |
| cg14297063 | Glycemic load (overweight/obese)  | Mortality                                           | DNA methylation | Whole blood                                                 | Geriatrics | 30736869 |
| cg10341940 | Glycemic load (overweight/obese)  | Optimal NICU Network Neurobehavioural Scale Profile | DNA methylation | Buccal cells                                                | Infants    | 31004082 |
| cg00913954 | Glycemic index (overweight/obese) | Pancreatic ductal adenocarcinoma                    | DNA methylation | Pancreatic ductal adenocarcinoma, adjacent nontransformed p | NA         | 24500968 |
| cg07739369 | Glycemic load (overweight/obese)  | Pancreatic ductal adenocarcinoma                    | DNA methylation | Pancreatic ductal adenocarcinoma, adjacent nontransformed p | NA         | 24500968 |
| cg24773560 | Glycemic load (overweight/obese)  | Pancreatic ductal adenocarcinoma                    | DNA methylation | Pancreatic ductal adenocarcinoma, adjacent nontransformed p | NA         | 24500968 |
| cg07562888 | Glycemic load (overweight/obese)  | Pancreatic ductal adenocarcinoma                    | DNA methylation | Pancreatic ductal adenocarcinoma, adjacent nontransformed p | NA         | 24500968 |
| cg00064888 | Glycemic load (overweight/obese)  | Pancreatic ductal adenocarcinoma                    | DNA methylation | Pancreatic ductal adenocarcinoma, adjacent nontransformed p | NA         | 24500968 |
| cg25446789 | Glycemic index (overweight/obese) | Pancreatic ductal adenocarcinoma                    | DNA methylation | Pancreatic ductal adenocarcinoma, adjacent nontransformed p | NA         | 24500968 |
| cg01723892 | Glycemic load (overweight/obese)  | Pancreatic ductal adenocarcinoma                    | DNA methylation | Pancreatic ductal adenocarcinoma, adjacent nontransformed p | NA         | 24500968 |
| cg06870764 | Glycemic load (overweight/obese)  | Papuan ancestry                                     | DNA methylation | Whole blood                                                 | Adults     | 32453742 |
| cg20101433 | Glycemic index (normal weight)    | Papuan ancestry                                     | DNA methylation | Whole blood                                                 | Adults     | 32453742 |
| cg22647970 | Glycemic load (overweight/obese)  | Papuan ancestry                                     | DNA methylation | Whole blood                                                 | Adults     | 32453742 |
| cg05327271 | Glycemic index (normal weight)    | Papuan ancestry                                     | DNA methylation | Whole blood                                                 | Adults     | 32453742 |
| cg00850968 | Glycemic index (overweight/obese) | Papuan ancestry                                     | DNA methylation | Whole blood                                                 | Adults     | 32453742 |
| cg08262002 | Glycemic index (overweight/obese) | Papuan ancestry                                     | DNA methylation | Whole blood                                                 | Adults     | 32453742 |
| cg08951101 | Glycemic index (normal weight)    | Papuan ancestry                                     | DNA methylation | Whole blood                                                 | Adults     | 32453742 |
| cg13060970 | Glycemic load (overweight/obese)  | Papuan ancestry                                     | DNA methylation | Whole blood                                                 | Adults     | 32453742 |
| cg00588621 | Glycemic load (overweight/obese)  | Papuan ancestry                                     | DNA methylation | Whole blood                                                 | Adults     | 32453742 |
| cg10319602 | Glycemic load (overweight/obese)  | Paternal body mass index                            | DNA methylation | Cord blood                                                  | Infants    | 33517419 |
| cg03070777 | Glycemic index (overweight/obese) | Perinatally acquired HIV                            | DNA methylation | Whole blood                                                 | Children   | 31224826 |
| cg24065451 | Glycemic load (overweight/obese)  | Phospholipids to total lipids ratio in LDL          | DNA methylation | Whole blood                                                 | Adults     | NA       |
| cg00913954 | Glycemic index (overweight/obese) | Preeclampsia                                        | DNA methylation | Cord blood                                                  | Infants    | 31230546 |
| cg19405177 | Glycemic load (overweight/obese)  | Preeclampsia                                        | DNA methylation | Cord blood                                                  | Infants    | 31230546 |
| cg01723892 | Glycemic load (overweight/obese)  | Preeclampsia                                        | DNA methylation | Cord blood                                                  | Infants    | 31230546 |
| cg07723258 | Glycemic load (overweight/obese)  | Preeclampsia                                        | DNA methylation | Cord blood                                                  | Infants    | 31230546 |
| cg24617171 | Glycemic load (overweight/obese)  | Prenatal smoke exposure                             | DNA methylation | Cord blood, whole blood                                     | Infants    | 31536415 |
| cg13689560 | Glycemic load (overweight/obese)  | Prenatal smoke exposure                             | DNA methylation | Cord blood, whole blood                                     | Infants    | 31536415 |
| cg02054431 | Glycemic index (overweight/obese) | Prenatal smoke exposure                             | DNA methylation | Cord blood, whole blood                                     | Infants    | 31536415 |
| cg16097041 | Glycemic load (overweight/obese)  | Prenatal smoke exposure                             | DNA methylation | Cord blood, whole blood                                     | Infants    | 31536415 |
| cg11613450 | Glycemic load (overweight/obese)  | Prenatal smoke exposure                             | DNA methylation | Cord blood, whole blood                                     | Infants    | 31536415 |
| cg27260684 | Glycemic load (overweight/obese)  | Primary Sjogrens syndrome                           | DNA methylation | Whole blood                                                 | NA         | 26857698 |
| cg05094137 | Glycemic index (normal weight)    | Primary Sjogrens syndrome                           | DNA methylation | Whole blood                                                 | NA         | 26857698 |
| cg00913954 | Glycemic index (overweight/obese) | Primary Sjogrens syndrome                           | DNA methylation | Whole blood                                                 | NA         | 26857698 |
| cg27367526 | Glycemic index (overweight/obese) | Primary Sjogrens syndrome                           | DNA methylation | Whole blood                                                 | NA         | 26857698 |
| cg13679804 | Glycemic index (normal weight)    | Primary Sjogrens syndrome                           | DNA methylation | Whole blood                                                 | NA         | 26857698 |
| cg07345108 | Glycemic load (overweight/obese)  | Primary Sjogrens syndrome                           | DNA methylation | Whole blood                                                 | NA         | 26857698 |
| cg26300597 | Glycemic load (overweight/obese)  | Primary Sjogrens syndrome                           | DNA methylation | Whole blood                                                 | NA         | 26857698 |
| cg08262002 | Glycemic index (overweight/obese) | Primary Sjogrens syndrome                           | DNA methylation | Whole blood                                                 | NA         | 26857698 |
| cg24504349 | Glycemic load (overweight/obese)  | Primary Sjogrens syndrome                           | DNA methylation | Whole blood                                                 | NA         | 26857698 |
| cg05399244 | Glycemic index (overweight/obese) | Primary Sjogrens syndrome                           | DNA methylation | Whole blood                                                 | NA         | 26857698 |
| cg01723892 | Glycemic load (overweight/obese)  | Primary Sjogrens syndrome                           | DNA methylation | Whole blood                                                 | NA         | 26857698 |
| cg20641660 | Glycemic load (overweight/obese)  | Rheumatoid arthritis                                | DNA methylation | Whole blood                                                 | Adults     | 23334450 |
| cg18592561 | Glycemic load (overweight/obese)  | Rheumatoid arthritis                                | DNA methylation | Whole blood                                                 | Adults     | 23334450 |
| cg07040338 | Glycemic index (overweight/obese) | Rheumatoid arthritis                                | DNA methylation | Whole blood                                                 | Adults     | 23334450 |
| cg02783833 | Glycemic load (overweight/obese)  | Rheumatoid arthritis                                | DNA methylation | Whole blood                                                 | Adults     | 23334450 |
| cg13465890 | Glycemic index (overweight/obese) | Rheumatoid arthritis                                | DNA methylation | Whole blood                                                 | Adults     | 23334450 |

|            |                                   |                                            |                 |                |            |          |
|------------|-----------------------------------|--------------------------------------------|-----------------|----------------|------------|----------|
| cg19655128 | Glycemic index (overweight/obese) | Rheumatoid arthritis                       | DNA methylation | Whole blood    | Adults     | 23334450 |
| cg24773560 | Glycemic load (overweight/obese)  | Rheumatoid arthritis                       | DNA methylation | Whole blood    | Adults     | 23334450 |
| cg24128943 | Glycemic load (overweight/obese)  | Rheumatoid arthritis                       | DNA methylation | Whole blood    | Adults     | 23334450 |
| cg04349494 | Glycemic index (overweight/obese) | Rheumatoid arthritis                       | DNA methylation | Whole blood    | Adults     | 23334450 |
| cg22829270 | Glycemic index (normal weight)    | Rheumatoid arthritis                       | DNA methylation | Whole blood    | Adults     | 23334450 |
| cg09436502 | Glycemic load (overweight/obese)  | Rheumatoid arthritis                       | DNA methylation | Whole blood    | Adults     | 23334450 |
| cg27425709 | Glycemic load (overweight/obese)  | Rheumatoid arthritis                       | DNA methylation | Whole blood    | Adults     | 23334450 |
| cg24968692 | Glycemic load (overweight/obese)  | Rheumatoid arthritis                       | DNA methylation | Whole blood    | Adults     | 23334450 |
| cg19605773 | Glycemic load (overweight/obese)  | Rheumatoid arthritis                       | DNA methylation | Whole blood    | Adults     | 23334450 |
| cg15162330 | Glycemic load (overweight/obese)  | Rheumatoid arthritis                       | DNA methylation | Whole blood    | Adults     | 23334450 |
| cg00086498 | Glycemic load (overweight/obese)  | Rheumatoid arthritis                       | DNA methylation | Whole blood    | Adults     | 23334450 |
| cg02479816 | Glycemic index (overweight/obese) | Rheumatoid arthritis                       | DNA methylation | Whole blood    | Adults     | 23334450 |
| cg19522467 | Glycemic load (overweight/obese)  | Rheumatoid arthritis                       | DNA methylation | Whole blood    | Adults     | 23334450 |
| cg08264638 | Glycemic load (normal weight)     | Rheumatoid arthritis                       | DNA methylation | Whole blood    | Adults     | 23334450 |
| cg24652379 | Glycemic index (overweight/obese) | Rheumatoid arthritis                       | DNA methylation | Whole blood    | Adults     | 23334450 |
| cg01723892 | Glycemic load (overweight/obese)  | Rheumatoid arthritis                       | DNA methylation | Whole blood    | Adults     | 23334450 |
| cg27260684 | Glycemic load (overweight/obese)  | Right vs left colon adenomas               | DNA methylation | Colon adenomas | Adults     | 23968178 |
| cg19706472 | Glycemic index (overweight/obese) | Schizophrenia                              | DNA methylation | Whole blood    | Adults     | 33279932 |
| cg19706472 | Glycemic index (overweight/obese) | Schizophrenia                              | DNA methylation | Whole blood    | Adults     | 33279932 |
| cg10343545 | Glycemic load (overweight/obese)  | Schizophrenia                              | DNA methylation | Whole blood    | Adults     | 33279932 |
| cg12832565 | Glycemic index (overweight/obese) | Schizophrenia                              | DNA methylation | Whole blood    | NA         | 27572077 |
| cg26300597 | Glycemic load (overweight/obese)  | Schizophrenia                              | DNA methylation | Whole blood    | Adults     | 33279932 |
| cg06331862 | Glycemic load (overweight/obese)  | Schizophrenia                              | DNA methylation | Whole blood    | Adults     | 33279932 |
| cg24201251 | Glycemic load (overweight/obese)  | Schizophrenia                              | DNA methylation | Whole blood    | Adults     | 33279932 |
| cg24065451 | Glycemic load (overweight/obese)  | Serum high-density lipoprotein cholesterol | DNA methylation | Whole blood    | Geriatrics | 28213390 |
| cg24065451 | Glycemic load (overweight/obese)  | Serum high-density lipoprotein cholesterol | DNA methylation | Whole blood    | Adults     | 28213390 |
| cg14558716 | Glycemic index (overweight/obese) | sex                                        | DNA methylation | Whole blood    | Children   | 33450751 |
| cg20785459 | Glycemic load (overweight/obese)  | sex                                        | DNA methylation | Whole blood    | Children   | 33450751 |
| cg06655190 | Glycemic load (overweight/obese)  | Sex                                        | DNA methylation | Whole blood    | Adults     | 26500701 |
| cg06655190 | Glycemic load (overweight/obese)  | sex                                        | DNA methylation | Whole blood    | Children   | 33450751 |
| cg26272214 | Glycemic load (overweight/obese)  | sex                                        | DNA methylation | Whole blood    | Children   | 33450751 |
| cg26272214 | Glycemic load (overweight/obese)  | Sex                                        | DNA methylation | Placenta       | Infants    | 34044884 |
| cg18592561 | Glycemic load (overweight/obese)  | sex                                        | DNA methylation | Whole blood    | Children   | 33450751 |
| cg24065451 | Glycemic load (overweight/obese)  | Sex                                        | DNA methylation | Whole blood    | Adults     | 26500701 |
| cg19388739 | Glycemic load (overweight/obese)  | sex                                        | DNA methylation | Whole blood    | Children   | 33450751 |
| cg09870200 | Glycemic load (overweight/obese)  | sex                                        | DNA methylation | Whole blood    | Children   | 33450751 |
| cg04872848 | Glycemic load (overweight/obese)  | Sex                                        | DNA methylation | Whole blood    | Adults     | 26500701 |
| cg04872848 | Glycemic load (overweight/obese)  | sex                                        | DNA methylation | Whole blood    | Children   | 33450751 |
| cg24892433 | Glycemic load (overweight/obese)  | sex                                        | DNA methylation | Whole blood    | Children   | 33450751 |
| cg08415582 | Glycemic load (overweight/obese)  | Sex                                        | DNA methylation | Whole blood    | Adults     | 26500701 |
| cg08415582 | Glycemic load (overweight/obese)  | sex                                        | DNA methylation | Whole blood    | Children   | 33450751 |
| cg08415582 | Glycemic load (overweight/obese)  | sex                                        | DNA methylation | Cord blood     | Infants    | 26503366 |
| cg08415582 | Glycemic load (overweight/obese)  | Sex                                        | DNA methylation | Fetal brain    | NA         | 25650246 |
| cg13257654 | Glycemic load (overweight/obese)  | sex                                        | DNA methylation | Whole blood    | Children   | 33450751 |
| cg13551783 | Glycemic load (overweight/obese)  | sex                                        | DNA methylation | Whole blood    | Children   | 33450751 |
| cg07341220 | Glycemic index (overweight/obese) | Sex                                        | DNA methylation | Whole blood    | Adults     | 26500701 |
| cg07341220 | Glycemic index (overweight/obese) | sex                                        | DNA methylation | Whole blood    | Children   | 33450751 |
| cg00913954 | Glycemic index (overweight/obese) | Sex                                        | DNA methylation | Whole blood    | Adults     | 26500701 |
| cg01326048 | Glycemic load (overweight/obese)  | sex                                        | DNA methylation | Whole blood    | Children   | 33450751 |
| cg22068687 | Glycemic load (overweight/obese)  | Sex                                        | DNA methylation | Placenta       | Infants    | 34044884 |
| cg08657492 | Glycemic index (overweight/obese) | Sex                                        | DNA methylation | Placenta       | Infants    | 34044884 |
| cg08657492 | Glycemic index (overweight/obese) | Sex                                        | DNA methylation | Whole blood    | Adults     | 26500701 |
| cg24298476 | Glycemic index (overweight/obese) | Sex                                        | DNA methylation | Whole blood    | Adults     | 26500701 |
| cg24298476 | Glycemic index (overweight/obese) | sex                                        | DNA methylation | Whole blood    | Children   | 33450751 |
| cg02353154 | Glycemic load (overweight/obese)  | sex                                        | DNA methylation | Whole blood    | Children   | 33450751 |
| cg23513183 | Glycemic load (overweight/obese)  | sex                                        | DNA methylation | Whole blood    | Children   | 33450751 |
| cg16204509 | Glycemic load (overweight/obese)  | sex                                        | DNA methylation | Whole blood    | Children   | 33450751 |
| cg14360448 | Glycemic load (overweight/obese)  | sex                                        | DNA methylation | Whole blood    | Children   | 33450751 |
| cg03707256 | Glycemic load (overweight/obese)  | Sex                                        | DNA methylation | Placenta       | Infants    | 34044884 |
| cg17811589 | Glycemic load (overweight/obese)  | sex                                        | DNA methylation | Whole blood    | Children   | 33450751 |
| cg17857637 | Glycemic index (overweight/obese) | Sex                                        | DNA methylation | Whole blood    | Adults     | 26500701 |
| cg13689560 | Glycemic load (overweight/obese)  | sex                                        | DNA methylation | Whole blood    | Children   | 33450751 |
| cg22647970 | Glycemic load (overweight/obese)  | Sex                                        | DNA methylation | Placenta       | Infants    | 34044884 |
| cg15645685 | Glycemic index (overweight/obese) | Sex                                        | DNA methylation | Whole blood    | Geriatrics | 25249537 |
| cg15645685 | Glycemic index (overweight/obese) | Sex                                        | DNA methylation | Whole blood    | Adults     | 26500701 |
| cg15645685 | Glycemic index (overweight/obese) | sex                                        | DNA methylation | Whole blood    | Children   | 33450751 |
| cg27267526 | Glycemic index (overweight/obese) | sex                                        | DNA methylation | Whole blood    | Children   | 33450751 |
| cg06602723 | Glycemic load (overweight/obese)  | sex                                        | DNA methylation | Whole blood    | Children   | 33450751 |
| cg18503679 | Glycemic load (overweight/obese)  | Sex                                        | DNA methylation | Whole blood    | Adults     | 26500701 |
| cg07455279 | Glycemic load (overweight/obese)  | Sex                                        | DNA methylation | Whole blood    | Adults     | 26500701 |
| cg07455279 | Glycemic load (overweight/obese)  | sex                                        | DNA methylation | Whole blood    | Children   | 33450751 |
| cg11105358 | Glycemic load (overweight/obese)  | Sex                                        | DNA methylation | Whole blood    | Adults     | 26500701 |
| cg11105358 | Glycemic load (overweight/obese)  | sex                                        | DNA methylation | Whole blood    | Children   | 33450751 |
| cg27525032 | Glycemic load (overweight/obese)  | Sex                                        | DNA methylation | Whole blood    | Adults     | 26500701 |
| cg27525032 | Glycemic load (overweight/obese)  | Sex                                        | DNA methylation | Whole blood    | Adults     | 26500701 |
| cg27421105 | Glycemic index (overweight/obese) | sex                                        | DNA methylation | Whole blood    | Children   | 33450751 |
| cg16279786 | Glycemic load (overweight/obese)  | sex                                        | DNA methylation | Whole blood    | Children   | 33450751 |
| cg16279786 | Glycemic load (overweight/obese)  | Sex                                        | DNA methylation | Whole blood    | Adults     | 26500701 |
| cg23562160 | Glycemic load (overweight/obese)  | Sex                                        | DNA methylation | Whole blood    | Adults     | 26500701 |
| cg02099929 | Glycemic load (overweight/obese)  | Sex                                        | DNA methylation | Whole blood    | Adults     | 26500701 |
| cg24378421 | Glycemic index (overweight/obese) | Sex                                        | DNA methylation | Whole blood    | Adults     | 26500701 |
| cg24378421 | Glycemic index (overweight/obese) | sex                                        | DNA methylation | Whole blood    | Children   | 33450751 |
| cg05413285 | Glycemic index (overweight/obese) | sex                                        | DNA methylation | Whole blood    | Children   | 33450751 |
| cg25496104 | Glycemic index (overweight/obese) | sex                                        | DNA methylation | Whole blood    | Children   | 33450751 |
| cg03816707 | Glycemic load (overweight/obese)  | Sex                                        | DNA methylation | Whole blood    | Adults     | 26500701 |
| cg03816707 | Glycemic load (overweight/obese)  | sex                                        | DNA methylation | Whole blood    | Children   | 33450751 |
| cg05269359 | Glycemic load (overweight/obese)  | Sex                                        | DNA methylation | Placenta       | Infants    | 34044884 |







[illegible]

| Table S12. Associations between age and sex and GI/GL for the identified CpGs in the TEENDIAB cohort |                        |                        |                       |                       |                             |                             |  |
|------------------------------------------------------------------------------------------------------|------------------------|------------------------|-----------------------|-----------------------|-----------------------------|-----------------------------|--|
| CpG                                                                                                  | Beta coefficient (age) | Beta coefficient (sex) | nominal P-value (age) | nominal P-value (sex) | FDR-corrected P-value (age) | FDR-corrected P-value (sex) |  |
| cg05859578                                                                                           | -4.29E-04              | -4.62E-03              | 6.86E-01              | 9.80E-02              | 1                           | 1                           |  |
| cg08749419                                                                                           | -5.95E-04              | -2.05E-03              | 5.91E-01              | 4.80E-01              | 1                           | 1                           |  |
| cg23120601                                                                                           | -1.18E-03              | -7.90E-04              | 3.84E-01              | 8.25E-01              | 1                           | 1                           |  |
| cg01790002                                                                                           | -2.81E-04              | 4.44E-03               | 7.41E-01              | 4.71E-02              | 1                           | 1                           |  |
| cg20938391                                                                                           | 4.05E-05               | 7.46E-03               | 9.89E-01              | 3.42E-01              | 1                           | 1                           |  |
| cg15645685                                                                                           | -1.07E-03              | 2.90E-02               | 7.07E-01              | 1.49E-04              | 1                           | 0.1577                      |  |
| cg19655128                                                                                           | 6.32E-04               | -3.60E-03              | 6.72E-01              | 3.58E-01              | 1                           | 1                           |  |
| cg08128087                                                                                           | 3.59E-04               | -3.85E-02              | 8.93E-01              | 1.19E-07              | 1                           | 0.0005                      |  |
| cg08893641                                                                                           | 1.20E-04               | -1.34E-03              | 8.47E-01              | 4.1E-01               | 1                           | 1                           |  |
| cg06307169                                                                                           | -1.78E-04              | -1.84E-03              | 6.68E-01              | 8.52E-02              | 1                           | 1                           |  |
| cg0651234                                                                                            | -1.17E-03              | -9.88E-03              | 2.84E-01              | 6.31E-04              | 1                           | 0.4217                      |  |
| cg25074751                                                                                           | 3.72E-05               | -3.50E-04              | 9.07E-01              | 6.73E-01              | 1                           | 1                           |  |
| cg23889772                                                                                           | 4.66E-03               | -3.41E-03              | 2.24E-03              | 3.91E-01              | 1                           | 1                           |  |
| cg08529295                                                                                           | 2.67E-03               | 7.96E-04               | 2.19E-01              | 8.89E-01              | 1                           | 1                           |  |
| cg11893951                                                                                           | 1.11E-03               | -6.96E-03              | 5.37E-01              | 1.38E-01              | 1                           | 1                           |  |
| cg1709645                                                                                            | -5.65E-03              | -1.69E-02              | 8.60E-02              | 4.97E-02              | 1                           | 1                           |  |
| cg02461739                                                                                           | -4.00E-04              | 2.01E-03               | 4.68E-01              | 1.62E-01              | 1                           | 1                           |  |
| cg03077077                                                                                           | 5.19E-03               | 5.09E-03               | 1.52E-01              | 5.90E-01              | 1                           | 1                           |  |
| cg21322819                                                                                           | 1.14E-05               | 4.35E-04               | 9.83E-01              | 7.51E-01              | 1                           | 1                           |  |
| cg07341220                                                                                           | 1.67E-03               | -8.72E-03              | 6.60E-01              | 3.85E-01              | 1                           | 1                           |  |
| cg13117164                                                                                           | 6.95E-04               | 1.77E-03               | 2.31E-01              | 2.44E-01              | 1                           | 1                           |  |
| cg16350249                                                                                           | -4.95E-03              | 2.90E-02               | 7.61E-02              | 6.90E-01              | 1                           | 1                           |  |
| cg13465890                                                                                           | -1.41E-04              | 3.50E-04               | 6.12E-01              | 6.29E-01              | 1                           | 1                           |  |
| cg2742115                                                                                            | 2.99E-03               | 8.40E-03               | 8.30E-02              | 6.35E-02              | 1                           | 1                           |  |
| cg07980773                                                                                           | -2.24E-03              | 3.70E-03               | 2.80E-01              | 4.97E-01              | 1                           | 1                           |  |
| cg17828057                                                                                           | 5.42E-03               | 2.95E-03               | 1.92E-01              | 7.86E-01              | 1                           | 1                           |  |
| cg08743514                                                                                           | 2.95E-05               | -1.03E-04              | 9.67E-01              | 9.56E-01              | 1                           | 1                           |  |
| cg27070405                                                                                           | -6.06E-03              | -8.57E-03              | 2.09E-02              | 2.13E-01              | 1                           | 1                           |  |
| cg03432618                                                                                           | -1.18E-05              | -3.27E-03              | 9.77E-01              | 2.93E-03              | 1                           | 1                           |  |
| cg08906056                                                                                           | 1.68E-04               | -2.52E-03              | 9.34E-01              | 6.34E-01              | 1                           | 1                           |  |
| cg04057642                                                                                           | -6.82E-03              | 1.01E-02               | 6.74E-03              | 1.25E-01              | 1                           | 1                           |  |
| cg16563171                                                                                           | 1.54E-03               | 1.59E-03               | 1.08E-01              | 5.27E-01              | 1                           | 1                           |  |
| cg23239239                                                                                           | 1.29E-04               | -6.40E-04              | 6.90E-01              | 4.49E-01              | 1                           | 1                           |  |
| cg27302237                                                                                           | -5.88E-03              | -1.47E-02              | 7.03E-03              | 9.51E-03              | 1                           | 1                           |  |
| cg25222252                                                                                           | -9.91E-05              | -1.32E-04              | 5.06E-01              | 7.36E-01              | 1                           | 1                           |  |
| cg04813149                                                                                           | -1.09E-03              | -6.57E-04              | 6.49E-02              | 6.70E-01              | 1                           | 1                           |  |
| cg26502715                                                                                           | 3.49E-04               | -4.39E-03              | 5.32E-01              | 3.30E-03              | 1                           | 1                           |  |
| cg02795334                                                                                           | 7.29E-03               | 1.32E-03               | 1.494E-02             | 8.92E-01              | 1                           | 1                           |  |
| cg23979983                                                                                           | 3.80E-03               | -3.56E-02              | 3.78E-01              | 1.92E-03              | 1                           | 0.8564                      |  |
| cg17457637                                                                                           | -5.31E-03              | 7.07E-03               | 3.64E-01              | 6.43E-01              | 1                           | 1                           |  |
| cg04426554                                                                                           | -1.45E-03              | -6.06E-04              | 3.87E-02              | 7.39E-01              | 1                           | 1                           |  |
| cg01530292                                                                                           | -2.07E-03              | -2.71E-03              | 3.55E-01              | 6.42E-01              | 1                           | 1                           |  |
| cg04126424                                                                                           | 8.95E-04               | 6.47E-03               | 7.90E-01              | 4.66E-01              | 1                           | 1                           |  |
| cg22097891                                                                                           | 1.63E-04               | -3.33E-04              | 8.11E-01              | 8.51E-01              | 1                           | 1                           |  |
| cg13422870                                                                                           | -1.54E-04              | -4.56E-03              | 7.87E-01              | 2.60E-03              | 1                           | 1                           |  |
| cg18079823                                                                                           | -2.01E-03              | -2.35E-03              | 1.57E-01              | 5.29E-01              | 1                           | 1                           |  |
| cg1807894                                                                                            | -2.90E-03              | -1.29E-02              | 1.26E-01              | 1.03E-02              | 1                           | 1                           |  |
| cg00774406                                                                                           | 1.91E-03               | -1.11E-03              | 1.39E-01              | 7.42E-01              | 1                           | 1                           |  |
| cg16096180                                                                                           | -8.66E-04              | -8.52E-03              | 5.08E-01              | 1.36E-02              | 1                           | 1                           |  |
| cg19802547                                                                                           | -2.88E-03              | -1.03E-02              | 1.60E-01              | 5.51E-02              | 1                           | 1                           |  |
| cg07976823                                                                                           | -1.84E-03              | -5.24E-03              | 4.14E-01              | 3.73E-01              | 1                           | 1                           |  |
| cg24618945                                                                                           | -3.55E-03              | -7.18E-03              | 1.96E-01              | 3.16E-01              | 1                           | 1                           |  |
| cg16645453                                                                                           | -1.57E-05              | -4.33E-04              | 9.17E-01              | 2.69E-01              | 1                           | 1                           |  |
| cg08160970                                                                                           | -9.26E-04              | -1.61E-03              | 1.63E-01              | 2.99E-01              | 1                           | 1                           |  |
| cg24762053                                                                                           | -7.70E-04              | -5.46E-03              | 6.43E-01              | 2.14E-01              | 1                           | 1                           |  |
| cg00087645                                                                                           | -1.48E-04              | -7.28E-04              | 4.74E-01              | 1.78E-01              | 1                           | 1                           |  |
| cg00850068                                                                                           | 1.34E-04               | 1.03E-03               | 7.89E-01              | 4.34E-01              | 1                           | 1                           |  |
| cg05432558                                                                                           | 7.04E-03               | -2.14E-02              | 1.21E-01              | 7.03E-02              | 1                           | 1                           |  |
| cg02969380                                                                                           | -8.11E-04              | -2.50E-03              | 2.71E-01              | 1.98E-01              | 1                           | 1                           |  |
| cg01160763                                                                                           | -3.17E-03              | 9.32E-03               | 5.84E-02              | 3.30E-02              | 1                           | 1                           |  |
| cg15777599                                                                                           | -1.30E-04              | 4.88E-04               | 5.63E-01              | 4.06E-01              | 1                           | 1                           |  |
| cg02994628                                                                                           | -3.58E-04              | 2.79E-03               | 3.73E-01              | 8.31E-03              | 1                           | 1                           |  |
| cg25603927                                                                                           | -8.92E-03              | -2.50E-02              | 8.65E-02              | 6.62E-02              | 1                           | 1                           |  |
| cg07513425                                                                                           | -7.26E-04              | 5.38E-04               | 3.51E-01              | 7.92E-01              | 1                           | 1                           |  |
| cg2011433                                                                                            | -4.95E-03              | -5.43E-03              | 3.58E-02              | 3.80E-01              | 1                           | 1                           |  |
| cg03116409                                                                                           | -2.62E-06              | -5.38E-04              | 9.89E-01              | 2.78E-01              | 1                           | 1                           |  |
| cg14051770                                                                                           | -3.24E-05              | -1.43E-02              | 9.87E-01              | 5.73E-03              | 1                           | 1                           |  |
| cg02483204                                                                                           | -4.59E-03              | 5.20E-03               | 1.09E-01              | 4.86E-01              | 1                           | 1                           |  |
| cg0895111                                                                                            | -6.05E-03              | -3.92E-03              | 1.16E-02              | 5.35E-01              | 1                           | 1                           |  |
| cg2234391                                                                                            | -7.35E-04              | -1.08E-04              | 1.53E-01              | 9.36E-01              | 1                           | 1                           |  |
| cg1669646                                                                                            | 1.74E-03               | -3.70E-04              | 9.85E-02              | 8.93E-01              | 1                           | 1                           |  |
| cg21339736                                                                                           | 7.32E-04               | 2.19E-04               | 9.14E-02              | 8.47E-01              | 1                           | 1                           |  |
| cg18840037                                                                                           | -5.34E-04              | 1.17E-03               | 2.83E-01              | 3.72E-01              | 1                           | 1                           |  |
| cg08262002                                                                                           | -1.06E-02              | -2.26E-03              | 1.77E-11              | 5.59E-01              | 8.23E-06                    | 1                           |  |
| cg19706472                                                                                           | -1.03E-03              | 1.19E-04               | 6.62E-04              | 8.80E-01              | 1                           | 1                           |  |
| cg02184558                                                                                           | 1.25E-02               | 6.83E-02               | 1.54E-01              | 3.41E-03              | 1                           | 1                           |  |
| cg15415571                                                                                           | -9.03E-04              | 1.71E-03               | 8.18E-02              | 2.09E-01              | 1                           | 1                           |  |
| cg03360656                                                                                           | -2.52E-04              | 9.06E-03               | 8.87E-01              | 5.42E-02              | 1                           | 1                           |  |
| cg19821999                                                                                           | 6.34E-03               | 1.86E-03               | 1.54E-01              | 8.73E-01              | 1                           | 1                           |  |
| cg23811160                                                                                           | 7.82E-04               | -6.50E-03              | 7.71E-01              | 3.58E-01              | 1                           | 1                           |  |
| cg1349674                                                                                            | -5.29E-03              | -6.17E-03              | 2.24E-01              | 5.86E-01              | 1                           | 1                           |  |
| cg17282830                                                                                           | 2.24E-03               | -6.57E-03              | 1.34E-01              | 9.42E-02              | 1                           | 1                           |  |
| cg22460923                                                                                           | 2.63E-05               | 1.20E-02               | 9.84E-01              | 7.47E-04              | 1                           | 0.4702                      |  |
| cg23427404                                                                                           | -5.56E-03              | -1.91E-02              | 1.68E-01              | 7.22E-02              | 1                           | 1                           |  |
| cg25852019                                                                                           | -9.90E-04              | -2.16E-03              | 5.03E-02              | 1.04E-01              | 1                           | 1                           |  |
| cg15264825                                                                                           | -2.84E-03              | -3.58E-03              | 1.44E-01              | 4.78E-01              | 1                           | 1                           |  |
| cg03688771                                                                                           | -8.38E-04              | -7.81E-03              | 6.21E-01              | 8.01E-02              | 1                           | 1                           |  |
| cg07777964                                                                                           | -1.35E-03              | -9.41E-05              | 4.92E-04              | 9.26E-01              | 1                           | 1                           |  |
| cg08380316                                                                                           | -1.76E-03              | 3.04E-03               | 4.38E-01              | 6.07E-01              | 1                           | 1                           |  |
| cg03954353                                                                                           | -5.53E-04              | 9.31E-04               | 4.70E-01              | 6.42E-01              | 1                           | 1                           |  |
| cg03128522                                                                                           | -4.66E-04              | -1.17E-02              | 9.33E-01              | 4.21E-01              | 1                           | 1                           |  |
| cg00719768                                                                                           | 3.65E-03               | 2.91E-03               | 2.27E-01              | 7.12E-01              | 1                           | 1                           |  |
| cg20885621                                                                                           | -9.09E-04              | -5.95E-05              | 1.70E-01              | 9.73E-01              | 1                           | 1                           |  |
| cg19157956                                                                                           | 1.87E-04               | 8.53E-04               | 6.33E-01              | 4.07E-01              | 1                           | 1                           |  |
| cg25934824                                                                                           | -8.39E-05              | -1.15E-03              | 8.74E-01              | 4.08E-01              | 1                           | 1                           |  |
| cg12625126                                                                                           | -1.83E-03              | -5.17E-03              | 1.25E-01              | 9.63E-02              | 1                           | 1                           |  |
| cg04125341                                                                                           | 3.38E-03               | 2.08E-03               | 1.59E-01              | 7.40E-01              | 1                           | 1                           |  |
| cg03827836                                                                                           | -5.55E-04              | 1.84E-03               | 3.38E-01              | 2.24E-01              | 1                           | 1                           |  |
| cg20885078                                                                                           | 7.55E-06               | -2.13E-04              | 9.57E-01              | 5.65E-01              | 1                           | 1                           |  |
| cg02439540                                                                                           | -1.94E-03              | -1.19E-02              | 1.88E-01              | 2.48E-03              | 1                           | 0.9989                      |  |
| cg15432367                                                                                           | 1.23E-03               | 4.05E-03               | 1.67E-01              | 8.18E-02              | 1                           | 1                           |  |
| cg00008075                                                                                           | -1.30E-02              | -8.59E-03              | 8.09E-03              | 5.00E-01              | 1                           | 1                           |  |
| cg01566217                                                                                           | 2.16E-04               | 7.18E-04               | 3.14E-01              | 1.97E-01              | 1                           | 1                           |  |
| cg12571155                                                                                           | 1.59E-03               | 1.46E-03               | 8.25E-02              | 5.41E-01              | 1                           | 1                           |  |
| cg23605244                                                                                           | -1.21E-04              | -6.63E-03              | 9.30E-01              | 6.69E-02              | 1                           | 1                           |  |
| cg23739390                                                                                           | -2.71E-04              | 8.77E-04               | 4.22E-01              | 3.20E-01              | 1                           | 1                           |  |
| cg00961418                                                                                           | -2.53E-03              | -5.51E-03              | 1.91E-01              | 2.74E-01              | 1                           | 1                           |  |
| cg20479816                                                                                           | -6.67E-05              | -1.63E-03              | 8.74E-01              | 1.36E-01              | 1                           | 1                           |  |
| cg12884719                                                                                           | -9.67E-04              | -1.39E-02              | 7.36E-01              | 6.76E-02              | 1                           | 1                           |  |
| cg09369190                                                                                           | -1.26E-03              | -3.64E-03              | 1.83E-02              | 9.75E-03              | 1                           | 1                           |  |
| cg1636896                                                                                            | -3.69E-04              | -1.11E-03              | 5.59E-01              | 5.00E-01              | 1                           | 1                           |  |
| cg11237901                                                                                           | -3.01E-03              | 2.63E-03               | 5.01E-01              | 8.21E-01              | 1                           | 1                           |  |
| cg13679804                                                                                           | -7.39E-03              | 1.12E-03               | 6.43E-02              | 9.14E-01              | 1                           | 1                           |  |
| cg1304160                                                                                            | -3.73E-04              | -2.15E-03              | 4.66E-01              | 1.16E-01              | 1                           | 1                           |  |



|            |           |           |          |          |   |          |
|------------|-----------|-----------|----------|----------|---|----------|
| cg27386718 | 1.96E-04  | 7.69E-04  | 7.64E-01 | 6.53E-01 | 1 | 1        |
| cg09854726 | 1.68E-03  | -2.35E-02 | 1.25E-01 | 4.13E-01 | 1 | 1        |
| cg24225492 | -3.18E-04 | -2.23E-03 | 4.24E-01 | 3.13E-02 | 1 | 1        |
| cg16644477 | 8.57E-05  | -2.24E-03 | 8.17E-01 | 2.11E-02 | 1 | 1        |
| cg01407748 | 9.42E-05  | -1.03E-03 | 8.69E-01 | 4.92E-01 | 1 | 1        |
| cg08271400 | -3.27E-05 | -1.48E-03 | 8.74E-01 | 6.79E-03 | 1 | 1        |
| cg01245155 | -1.14E-03 | -6.84E-03 | 3.27E-01 | 2.70E-02 | 1 | 1        |
| cg25082074 | -1.98E-03 | -1.17E-02 | 3.78E-01 | 4.90E-02 | 1 | 1        |
| cg08954776 | -1.39E-04 | -1.86E-04 | 8.12E-01 | 9.03E-01 | 1 | 1        |
| cg08657492 | -4.97E-04 | 6.36E-03  | 9.28E-01 | 6.59E-01 | 1 | 1        |
| cg15892776 | 1.53E-04  | 9.48E-04  | 7.51E-01 | 4.50E-01 | 1 | 1        |
| cg22879270 | 1.64E-04  | 1.83E-04  | 2.11E-01 | 5.97E-01 | 1 | 1        |
| cg1506615  | -3.58E-03 | 8.21E-03  | 8.11E-02 | 1.23E-01 | 1 | 1        |
| cg1257671  | -4.15E-04 | 4.54E-03  | 6.99E-01 | 1.1E-01  | 1 | 1        |
| cg03639429 | -3.92E-04 | -5.36E-04 | 7.14E-01 | 8.50E-01 | 1 | 1        |
| cg23237607 | 3.09E-04  | 6.14E-04  | 9.00E-01 | 9.24E-01 | 1 | 1        |
| cg19784286 | -9.25E-04 | -5.23E-03 | 1.78E-01 | 4.30E-03 | 1 | 1        |
| cg16533029 | 1.20E-03  | -2.66E-02 | 7.40E-01 | 4.89E-03 | 1 | 1        |
| cg25687360 | -5.12E-04 | 7.36E-04  | 9.36E-02 | 3.58E-01 | 1 | 1        |
| cg2211973  | -2.27E-03 | 1.01E-02  | 3.24E-01 | 9.03E-02 | 1 | 1        |
| cg19989895 | -1.86E-03 | -1.91E-03 | 8.67E-02 | 5.03E-01 | 1 | 1        |
| cg07196761 | -8.93E-05 | -8.30E-04 | 6.83E-01 | 1.50E-01 | 1 | 1        |
| cg24363299 | 1.45E-03  | 2.67E-03  | 4.98E-01 | 6.32E-01 | 1 | 1        |
| cg12652118 | -5.35E-04 | 2.80E-03  | 6.79E-01 | 4.04E-01 | 1 | 1        |
| cg26132518 | -5.48E-04 | -1.25E-03 | 4.13E-01 | 4.75E-01 | 1 | 1        |
| cg01140247 | -2.11E-03 | -7.49E-03 | 2.06E-01 | 8.57E-02 | 1 | 1        |
| cg22264898 | 7.58E-04  | -8.16E-03 | 8.46E-01 | 4.27E-01 | 1 | 1        |
| cg01458659 | -6.17E-06 | 3.12E-03  | 9.95E-01 | 2.08E-01 | 1 | 1        |
| cg1443101  | 5.80E-04  | 1.48E-03  | 4.26E-01 | 4.38E-01 | 1 | 1        |
| cg15047408 | 2.34E-03  | 5.60E-04  | 1.07E-01 | 8.82E-01 | 1 | 1        |
| cg2617055  | -1.51E-04 | -9.64E-04 | 4.84E-01 | 8.92E-02 | 1 | 1        |
| cg21859546 | -1.79E-03 | -2.70E-02 | 7.19E-01 | 3.93E-02 | 1 | 1        |
| cg2923814  | -3.24E-03 | -1.19E-02 | 3.58E-01 | 2.34E-01 | 1 | 1        |
| cg1282565  | -2.40E-03 | -1.16E-02 | 2.46E-01 | 3.09E-02 | 1 | 1        |
| cg05336486 | 6.41E-05  | 1.69E-02  | 9.74E-01 | 1.22E-03 | 1 | 0.6463   |
| cg24278421 | -2.12E-03 | 2.74E-02  | 4.96E-01 | 9.34E-04 | 1 | 0.5447   |
| cg04891843 | -1.77E-04 | 2.51E-04  | 3.98E-01 | 6.48E-01 | 1 | 1        |
| cg25446789 | 1.79E-04  | -2.21E-02 | 9.34E-01 | 1.25E-04 | 1 | 0.1392   |
| cg05399244 | -5.69E-03 | -1.04E-02 | 1.59E-01 | 3.23E-01 | 1 | 1        |
| cg13679817 | -1.01E-03 | -1.81E-03 | 1.32E-01 | 3.04E-01 | 1 | 1        |
| cg16655805 | 1.36E-03  | -2.37E-03 | 4.26E-01 | 5.91E-01 | 1 | 1        |
| cg2549614  | -9.96E-04 | -1.28E-03 | 2.79E-02 | 2.73E-01 | 1 | 1        |
| cg21788902 | 1.17E-05  | -4.31E-04 | 9.78E-01 | 6.98E-01 | 1 | 1        |
| cg05413285 | -1.75E-03 | -4.22E-03 | 7.93E-02 | 1.06E-01 | 1 | 1        |
| cg05094137 | -6.03E-04 | -1.08E-02 | 7.17E-01 | 1.45E-02 | 1 | 1        |
| cg26153425 | -1.75E-03 | -1.67E-02 | 6.26E-01 | 7.78E-02 | 1 | 1        |
| cg27367526 | -2.52E-03 | 2.63E-02  | 2.95E-01 | 4.68E-05 | 1 | 0.0669   |
| cg1138206  | -2.45E-04 | 1.73E-03  | 7.40E-01 | 3.69E-01 | 1 | 1        |
| cg06950346 | -4.54E-03 | -4.68E-03 | 6.94E-03 | 2.83E-01 | 1 | 1        |
| cg05747251 | 1.03E-04  | -4.71E-03 | 9.29E-01 | 1.23E-01 | 1 | 1        |
| cg15449979 | -9.70E-04 | -3.75E-01 | 2.78E-02 | 1.1E-01  | 1 | 1        |
| cg12055844 | 9.74E-04  | -5.65E-04 | 1.32E-02 | 5.81E-01 | 1 | 1        |
| cg08158042 | -8.52E-04 | -2.49E-04 | 9.07E-02 | 8.49E-01 | 1 | 1        |
| cg27039257 | -4.57E-03 | -1.40E-02 | 0.08347  | 4.25E-02 | 1 | 1        |
| cg20319484 | -1.11E-03 | -3.32E-04 | 0.19954  | 8.83E-01 | 1 | 1        |
| cg14228029 | -1.64E-04 | 6.33E-04  | 0.93033  | 8.97E-01 | 1 | 1        |
| cg03185855 | -4.15E-03 | -4.70E-03 | 0.08922  | 4.63E-01 | 1 | 1        |
| cg0803614  | -1.39E-03 | -3.22E-03 | 0.02129  | 4.08E-02 | 1 | 1        |
| cg06453421 | -1.64E-03 | -1.16E-02 | 0.07204  | 2.70E-06 | 1 | 0.0072   |
| cg21248089 | -2.65E-03 | -8.86E-03 | 0.46098  | 3.46E-01 | 1 | 1        |
| cg05235903 | -6.46E-05 | -9.50E-04 | 0.65061  | 1.1E-02  | 1 | 1        |
| cg1402715  | -4.16E-04 | -6.67E-03 | 0.57928  | 8.32E-04 | 1 | 0.5045   |
| cg11566411 | -4.59E-03 | -1.48E-02 | 0.00575  | 6.97E-04 | 1 | 0.4501   |
| cg01845076 | 6.47E-03  | 4.84E-03  | 0.11340  | 6.51E-01 | 1 | 1        |
| cg05164421 | 1.46E-04  | 4.04E-03  | 0.92249  | 3.1E-01  | 1 | 1        |
| cg19235886 | -3.94E-04 | -4.19E-03 | 0.77659  | 2.55E-01 | 1 | 1        |
| cg12323883 | -3.60E-03 | -6.1E-03  | 0.23819  | 4.45E-01 | 1 | 1        |
| cg07040338 | -6.38E-04 | 7.66E-07  | 0.01217  | 9.99E-01 | 1 | 1        |
| cg17747781 | -5.63E-03 | 1.38E-02  | 0.01725  | 2.43E-02 | 1 | 1        |
| cg06289282 | -1.68E-04 | -4.86E-04 | 0.54544  | 5.07E-01 | 1 | 1        |
| cg07138414 | -1.20E-04 | 1.33E-03  | 0.80162  | 2.87E-01 | 1 | 1        |
| cg19363465 | -1.90E-03 | 8.57E-03  | 0.09943  | 5.05E-03 | 1 | 1        |
| cg02914589 | -4.12E-03 | -1.07E-02 | 0.04230  | 4.44E-02 | 1 | 1        |
| cg12022532 | -1.69E-03 | 1.03E-03  | 0.08167  | 6.81E-01 | 1 | 1        |
| cg23229584 | -9.85E-04 | -1.60E-03 | 0.00168  | 4.77E-02 | 1 | 1        |
| cg04831280 | 6.61E-04  | -3.59E-03 | 0.41927  | 8.96E-02 | 1 | 1        |
| cg06357940 | 5.83E-04  | -3.54E-03 | 0.25862  | 9.83E-03 | 1 | 1        |
| cg17660251 | -2.37E-04 | -1.30E-03 | 0.59718  | 2.69E-01 | 1 | 1        |
| cg00418087 | -6.38E-04 | -9.82E-04 | 0.01585  | 1.53E-01 | 1 | 1        |
| cg16777780 | -1.49E-03 | -1.07E-02 | 0.4261   | 3.19E-02 | 1 | 1        |
| cg21420674 | -3.07E-04 | -3.31E-02 | 0.88184  | 6.16E-09 | 1 | 4.54E-05 |
| cg27412523 | -7.00E-04 | 1.01E-03  | 0.57324  | 7.56E-01 | 1 | 1        |
| cg24652379 | -4.77E-04 | 8.31E-04  | 0.05133  | 1.96E-01 | 1 | 1        |
| cg07456387 | -4.18E-03 | -2.97E-03 | 0.00188  | 3.90E-01 | 1 | 1        |
| cg24147838 | 1.87E-04  | 2.22E-03  | 0.92675  | 1.76E-01 | 1 | 1        |
| cg15506702 | 1.32E-03  | -2.65E-03 | 0.05195  | 1.40E-01 | 1 | 1        |
| cg04987950 | 7.66E-05  | -4.40E-04 | 0.79172  | 5.59E-01 | 1 | 1        |
| cg21189242 | 3.34E-04  | -4.58E-05 | 0.27375  | 9.54E-01 | 1 | 1        |
| cg20715159 | -1.89E-03 | -3.76E-03 | 0.27827  | 4.12E-01 | 1 | 1        |
| cg12736692 | 2.48E-04  | -9.57E-04 | 0.74848  | 6.36E-01 | 1 | 1        |
| cg23264059 | -6.22E-05 | -1.12E-03 | 0.72928  | 1.81E-02 | 1 | 1        |
| cg14272204 | -2.02E-04 | 2.27E-04  | 0.79427  | 9.11E-01 | 1 | 1        |
| cg21900799 | -3.18E-03 | -6.80E-03 | 0.38680  | 4.83E-01 | 1 | 1        |
| cg19830372 | -1.60E-04 | 5.91E-04  | 0.76664  | 6.76E-01 | 1 | 1        |
| cg08915171 | 1.52E-03  | 2.04E-03  | 0.26547  | 5.67E-01 | 1 | 1        |
| cg08121652 | 1.70E-03  | 2.52E-03  | 0.32313  | 5.78E-01 | 1 | 1        |
| cg12757684 | -1.09E-03 | -5.54E-03 | 0.44207  | 1.41E-01 | 1 | 1        |
| cg03686959 | 9.00E-04  | -3.16E-03 | 0.33113  | 1.96E-01 | 1 | 1        |
| cg26474270 | -2.20E-04 | -3.78E-03 | 0.78411  | 7.26E-02 | 1 | 1        |
| cg16735986 | -3.90E-04 | 2.38E-04  | 0.27446  | 8.00E-01 | 1 | 1        |
| cg16583193 | -4.64E-05 | -1.88E-04 | 0.93058  | 1.84E-01 | 1 | 1        |
| cg08415582 | 1.19E-03  | 5.08E-02  | 0.71862  | 2.04E-08 | 1 | 0.0001   |
| cg23531383 | 1.63E-03  | -1.40E-02 | 0.40861  | 7.04E-03 | 1 | 1        |
| cg26300597 | -3.34E-03 | 6.11E-03  | 0.03840  | 1.47E-01 | 1 | 1        |
| cg07723258 | 1.14E-03  | -1.41E-02 | 0.40529  | 1.21E-04 | 1 | 0.1342   |
| cg04343459 | -2.52E-04 | -7.09E-04 | 0.46520  | 4.35E-01 | 1 | 1        |
| cg09435668 | 3.04E-03  | -3.62E-03 | 0.35465  | 6.72E-01 | 1 | 1        |
| cg21964391 | -1.44E-03 | 1.81E-03  | 0.03707  | 3.16E-01 | 1 | 1        |
| cg26509139 | 2.26E-04  | 1.96E-04  | 0.39349  | 7.76E-01 | 1 | 1        |
| cg06602723 | 9.69E-04  | 2.29E-02  | 0.77395  | 9.87E-03 | 1 | 1        |
| cg2414567  | 8.17E-04  | -5.46E-04 | 0.34787  | 8.11E-01 | 1 | 1        |
| cg16622906 | 6.54E-03  | -1.20E-02 | 0.04322  | 1.55E-01 | 1 | 1        |
| cg18441811 | 8.14E-05  | 4.84E-04  | 0.77455  | 5.13E-01 | 1 | 1        |
| cg01708711 | -7.98E-04 | -1.04E-03 | 0.35948  | 6.50E-01 | 1 | 1        |
| cg05492660 | -9.38E-05 | 1.59E-03  | 0.95199  | 6.94E-01 | 1 | 1        |
| cg00611227 | -1.39E-03 | 6.30E-04  | 0.05134  | 7.35E-01 | 1 | 1        |

|            |           |           |          |          |   |        |
|------------|-----------|-----------|----------|----------|---|--------|
| cg03816707 | 4.66E-03  | 2.36E-02  | 0.01219  | 2.81E-06 | 1 | 0.0074 |
| cg14297062 | 5.25E-05  | 1.19E-05  | 0.82087  | 9.84E-01 | 1 | 1      |
| cg02783833 | 2.67E-04  | -3.82E-04 | 0.62333  | 7.88E-01 | 1 | 1      |
| cg18503679 | 5.70E-04  | -4.37E-03 | 0.21801  | 3.27E-04 | 1 | 0.2697 |
| cg06265811 | -2.21E-04 | -1.11E-03 | 0.60616  | 3.25E-01 | 1 | 1      |
| cg04872848 | -4.69E-03 | 1.89E-02  | 0.08144  | 7.59E-03 | 1 | 1      |
| cg05523449 | 1.15E-03  | -5.69E-04 | 0.05860  | 7.18E-01 | 1 | 1      |
| cg19165274 | -6.31E-05 | 1.65E-02  | 0.98604  | 8.09E-02 | 1 | 1      |
| cg13060970 | 9.60E-04  | -1.15E-02 | 0.48172  | 1.75E-03 | 1 | 0.8027 |
| cg13689560 | 4.43E-04  | 3.03E-03  | 0.72380  | 3.58E-01 | 1 | 1      |
| cg14360448 | 8.74E-04  | -9.31E-03 | 0.55471  | 1.77E-02 | 1 | 1      |
| cg07016556 | -2.51E-03 | 2.16E-03  | 0.33049  | 7.51E-01 | 1 | 1      |
| cg1115358  | 2.26E-03  | 5.26E-03  | 0.16700  | 2.22E-01 | 1 | 1      |
| cg24040966 | 3.08E-05  | -4.48E-04 | 0.90222  | 4.96E-01 | 1 | 1      |
| cg03707256 | 3.73E-04  | 1.47E-03  | 0.65738  | 5.06E-01 | 1 | 1      |
| cg26272214 | -3.42E-03 | 1.49E-02  | 0.08631  | 3.99E-03 | 1 | 1      |
| cg0068332  | 3.75E-03  | -5.77E-03 | 0.02165  | 1.77E-01 | 1 | 1      |
| cg25367568 | -1.66E-03 | -3.94E-03 | 0.28435  | 3.30E-01 | 1 | 1      |
| cg14341131 | -2.07E-03 | -3.55E-03 | 0.35344  | 5.40E-01 | 1 | 1      |
| cg19299265 | -4.59E-03 | 2.06E-02  | 0.01894  | 7.95E-05 | 1 | 0.0992 |
| cg16883132 | -1.31E-03 | -1.29E-03 | 0.08883  | 5.23E-01 | 1 | 1      |
| cg24065451 | -6.66E-03 | 1.12E-02  | 0.04859  | 2.06E-01 | 1 | 1      |
| cg12732334 | -2.12E-03 | -7.20E-03 | 0.60567  | 5.00E-01 | 1 | 1      |
| cg09427273 | -9.95E-04 | -5.59E-03 | 0.1920   | 5.84E-04 | 1 | 0.3989 |
| cg20641660 | 3.60E-04  | -1.75E-03 | 0.06684  | 8.79E-04 | 1 | 0.5202 |
| cg27254338 | -2.89E-03 | -5.01E-03 | 0.06529  | 2.22E-01 | 1 | 1      |
| cg19423170 | 5.57E-04  | -1.17E-02 | 0.84997  | 1.33E-01 | 1 | 1      |
| cg1666199  | 1.12E-03  | 8.91E-03  | 0.64473  | 1.66E-01 | 1 | 1      |
| cg06715661 | -4.63E-04 | -5.55E-05 | 0.47154  | 9.74E-01 | 1 | 1      |
| cg02648015 | -7.45E-04 | -2.93E-03 | 0.25682  | 9.09E-02 | 1 | 1      |
| cg16724216 | -3.77E-04 | -5.83E-03 | 0.73389  | 4.58E-02 | 1 | 1      |
| cg11120516 | 3.51E-05  | 8.39E-05  | 0.78471  | 8.01E-01 | 1 | 1      |
| cg00176020 | -1.16E-03 | -1.14E-02 | 0.41980  | 3.01E-03 | 1 | 1      |
| cg05423392 | 2.23E-03  | -1.33E-03 | 0.48956  | 8.77E-01 | 1 | 1      |
| cg19605773 | -1.95E-04 | 2.13E-04  | 1.74E-01 | 5.70E-01 | 1 | 1      |
| cg16049584 | -9.60E-05 | -6.46E-04 | 5.64E-01 | 1.41E-01 | 1 | 1      |
| cg07908697 | -1.06E-04 | 9.73E-04  | 8.17E-01 | 4.22E-01 | 1 | 1      |
| cg05853306 | -4.07E-04 | 1.12E-04  | 4.34E-01 | 9.35E-01 | 1 | 1      |
| cg05041307 | 7.33E-04  | 3.06E-03  | 4.72E-01 | 2.48E-01 | 1 | 1      |
| cg09387528 | 1.84E-04  | -6.29E-04 | 8.72E-01 | 8.33E-01 | 1 | 1      |
| cg02353154 | -3.43E-03 | 1.91E-02  | 3.02E-01 | 2.86E-02 | 1 | 1      |
| cg02715572 | -1.52E-03 | 7.64E-03  | 4.46E-01 | 1.44E-01 | 1 | 1      |
| cg24201251 | 1.26E-03  | -3.75E-03 | 1.86E-01 | 1.35E-01 | 1 | 1      |
| cg14736911 | -4.72E-03 | -9.84E-03 | 3.26E-02 | 8.58E-02 | 1 | 1      |
| cg23979520 | -9.28E-05 | 2.80E-04  | 8.44E-01 | 8.22E-01 | 1 | 1      |
| cg02129962 | 3.38E-04  | -1.87E-03 | 5.22E-01 | 1.77E-01 | 1 | 1      |
| cg1668185  | -1.48E-04 | 2.88E-04  | 4.36E-01 | 5.60E-01 | 1 | 1      |
| cg15676371 | -3.68E-04 | -2.38E-04 | 6.40E-02 | 6.47E-01 | 1 | 1      |
| cg14403090 | -1.91E-05 | -3.90E-04 | 8.71E-01 | 2.04E-01 | 1 | 1      |
| cg15282031 | 4.93E-04  | -2.67E-02 | 9.08E-01 | 1.88E-02 | 1 | 1      |
| cg08621168 | -2.14E-04 | 2.88E-04  | 3.37E-01 | 6.21E-01 | 1 | 1      |
| cg16220593 | -2.09E-03 | -1.57E-02 | 2.1E-01  | 6.29E-04 | 1 | 0.4190 |
| cg17566238 | 4.85E-05  | 2.05E-04  | 8.89E-01 | 8.23E-01 | 1 | 1      |
| cg06462044 | -1.41E-03 | -6.02E-03 | 2.56E-01 | 6.39E-02 | 1 | 1      |
| cg24504349 | -2.60E-03 | -1.38E-02 | 4.92E-01 | 1.66E-01 | 1 | 1      |
| cg14723638 | -8.68E-05 | -1.19E-03 | 7.09E-01 | 5.30E-02 | 1 | 1      |
| cg16097041 | 1.40E-03  | -3.78E-03 | 2.66E-01 | 2.52E-01 | 1 | 1      |
| cg2268141  | -4.43E-03 | 1.18E-03  | 6.82E-02 | 8.53E-01 | 1 | 1      |
| cg01723892 | -4.58E-03 | -9.65E-03 | 8.16E-02 | 1.60E-01 | 1 | 1      |
| cg01766844 | 8.98E-05  | -1.78E-03 | 6.55E-01 | 1.02E-03 | 1 | 0.5729 |
| cg14216173 | 1.45E-04  | -7.72E-04 | 5.90E-01 | 2.74E-01 | 1 | 1      |
| cg08161480 | 2.44E-03  | -8.51E-03 | 2.50E-01 | 1.29E-01 | 1 | 1      |
| cg27425709 | -1.30E-04 | -1.25E-03 | 6.97E-01 | 1.50E-01 | 1 | 1      |
| cg09277575 | -7.95E-04 | 3.02E-03  | 4.52E-01 | 2.76E-01 | 1 | 1      |
| cg18816605 | 1.78E-04  | -3.51E-04 | 7.03E-01 | 7.73E-01 | 1 | 1      |
| cg24892433 | 1.1E-03   | 8.93E-03  | 4.31E-01 | 1.50E-02 | 1 | 1      |
| cg02075976 | 2.00E-04  | -4.93E-03 | 8.97E-01 | 2.77E-01 | 1 | 1      |
| cg02242004 | -1.41E-03 | 2.89E-02  | 6.59E-01 | 6.52E-04 | 1 | 0.4291 |
| cg27491277 | 2.23E-04  | 4.40E-04  | 5.84E-01 | 6.81E-01 | 1 | 1      |
| cg2593801  | -1.06E-03 | -1.25E-03 | 2.42E-03 | 1.68E-01 | 1 | 1      |
| cg08222069 | -1.62E-04 | -6.05E-04 | 7.97E-01 | 7.13E-01 | 1 | 1      |
| cg22555440 | -4.80E-04 | -3.76E-04 | 4.19E-01 | 8.08E-01 | 1 | 1      |
| cg09317403 | 1.47E-04  | -1.51E-03 | 4.69E-01 | 4.85E-03 | 1 | 1      |
| cg15309953 | -2.86E-04 | -1.54E-02 | 9.42E-01 | 1.36E-01 | 1 | 1      |
| cg16908944 | -7.12E-04 | -2.01E-03 | 5.24E-02 | 3.68E-02 | 1 | 1      |
| cg03983890 | 2.1E-05   | -1.67E-04 | 9.60E-01 | 8.82E-01 | 1 | 1      |
| cg05269359 | 2.24E-04  | -3.33E-03 | 5.39E-01 | 6.75E-04 | 1 | 0.4383 |
| cg13907034 | -1.67E-03 | -3.45E-03 | 1.62E-03 | 1.20E-02 | 1 | 1      |
| cg1402161  | 2.94E-04  | -1.25E-03 | 2.70E-01 | 7.51E-02 | 1 | 1      |
| cg15497249 | -4.20E-05 | 1.79E-04  | 8.41E-01 | 7.46E-01 | 1 | 1      |
| cg13257654 | 1.83E-03  | -8.55E-03 | 4.11E-01 | 1.41E-01 | 1 | 1      |
| cg27120437 | -3.34E-03 | -1.34E-02 | 1.67E-01 | 3.49E-02 | 1 | 1      |
| cg16204509 | -3.19E-04 | 7.15E-03  | 8.96E-01 | 2.63E-01 | 1 | 1      |
| cg24968692 | 3.47E-04  | -1.13E-03 | 6.98E-02 | 2.33E-02 | 1 | 1      |
| cg07589563 | -2.89E-06 | 1.29E-06  | 9.88E-01 | 9.98E-01 | 1 | 1      |
| cg19742870 | 9.67E-04  | -1.26E-02 | 4.77E-01 | 4.16E-04 | 1 | 0.3185 |
| cg24071676 | -8.61E-04 | -2.39E-04 | 9.89E-03 | 7.81E-01 | 1 | 1      |
| cg07562888 | -2.33E-04 | -1.44E-03 | 6.62E-01 | 2.98E-01 | 1 | 1      |
| cg09758167 | 6.22E-04  | -4.70E-04 | 1.06E-01 | 6.39E-01 | 1 | 1      |
| cg20785459 | -5.24E-04 | -9.27E-04 | 2.24E-01 | 4.11E-01 | 1 | 1      |
| cg09427745 | -2.28E-03 | 1.27E-03  | 1.21E-02 | 5.93E-01 | 1 | 1      |
| cg23803838 | -6.51E-04 | 7.70E-05  | 1.12E-01 | 9.42E-01 | 1 | 1      |
| cg12787530 | -3.94E-04 | -1.08E-03 | 4.13E-01 | 3.94E-01 | 1 | 1      |
| cg05761971 | -4.15E-04 | 1.47E-04  | 4.90E-01 | 9.26E-01 | 1 | 1      |
| cg25800356 | 4.12E-05  | -1.81E-03 | 8.48E-01 | 1.54E-03 | 1 | 0.741  |
| cg24309215 | -1.23E-04 | -1.55E-02 | 9.78E-01 | 1.84E-01 | 1 | 1      |
| cg05040501 | 2.27E-04  | 5.25E-04  | 5.39E-01 | 5.91E-01 | 1 | 1      |
| cg24823222 | -1.29E-04 | -9.76E-04 | 4.83E-01 | 4.15E-02 | 1 | 1      |
| cg06292709 | -1.22E-03 | -1.84E-03 | 9.57E-02 | 3.38E-01 | 1 | 1      |
| cg09436502 | -7.85E-04 | -2.24E-03 | 3.40E-01 | 3.00E-01 | 1 | 1      |
| cg11789528 | -7.15E-04 | -1.39E-03 | 5.79E-02 | 1.72E-01 | 1 | 1      |
| cg08934660 | -2.51E-05 | 8.16E-04  | 9.63E-01 | 5.65E-01 | 1 | 1      |
| cg16602747 | -1.00E-03 | -5.99E-03 | 4.77E-01 | 1.03E-01 | 1 | 1      |
| cg0734518  | -2.25E-03 | -1.20E-02 | 2.15E-01 | 1.23E-02 | 1 | 1      |
| cg07568032 | -5.12E-03 | -6.01E-03 | 1.02E-01 | 4.61E-01 | 1 | 1      |
| cg11647944 | -7.26E-05 | -1.15E-03 | 7.71E-01 | 7.79E-02 | 1 | 1      |
| cg19388739 | -1.60E-03 | 9.76E-04  | 4.95E-01 | 8.74E-01 | 1 | 1      |
| cg17811589 | -5.16E-03 | 8.17E-03  | 3.22E-02 | 1.93E-01 | 1 | 1      |
| cg09060081 | -2.98E-04 | -1.60E-04 | 5.07E-01 | 8.92E-01 | 1 | 1      |
| cg06540283 | -3.31E-04 | -2.65E-04 | 2.20E-01 | 7.1E-01  | 1 | 1      |
| cg01245191 | -1.03E-04 | 2.61E-04  | 8.73E-01 | 8.77E-01 | 1 | 1      |
| cg14302428 | 7.42E-04  | -6.77E-03 | 4.65E-01 | 1.23E-02 | 1 | 1      |
| cg07944721 | -1.59E-03 | -2.71E-03 | 1.16E-01 | 3.08E-01 | 1 | 1      |
| cg08264638 | -3.42E-04 | -2.57E-03 | 4.32E-01 | 2.44E-02 | 1 | 1      |
| cg19004775 | -2.53E-03 | 2.99E-03  | 5.11E-01 | 7.69E-01 | 1 | 1      |
| cg16555188 | -1.82E-03 | -5.19E-03 | 8.67E-02 | 6.20E-02 | 1 | 1      |

|            |           |           |          |          |       |        |
|------------|-----------|-----------|----------|----------|-------|--------|
| cg02218268 | 4.35E-04  | -1.02E-03 | 3.37E-01 | 3.86E-01 | 1     | 1      |
| cg20567785 | 8.79E-04  | -1.01E-02 | 8.08E-01 | 9.14E-01 | 1     | 1      |
| cg15012214 | 1.25E-04  | 2.86E-03  | 8.52E-01 | 1.03E-01 | 1     | 1      |
| cg1321655  | -1.89E-03 | 2.69E-02  | 4.88E-01 | 2.21E-04 | 1     | 0.2049 |
| cg21961249 | 1.48E-03  | -1.12E-03 | 2.24E-01 | 7.26E-01 | 1     | 1      |
| cg13848802 | 5.65E-04  | -1.18E-04 | 7.06E-02 | 8.83E-01 | 1     | 1      |
| cg14873515 | -1.32E-03 | -6.71E-03 | 5.67E-01 | 2.75E-01 | 1     | 1      |
| cg1301169  | -3.90E-04 | -2.27E-03 | 2.02E-01 | 4.53E-03 | 1     | 1      |
| cg25882643 | 7.52E-03  | -1.62E-03 | 7.99E-03 | 8.25E-01 | 1     | 1      |
| cg12487466 | -2.93E-04 | 2.90E-03  | 7.74E-01 | 2.78E-01 | 1     | 1      |
| cg26708920 | 1.70E-03  | -9.44E-02 | 9.24E-01 | 4.46E-02 | 1     | 1      |
| cg20095985 | 1.32E-04  | -6.1E-04  | 4.04E-01 | 1.42E-01 | 1     | 1      |
| cg16086237 | -3.36E-03 | 7.46E-03  | 5.71E-02 | 1.07E-01 | 1     | 1      |
| cg03605666 | 3.51E-04  | -6.67E-06 | 4.86E-01 | 9.96E-01 | 1     | 1      |
| cg0442511  | 2.29E-03  | -5.63E-03 | 1.93E-01 | 2.16E-01 | 1     | 1      |
| cg11637578 | -3.22E-04 | -1.50E-05 | 2.75E-01 | 9.84E-01 | 1     | 1      |
| cg27284034 | 2.87E-04  | -2.51E-03 | 8.14E-01 | 4.37E-01 | 1     | 1      |
| cg19985870 | -1.20E-03 | -1.29E-03 | 5.93E-01 | 8.28E-01 | 1     | 1      |
| cg21813747 | -1.04E-03 | -3.40E-04 | 5.13E-01 | 9.35E-01 | 1     | 1      |
| cg16842017 | 3.02E-04  | -2.95E-04 | 3.94E-01 | 7.49E-01 | 1     | 1      |
| cg1971916  | -2.15E-04 | -1.59E-03 | 6.16E-01 | 1.57E-01 | 1     | 1      |
| cg03764753 | -2.83E-03 | -2.44E-03 | 5.80E-04 | 2.54E-01 | 1     | 1      |
| cg19916413 | 9.14E-04  | -8.90E-04 | 3.40E-01 | 7.22E-01 | 1     | 1      |
| cg09628931 | -1.14E-05 | -9.43E-04 | 9.66E-01 | 1.81E-01 | 1     | 1      |
| cg24332002 | -9.06E-03 | -4.30E-03 | 5.78E-06 | 3.96E-01 | 0.122 | 1      |
| cg16051296 | 2.51E-04  | 2.71E-04  | 4.77E-01 | 7.71E-01 | 1     | 1      |
| cg07406237 | 2.53E-04  | 1.24E-03  | 4.69E-01 | 1.77E-01 | 1     | 1      |
| cg21462596 | -1.31E-03 | -4.12E-02 | 8.04E-01 | 3.29E-03 | 1     | 1      |
| cg26112901 | -2.11E-04 | 1.84E-05  | 9.81E-02 | 9.56E-01 | 1     | 1      |
| cg14687127 | -3.11E-04 | -1.05E-03 | 2.17E-01 | 1.14E-01 | 1     | 1      |
| cg25349643 | -2.24E-04 | -1.54E-03 | 4.50E-01 | 4.78E-02 | 1     | 1      |
| cg23325278 | -4.04E-03 | -1.83E-03 | 6.36E-03 | 6.34E-01 | 1     | 1      |
| cg19405177 | -5.73E-03 | -9.1E-03  | 2.63E-01 | 4.98E-01 | 1     | 1      |
| cg05926198 | -1.15E-03 | -7.28E-03 | 3.71E-01 | 3.34E-02 | 1     | 1      |
| cg02568008 | -1.25E-04 | -5.09E-04 | 6.07E-01 | 5.04E-01 | 1     | 1      |
| cg18895813 | -6.42E-04 | -1.31E-04 | 2.44E-01 | 9.28E-01 | 1     | 1      |
| cg21165673 | -2.74E-04 | -7.03E-03 | 8.90E-01 | 1.77E-01 | 1     | 1      |
| cg22565399 | -1.01E-04 | -8.35E-04 | 5.87E-01 | 8.69E-02 | 1     | 1      |
| cg04302492 | -5.67E-06 | -3.59E-04 | 9.90E-01 | 7.67E-01 | 1     | 1      |
| cg27260684 | -3.72E-06 | -6.80E-03 | 9.99E-01 | 2.28E-01 | 1     | 1      |
| cg0946961  | -2.98E-04 | -3.94E-04 | 8.65E-01 | 9.31E-01 | 1     | 1      |
| cg27525032 | 2.06E-04  | 9.64E-03  | 8.80E-01 | 7.50E-03 | 1     | 1      |
| cg22138408 | -5.92E-04 | -1.13E-02 | 7.84E-01 | 4.59E-02 | 1     | 1      |
| cg00260235 | 3.00E-04  | -3.43E-04 | 3.94E-01 | 7.1E-01  | 1     | 1      |
| cg17866376 | 3.22E-04  | -1.70E-03 | 3.55E-01 | 6.43E-02 | 1     | 1      |
| cg03562501 | 9.34E-05  | -1.98E-03 | 7.38E-01 | 7.75E-03 | 1     | 1      |
| cg25362339 | 1.45E-05  | -4.15E-03 | 9.96E-01 | 5.69E-01 | 1     | 1      |
| cg24773560 | 3.26E-03  | 1.03E-02  | 1.34E-01 | 6.90E-02 | 1     | 1      |
| cg22465293 | -1.1E-03  | -1.82E-03 | 1.68E-01 | 3.82E-01 | 1     | 1      |
| cg15281496 | 3.30E-04  | -1.68E-03 | 4.19E-01 | 1.16E-01 | 1     | 1      |
| cg24612171 | -3.59E-03 | -1.09E-02 | 2.1E-01  | 1.50E-01 | 1     | 1      |
| cg03676180 | 9.78E-04  | -1.85E-03 | 1.13E-01 | 2.64E-01 | 1     | 1      |
| cg17171933 | -2.85E-04 | -1.83E-03 | 4.93E-01 | 9.48E-02 | 1     | 1      |
| cg02125281 | 2.39E-04  | -1.99E-04 | 4.60E-01 | 8.15E-01 | 1     | 1      |
| cg22068687 | 4.73E-05  | 1.38E-03  | 9.47E-01 | 4.65E-01 | 1     | 1      |
| cg16573044 | -6.74E-04 | 7.46E-04  | 3.03E-02 | 3.56E-01 | 1     | 1      |
| cg22530061 | -1.61E-04 | -6.71E-04 | 7.84E-01 | 6.65E-01 | 1     | 1      |
| cg18265311 | 9.45E-05  | 2.57E-04  | 6.59E-01 | 6.45E-01 | 1     | 1      |
| cg18720125 | 2.40E-03  | -2.41E-02 | 5.23E-01 | 1.49E-02 | 1     | 1      |
| cg24057041 | 3.37E-04  | 7.68E-04  | 2.74E-01 | 3.40E-01 | 1     | 1      |
| cg23021153 | -8.90E-04 | 4.96E-05  | 5.28E-02 | 9.67E-01 | 1     | 1      |
| cg25492421 | -3.04E-04 | -9.48E-04 | 2.06E-01 | 1.34E-01 | 1     | 1      |
| cg02483641 | -7.36E-04 | 2.90E-03  | 5.95E-01 | 4.27E-01 | 1     | 1      |
| cg12807668 | -6.34E-04 | -6.90E-04 | 5.45E-01 | 8.02E-01 | 1     | 1      |
| cg0665221  | -8.89E-05 | -1.55E-03 | 9.58E-01 | 7.28E-01 | 1     | 1      |
| cg27231292 | 8.57E-04  | -9.04E-04 | 4.05E-02 | 4.05E-01 | 1     | 1      |
| cg18581346 | 5.63E-04  | 2.43E-03  | 6.52E-01 | 4.58E-01 | 1     | 1      |
| cg1343545  | -3.70E-04 | -2.64E-03 | 3.27E-01 | 8.50E-03 | 1     | 1      |
| cg16747922 | -1.60E-04 | -5.31E-03 | 9.43E-01 | 3.65E-01 | 1     | 1      |
| cg06259244 | -5.96E-04 | -1.53E-03 | 3.33E-01 | 3.48E-01 | 1     | 1      |
| cg00718883 | -3.25E-04 | 1.88E-04  | 1.69E-01 | 7.63E-01 | 1     | 1      |
| cg11751808 | 1.1E-04   | -8.77E-04 | 7.48E-01 | 3.30E-01 | 1     | 1      |
| cg21170324 | -1.79E-03 | -6.22E-03 | 2.1E-01  | 1.02E-01 | 1     | 1      |
| cg20613160 | -5.95E-04 | -6.54E-04 | 2.23E-01 | 6.09E-01 | 1     | 1      |
| cg17858316 | -6.62E-05 | 4.77E-04  | 8.08E-01 | 5.04E-01 | 1     | 1      |
| cg12770519 | 3.74E-04  | -6.44E-04 | 7.32E-01 | 8.22E-01 | 1     | 1      |
| cg06655190 | -2.02E-03 | 2.44E-02  | 3.23E-01 | 1.02E-05 | 1     | 0.0203 |
| cg09222674 | -5.07E-05 | -3.1E-04  | 7.06E-01 | 3.76E-01 | 1     | 1      |
| cg20965602 | -1.28E-04 | 1.91E-03  | 8.96E-01 | 4.66E-01 | 1     | 1      |
| cg01791229 | -2.02E-03 | -3.24E-03 | 4.15E-01 | 6.21E-01 | 1     | 1      |
| cg24128943 | 4.96E-04  | -1.81E-03 | 4.78E-01 | 3.30E-01 | 1     | 1      |
| cg05008621 | -1.02E-03 | -1.45E-02 | 6.28E-01 | 9.81E-03 | 1     | 1      |
| cg25351263 | -2.52E-04 | 5.48E-04  | 4.79E-01 | 5.55E-01 | 1     | 1      |
| cg08064292 | 4.58E-03  | 1.56E-02  | 4.37E-01 | 3.14E-01 | 1     | 1      |
| cg09697644 | 5.73E-03  | -3.22E-03 | 5.32E-03 | 5.43E-01 | 1     | 1      |
| cg20242897 | -1.47E-04 | 9.09E-04  | 6.78E-01 | 3.27E-01 | 1     | 1      |
| cg17669802 | -6.54E-04 | -2.93E-03 | 1.78E-01 | 2.15E-02 | 1     | 1      |
| cg21227    | -2.63E-04 | 4.44E-03  | 6.78E-01 | 8.78E-03 | 1     | 1      |
| cg19522467 | 2.15E-04  | -6.29E-04 | 7.30E-02 | 4.72E-02 | 1     | 1      |
| cg17175364 | 7.78E-04  | -7.89E-04 | 2.08E-01 | 6.27E-01 | 1     | 1      |
| cg20798124 | -4.09E-04 | -9.12E-04 | 6.86E-01 | 7.32E-01 | 1     | 1      |
| cg00415993 | -3.37E-03 | -3.67E-03 | 2.14E-01 | 6.07E-01 | 1     | 1      |
| cg09243533 | 4.52E-04  | 4.67E-04  | 7.37E-02 | 4.76E-01 | 1     | 1      |
| cg0101263  | 3.25E-04  | -8.00E-04 | 3.41E-01 | 3.71E-01 | 1     | 1      |
| cg05474605 | -5.00E-04 | 3.77E-03  | 8.16E-01 | 5.07E-01 | 1     | 1      |
| cg24722969 | -3.89E-04 | -5.19E-04 | 4.52E-01 | 7.01E-01 | 1     | 1      |
| cg06913166 | -5.90E-04 | -1.76E-03 | 1.25E-01 | 8.21E-02 | 1     | 1      |
| cg2181175  | -4.78E-04 | -3.24E-03 | 3.83E-01 | 2.44E-02 | 1     | 1      |
| cg11116798 | -4.94E-03 | 1.07E-02  | 7.20E-03 | 2.65E-02 | 1     | 1      |
| cg22647970 | 1.39E-03  | -1.07E-03 | 2.31E-01 | 7.19E-01 | 1     | 1      |
| cg07080775 | 1.79E-03  | -1.45E-02 | 2.16E-02 | 1.80E-04 | 1     | 0.1770 |
| cg25970491 | -2.45E-03 | 1.90E-02  | 4.70E-01 | 3.48E-02 | 1     | 1      |
| cg13551783 | -1.48E-03 | -1.34E-03 | 4.63E-01 | 7.97E-01 | 1     | 1      |
| cg19411557 | 1.70E-04  | -3.13E-03 | 8.32E-01 | 1.34E-01 | 1     | 1      |
| cg11797226 | 3.88E-04  | 1.26E-04  | 3.40E-01 | 9.06E-01 | 1     | 1      |
| cg0091355  | 1.87E-04  | -3.71E-04 | 5.26E-01 | 6.33E-01 | 1     | 1      |
| cg09863138 | 3.08E-05  | 8.17E-05  | 8.61E-01 | 8.59E-01 | 1     | 1      |
| cg13412040 | -3.79E-04 | -9.39E-03 | 8.79E-01 | 1.52E-01 | 1     | 1      |
| cg19070159 | -2.47E-03 | 1.96E-03  | 7.21E-02 | 5.84E-01 | 1     | 1      |
| cg14837165 | -1.26E-04 | -2.89E-04 | 6.07E-01 | 6.51E-01 | 1     | 1      |
| cg21666867 | 3.07E-04  | -1.95E-03 | 4.40E-01 | 6.16E-02 | 1     | 1      |
| cg27508002 | -9.25E-04 | 4.35E-04  | 2.31E-02 | 6.83E-01 | 1     | 1      |
| cg0140654  | 5.76E-04  | 7.65E-03  | 7.36E-01 | 8.80E-02 | 1     | 1      |
| cg17378533 | 1.54E-04  | 1.46E-04  | 7.36E-01 | 9.02E-01 | 1     | 1      |
| cg19688605 | -6.97E-04 | -4.94E-04 | 3.98E-01 | 8.19E-01 | 1     | 1      |
| cg09266287 | 1.32E-03  | -3.06E-03 | 3.16E-02 | 6.03E-02 | 1     | 1      |

|            |           |           |          |          |   |        |
|------------|-----------|-----------|----------|----------|---|--------|
| cg00377865 | 2.58E-05  | -1.85E-03 | 9.62E-01 | 1.95E-01 | 1 | 1      |
| cg20926120 | 2.28E-04  | -8.85E-04 | 2.56E-01 | 8.94E-02 | 1 | 1      |
| cg06331862 | 2.41E-04  | 1.79E-03  | 7.44E-01 | 3.53E-01 | 1 | 1      |
| cg17289863 | 2.55E-04  | -8.92E-04 | 4.22E-01 | 2.76E-01 | 1 | 1      |
| cg05442602 | 2.77E-04  | -1.60E-02 | 9.00E-01 | 6.12E-03 | 1 | 1      |
| cg14820577 | -8.76E-05 | -6.38E-03 | 9.19E-01 | 5.61E-03 | 1 | 1      |
| cg09870200 | -1.41E-03 | 8.53E-03  | 6.32E-01 | 2.70E-01 | 1 | 1      |
| cg13321152 | -1.18E-03 | 5.82E-03  | 5.40E-01 | 2.46E-01 | 1 | 1      |
| cg15713801 | -9.74E-05 | -6.69E-04 | 5.82E-01 | 1.54E-01 | 1 | 1      |
| cg03185009 | 1.13E-03  | -8.53E-04 | 4.86E-02 | 5.69E-01 | 1 | 1      |
| cg18592561 | -7.40E-06 | 3.28E-03  | 9.95E-01 | 2.62E-01 | 1 | 1      |
| cg23674806 | 2.16E-03  | -1.09E-02 | 5.78E-01 | 2.84E-01 | 1 | 1      |
| cg16711866 | -4.42E-05 | -2.34E-04 | 7.11E-01 | 4.54E-01 | 1 | 1      |
| cg23562160 | -5.74E-04 | 1.46E-03  | 7.00E-01 | 7.08E-01 | 1 | 1      |
| cg0164831  | -1.69E-03 | -8.84E-03 | 3.69E-01 | 7.62E-02 | 1 | 1      |
| cg02576975 | -1.50E-03 | -8.03E-03 | 1.88E-01 | 7.58E-03 | 1 | 1      |
| cg06086465 | -8.44E-04 | 7.25E-05  | 8.57E-02 | 9.55E-01 | 1 | 1      |
| cg07455279 | -8.88E-04 | 1.58E-02  | 8.31E-01 | 1.51E-01 | 1 | 1      |
| cg21792018 | -6.68E-05 | -2.39E-03 | 8.16E-01 | 1.65E-03 | 1 | 0.7714 |
| cg18200800 | 1.02E-03  | -3.83E-03 | 3.46E-01 | 1.81E-01 | 1 | 1      |
| cg15162330 | -1.04E-04 | 3.92E-04  | 7.78E-01 | 6.87E-01 | 1 | 1      |
| cg11613450 | -3.63E-04 | 2.72E-02  | 8.49E-01 | 1.66E-07 | 1 | 0.0007 |
| cg23632178 | 1.27E-03  | 2.58E-05  | 6.93E-02 | 9.89E-01 | 1 | 1      |
| cg05232496 | -1.68E-03 | -5.14E-04 | 1.48E-02 | 7.72E-01 | 1 | 1      |
| cg03080607 | 1.22E-02  | 3.66E-02  | 3.35E-01 | 2.70E-01 | 1 | 1      |
| cg07739369 | -2.50E-03 | -2.85E-03 | 3.08E-01 | 6.57E-01 | 1 | 1      |
| cg11722711 | -8.56E-05 | -5.38E-05 | 8.13E-01 | 9.55E-01 | 1 | 1      |
| cg06870764 | -2.37E-04 | -2.84E-03 | 3.18E-01 | 1.06E-05 | 1 | 0.021  |
| cg1653596  | -8.20E-04 | 2.08E-03  | 2.83E-01 | 2.93E-01 | 1 | 1      |
| cg1341940  | -2.03E-04 | 5.17E-04  | 4.67E-01 | 4.81E-01 | 1 | 1      |
| cg18949521 | -6.14E-04 | 9.66E-04  | 1.22E-01 | 3.55E-01 | 1 | 1      |

| Table S13. Subset of CpGs (Table S11) overlapping with multiple traits in the EWAS catalogue (without the traits: age, sex, tissue, papuan ancestry) |                                                                                                                                                                        |
|------------------------------------------------------------------------------------------------------------------------------------------------------|------------------------------------------------------------------------------------------------------------------------------------------------------------------------|
| CpG                                                                                                                                                  | Traits                                                                                                                                                                 |
| cg00086488                                                                                                                                           | Pancreatic ductal adenocarcinoma; Rheumatoid arthritis                                                                                                                 |
| cg00718883                                                                                                                                           | Clear cell renal carcinoma; Gestational age                                                                                                                            |
| cg00913954                                                                                                                                           | Clear cell renal carcinoma; Gestational age; Pancreatic ductal adenocarcinoma; Preeclampsia; Primary Sjogrens syndrome                                                 |
| cg01140247                                                                                                                                           | Clear cell renal carcinoma; Gestational age; Hypertensive disorders of pregnancy                                                                                       |
| cg01326048                                                                                                                                           | alzheimers disease braak stage; Birthweight                                                                                                                            |
| cg01723892                                                                                                                                           | Clear cell renal carcinoma; gestational age; Birthweight; Hypertensive disorders of pregnancy; Pancreatic ductal adenocarcinoma; Preeclampsia; Rheumatoid arthritis    |
| cg01911077                                                                                                                                           | Birthweight; Nitrogen dioxide exposure; Gestational age; HIV infection                                                                                                 |
| cg02054431                                                                                                                                           | Alcohol consumption per day; alzheimers disease braak stage; Smoking; Maternal smoking in pregnancy; Prenatal smoke exposure                                           |
| cg02291010                                                                                                                                           | Alcohol consumption; Gestational age                                                                                                                                   |
| cg03058038                                                                                                                                           | Nitrogen dioxide exposure; Maternal overweight/obesity; Maternal body mass index;                                                                                      |
| cg03077077                                                                                                                                           | atopy; eosinophilia; Perinatally acquired HIV                                                                                                                          |
| cg03116409                                                                                                                                           | Cancer treatment: anti-metabolites; Cancer treatment: asparaginase enzymes                                                                                             |
| cg03688771                                                                                                                                           | atopy; eosinophilia                                                                                                                                                    |
| cg04434994                                                                                                                                           | atopy; eosinophilia; Rheumatoid arthritis                                                                                                                              |
| cg04872848                                                                                                                                           | television viewing time; Time spent sitting                                                                                                                            |
| cg05094137                                                                                                                                           | Clear cell renal carcinoma; Gestational age; Primary Sjogrens syndrome; Smoking                                                                                        |
| cg05399244                                                                                                                                           | Gestational age; Primary Sjogrens syndrome                                                                                                                             |
| cg05413285                                                                                                                                           | Clear cell renal carcinoma; Gestational age                                                                                                                            |
| cg06292709                                                                                                                                           | Clear cell renal carcinoma; Gestational age                                                                                                                            |
| cg07016556                                                                                                                                           | Smoking; Gestational age                                                                                                                                               |
| cg07345108                                                                                                                                           | alzheimers disease braak stage; Gestational age; Primary Sjogrens syndrome                                                                                             |
| cg07562888                                                                                                                                           | Alcohol consumption; Gestational age; Pancreatic ductal adenocarcinoma                                                                                                 |
| cg07723258                                                                                                                                           | alcohol withdrawal recovery; Chronic kidney disease; Nitrogen dioxide exposure; Preeclampsia                                                                           |
| cg07739369                                                                                                                                           | alzheimers disease braak stage; Clear cell renal carcinoma; Crohn's disease; Gestational age; Pancreatic ductal adenocarcinoma; Smoking                                |
| cg08064292                                                                                                                                           | Fetal alcohol spectrum disorder; Ulcerative colitis                                                                                                                    |
| cg08121652                                                                                                                                           | Gestational age; Hypertensive disorders of pregnancy                                                                                                                   |
| cg08262002                                                                                                                                           | Crohn's disease; Smoking; Nitrogen dioxide exposure; Maternal overweight/obesity; Maternal body mass index; Gestational age; Primary Sjogrens syndrome                 |
| cg08657492                                                                                                                                           | alzheimers disease braak stage; Alcohol consumption                                                                                                                    |
| cg08934660                                                                                                                                           | Maternal body mass index; Nitrogen dioxide exposure; Maternal overweight/obesity                                                                                       |
| cg09387528                                                                                                                                           | Smoking; Total lipids in small HDL                                                                                                                                     |
| cg09870200                                                                                                                                           | Crohn's disease; Gestational age                                                                                                                                       |
| cg10196042                                                                                                                                           | Inflammatory bowel disease; Paternal body mass index; Ulcerative colitis                                                                                               |
| cg10672416                                                                                                                                           | Smoking; Gestational age                                                                                                                                               |
| cg10807894                                                                                                                                           | Maternal overweight/obesity; Nitrogen dioxide exposure; Maternal body mass index; eosinophilia; Gestational age; Smoking                                               |
| cg11613450                                                                                                                                           | Maternal smoking in pregnancy; Prenatal smoke exposure                                                                                                                 |
| cg12463578                                                                                                                                           | Clear cell renal carcinoma; Smoking; Gestational age; Ulcerative colitis                                                                                               |
| cg12832565                                                                                                                                           | Autoantibody production in systemic lupus erythematosus; Schizophrenia                                                                                                 |
| cg13060970                                                                                                                                           | Clear cell renal carcinoma; Gestational age; Smoking                                                                                                                   |
| cg13257654                                                                                                                                           | alzheimers disease braak stage; Common carotid intima-media thickness; atopy; HIV infection                                                                            |
| cg13679804                                                                                                                                           | Gestational age; Primary Sjogrens syndrome                                                                                                                             |
| cg13689560                                                                                                                                           | Clear cell renal carcinoma; Smoking; Gestational age; Maternal smoking in pregnancy; Prenatal smoke exposure                                                           |
| cg14297063                                                                                                                                           | Alzheimer's disease; eosinophilia; Mortality                                                                                                                           |
| cg14403090                                                                                                                                           | Clear cell renal carcinoma; Gestational age                                                                                                                            |
| cg14511782                                                                                                                                           | Alcohol consumption per day; Gestational age                                                                                                                           |
| cg14873515                                                                                                                                           | alcohol withdrawal recovery; Clear cell renal carcinoma; Gestational age                                                                                               |
| cg15012214                                                                                                                                           | Clear cell renal carcinoma; Alcohol consumption                                                                                                                        |
| cg16097041                                                                                                                                           | Body mass index; C-reactive protein; Crohn's disease; Birthweight; Prenatal smoke exposure; Waist circumference                                                        |
| cg16279786                                                                                                                                           | Crohn's disease; Inflammatory bowel disease                                                                                                                            |
| cg17457637                                                                                                                                           | alzheimers disease braak stage; Alcohol consumption                                                                                                                    |
| cg17747781                                                                                                                                           | 1-hour glucose; gestational diabetes mellitus                                                                                                                          |
| cg18503679                                                                                                                                           | Alcohol consumption per day; Smoking                                                                                                                                   |
| cg18895813                                                                                                                                           | HIV infection; maternal serum polyfluoroalkyl exposure (PFOA)                                                                                                          |
| cg19299265                                                                                                                                           | Clear cell renal carcinoma; Gestational age                                                                                                                            |
| cg19405177                                                                                                                                           | Gestational age; Preeclampsia                                                                                                                                          |
| cg19411557                                                                                                                                           | atopy; eosinophilia                                                                                                                                                    |
| cg19605773                                                                                                                                           | Alzheimer's disease; Rheumatoid arthritis                                                                                                                              |
| cg19706472                                                                                                                                           | Gestational age; Schizophrenia                                                                                                                                         |
| cg20775162                                                                                                                                           | Maternal body mass index; Nitrogen dioxide exposure                                                                                                                    |
| cg20785459                                                                                                                                           | Clear cell renal carcinoma; Gestational age                                                                                                                            |
| cg21165673                                                                                                                                           | atopy; eosinophilia                                                                                                                                                    |
| cg21322819                                                                                                                                           | Smoking; Gestational age                                                                                                                                               |
| cg21462596                                                                                                                                           | Crohn's disease; Inflammatory bowel disease; Ulcerative colitis                                                                                                        |
| cg23120601                                                                                                                                           | alzheimers disease braak stage; Braak stage; Clear cell renal carcinoma; Total cholesterol to total lipids ratio in chylomicrons and XXL-VLDL                          |
| cg23632178                                                                                                                                           | alcohol withdrawal recovery; atopy; eosinophilia                                                                                                                       |
| cg24065451                                                                                                                                           | Alcohol consumption per day; Gestational age; Phospholipids to total lipids ratio in IDL; Serum high-density lipoprotein cholesterol; Total cholesterol in medium VLDL |
| cg24128943                                                                                                                                           | Clear cell renal carcinoma; Rheumatoid arthritis                                                                                                                       |
| cg24332002                                                                                                                                           | Birthweight; Gestational age; Hypertensive disorders of pregnancy                                                                                                      |
| cg24504349                                                                                                                                           | Nitrogen dioxide exposure; Gestational age; Primary Sjogrens syndrome                                                                                                  |
| cg24617171                                                                                                                                           | Maternal smoking in pregnancy; Prenatal smoke exposure                                                                                                                 |
| cg24773560                                                                                                                                           | Alcohol Consumption; Crohn's disease; eosinophilia; Gestational age; Inflammatory bowel disease; Pancreatic ductal adenocarcinoma; Rheumatoid arthritis                |
| cg25074751                                                                                                                                           | atopy; HIV infection                                                                                                                                                   |
| cg25367568                                                                                                                                           | Clear cell renal carcinoma; Maternal overweight/obesity; HIV infection; Clear cell renal carcinoma; Smoking; Gestational age; Pancreatic ductal adenocarcinoma         |
| cg25938010                                                                                                                                           | Arsenic exposure; Maternal body mass index                                                                                                                             |
| cg26272214                                                                                                                                           | Breastfeeding duration; Gestational age                                                                                                                                |
| cg26300597                                                                                                                                           | HIV infection; Primary Sjogrens syndrome; Schizophrenia                                                                                                                |
| cg27260684                                                                                                                                           | M32397_3-hydroxy-2-ethylpropionate; Gestational age; Primary Sjogrens syndrome; Right vs left colon adenomas                                                           |
| cg27367526                                                                                                                                           | homocysteine GRS; Primary Sjogrens syndrome                                                                                                                            |

| Table S14. Meta-analyses results overlapping with mQTLs from the ARIES database |                                                              |     |
|---------------------------------------------------------------------------------|--------------------------------------------------------------|-----|
| CpG                                                                             | methylation quantitative trait loci (mQTL) in ARIES database |     |
| cg00505936                                                                      |                                                              | Yes |
| cg00611227                                                                      |                                                              | Yes |
| cg00850068                                                                      |                                                              | Yes |
| cg00913954                                                                      |                                                              | Yes |
| cg00961418                                                                      |                                                              | Yes |
| cg01326048                                                                      |                                                              | Yes |
| cg01790002                                                                      |                                                              | Yes |
| cg02353154                                                                      |                                                              | Yes |
| cg02479816                                                                      |                                                              | Yes |
| cg02783833                                                                      |                                                              | Yes |
| cg03086067                                                                      |                                                              | Yes |
| cg03707256                                                                      |                                                              | Yes |
| cg04057642                                                                      |                                                              | Yes |
| cg04425110                                                                      |                                                              | Yes |
| cg04872848                                                                      |                                                              | Yes |
| cg05040501                                                                      |                                                              | Yes |
| cg05094137                                                                      |                                                              | Yes |
| cg05423392                                                                      |                                                              | Yes |
| cg05474605                                                                      |                                                              | Yes |
| cg05768032                                                                      |                                                              | Yes |
| cg06265811                                                                      |                                                              | Yes |
| cg06357940                                                                      |                                                              | Yes |
| cg06602723                                                                      |                                                              | Yes |
| cg06652210                                                                      |                                                              | Yes |
| cg07151406                                                                      |                                                              | Yes |
| cg07196761                                                                      |                                                              | Yes |
| cg07341220                                                                      |                                                              | Yes |
| cg07455279                                                                      |                                                              | Yes |
| cg07723258                                                                      |                                                              | Yes |
| cg08064292                                                                      |                                                              | Yes |
| cg08121652                                                                      |                                                              | Yes |
| cg08161480                                                                      |                                                              | Yes |
| cg08415582                                                                      |                                                              | Yes |
| cg08529295                                                                      |                                                              | Yes |
| cg08915171                                                                      |                                                              | Yes |
| cg09277575                                                                      |                                                              | Yes |
| cg09369190                                                                      |                                                              | Yes |
| cg09387528                                                                      |                                                              | Yes |
| cg09427745                                                                      |                                                              | Yes |
| cg09435668                                                                      |                                                              | Yes |
| cg09469610                                                                      |                                                              | Yes |
| cg09870200                                                                      |                                                              | Yes |
| cg10196042                                                                      |                                                              | Yes |
| cg10636896                                                                      |                                                              | Yes |
| cg10672416                                                                      |                                                              | Yes |
| cg10807894                                                                      |                                                              | Yes |
| cg11105358                                                                      |                                                              | Yes |
| cg11380667                                                                      |                                                              | Yes |
| cg12757684                                                                      |                                                              | Yes |
| cg12832565                                                                      |                                                              | Yes |
| cg13679804                                                                      |                                                              | Yes |
| cg13679817                                                                      |                                                              | Yes |
| cg13689560                                                                      |                                                              | Yes |
| cg14297063                                                                      |                                                              | Yes |
| cg14341131                                                                      |                                                              | Yes |
| cg14360448                                                                      |                                                              | Yes |
| cg14837165                                                                      |                                                              | Yes |
| cg15432367                                                                      |                                                              | Yes |
| cg15645685                                                                      |                                                              | Yes |
| cg16086237                                                                      |                                                              | Yes |
| cg16097041                                                                      |                                                              | Yes |
| cg17457637                                                                      |                                                              | Yes |
| cg17828057                                                                      |                                                              | Yes |
| cg18441811                                                                      |                                                              | Yes |
| cg18592561                                                                      |                                                              | Yes |
| cg19004775                                                                      |                                                              | Yes |
| cg19165274                                                                      |                                                              | Yes |
| cg19299265                                                                      |                                                              | Yes |
| cg19388739                                                                      |                                                              | Yes |
| cg19405177                                                                      |                                                              | Yes |
| cg20567785                                                                      |                                                              | Yes |
| cg20785459                                                                      |                                                              | Yes |
| cg21420674                                                                      |                                                              | Yes |
| cg21462596                                                                      |                                                              | Yes |
| cg21463140                                                                      |                                                              | Yes |
| cg21813747                                                                      |                                                              | Yes |
| cg22097891                                                                      |                                                              | Yes |
| cg22110973                                                                      |                                                              | Yes |
| cg22264898                                                                      |                                                              | Yes |
| cg22647970                                                                      |                                                              | Yes |
| cg23120601                                                                      |                                                              | Yes |
| cg23513183                                                                      |                                                              | Yes |
| cg23562160                                                                      |                                                              | Yes |
| cg23889772                                                                      |                                                              | Yes |
| cg24065451                                                                      |                                                              | Yes |
| cg24147838                                                                      |                                                              | Yes |
| cg24378421                                                                      |                                                              | Yes |
| cg24504349                                                                      |                                                              | Yes |
| cg24652379                                                                      |                                                              | Yes |
| cg24892433                                                                      |                                                              | Yes |
| cg25349643                                                                      |                                                              | Yes |
| cg25367568                                                                      |                                                              | Yes |
| cg25603927                                                                      |                                                              | Yes |
| cg25970491                                                                      |                                                              | Yes |
| cg27084781                                                                      |                                                              | Yes |
| cg27231292                                                                      |                                                              | Yes |
| cg27367526                                                                      |                                                              | Yes |
| cg27421105                                                                      |                                                              | Yes |
| cg27525032                                                                      |                                                              | Yes |

**Table S15. Mendelian randomization (two-sample) between the overlapping mQTL and public GWAS data**

| Exposure mQTL data |           |         |        |          |             |                 |              |                         |                |              |                |                             |             |          |
|--------------------|-----------|---------|--------|----------|-------------|-----------------|--------------|-------------------------|----------------|--------------|----------------|-----------------------------|-------------|----------|
| CpG                | SNP       | Beta    | SE     | P-value  | Sample size | Effect allele   | Other allele | Effect allele frequency | SNP chromosome | SNP position | CpG chromosome | CpG position                | mQTL effect | PubmedID |
| cg24892433         | rs9560114 | 0.383   | 0.0488 | 2.15E-15 | 834         | T               | G            | 0.2559                  | 13             | 112187882    | 13             | 112183412                   | cis         | 27036880 |
| Outcome GWAS data  |           |         |        |          |             |                 |              |                         |                |              |                |                             |             |          |
| Trait              | SNP       | Beta    | SE     | P-value  | Sample size | Effect allele   | Other allele | Effect allele frequency | SNP chromosome | SNP position | OR             | 95% CI                      |             | PubmedID |
| Type 2 diabetes    | rs9560114 | -0.0259 | 0.0047 | 3.30E-08 | 1335930     | T               | G            | 0.2435                  | 13             | 112187882    | 0.0259         | [0.017-0.035] unit decrease |             | 32541925 |
| MR results         |           |         |        |          |             |                 |              |                         |                |              |                |                             |             |          |
| CpG                | SNP       | Beta    | SE     | P-value  | Method      | Trait           |              |                         |                |              |                |                             |             |          |
| cg24892433         | rs9560114 | -0.0676 | 0.0122 | 3.58E-08 | Wald ratio  | Type 2 diabetes |              |                         |                |              |                |                             |             |          |

**Table S16. Overlapping CpGs between meta-analyses results (FDR <0.05) and blood cis-eQTMs in children of the HELIX project (cell type adjusted)**

| Meta-analysis results of associations between dietary glycemic index and glycemic load and blood DNA methylation (FDR <0.05) |                                       |              |                  |                |                 |                       |           | Results of blood cis-eQTMs in children of the HELIX project (cell type adjusted) |                 |                                                 |                                                                     |                |                                         |
|------------------------------------------------------------------------------------------------------------------------------|---------------------------------------|--------------|------------------|----------------|-----------------|-----------------------|-----------|----------------------------------------------------------------------------------|-----------------|-------------------------------------------------|---------------------------------------------------------------------|----------------|-----------------------------------------|
| CpG                                                                                                                          | Nearest Gene<br>(Illumina annotation) | Total number | Beta coefficient | Standard error | nominal P-value | FDR-corrected P-value | I-squared | Meta-analysis model                                                              | Transcript      | Genes annotated according<br>to Affymetrix na36 | Change in expression as log2 fold<br>change per 10% DNA methylation | Standard error | P-value of the<br>CpG-TC<br>association |
| cg05474605                                                                                                                   | SEPP1                                 | 209          | 0.02579          | 0.0036         | 2.71e-12        | 4.65e-07              | 64.7      | Glycemic load (overweight/obese)                                                 | TC05002348.hg.1 | CCDC152                                         | 0.1905                                                              | 0.4751         | 6.65e-05                                |
| cg05474605                                                                                                                   | SEPP1                                 | 209          | 0.02579          | 0.0036         | 2.71e-12        | 4.65e-07              | 64.7      | Glycemic load (overweight/obese)                                                 | TC05000193.hg.1 | CCDC152                                         | 0.1691                                                              | 0.4024         | 2.91e-05                                |
| cg01723892                                                                                                                   |                                       | 209          | 0.02489          | 0.0037         | 4.25e-11        | 4.53e-06              | 89.8      | Glycemic load (overweight/obese)                                                 | TC01001926.hg.1 | NTPCR                                           | 0.1989                                                              | 0.3192         | 7.41e-10                                |
| cg07151406                                                                                                                   | PGAM1                                 | 210          | 0.40221          | 0.0609         | 4.01e-11        | 6.98e-06              | 95.4      | Glycemic index (overweight/obese)                                                | TC10000695.hg.1 | PGAM1                                           | -0.073                                                              | 0.1202         | 1.69e-09                                |
| cg07151406                                                                                                                   | PGAM1                                 | 210          | 0.40221          | 0.0609         | 4.01e-11        | 6.98e-06              | 95.4      | Glycemic index (overweight/obese)                                                | TC10000692.hg.1 | FRAT1                                           | 0.0596                                                              | 0.1422         | 3.01e-05                                |
| cg13060970                                                                                                                   | PLEK                                  | 209          | 0.03008          | 0.0048         | 5.71e-10        | 0.0003                | 80.1      | Glycemic load (overweight/obese)                                                 | TC02000398.hg.1 | PLEK                                            | -0.324                                                              | 0.4576         | 2.98e-12                                |
| cg17828057                                                                                                                   | PLAT                                  | 386          | -0.3613          | 0.0572         | 2.75e-10        | 0.0003                | 80.8      | Glycemic index (overweight/obese)                                                | TC08003324.hg.1 | AP3M2                                           | -0.051                                                              | 0.0829         | 1.06e-09                                |
| cg07723258                                                                                                                   | MED24                                 | 208          | -0.0193          | 0.0031         | 1.10e-09        | 0.0005                | 0         | Glycemic load (overweight/obese)                                                 | TC17001453.hg.1 | PGAP3                                           | -0.062                                                              | 0.1163         | 1.10e-07                                |
| cg07723258                                                                                                                   | MED24                                 | 208          | -0.0193          | 0.0031         | 1.10e-09        | 0.0005                | 0         | Glycemic load (overweight/obese)                                                 | TC17002851.hg.1 | GSDMB                                           | -0.101                                                              | 0.2280         | 1.06e-05                                |
| cg03086067                                                                                                                   | SH2D4B                                | 209          | 0.17207          | 0.0313         | 3.85e-08        | 0.0008                | 72.7      | Glycemic load (overweight/obese)                                                 | TC10001464.hg.1 | LOC101929574                                    | 0.0301                                                              | 0.0523         | 1.23e-08                                |
| cg03086067                                                                                                                   | SH2D4B                                | 209          | 0.17207          | 0.0313         | 3.85e-08        | 0.0008                | 72.7      | Glycemic load (overweight/obese)                                                 | TC10002736.hg.1 |                                                 | 0.0226                                                              | 0.0453         | 7.44e-07                                |
| cg00961418                                                                                                                   | STK33                                 | 385          | 0.16035          | 0.0287         | 2.43e-08        | 0.00130               | 74.4      | Glycemic index (overweight/obese)                                                | TC11001386.hg.1 | STK33                                           | -0.091                                                              | 0.0799         | 3.42e-28                                |
| cg04872848                                                                                                                   | FLVCR2                                | 209          | 0.04861          | 0.0094         | 2.99e-07        | 0.00348               | 0         | Glycemic load (overweight/obese)                                                 | TC14002303.hg.1 | FLVCR2                                          | -0.065                                                              | 0.1584         | 3.43e-05                                |
| cg25603927                                                                                                                   | PGAM1                                 | 386          | 0.36722          | 0.0699         | 1.49e-07        | 0.00521               | 88.0      | Glycemic index (overweight/obese)                                                | TC10000695.hg.1 | PGAM1                                           | -0.060                                                              | 0.0966         | 7.04e-10                                |
| cg27284034                                                                                                                   | CTR81                                 | 209          | 0.02188          | 0.0044         | 7.89e-07        | 0.00656               | 0         | Glycemic load (overweight/obese)                                                 | TC16001283.hg.1 | ADAT1                                           | -0.092                                                              | 0.2367         | 9.33e-05                                |
| cg07341220                                                                                                                   | IFT140/TMEM204                        | 268          | -0.3613          | 0.0700         | 2.54e-07        | 0.00770               | 34.7      | Glycemic index (overweight/obese)                                                | TC16000043.hg.1 | TMEM204                                         | -0.112                                                              | 0.0730         | 1.73e-47                                |
| cg21900799                                                                                                                   | PLEC1                                 | 209          | -0.0575          | 0.0118         | 1.13e-06        | 0.00795               | 75.4      | Glycemic load (overweight/obese)                                                 | TC08000835.hg.1 | GRINA                                           | -0.066                                                              | 0.0924         | 1.80e-12                                |
| cg21900799                                                                                                                   | PLEC1                                 | 209          | -0.0575          | 0.0118         | 1.13e-06        | 0.00795               | 75.4      | Glycemic load (overweight/obese)                                                 | TC08001739.hg.1 | PARP10                                          | -0.033                                                              | 0.0503         | 3.66e-11                                |
| cg21900799                                                                                                                   | PLEC1                                 | 209          | -0.0575          | 0.0118         | 1.13e-06        | 0.00795               | 75.4      | Glycemic load (overweight/obese)                                                 | TC08001737.hg.1 | PLEC                                            | -0.069                                                              | 0.0587         | 6.51e-30                                |
| cg14736911                                                                                                                   | MYO22                                 | 209          | -0.0504          | 0.0103         | 1.24e-06        | 0.00847               | 57.8      | Glycemic load (overweight/obese)                                                 | TC04000611.hg.1 | USP53                                           | -0.958                                                              | 0.3542         | 2.42e-115                               |
| cg14736911                                                                                                                   | MYO22                                 | 209          | -0.0504          | 0.0103         | 1.24e-06        | 0.00847               | 57.8      | Glycemic load (overweight/obese)                                                 | TC04001498.hg.1 | LOC101929762                                    | -0.041                                                              | 0.0800         | 3.35e-07                                |
| cg08657492                                                                                                                   | H0XA4                                 | 386          | -0.3903          | 0.0775         | 4.80e-07        | 0.01112               | 35.6      | Glycemic index (overweight/obese)                                                | TC07000165.hg.1 | HOTAIRM1                                        | 0.0347                                                              | 0.0791         | 1.26e-05                                |
| cg08657492                                                                                                                   | H0XA4                                 | 386          | -0.3903          | 0.0775         | 4.80e-07        | 0.01112               | 35.6      | Glycemic index (overweight/obese)                                                | TC07002209.hg.1 | HOTAIRM1                                        | 0.0644                                                              | 0.1470         | 1.32e-05                                |
| cg08657492                                                                                                                   | H0XA4                                 | 386          | -0.3903          | 0.0775         | 4.80e-07        | 0.01112               | 35.6      | Glycemic index (overweight/obese)                                                | TC07003352.hg.1 | H0XA4                                           | -0.021                                                              | 0.0352         | 2.24e-09                                |
| cg02353154                                                                                                                   |                                       | 209          | 0.03554          | 0.0074         | 1.96e-06        | 0.01167               | 34.0      | Glycemic load (overweight/obese)                                                 | TC10002953.hg.1 | CUZD1                                           | -0.041                                                              | 0.0955         | 1.47e-05                                |
| cg23513183                                                                                                                   |                                       | 209          | -0.0244          | 0.0051         | 2.21e-06        | 0.01251               | 9.03      | Glycemic load (overweight/obese)                                                 | TC19000059.hg.1 | ZNF555                                          | 0.0627                                                              | 0.0896         | 5.35e-12                                |
| cg24309215                                                                                                                   |                                       | 209          | 0.04984          | 0.0105         | 2.47e-06        | 0.01337               | 0         | Glycemic load (overweight/obese)                                                 | TC12003258.hg.1 | GATC                                            | -0.059                                                              | 0.1302         | 6.10e-06                                |
| cg24309215                                                                                                                   |                                       | 209          | 0.04984          | 0.0105         | 2.47e-06        | 0.01337               | 0         | Glycemic load (overweight/obese)                                                 | TC12002614.hg.1 | GATC                                            | -0.060                                                              | 0.1433         | 2.95e-05                                |
| cg24309215                                                                                                                   |                                       | 209          | 0.04984          | 0.0105         | 2.47e-06        | 0.01337               | 0         | Glycemic load (overweight/obese)                                                 | TC12002049.hg.1 | POPS                                            | -0.045                                                              | 0.0842         | 9.84e-08                                |
| cg03707256                                                                                                                   |                                       | 205          | -0.0084          | 0.0018         | 2.88e-06        | 0.01464               | 0         | Glycemic load (overweight/obese)                                                 | TC05000119.hg.1 |                                                 | -0.131                                                              | 0.3263         | 5.94e-05                                |
| cg17457637                                                                                                                   | H0XA4                                 | 386          | -0.3149          | 0.0642         | 9.54e-07        | 0.01540               | 26.5      | Glycemic index (overweight/obese)                                                | TC07002209.hg.1 | HOTAIRM1                                        | 0.0833                                                              | 0.1632         | 4.13e-07                                |
| cg17457637                                                                                                                   | H0XA4                                 | 386          | -0.3149          | 0.0642         | 9.54e-07        | 0.01540               | 26.5      | Glycemic index (overweight/obese)                                                | TC07003352.hg.1 | H0XA4                                           | -0.022                                                              | 0.0394         | 2.43e-08                                |
| cg17457637                                                                                                                   | H0XA4                                 | 386          | -0.3149          | 0.0642         | 9.54e-07        | 0.01540               | 26.5      | Glycemic index (overweight/obese)                                                | TC07000165.hg.1 | HOTAIRM1                                        | 0.0460                                                              | 0.0877         | 1.98e-07                                |
| cg24147838                                                                                                                   | LAIR1                                 | 801          | 0.12649          | 0.0256         | 8.00e-07        | 0.01546               | 0         | Glycemic index (normal weight)                                                   | TC19002659.hg.1 | KIR2DL1                                         | -0.339                                                              | 0.7519         | 7.23e-06                                |
| cg24147838                                                                                                                   | LAIR1                                 | 801          | 0.12649          | 0.0256         | 8.00e-07        | 0.01546               | 0         | Glycemic index (normal weight)                                                   | TC19001844.hg.1 | LAIR1                                           | -0.208                                                              | 0.1933         | 2.42e-25                                |
| cg24147838                                                                                                                   | LAIR1                                 | 801          | 0.12649          | 0.0256         | 8.00e-07        | 0.01546               | 0         | Glycemic index (normal weight)                                                   | TC19002661.hg.1 | KIR2DL3                                         | -0.327                                                              | 0.7538         | 1.62e-05                                |
| cg24147838                                                                                                                   | LAIR1                                 | 801          | 0.12649          | 0.0256         | 8.00e-07        | 0.01546               | 0         | Glycemic index (normal weight)                                                   | TC19002657.hg.1 | KIR3DL1                                         | -0.222                                                              | 0.5370         | 3.76e-05                                |
| cg24147838                                                                                                                   | LAIR1                                 | 801          | 0.12649          | 0.0256         | 8.00e-07        | 0.01546               | 0         | Glycemic index (normal weight)                                                   | TC19002236.hg.1 |                                                 | -0.348                                                              | 0.8520         | 4.75e-05                                |
| cg24147838                                                                                                                   | LAIR1                                 | 801          | 0.12649          | 0.0256         | 8.00e-07        | 0.01546               | 0         | Glycemic index (normal weight)                                                   | TC19000879.hg.1 | LAIR2                                           | -0.145                                                              | 0.3361         | 1.62e-05                                |
| cg10672416                                                                                                                   | C12orf65                              | 208          | 0.01908          | 0.0041         | 4.37e-06        | 0.01938               | 0         | Glycemic load (overweight/obese)                                                 | TC12000983.hg.1 | C12orf65                                        | -0.062                                                              | 0.1274         | 1.16e-06                                |
| cg07455279                                                                                                                   | NDUFA3                                | 209          | -0.0452          | 0.0099         | 4.98e-06        | 0.02070               | 0         | Glycemic load (overweight/obese)                                                 | TC19001832.hg.1 | TFPT                                            | -0.052                                                              | 0.0596         | 5.00e-18                                |
| cg07455279                                                                                                                   | NDUFA3                                | 209          | -0.0452          | 0.0099         | 4.98e-06        | 0.02070               | 0         | Glycemic load (overweight/obese)                                                 | TC19001836.hg.1 | TMCA                                            | 0.0147                                                              | 0.0368         | 7.31e-05                                |
| cg23889772                                                                                                                   | COL5A3                                | 386          | -0.1412          | 0.0296         | 1.83e-06        | 0.02092               | 67.4      | Glycemic index (overweight/obese)                                                | TC19001156.hg.1 | COL5A3                                          | 0.0287                                                              | 0.0382         | 1.34e-13                                |
| cg27254338                                                                                                                   | C17orf66                              | 209          | 0.01985          | 0.0043         | 6.38e-06        | 0.02405               | 49.1      | Glycemic load (overweight/obese)                                                 | TC17001378.hg.1 | CCL5                                            | -0.303                                                              | 0.4352         | 6.01e-12                                |
| cg27254338                                                                                                                   | C17orf66                              | 209          | 0.01985          | 0.0043         | 6.38e-06        | 0.02405               | 49.1      | Glycemic load (overweight/obese)                                                 | TC17001377.hg.1 | HEATR9                                          | -0.054                                                              | 0.1095         | 7.05e-07                                |
| cg12463578                                                                                                                   | ZFP57                                 | 159          | -0.0611          | 0.0135         | 6.65e-06        | 0.02453               | 65.1      | Glycemic load (overweight/obese)                                                 | TC06002692.hg.1 |                                                 | 0.0352                                                              | 0.0685         | 3.52e-07                                |
| cg12463578                                                                                                                   | ZFP57                                 | 159          | -0.0611          | 0.0135         | 6.65e-06        | 0.02453               | 65.1      | Glycemic load (overweight/obese)                                                 | TC06002688.hg.1 |                                                 | -0.030                                                              | 0.0645         | 2.20e-06                                |
| cg12463578                                                                                                                   | ZFP57                                 | 159          | -0.0611          | 0.0135         | 6.65e-06        | 0.02453               | 65.1      | Glycemic load (overweight/obese)                                                 | TC06000325.hg.1 | LOC554223                                       | -0.019                                                              | 0.0404         | 2.09e-06                                |
| cg12463578                                                                                                                   | ZFP57                                 | 159          | -0.0611          | 0.0135         | 6.65e-06        | 0.02453               | 65.1      | Glycemic load (overweight/obese)                                                 | TC06001486.hg.1 | ZFP57                                           | -0.100                                                              | 0.0493         | 2.99e-75                                |
| cg12463578                                                                                                                   | ZFP57                                 | 159          | -0.0611          | 0.0135         | 6.65e-06        | 0.02453               | 65.1      | Glycemic load (overweight/obese)                                                 | TC06000323.hg.1 | HLA-F                                           | -0.046                                                              | 0.0548         | 1.01e-16                                |
| cg12463578                                                                                                                   | ZFP57                                 | 159          | -0.0611          | 0.0135         | 6.65e-06        | 0.02453               | 65.1      | Glycemic load (overweight/obese)                                                 | TC06000327.hg.1 | HLA-K                                           | 0.0315                                                              | 0.0676         | 3.60e-06                                |
| cg25970491                                                                                                                   | CLTCL1                                | 209          | 0.02902          | 0.0065         | 8.30e-06        | 0.02740               | 68.2      | Glycemic load (overweight/obese)                                                 | TC22000487.hg.1 | CLTCL1                                          | -0.044                                                              | 0.0679         | 1.12e-10                                |
| cg09469610                                                                                                                   |                                       | 209          | 0.02251          | 0.0050         | 8.50e-06        | 0.02779               | 82.4      | Glycemic load (overweight/obese)                                                 | TC15000625.hg.1 | MAP2K5                                          | -0.088                                                              | 0.1640         | 8.33e-08                                |
| cg21462596                                                                                                                   | PRTN3                                 | 209          | 0.04478          | 0.0100         | 8.93e-06        | 0.02891               | 0         | Glycemic load (overweight/obese)                                                 | TC19000030.hg.1 | CFD                                             | -0.180                                                              | 0.3454         | 2.07e-07                                |
| cg07345108                                                                                                                   | WOFY4                                 | 209          | 0.01756          | 0.0039         | 9.18e-06        | 0.02986               | 38.2      | Glycemic load (overweight/obese)                                                 | TC10000323.hg.1 | WOFY4                                           | -0.225                                                              | 0.348          | 2.70e-05                                |
| cg19165274                                                                                                                   | AKR1E2                                | 209          | -0.0600          | 0.0135         | 9.31e-06        | 0.02986               | 42.6      | Glycemic load (overweight/obese)                                                 | TC10000039.hg.1 | AKR1E2                                          | -0.112                                                              | 0.1501         | 1.64e-13                                |
| cg19165274                                                                                                                   | AKR1E2                                | 209          | -0.0600          | 0.0135         | 9.31e-06        | 0.02986               | 42.6      | Glycemic load (overweight/obese)                                                 | TC10002924.hg.1 | AKR1C1                                          | -0.055                                                              | 0.0991         | 2.76e-08                                |
| cg00850068                                                                                                                   | ANGPTL4                               | 386          | -0.0670          | 0.0145         | 4.12e-06        | 0.03283               | 74.8      | Glycemic index (overweight/obese)                                                | TC19000150.hg.1 | MARCH2                                          | 0.1760                                                              | 0.3855         | 5.76e-06                                |
| cg01790002                                                                                                                   | EVX1                                  | 386          | -0.0676          | 0.0147         | 4.37e-06        | 0.03384               | 0         | Glycemic index (overweight/obese)                                                | TC07002854.hg.1 | H0XA10                                          | 0.1260                                                              | 0.3144         | 6.68e-05                                |
| cg09387528                                                                                                                   |                                       | 209          | 0.01890          | 0.0043         | 1.28e-05        | 0.03497               | 42.7      | Glycemic load (overweight/obese)                                                 | TC12000260.hg.1 | PCNT                                            | -0.122                                                              | 0.1628         | 1.17e-13                                |
| cg09387528                                                                                                                   |                                       | 209          | 0.01890          | 0.0043         | 1.28e-05        | 0.03497               | 42.7      | Glycemic load (overweight/obese)                                                 | TC12000261.hg.1 | DIP2A                                           | -0.410                                                              | 0.3258         | 2.59e-33                                |
| cg09387528                                                                                                                   |                                       | 209          | 0.01890          | 0.0043         | 1.28e-05        | 0.03497               | 42.7      | Glycemic load (overweight/obese)                                                 | TC12000801.hg.1 |                                                 | -0.539                                                              | 0.9780         | 4.76e-08                                |
| cg09387528                                                                                                                   |                                       | 209          | 0.01890          | 0.0043         | 1.28e-05        | 0.03497               | 42.7      | Glycemic load (overweight/obese)                                                 | TC12000559.hg.1 | S100B                                           | -0.154                                                              | 0.3274         | 2.67e-06                                |
| cg09387528                                                                                                                   |                                       | 209          | 0.01890          | 0.0043         | 1.28e-05        | 0.03497               | 42.7      | Glycemic load (overweight/obese)                                                 | TC12000265.hg.1 | PRMT2                                           | -0.232                                                              | 0.3654         | 3.36e-10                                |
| cg09387528                                                                                                                   |                                       | 209          | 0.01890          | 0.0043         | 1.28e-05        | 0.03497               | 42.7      | Glycemic load (overweight/obese)                                                 | TC12000262.hg.1 | DIP2A-IT1                                       | -0.195                                                              | 0.4037         | 1.54e-06                                |
| cg08262002                                                                                                                   | LDB2                                  | 386          | 0.17357          | 0.0379         | 4.66e-06        | 0.03568               | 70.3      | Glycemic index (overweight/obese)                                                | TC04001062.hg.1 | LDB2                                            | 0.0422                                                              | 0.0969         | 1.46e-05                                |
| cg25446789                                                                                                                   | DTN8                                  | 386          | 0.19182          | 0.0419         | 4.81e-06        | 0.03640               | 82.1      | Glycemic index (overweight/obese)                                                | TC02001658.hg.1 | DNMT3A                                          | 0.0510                                                              | 0.1165         | 1.31e-05                                |
| cg19405177                                                                                                                   | PLEC1                                 | 209          | -0.0887          | 0.0205         | 1.54e-05        | 0.03941               | 84.6      | Glycemic load (overweight/obese)                                                 | TC08001737.hg.1 | PLEC                                            | -0.043                                                              | 0.0435         | 6.01e-22                                |
| cg19405177                                                                                                                   | PLEC1                                 | 209          | -0.0887          | 0.0205         | 1.54e-05        | 0.03941               | 84.6      | Glycemic load (overweight/obese)                                                 | TC08000841.hg.1 | MAF1                                            | -0.019                                                              | 0.0458         | 3.45e-05                                |
| cg19405177                                                                                                                   | PLEC1                                 | 209          | -0.0887          | 0.0205         | 1.54e-05        | 0.03941               | 84.6      | Glycemic load (overweight/obese)                                                 | TC08001739.hg.1 | PARP10                                          | -0.026                                                              | 0.0363         | 8.15e-13                                |
| cg19405177                                                                                                                   | PLEC1                                 | 209          | -0.0887          | 0.0205         | 1.54e-05        | 0.03941               | 84.6      | Glycemic load (overweight/obese)                                                 | TC08000835.hg.1 | GRINA                                           | -0.049                                                              | 0.0669         | 2.35e-13                                |
| cg02479816                                                                                                                   | ZNF317                                | 386          | 0.07379          | 0.0162         | 5.85e-06        | 0.03944               | 76.3      | Glycemic index (overweight/obese)                                                | TC19001146.hg.1 | ZNF266                                          | -0.364                                                              | 0.7549         | 1.69e-06                                |
| cg02291010                                                                                                                   | CAST                                  | 93           |                  |                |                 |                       |           |                                                                                  |                 |                                                 |                                                                     |                |                                         |



| Table S17. Overlapping CpGs between meta-analyses results (FDR <0.05) and subcutaneous adipose tissue cis-eQTM in children and adolescents of the Leipzig Childhood Adipose Tissue Cohort |                                    |              |                  |                |                 |                       |           |                                   |              |                                                  |          |                |          |                 |  |
|-------------------------------------------------------------------------------------------------------------------------------------------------------------------------------------------|------------------------------------|--------------|------------------|----------------|-----------------|-----------------------|-----------|-----------------------------------|--------------|--------------------------------------------------|----------|----------------|----------|-----------------|--|
| Meta-analysis results of associations between dietary glycemic index and glycemic load and blood DNA methylation (FDR <0.05)                                                              |                                    |              |                  |                |                 |                       |           |                                   |              | Results of subcutaneous adipose tissue cis-eQTMs |          |                |          |                 |  |
| CpG                                                                                                                                                                                       | Nearest Gene (Illumina annotation) | Total number | Beta coefficient | Standard error | nominal P-value | FDR-corrected P-value | I-squared | Meta-analysis model               | ILMN.ID      | Transcript                                       | Estimate | Standard error | P-value  | Ensemble ID     |  |
| cg05399244                                                                                                                                                                                | RPH3AL                             | 386          | -0.1531          | 0.0226         | 1.29e-11        | 2.99e-06              | 82.8      | Glycemic index (overweight/obese) | ILMN_1770206 | GEMIN4                                           | 0.9589   | 0.2152         | 1.34e-05 | ENST00000319004 |  |
| cg13060970                                                                                                                                                                                | PLEK                               | 209          | 0.0300           | 0.0048         | 5.71e-10        | 0.0003                | 80.1      | Glycemic load (overweight/obese)  | ILMN_1795762 | PLEK                                             | -2.8138  | 0.6974         | 7.56e-05 | ENST00000234313 |  |
| cg13060970                                                                                                                                                                                | PLEK                               | 209          | 0.0300           | 0.0048         | 5.71e-10        | 0.0003                | 80.1      | Glycemic load (overweight/obese)  | ILMN_1777998 | ARHGAP25                                         | -1.4796  | 0.2932         | 9.51e-07 | ENST00000409030 |  |
| cg13060970                                                                                                                                                                                | PLEK                               | 209          | 0.0300           | 0.0048         | 5.71e-10        | 0.0003                | 80.1      | Glycemic load (overweight/obese)  | ILMN_3232894 | CNRP1                                            | 1.7888   | 0.4075         | 1.76e-05 | ENST00000263655 |  |
| cg07723258                                                                                                                                                                                | MED24                              | 208          | -0.0193          | 0.0031         | 1.10e-09        | 0.0003                | 0         | Glycemic load (overweight/obese)  | ILMN_2327269 | CSF3                                             | -2.4054  | 0.4422         | 1.42e-07 | ENST00000225474 |  |
| cg07723258                                                                                                                                                                                | MED24                              | 208          | -0.0193          | 0.0031         | 1.10e-09        | 0.0005                | 0         | Glycemic load (overweight/obese)  | ILMN_1697069 | CSF3                                             | -2.1655  | 0.4111         | 3.30e-07 | ENST00000225474 |  |
| cg27260684                                                                                                                                                                                | KIAA0513                           | 209          | 0.0195           | 0.0033         | 3.48e-09        | 0.0017                | 55.6      | Glycemic load (overweight/obese)  | ILMN_1721116 | USP10                                            | -0.5340  | 0.1336         | 8.81e-05 | ENST00000219473 |  |
| cg27260684                                                                                                                                                                                | KIAA0513                           | 209          | 0.0195           | 0.0033         | 3.48e-09        | 0.0017                | 55.6      | Glycemic load (overweight/obese)  | ILMN_1703314 | KIHL36                                           | -1.1392  | 0.1901         | 8.48e-09 | ENST00000564996 |  |
| cg27260684                                                                                                                                                                                | KIAA0513                           | 209          | 0.0195           | 0.0033         | 3.48e-09        | 0.0017                | 55.6      | Glycemic load (overweight/obese)  | ILMN_1693233 | KIAA0513                                         | -0.7720  | 0.1384         | 7.22e-08 | ENST00000683633 |  |
| cg14403090                                                                                                                                                                                |                                    | 209          | -0.0050          | 0.0009         | 1.20e-07        | 0.00178               | 66.3      | Glycemic load (overweight/obese)  | ILMN_1753111 | NAMPT                                            | 1.9697   | 0.3482         | 4.82e-08 | ENST00000491027 |  |
| cg14403090                                                                                                                                                                                |                                    | 209          | -0.0050          | 0.0009         | 1.20e-07        | 0.00178               | 66.3      | Glycemic load (overweight/obese)  | ILMN_1753111 | NAMPT                                            | 1.9697   | 0.3482         | 4.82e-08 | ENST00000489732 |  |
| cg14403090                                                                                                                                                                                |                                    | 209          | -0.0050          | 0.0009         | 1.20e-07        | 0.00178               | 66.3      | Glycemic load (overweight/obese)  | ILMN_1753111 | NAMPT                                            | 1.9697   | 0.3482         | 4.82e-08 | ENST00000417537 |  |
| cg14403090                                                                                                                                                                                |                                    | 209          | -0.0050          | 0.0009         | 1.20e-07        | 0.00178               | 66.3      | Glycemic load (overweight/obese)  | ILMN_1753111 | NAMPT                                            | 1.9697   | 0.3482         | 4.82e-08 | ENST00000424768 |  |
| cg14403090                                                                                                                                                                                |                                    | 209          | -0.0050          | 0.0009         | 1.20e-07        | 0.00178               | 66.3      | Glycemic load (overweight/obese)  | ILMN_1753111 | NAMPT                                            | 1.9697   | 0.3482         | 4.82e-08 | ENST00000441045 |  |
| cg14403090                                                                                                                                                                                |                                    | 209          | -0.0050          | 0.0009         | 1.20e-07        | 0.00178               | 66.3      | Glycemic load (overweight/obese)  | ILMN_1653871 | NAMPT                                            | 2.5983   | 0.5220         | 1.30e-06 | ENST0000022553  |  |
| cg14403090                                                                                                                                                                                |                                    | 209          | -0.0050          | 0.0009         | 1.20e-07        | 0.00178               | 66.3      | Glycemic load (overweight/obese)  | ILMN_1753111 | NAMPT                                            | 1.9697   | 0.3482         | 4.82e-08 | ENST00000354289 |  |
| cg14403090                                                                                                                                                                                |                                    | 209          | -0.0050          | 0.0009         | 1.20e-07        | 0.00178               | 66.3      | Glycemic load (overweight/obese)  | ILMN_1753111 | NAMPT                                            | 1.9697   | 0.3482         | 4.82e-08 | ENST00000489358 |  |
| cg19388739                                                                                                                                                                                |                                    | 209          | 0.0287           | 0.0055         | 2.46e-07        | 0.00306               | 49.0      | Glycemic load (overweight/obese)  | ILMN_1784737 | S1PR4                                            | -0.4044  | 0.0870         | 5.87e-06 | ENST00000246115 |  |
| cg07980773                                                                                                                                                                                | GRB2                               | 219          | 0.1945           | 0.0359         | 6.06e-08        | 0.00383               | 0         | Glycemic index (normal weight)    | ILMN_1806432 | NTSC                                             | 1.7585   | 0.3325         | 2.99e-07 | ENST00000245552 |  |
| cg06870764                                                                                                                                                                                |                                    | 116          | 0.0080           | 0.0015         | 3.87e-07        | 0.00412               | 72.7      | Glycemic load (overweight/obese)  | ILMN_3180557 | CYB561D1                                         | 0.6216   | 0.1274         | 2.07e-06 | ENST00000430195 |  |
| cg06870764                                                                                                                                                                                |                                    | 116          | 0.0080           | 0.0015         | 3.87e-07        | 0.00412               | 72.7      | Glycemic load (overweight/obese)  | ILMN_1750790 | GSTM5                                            | 1.9165   | 0.4000         | 3.06e-06 | ENST00000256593 |  |
| cg06870764                                                                                                                                                                                |                                    | 116          | 0.0080           | 0.0015         | 3.87e-07        | 0.00412               | 72.7      | Glycemic load (overweight/obese)  | ILMN_3263235 | CYB561D1                                         | 0.7945   | 0.1985         | 8.58e-05 | ENST00000430578 |  |
| cg05887771                                                                                                                                                                                | OSBP2                              | 219          | 0.2484           | 0.0468         | 1.15e-07        | 0.0037                | 63.2      | Glycemic index (normal weight)    | ILMN_1780546 | CSM4                                             | -2.3238  | 0.2898         | 3.31e-14 | ENST00000215781 |  |
| cg27284034                                                                                                                                                                                | CTRB1                              | 209          | 0.0218           | 0.0044         | 7.89e-07        | 0.00656               | 0         | Glycemic load (overweight/obese)  | ILMN_1795428 | WDR59                                            | 2.3178   | 0.5402         | 2.67e-05 | ENST00000262144 |  |
| cg22681041                                                                                                                                                                                | GHR                                | 116          | -0.0486          | 0.0099         | 1.15e-06        | 0.00795               | 0         | Glycemic load (overweight/obese)  | ILMN_2098616 | Csor39                                           | 0.7216   | 0.1746         | 5.09e-05 | ENST00000616064 |  |
| cg06086465                                                                                                                                                                                | COL5A1                             | 116          | -0.0201          | 0.0041         | 1.29e-06        | 0.00865               | 84.8      | Glycemic load (overweight/obese)  | ILMN_1668063 | FCN1                                             | 3.3142   | 0.7086         | 5.09e-06 | ENST00000371806 |  |
| cg00176020                                                                                                                                                                                | ADORA2A-AS1                        | 116          | 0.0325           | 0.0067         | 1.56e-06        | 0.00976               | 0         | Glycemic load (overweight/obese)  | ILMN_1814044 | CABIN1                                           | 1.2123   | 0.2922         | 4.79e-05 | ENST00000263119 |  |
| cg02184558                                                                                                                                                                                | DUS2                               | 219          | 1.2527           | 0.2450         | 3.19e-07        | 0.01058               | 62.8      | Glycemic index (normal weight)    | ILMN_1731275 | DPEP3                                            | -0.3427  | 0.0711         | 2.75e-06 | ENST00000672962 |  |
| cg02184558                                                                                                                                                                                | DUS2                               | 219          | 1.2527           | 0.2450         | 3.19e-07        | 0.01058               | 62.8      | Glycemic index (normal weight)    | ILMN_1787324 | C16orf48                                         | 0.7912   | 0.1877         | 3.67e-05 | ENST00000243878 |  |
| cg12023232                                                                                                                                                                                |                                    | 219          | -0.1984          | 0.0395         | 5.05e-07        | 0.01133               | 90.2      | Glycemic index (normal weight)    | ILMN_2408039 | EEF1D                                            | -2.6111  | 0.5764         | 9.71e-06 | ENST00000619144 |  |
| cg12023232                                                                                                                                                                                |                                    | 219          | -0.1984          | 0.0395         | 5.05e-07        | 0.01133               | 90.2      | Glycemic index (normal weight)    | ILMN_1782543 | EEF1D                                            | -2.5990  | 0.6029         | 2.45e-05 | ENST00000619144 |  |
| cg14051770                                                                                                                                                                                | ZP3                                | 801          | 0.1194           | 0.0237         | 4.99e-07        | 0.01133               | 93.8      | Glycemic index (normal weight)    | ILMN_3241036 | SNORA14A                                         | -1.1326  | 0.2257         | 1.08e-06 | ENST00000364773 |  |
| cg15264825                                                                                                                                                                                | ACKR2                              | 219          | 0.2391           | 0.0479         | 6.01e-07        | 0.01229               | 0         | Glycemic index (normal weight)    | ILMN_1699440 | ZBTB47                                           | -1.0355  | 0.1998         | 4.97e-07 | ENST00000232974 |  |
| cg15264825                                                                                                                                                                                | ACKR2                              | 219          | 0.2391           | 0.0479         | 6.01e-07        | 0.01229               | 0         | Glycemic index (normal weight)    | ILMN_1658398 | C3orf41                                          | -0.6466  | 0.1611         | 8.27e-05 | ENST00000488863 |  |
| cg03764753                                                                                                                                                                                |                                    | 116          | 0.0336           | 0.0071         | 2.24e-06        | 0.01251               | 56.1      | Glycemic load (overweight/obese)  | ILMN_1667925 | PDC13                                            | 0.4816   | 0.1076         | 1.23e-05 | ENST00000398028 |  |
| cg07739369                                                                                                                                                                                |                                    | 209          | 0.0218           | 0.0046         | 2.61e-06        | 0.01251               | 79.6      | Glycemic load (overweight/obese)  | ILMN_2364022 | SLC16A3                                          | -2.8393  | 0.5280         | 1.93e-07 | ENST00000582743 |  |
| cg24147838                                                                                                                                                                                | LAI1R1                             | 801          | 0.1264           | 0.0256         | 8.00e-07        | 0.01546               | 0         | Glycemic index (normal weight)    | ILMN_1716983 | LILRA2                                           | -1.0929  | 0.2450         | 1.31e-05 | ENST00000613573 |  |
| cg24147838                                                                                                                                                                                | LAI1R1                             | 801          | 0.1264           | 0.0256         | 8.00e-07        | 0.01546               | 0         | Glycemic index (normal weight)    | ILMN_1784884 | LILRB3                                           | -2.5298  | 0.5733         | 1.60e-05 | ENST00000445347 |  |
| cg24147838                                                                                                                                                                                | LAI1R1                             | 801          | 0.1264           | 0.0256         | 8.00e-07        | 0.01546               | 0         | Glycemic index (normal weight)    | ILMN_2357419 | LILRA5                                           | -0.2900  | 0.0710         | 6.23e-05 | ENST00000618711 |  |
| cg24147838                                                                                                                                                                                | LAI1R1                             | 801          | 0.1264           | 0.0256         | 8.00e-07        | 0.01546               | 0         | Glycemic index (normal weight)    | ILMN_1716983 | LILRA2                                           | -1.0929  | 0.2450         | 1.31e-05 | ENST00000621721 |  |
| cg24147838                                                                                                                                                                                | LAI1R1                             | 801          | 0.1264           | 0.0256         | 8.00e-07        | 0.01546               | 0         | Glycemic index (normal weight)    | ILMN_2357419 | LILRA5                                           | -0.2900  | 0.0710         | 6.23e-05 | ENST00000612621 |  |
| cg24147838                                                                                                                                                                                | LAI1R1                             | 801          | 0.1264           | 0.0256         | 8.00e-07        | 0.01546               | 0         | Glycemic index (normal weight)    | ILMN_1716983 | LILRA2                                           | -1.0929  | 0.2450         | 1.31e-05 | ENST00000620279 |  |
| cg24147838                                                                                                                                                                                | LAI1R1                             | 801          | 0.1264           | 0.0256         | 8.00e-07        | 0.01546               | 0         | Glycemic index (normal weight)    | ILMN_2357419 | LILRA5                                           | -0.2900  | 0.0710         | 6.23e-05 | ENST00000432233 |  |
| cg24147838                                                                                                                                                                                | LAI1R1                             | 801          | 0.1264           | 0.0256         | 8.00e-07        | 0.01546               | 0         | Glycemic index (normal weight)    | ILMN_2357419 | LILRA5                                           | -0.2900  | 0.0710         | 6.23e-05 | ENST00000620091 |  |
| cg24147838                                                                                                                                                                                | LAI1R1                             | 801          | 0.1264           | 0.0256         | 8.00e-07        | 0.01546               | 0         | Glycemic index (normal weight)    | ILMN_2357419 | LILRA5                                           | -0.2900  | 0.0710         | 6.23e-05 | ENST00000621042 |  |
| cg24147838                                                                                                                                                                                | LAI1R1                             | 801          | 0.1264           | 0.0256         | 8.00e-07        | 0.01546               | 0         | Glycemic index (normal weight)    | ILMN_1716983 | LILRA2                                           | -1.0929  | 0.2450         | 1.31e-05 | ENST00000251376 |  |
| cg02795334                                                                                                                                                                                |                                    | 801          | -0.2086          | 0.0423         | 8.39e-07        | 0.01557               | 87.5      | Glycemic index (normal weight)    | ILMN_2187746 | ENK2                                             | 1.9762   | 0.4540         | 2.06e-05 | ENST00000553456 |  |
| cg15645685                                                                                                                                                                                | PBX4                               | 386          | -0.1373          | 0.0283         | 1.23e-06        | 0.01764               | 0         | Glycemic index (overweight/obese) | ILMN_1805693 | GMIP                                             | 0.6179   | 0.1383         | 1.27e-05 | ENST00000203556 |  |
| cg06602723                                                                                                                                                                                | HOXB8                              | 209          | -0.0446          | 0.0096         | 4.05e-06        | 0.01868               | 53.9      | Glycemic load (overweight/obese)  | ILMN_1702125 | HOXB7                                            | 1.5859   | 0.1669         | 3.89e-18 | ENST00000239165 |  |
| cg06602723                                                                                                                                                                                | HOXB8                              | 209          | -0.0446          | 0.0096         | 4.05e-06        | 0.01868               | 53.9      | Glycemic load (overweight/obese)  | ILMN_1674908 | HOXB5                                            | 1.0450   | 0.2026         | 5.61e-07 | ENST00000239151 |  |
| cg06602723                                                                                                                                                                                | HOXB8                              | 209          | -0.0446          | 0.0096         | 4.05e-06        | 0.01868               | 53.9      | Glycemic load (overweight/obese)  | ILMN_1798496 | HOXB8                                            | 1.6374   | 0.1704         | 1.87e-18 | ENST00000239144 |  |
| cg27039257                                                                                                                                                                                | IGF2BP2                            | 219          | 0.3124           | 0.0644         | 1.25e-06        | 0.01984               | 85.9      | Glycemic index (normal weight)    | ILMN_1702447 | IGF2BP2                                          | -1.0885  | 0.2302         | 4.07e-06 | ENST00000382199 |  |
| cg27039257                                                                                                                                                                                | IGF2BP2                            | 219          | 0.3124           | 0.0644         | 1.25e-06        | 0.01984               | 85.9      | Glycemic index (normal weight)    | ILMN_2123567 | SENP2                                            | -0.7986  | 0.1979         | 7.55e-05 | ENST00000296257 |  |
| cg24363299                                                                                                                                                                                | BRD4                               | 219          | 0.2549           | 0.0528         | 1.38e-06        | 0.02036               | 0         | Glycemic index (normal weight)    | ILMN_1795089 | RASA13                                           | 3.8420   | 0.4665         | 1.61e-14 | ENST00000602011 |  |
| cg24363299                                                                                                                                                                                | BRD4                               | 219          | 0.2549           | 0.0528         | 1.38e-06        | 0.02036               | 0         | Glycemic index (normal weight)    | ILMN_3238803 | RASA13                                           | 0.8838   | 0.1923         | 7.29e-06 | ENST00000343625 |  |
| cg24363299                                                                                                                                                                                | BRD4                               | 219          | 0.2549           | 0.0528         | 1.38e-06        | 0.02036               | 0         | Glycemic index (normal weight)    | ILMN_1795089 | RASA13                                           | 3.8420   | 0.4665         | 1.61e-14 | ENST00000602024 |  |
| cg23889772                                                                                                                                                                                | COL5A3                             | 386          | -0.1412          | 0.0296         | 1.83e-06        | 0.02092               | 67.4      | Glycemic index (overweight/obese) | ILMN_1689446 | EIF3G                                            | 2.0051   | 0.5054         | 9.87e-05 | ENST00000251308 |  |
| cg23120601                                                                                                                                                                                | PLCB2                              | 383          | -0.0569          | 0.0119         | 1.96e-06        | 0.02095               | 63.5      | Glycemic index (overweight/obese) | ILMN_1743340 | CHST14                                           | -0.7716  | 0.1924         | 8.36e-05 | ENST00000306243 |  |
| cg23120601                                                                                                                                                                                | PLCB2                              | 383          | -0.0569          | 0.0119         | 1.96e-06        | 0.02095               | 63.5      | Glycemic index (overweight/obese) | ILMN_1730077 | RPSU2D                                           | -1.1592  | 0.2193         | 3.03e-07 | ENST00000315616 |  |
| cg23120601                                                                                                                                                                                | PLCB2                              | 383          | -0.0569          | 0.0119         | 1.96e-06        | 0.02095               | 63.5      | Glycemic index (overweight/obese) | ILMN_1724066 | PLCB2                                            | 1.1589   | 0.2567         | 1.04e-05 | ENST00000260402 |  |
| cg12732334                                                                                                                                                                                | EIF4G3                             | 170          | -0.0731          | 0.0143         | 3.28e-07        | 0.02250               | 84.4      | Glycemic load (normal weight)     | ILMN_1701603 | ALPL                                             | 4.5975   | 1.0370         | 1.46e-05 | ENST00000374840 |  |
| cg20965602                                                                                                                                                                                | LOC284395                          | 170          | -0.0201          | 0.0039         | 2.92e-07        | 0.02250               | 0         | Glycemic load (normal weight)     | ILMN_1703695 | C19orf12                                         | 1.5958   | 0.4018         | 9.70e-05 | ENST00000623113 |  |
| cg14820577                                                                                                                                                                                |                                    | 116          | 0.0309           | 0.0076         | 7.97e-06        | 0.02693               | 87.8      | Glycemic load (overweight/obese)  | ILMN_1755077 | HEBP2                                            | -2.0749  | 0.4596         | 1.03e-05 | ENST00000607197 |  |
| cg04126424                                                                                                                                                                                | EGF17                              | 219          | 0.3098           | 0.0655         | 2.25e-06        | 0.02709               | 40.9      | Glycemic index (normal weight)    | ILMN_1677484 | SNAPC4                                           | 1.1239   | 0.2557         | 1.72e-05 | ENST00000684778 |  |
| cg21462596                                                                                                                                                                                | PRTN3                              | 209          | 0.0447           | 0.0100         | 8.93e-06        | 0.02891               | 0         | Glycemic load (overweight/obese)  | ILMN_1674661 | CRBP                                             | -0.9700  | 0.2402         | 7.46e-05 | ENST00000320936 |  |
| cg14873515                                                                                                                                                                                | NDST1                              | 209          | 0.0297           | 0.0067         | 9.49e-06        | 0.03016               | 32.6      | Glycemic load (overweight/obese)  | ILMN_2338785 | RPS14                                            | 1.3139   | 0.2467         | 2.50e-07 | ENST00000401695 |  |
| cg14873515                                                                                                                                                                                | NDST1                              | 2            |                  |                |                 |                       |           |                                   |              |                                                  |          |                |          |                 |  |

**Table S18. Enrichments for genomic regulatory regions using LOLA CORE within significant CpGs (FDR <0.05) of the normal-weight or overweight/obese models**

| <b>Glycemic index - normal-weight model</b>    |              |           |                                         |                      |                                                    |
|------------------------------------------------|--------------|-----------|-----------------------------------------|----------------------|----------------------------------------------------|
| Collection                                     | Log(P-value) | oddsRatio | Cell Type                               | Antibody             | Axis label                                         |
| cistrome_epigenome                             | 16.06        | 7.3       | MR4 cells                               | H3K9me3              | cistrome_epigenome MR4 cells H3K9me3               |
| encode_tfbs                                    | 11.35        | 7.6       | K562                                    | Max                  | ChIP K562 Max                                      |
| cistrome_epigenome                             | 14.44        | 6.6       | MR4 cells                               | H3K9K14ac            | cistrome_epigenome MR4 cells H3K9K14ac             |
| cistrome_epigenome                             | 13.38        | 6.5       | NB4 cells                               | H3K9K14ac            | cistrome_epigenome NB4 cells H3K9K14ac             |
| encode_tfbs                                    | 10.24        | 9.4       | H1-hESC                                 | SP1                  | ChIP H1-hESC SP1                                   |
| encode_tfbs                                    | 10.03        | 7.1       | HeLa-S3                                 | Max                  | ChIP HeLa-S3 Max                                   |
| encode_segmentation                            | 10.38        | 6.5       | K562                                    |                      | Enhancers Segments                                 |
| encode_tfbs                                    | 9.24         | 7.5       | GM12878                                 | ELF1_(SC-631)        | ChIP GM12878 ELF1_(SC-631)                         |
| encode_tfbs                                    | 8.34         | 7.5       | PFSK-1                                  | FOXP2                | ChIP PFSK-1 FOXP2                                  |
| encode_tfbs                                    | 8.98         | 10.0      | HeLa-S3                                 | Mxi1_(AF4185)        | ChIP HeLa-S3 Mxi1_(AF4185)                         |
| encode_tfbs                                    | 7.48         | 6.4       | GM12878                                 | Pol2                 | ChIP GM12878 Pol2                                  |
| encode_tfbs                                    | 7.17         | 6.5       | K562                                    | USF-1                | ChIP K562 USF-1                                    |
| encode_tfbs                                    | 7.12         | 6.5       | GM12878                                 | TCF12                | ChIP GM12878 TCF12                                 |
| encode_tfbs                                    | 6.82         | 7.2       | GM15510                                 | Pol2                 | ChIP GM15510 Pol2                                  |
| encode_tfbs                                    | 6.79         | 7.1       | GM12878                                 | Egr-1                | ChIP GM12878 Egr-1                                 |
| encode_tfbs                                    | 6.99         | 8.3       | HepG2                                   | Max                  | ChIP HepG2 Max                                     |
| encode_tfbs                                    | 6.30         | 6.5       | H1-hESC                                 | TBP                  | ChIP H1-hESC TBP                                   |
| encode_tfbs                                    | 6.25         | 6.4       | HeLa-S3                                 | COREST_(sc-30189)    | ChIP HeLa-S3 COREST_(sc-30189)                     |
| codex                                          | 6.20         | 6.3       | Leukaemia cell                          | CBFB                 | U937 (histiocytic lymphoma) cell line conditionall |
| codex                                          | 5.86         | 6.4       | Acute Myeloid Leukemia                  | LMO2                 | Kasumi-1 (AML FAB M2) with t(8;21) translocation a |
| encode_tfbs                                    | 5.82         | 6.3       | SK-N-SH                                 | Sin3Ak-20            | ChIP SK-N-SH Sin3Ak-20                             |
| <b>Glycemic index - overweight/obese model</b> |              |           |                                         |                      |                                                    |
| Collection                                     | Log(P-value) | oddsRatio | Cell Type                               | Antibody             | Axis label                                         |
| ucsc_features                                  | 33.27        | 22.4      |                                         |                      | UCSC CpG islands                                   |
| encode_tfbs                                    | 24.08        | 22.1      | A549                                    | Pol2                 | ChIP A549 Pol2                                     |
| codex                                          | 19.90        | 20.3      | Embryonic Stem Cell                     | KDM4A                | K562 erythrocytic leukaemia cells (ATCC CCL-243) w |
| encode_tfbs                                    | 20.27        | 19.3      | A549                                    | Pol2                 | ChIP A549 Pol2                                     |
| encode_tfbs                                    | 18.39        | 20.7      | H1-hESC                                 | TAF1                 | ChIP H1-hESC TAF1                                  |
| encode_tfbs                                    | 17.58        | 23.3      | HepG2                                   | TAF1                 | ChIP HepG2 TAF1                                    |
| encode_tfbs                                    | 17.44        | 20.4      | MCF10A-Er-Src                           | Pol2                 | ChIP MCF10A-Er-Src Pol2                            |
| encode_tfbs                                    | 16.43        | 22.4      | ProgFib                                 | Pol2                 | ChIP ProgFib Pol2                                  |
| codex                                          | 16.67        | 20.6      | Embryonic Stem Cell                     | POLR2A               | codex Embryonic Stem Cell POLR2A                   |
| encode_tfbs                                    | 16.80        | 18.8      | HeLa-S3                                 | Pol2                 | ChIP HeLa-S3 Pol2                                  |
| codex                                          | 15.98        | 21.1      | Embryonic Stem Cell                     | POLR2A               | codex Embryonic Stem Cell POLR2A                   |
| encode_tfbs                                    | 16.99        | 17.4      | HepG2                                   | Pol2                 | ChIP HepG2 Pol2                                    |
| encode_tfbs                                    | 15.54        | 19.8      | MCF-7                                   | Pol2                 | ChIP MCF-7 Pol2                                    |
| encode_tfbs                                    | 15.69        | 18.0      | K562                                    | PHF8_(A301-772A)     | ChIP K562 PHF8_(A301-772A)                         |
| encode_tfbs                                    | 15.11        | 21.1      | A549                                    | Pol2                 | ChIP A549 Pol2                                     |
| encode_tfbs                                    | 14.80        | 20.1      | A549                                    | CREB1_(SC-240)       | ChIP A549 CREB1_(SC-240)                           |
| codex                                          | 14.40        | 21.6      | Embryonic Stem Cell                     | POLR2A               | codex Embryonic Stem Cell POLR2A                   |
| codex                                          | 13.88        | 19.9      | Embryonic Stem Cell                     | PHF8                 | K562 erythrocytic leukaemia cells (ATCC CCL-243) w |
| encode_tfbs                                    | 13.74        | 19.4      | Gliobla                                 | Pol2                 | ChIP Gliobla Pol2                                  |
| encode_tfbs                                    | 13.68        | 19.2      | NB4                                     | Pol2                 | ChIP NB4 Pol2                                      |
| <b>Glycemic load - normal-weight model</b>     |              |           |                                         |                      |                                                    |
| Collection                                     | Log(P-value) | oddsRatio | Cell Type                               | Antibody             | Axis label                                         |
| encode_segmentation                            | 4.97         | 36.4      | HeLa-S3                                 |                      | Promoter Flank Segments                            |
| encode_segmentation                            | 5.30         | 26.2      | H1hesc                                  |                      | TSS Segments                                       |
| codex                                          | 4.04         | 41.1      | Hematopoietic Stem and Progenitor Cells | FLI1                 | Mobilised CD34+ cells isolated from the healthy p  |
| encode_tfbs                                    | 4.37         | 25.5      | SK-N-SH                                 | Pol2-4H8             | ChIP SK-N-SH Pol2-4H8                              |
| encode_segmentation                            | 4.81         | 20.6      | GM12878                                 |                      | TSS Segments                                       |
| encode_segmentation                            | 4.31         | 24.6      | Huvec                                   |                      | TSS Segments                                       |
| encode_tfbs                                    | 3.89         | 36.3      | GM12878                                 | Max                  | ChIP GM12878 Max                                   |
| encode_tfbs                                    | 3.80         | 34.0      | GM12878                                 | BHLHE40_(NB100-1800) | ChIP GM12878 BHLHE40_(NB100-1800)                  |
| encode_segmentation                            | 4.19         | 22.9      | H1hesc                                  |                      | Promoter Flank Segments                            |

|                                               |              |           |                                         |                      |                                                    |
|-----------------------------------------------|--------------|-----------|-----------------------------------------|----------------------|----------------------------------------------------|
| cistrome_epigenome                            | 4.56         | 18.2      | VCaP                                    | H3K4me3              | cistrome_epigenome VCaP H3K4me3                    |
| encode_tfbs                                   | 3.67         | 30.6      | SK-N-SH                                 | Sin3Ak-20            | ChIP SK-N-SH Sin3Ak-20                             |
| cistrome_epigenome                            | 4.55         | 18.2      | CS58.LnCaP                              | H3K4me3              | cistrome_epigenome CS58.LnCaP H3K4me3              |
| cistrome_epigenome                            | 3.97         | 20.0      | LnCaP                                   | H3K4me3              | cistrome_epigenome LnCaP H3K4me3                   |
| encode_tfbs                                   | 3.40         | 24.8      | GM12878                                 | PAX5-N19             | ChIP GM12878 PAX5-N19                              |
| codex                                         | 3.40         | 24.6      | Acute Myeloid Leukemia                  | RUNX1                | Kasumi-1 (AML FAB M2) with t(8;21) translocation a |
| cistrome_cistrome                             | 3.86         | 18.7      | NB4 cells                               | PolII                | cistrome_cistrome NB4 cells PolII                  |
| cistrome_cistrome                             | 3.78         | 17.8      | lymphoblastoid(GM10855)                 | VDR                  | cistrome_cistrome lymphoblastoid(GM10855) VDR      |
| encode_tfbs                                   | 3.25         | 21.8      | U87                                     | Pol2-4H8             | ChIP U87 Pol2-4H8                                  |
| encode_tfbs                                   | 2.93         | 44.8      | K562                                    | COREST_(ab24166)     | ChIP K562 COREST_(ab24166)                         |
| encode_tfbs                                   | 2.90         | 43.4      | GM12878                                 | CHD1_(A301-218A)     | ChIP GM12878 CHD1_(A301-218A)                      |
| codex                                         | 3.07         | 19.0      | B-Cells                                 | BCL6                 | Cell line: Germinal center B cells. Chip antibody: |
| codex                                         | 2.78         | 37.6      | Acute Myeloid Leukemia                  | CEBPA                | Kasumi-1 (AML FAB M2) with t(8;21) translocation a |
| encode_tfbs                                   | 3.00         | 17.9      | HCT-116                                 | Pol2-4H8             | ChIP HCT-116 Pol2-4H8                              |
| cistrome_cistrome                             | 2.95         | 17.1      | A594 cells                              | NR3C1                | cistrome_cistrome A594 cells NR3C1                 |
| encode_segmentation                           | 2.59         | 29.9      | Huvec                                   |                      | Promoter Flank Segments                            |
| codex                                         | 2.55         | 28.7      | Leukaemia cell                          | ELF1                 | Acute myelomonocytic leukaemia cell line carrying  |
| codex                                         | 2.54         | 28.3      | Hematopoietic Stem and Progenitor Cells | TCF7L2               | Mobilised CD34+ cells isolated from the healthy p  |
| encode_tfbs                                   | 2.46         | 25.8      | H1-hESC                                 | Bach1_(sc-14700)     | ChIP H1-hESC Bach1_(sc-14700)                      |
| encode_tfbs                                   | 2.45         | 25.5      | HepG2                                   | Max                  | ChIP HepG2 Max                                     |
| encode_tfbs                                   | 2.41         | 24.3      | HeLa-S3                                 | Mxi1_(AF4185)        | ChIP HeLa-S3 Mxi1_(AF4185)                         |
| encode_tfbs                                   | 2.40         | 23.9      | HepG2                                   | MAZ_(ab85725)        | ChIP HepG2 MAZ_(ab85725)                           |
| encode_tfbs                                   | 2.39         | 23.6      | HeLa-S3                                 | Pol2(phosphoS2)      | ChIP HeLa-S3 Pol2(phosphoS2)                       |
| encode_tfbs                                   | 2.38         | 23.3      | HepG2                                   | NRSF                 | ChIP HepG2 NRSF                                    |
| codex                                         | 2.36         | 22.8      | Leukemia cell                           | POLR2A               | Jurkat T-ALL cell line treated with DMSO/vehicle f |
| encode_tfbs                                   | 2.33         | 21.9      | K562                                    | UBTF_(SAB1404509)    | ChIP K562 UBTF_(SAB1404509)                        |
| codex                                         | 2.30         | 21.2      | Acute Myeloid Leukemia                  | RUNX1                | Kasumi-1 (AML FAB M2) with t(8;21) translocation a |
| encode_tfbs                                   | 2.28         | 20.9      | HepG2                                   | BHLHE40_(NB100-1800) | ChIP HepG2 BHLHE40_(NB100-1800)                    |
| encode_tfbs                                   | 2.28         | 20.7      | GM12878                                 | Egr-1                | ChIP GM12878 Egr-1                                 |
| encode_tfbs                                   | 2.26         | 20.3      | K562                                    | Pol2                 | ChIP K562 Pol2                                     |
| cistrome_cistrome                             | 2.25         | 20.1      | HepG2 liver cells                       | FoxA2                | cistrome_cistrome HepG2 liver cells FoxA2          |
| encode_tfbs                                   | 2.25         | 20.0      | HepG2                                   | TAF1                 | ChIP HepG2 TAF1                                    |
| encode_tfbs                                   | 2.23         | 19.5      | HepG2                                   | Pol2                 | ChIP HepG2 Pol2                                    |
| encode_tfbs                                   | 2.19         | 18.7      | HepG2                                   | Sin3Ak-20            | ChIP HepG2 Sin3Ak-20                               |
| encode_tfbs                                   | 2.18         | 18.3      | A549                                    | GR                   | ChIP A549 GR                                       |
| encode_tfbs                                   | 2.15         | 17.7      | HepG2                                   | ELF1_(SC-631)        | ChIP HepG2 ELF1_(SC-631)                           |
| <b>Glycemic load - overweight/obese model</b> |              |           |                                         |                      |                                                    |
| Collection                                    | Log(P-value) | oddsRatio | Cell Type                               | Antibody             | Axis label                                         |
| ucsc_features                                 | 59.30        | 18.7      |                                         |                      | UCSC CpG islands                                   |
| ucsc_features                                 | 75.93        | 14.9      |                                         |                      | UCSC Evo CpG islands                               |
| cistrome_cistrome                             | 34.65        | 14.6      | HepG2 liver cells                       | GABP                 | cistrome_cistrome HepG2 liver cells GABP           |
| codex                                         | 29.53        | 15.1      | Embryonic Stem Cell                     | KDM4A                | K562 erythrocytic leukaemia cells (ATCC CCL-243) w |
| codex                                         | 27.35        | 15.1      | Leukaemia cell                          | CBFB                 | Acute myelomonocytic leukaemia cell line carrying  |
| encode_tfbs                                   | 22.24        | 11.4      | A549                                    | Pol2                 | ChIP A549 Pol2                                     |
| codex                                         | 21.28        | 13.1      | Erythrocytic leukaemia cells            | PHF8                 | K562 erythrocytic leukaemia cells (ATCC CCL-243) w |
| codex                                         | 21.25        | 11.6      | Erythrocytic leukaemia cells            | KDM5B                | K562 erythrocytic leukaemia cells (ATCC CCL-243) w |
| encode_tfbs                                   | 20.94        | 12.7      | H1-hESC                                 | TAF1                 | ChIP H1-hESC TAF1                                  |
| codex                                         | 19.51        | 18.4      | Leukaemia cell                          | MYH11                | Acute myelomonocytic leukaemia cell line carrying  |
| encode_tfbs                                   | 17.04        | 12.9      | ProgFib                                 | Pol2                 | ChIP ProgFib Pol2                                  |
| encode_tfbs                                   | 17.08        | 11.3      | MCF10A-Er-Src                           | Pol2                 | ChIP MCF10A-Er-Src Pol2                            |
| cistrome_cistrome                             | 15.71        | 12.0      | HepG2 liver cells                       | FoxA2                | cistrome_cistrome HepG2 liver cells FoxA2          |
| codex                                         | 15.65        | 11.1      | Embryonic Stem Cell                     | POLR2A               | codex Embryonic Stem Cell POLR2A                   |
| encode_tfbs                                   | 15.48        | 10.9      | IMR90                                   | Pol2                 | ChIP IMR90 Pol2                                    |
| codex                                         | 15.01        | 11.9      | Embryonic Stem Cell                     | PHF8                 | K562 erythrocytic leukaemia cells (ATCC CCL-243) w |
| encode_tfbs                                   | 14.72        | 11.5      | K562                                    | PLU1                 | ChIP K562 PLU1                                     |
| encode_tfbs                                   | 13.84        | 11.2      | MCF-7                                   | Pol2                 | ChIP MCF-7 Pol2                                    |
| encode_tfbs                                   | 13.81        | 11.2      | A549                                    | Pol2                 | ChIP A549 Pol2                                     |
| encode_tfbs                                   | 13.74        | 11.1      | Gliobla                                 | Pol2                 | ChIP Gliobla Pol2                                  |
