# Supplementary material
Source: publisher figshare collection journal article supplement (https://diabetesjournals.figshare.com/articles/dataset/_/24061539)
Supplement: Supplementary file 2 [file 1]

## Supplementary information

### Epigenome-wide Meta-Analysis Reveals Associations between Dietary Glycemic Index and Glycemic Load and DNA methylation in Children and Adolescents with Different Body Size

Raffael Ott et al.

#### Contents

|                                                                                                                                                                            |           |
|----------------------------------------------------------------------------------------------------------------------------------------------------------------------------|-----------|
| <b>SUPPLEMENTAL TABLES.....</b>                                                                                                                                            | <b>3</b>  |
| TABLE S1. INDIVIDUAL COHORT OVERVIEW OF ARRAY PREPROCESSING AND NORMALIZATION STEPS.....                                                                                   | 3         |
| TABLE S2. INDIVIDUAL COHORT POST-BACON-CORRECTED MODEL ESTIMATES .....                                                                                                     | 4         |
| TABLE S3. GENOMIC INFLATION FACTOR ( $\lambda$ ) AND BIAS ( $\mu$ ) OF THE META-ANALYSIS MODELS .....                                                                      | 5         |
| <b>SUPPLEMENTAL FIGURES .....</b>                                                                                                                                          | <b>6</b>  |
| SUPPLEMENTAL FIGURE S1: QQ-PLOTS OF COCHRAN'S HETEROGENEITY TEST P-VALUES DERIVED FROM THE FULL GROUP META-ANALYSES WITH GLYCEMIC LOAD AND DIFFERENT INCLUDED COHORTS..... | 6         |
| SUPPLEMENTAL FIGURE S2: QQ-PLOTS OF COCHRAN'S HETEROGENEITY TEST P-VALUES DERIVED FROM META-ANALYSES BEFORE AND AFTER THE INCLUSION OF THE NFBC1986 COHORT .....           | 7         |
| SUPPLEMENTAL FIGURE S3: FOREST PLOTS OF THE PROBES WITH HIGHEST $I^2$ -VALUE (FIRST 12 CpGs) OF THE GLYCEMIC INDEX NORMAL WEIGHT META-ANALYSIS .....                       | 8         |
| SUPPLEMENTAL FIGURE S4: FOREST PLOTS OF THE PROBES WITH HIGHEST $I^2$ -VALUE (FIRST 12 CpGs) OF THE GLYCEMIC LOAD NORMAL WEIGHT META-ANALYSIS .....                        | 9         |
| SUPPLEMENTAL FIGURE S5: FOREST PLOTS OF THE PROBES WITH HIGHEST $I^2$ -VALUE (FIRST 12 CpGs) OF THE GLYCEMIC INDEX OVERWEIGHT/OBESITY META-ANALYSIS.....                   | 10        |
| SUPPLEMENTAL FIGURE S6: FOREST PLOTS OF THE PROBES WITH HIGHEST $I^2$ -VALUE (FIRST 12 CpGs) OF THE GLYCEMIC LOAD OVERWEIGHT/OBESITY META-ANALYSIS.....                    | 11        |
| SUPPLEMENTAL FIGURE S7: LEAVE STUDY OUT PLOTS OF THE PROBES WITH HIGHEST $I^2$ -VALUE (FIRST 12 CpGs) OF THE GLYCEMIC INDEX NORMAL WEIGHT META-ANALYSIS.....               | 12        |
| SUPPLEMENTAL FIGURE S8: LEAVE STUDY OUT PLOTS OF THE PROBES WITH HIGHEST $I^2$ -VALUE (FIRST 12 CpGs) OF THE GLYCEMIC LOAD NORMAL WEIGHT META-ANALYSIS.....                | 13        |
| SUPPLEMENTAL FIGURE S9: LEAVE STUDY OUT PLOTS OF THE PROBES WITH HIGHEST $I^2$ -VALUE (FIRST 12 CpGs) OF THE GLYCEMIC INDEX OVERWEIGHT/OBESE META-ANALYSIS.....            | 14        |
| SUPPLEMENTAL FIGURE S10: LEAVE STUDY OUT PLOTS OF THE PROBES WITH HIGHEST $I^2$ -VALUE (FIRST 12 CpGs) OF THE GLYCEMIC LOAD OVERWEIGHT/OBESE META-ANALYSIS.....            | 15        |
| <b>ADDITIONAL COHORT INFORMATION.....</b>                                                                                                                                  | <b>16</b> |
| INMA.....                                                                                                                                                                  | 16        |
| TEENDIAB.....                                                                                                                                                              | 16        |
| ATHEROBESITY .....                                                                                                                                                         | 16        |
| LIFE CHILD .....                                                                                                                                                           | 16        |
| NFBC1986 .....                                                                                                                                                             | 17        |
| RAINE STUDY GEN2.....                                                                                                                                                      | 17        |
| <b>ADDITIONAL COHORT INFORMATION ON COVARIABLES.....</b>                                                                                                                   | <b>17</b> |
| INMA.....                                                                                                                                                                  | 17        |
| TEENDIAB.....                                                                                                                                                              | 17        |
| ATHEROBESITY .....                                                                                                                                                         | 18        |
| LIFE CHILD .....                                                                                                                                                           | 18        |
| NFBC1986 .....                                                                                                                                                             | 18        |

|                                                                                           |           |
|-------------------------------------------------------------------------------------------|-----------|
| RAINE STUDY GEN2.....                                                                     | 18        |
| <u>ADDITIONAL COHORT INFORMATION ON DIETARY ASSESSMENT .....</u>                          | <u>18</u> |
| INMA.....                                                                                 | 18        |
| TEENDIAB.....                                                                             | 18        |
| ATHEROBESITY .....                                                                        | 19        |
| LIFE CHILD .....                                                                          | 19        |
| NFBC1986 .....                                                                            | 19        |
| RAINE STUDY GEN2.....                                                                     | 19        |
| <u>ADDITIONAL COHORT INFORMATION ON DNA METHYLATION ANALYSES .....</u>                    | <u>19</u> |
| INMA.....                                                                                 | 19        |
| TEENDIAB.....                                                                             | 20        |
| ATHEROBESITY .....                                                                        | 20        |
| LIFE CHILD .....                                                                          | 20        |
| NFBC1986 .....                                                                            | 20        |
| RAINE STUDY GEN2.....                                                                     | 21        |
| <u>MATERIAL AND METHODS – MENDELIAN RANDOMIZATION (TWO-SAMPLE) ANALYSIS .....</u>         | <u>21</u> |
| <u>MATERIAL AND METHODS – EQTM ANALYSES LEIPZIG CHILDHOOD ADIPOSE TISSUE COHORT .....</u> | <u>21</u> |
| <u>ACKNOWLEDGEMENTS .....</u>                                                             | <u>22</u> |
| INMA.....                                                                                 | 22        |
| TEENDIAB.....                                                                             | 22        |
| ATHEROBESITY .....                                                                        | 22        |
| LIFE CHILD .....                                                                          | 22        |
| NFBC1986 .....                                                                            | 22        |
| RAINE STUDY GEN2.....                                                                     | 22        |
| <u>FUNDING.....</u>                                                                       | <u>22</u> |
| INMA.....                                                                                 | 23        |
| TEENDIAB.....                                                                             | 23        |
| ATHEROBESITY .....                                                                        | 23        |
| LIFE CHILD .....                                                                          | 23        |
| NFBC1986 .....                                                                            | 23        |
| RAINE STUDY GEN2.....                                                                     | 23        |
| THE LEIPZIG CHILDHOOD ADIPOSE TISSUE COHORT .....                                         | 23        |
| LEANNE K. KÜPERS .....                                                                    | 24        |
| ELMAR W. TOBL.....                                                                        | 24        |
| CRISTINA CAMPOY .....                                                                     | 24        |
| <u>REFERENCES OF THE SUPPLEMENTAL INFORMATION .....</u>                                   | <u>24</u> |

## Supplemental Tables

Table S1. Individual cohort overview of array preprocessing and normalization steps

| <b>Cohort</b>    | <b>Illumina array type</b> | <b>Preprocessing R package</b> | <b>Filter threshold for sub-optimal probes (p-value threshold)</b> | <b>Normalization method</b>    | <b>Additional batch adjustment</b> | <b>N autosomal probes</b> |
|------------------|----------------------------|--------------------------------|--------------------------------------------------------------------|--------------------------------|------------------------------------|---------------------------|
| ATHEROBESITY     | EPIC                       | Champ                          | 0.01                                                               | Beta mixture quantile dilation | ComBat                             | 665623                    |
| INMA             | 450K                       | Minfi                          | 10E-16                                                             | Functional normalization       | ComBat                             | 368485                    |
| LIFE Child       | EPIC                       | Champ                          | 0.01                                                               | Beta mixture quantile dilation | ComBat                             | 665623                    |
| NFBC1986         | 450K                       | Minfi                          | 10E-16                                                             | Functional normalization       | -                                  | 369518                    |
| Raine Study Gen2 | 450K                       | MethylAid                      | 0.05                                                               | Beta mixture quantile dilation | -                                  | 367786                    |
| TEENDIAB         | EPIC                       | Minfi                          | 0.01                                                               | Quantile normalization         | ComBat                             | 651659                    |

Table S2. Individual cohort post-bacon-corrected model estimates

| Cohort                            | “classical $\lambda$ ” | $\lambda$ | $\mu$  | Post-bacon median SE |
|-----------------------------------|------------------------|-----------|--------|----------------------|
| Glycemic index (whole group)      |                        |           |        |                      |
| INMA                              | 1.01                   | 1.00      | -0.002 | 3.84E-04             |
| TEENDIAB                          | 1.02                   | 1.01      | -0.001 | 1.63E-04             |
| LIFE Child                        | 1.00                   | 1.00      | 0.001  | 4.02E-04             |
| ATHEROBESITY                      | 1.02                   | 1.00      | -0.003 | 3.82E-04             |
| Raine Study Gen2                  | 1.30                   | 1.00      | 0.000  | 2.86E-04             |
| NFBC1986                          | 1.14                   | 1.00      | 0.000  | 2.25E-04             |
| Glycemic load (whole group)       |                        |           |        |                      |
| INMA                              | 0.89                   | 0.99      | 0.005  | 7.03E-05             |
| TEENDIAB                          | 1.02                   | 1.00      | 0.001  | 1.94E-05             |
| LIFE Child                        | 1.02                   | 1.01      | -0.000 | 6.54E-05             |
| ATHEROBESITY                      | 1.49                   | 1.16      | -0.156 | 9.01E-05             |
| Raine Study Gen2                  | 3.24                   | 0.98      | -0.039 | 3.22E-05             |
| NFBC1986                          | 0.96                   | 0.98      | 0.018  | 2.33E-05             |
| Glycemic index (normal-weight)    |                        |           |        |                      |
| INMA                              | 1.03                   | 1.00      | -0.002 | 4.22E-04             |
| TEENDIAB                          | 1.02                   | 1.00      | -0.001 | 1.91E-04             |
| LIFE Child                        | 1.09                   | 1.00      | 0.001  | 7.40E-04             |
| ATHEROBESITY                      | 1.06                   | 1.01      | -0.003 | 6.22E-04             |
| Raine Study Gen2                  | 3.28                   | 0.98      | -0.071 | 2.80E-04             |
| NFBC1986                          | 1.12                   | 1.00      | -0.000 | 2.45E-04             |
| Glycemic index (overweight/obese) |                        |           |        |                      |
| INMA                              | 1.10                   | 1.01      | -0.002 | 7.52E-04             |
| TEENDIAB                          | 1.05                   | 1.01      | 0.001  | 3.25E-04             |
| LIFE Child                        | 1.03                   | 1.01      | 0.001  | 4.91E-04             |
| ATHEROBESITY                      | 1.05                   | 1.02      | -0.004 | 5.46E-04             |
| Raine Study Gen2                  | 1.05                   | 0.99      | 0.004  | 3.20E-04             |
| NFBC1986                          | 1.10                   | 0.99      | -0.002 | 3.95E-04             |
| Glycemic load (normal-weight)     |                        |           |        |                      |
| INMA                              | 0.89                   | 1.00      | -0.001 | 7.42E-05             |
| TEENDIAB                          | 1.01                   | 1.00      | -0.000 | 2.13E-05             |
| LIFE Child                        | 1.13                   | 1.03      | -0.020 | 1.61E-04             |
| ATHEROBESITY                      | 1.12                   | 1.02      | -0.013 | 1.48E-04             |
| Raine Study Gen2                  | 3.00                   | 0.98      | -0.036 | 4.10E-05             |
| NFBC1986                          | 1.00                   | 1.00      | 0.003  | 2.99E-05             |
| Glycemic load (overweight/obese)  |                        |           |        |                      |
| INMA                              | 1.07                   | 1.01      | -0.011 | 1.98E-04             |
| TEENDIAB                          | 1.05                   | 1.01      | 0.005  | 5.60E-05             |
| LIFE Child                        | 1.03                   | 1.01      | 0.001  | 6.82E-05             |
| ATHEROBESITY                      | 1.07                   | 1.02      | 0.008  | 1.44E-04             |
| Raine Study Gen2                  | 1.07                   | 1.00      | 0.001  | 5.31E-05             |
| NFBC1986                          | 1.07                   | 1.00      | 0.005  | 5.27E-05             |

Classical genomic inflation factor ( $\lambda$ ) obtained from *QCEWAS* R package. Inflation/deflation ( $\lambda$ ) and bias ( $\mu$ ) obtained from *bacon* R package. Median of all standard errors (SE) obtained from *QCEWAS* R package.

Table S3. Genomic inflation factor ( $\lambda$ ) and bias ( $\mu$ ) of the meta-analysis models

| Meta-analysis model             | Total n | Genomic inflation factor ( $\lambda$ )* | Bias ( $\mu$ )* |
|---------------------------------|---------|-----------------------------------------|-----------------|
| Glycemic index                  | 1187    | 0.99                                    | 0.001           |
| Glycemic load                   | 693     | 1.00                                    | -0.000          |
| Glycemic index normal-weight    | 801     | 1.00                                    | 0.001           |
| Glycemic index overweight/obese | 386     | 1.01                                    | -0.000          |
| Glycemic load normal-weight     | 481     | 1.00                                    | 0.000           |
| Glycemic load overweight/obese  | 209     | 1.00                                    | -0.000          |

\*Genomic inflation factor ( $\lambda$ ) and bias ( $\mu$ ) obtained from *bacon* R package.

**Supplemental tables S4-S18 are included in a separate excel file.**

## Supplemental Figures

Supplemental Figure S1: QQ-plots of Cochran's heterogeneity test p-values derived from the full group meta-analyses with glycemic load and different included cohorts

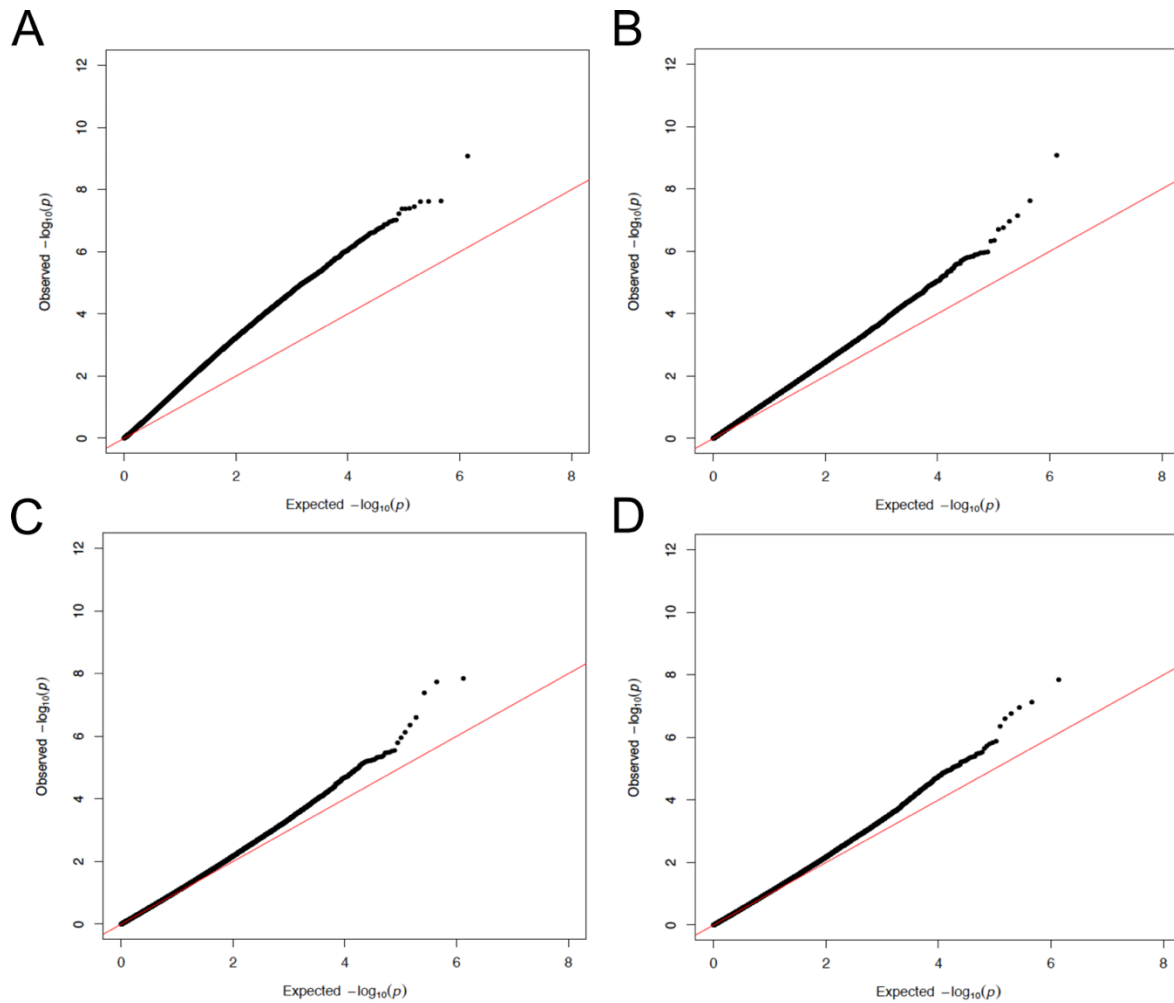

**Figure S1.** QQ-plots of Cochran's heterogeneity test p-values derived from the full group meta-analyses with glycemic load and different included cohorts. Overall heterogeneity of meta-analyses models was checked by evaluating the QQ-plots of Cochran's heterogeneity test p-values. Including all studies, i.e., INMA, TEENDIAB, LIFE Child, ATHEROBESITY and Raine, except NFBC1986 showed high heterogeneity (A;  $\lambda=2.03$ ). Heterogeneity decreased much after exclusion of Raine, i.e. keeping INMA, TEENDIAB, LIFE Child, ATHEROBESITY, (B;  $\lambda=1.40$ ) and decreased further after exclusion of ATHEROBESITY (C;  $\lambda=1.05$ ). Addition of NFBC1986 to the cohorts used in C, did not introduce heterogeneity (D;  $\lambda=1.05$ ). The final models for glycemic load thus included INMA, TEENDIAB, LIFE and NFBC1986 (D).

Supplemental Figure S2: QQ-plots of Cochran's heterogeneity test p-values derived from meta-analyses before and after the inclusion of the NFBC1986 cohort

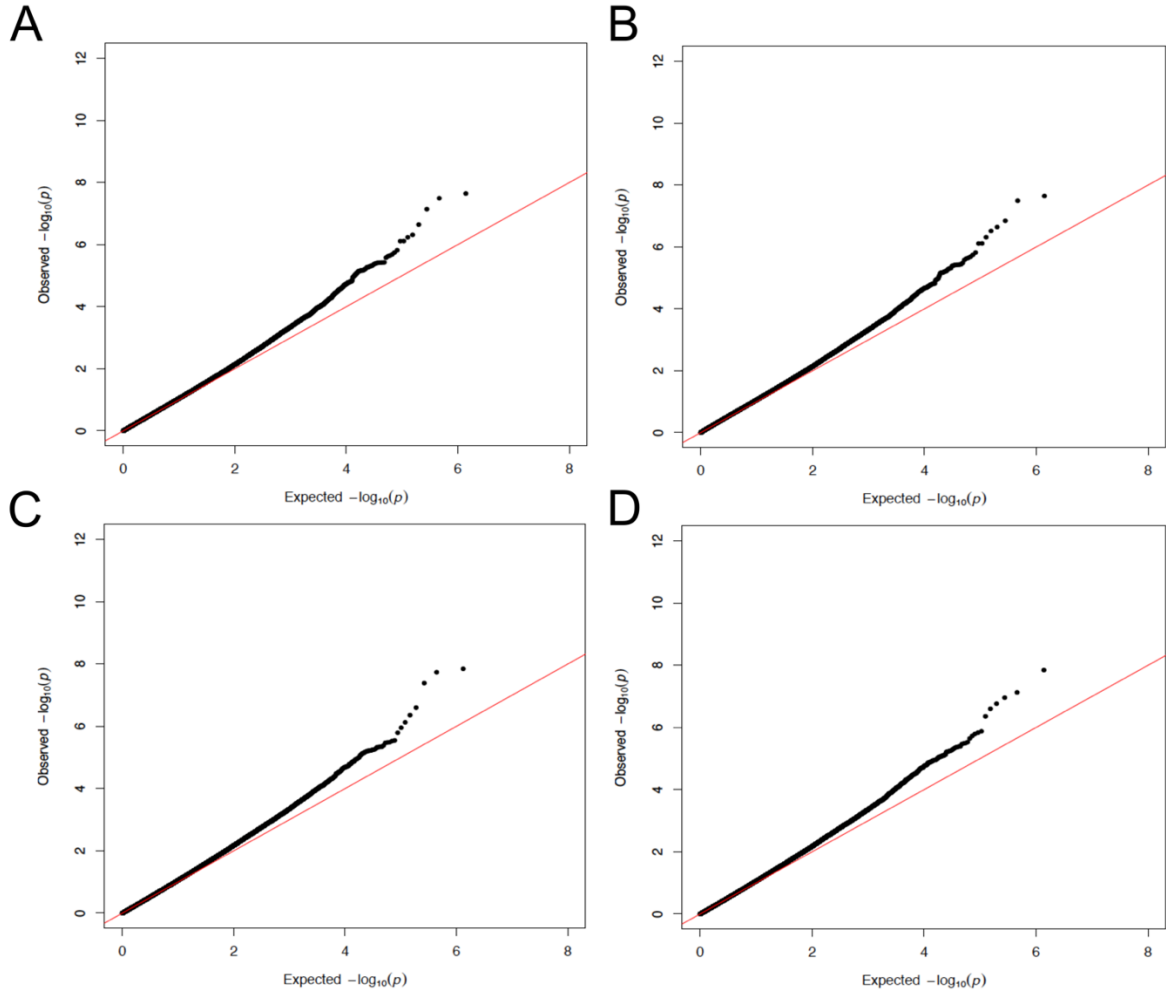

**Figure S2.** QQ-plots of Cochran's heterogeneity test p-values derived from the full group meta-analyses with glycemic index or glycemic load without or with NFBC1986. To evaluate if the addition of NFBC introduced heterogeneity to the meta-analysis models, QQ-plots were checked before and after the inclusion of NFBC to glycemic index analysis (A: without NFBC1986  $\lambda=1.09$ , B: with NFBC1986  $\lambda=1.12$ ) and glycemic load analysis (C: without NFBC1986  $\lambda=1.05$ , D: with NFBC1986  $\lambda=1.05$ ). As the inclusion of NFBC1986 did not introduce heterogeneity, we included it in the final models.

## Supplemental Figure S3: Forest plots of the probes with highest $I^2$ -value (first 12 CpGs) of the glycemic index normal weight meta-analysis

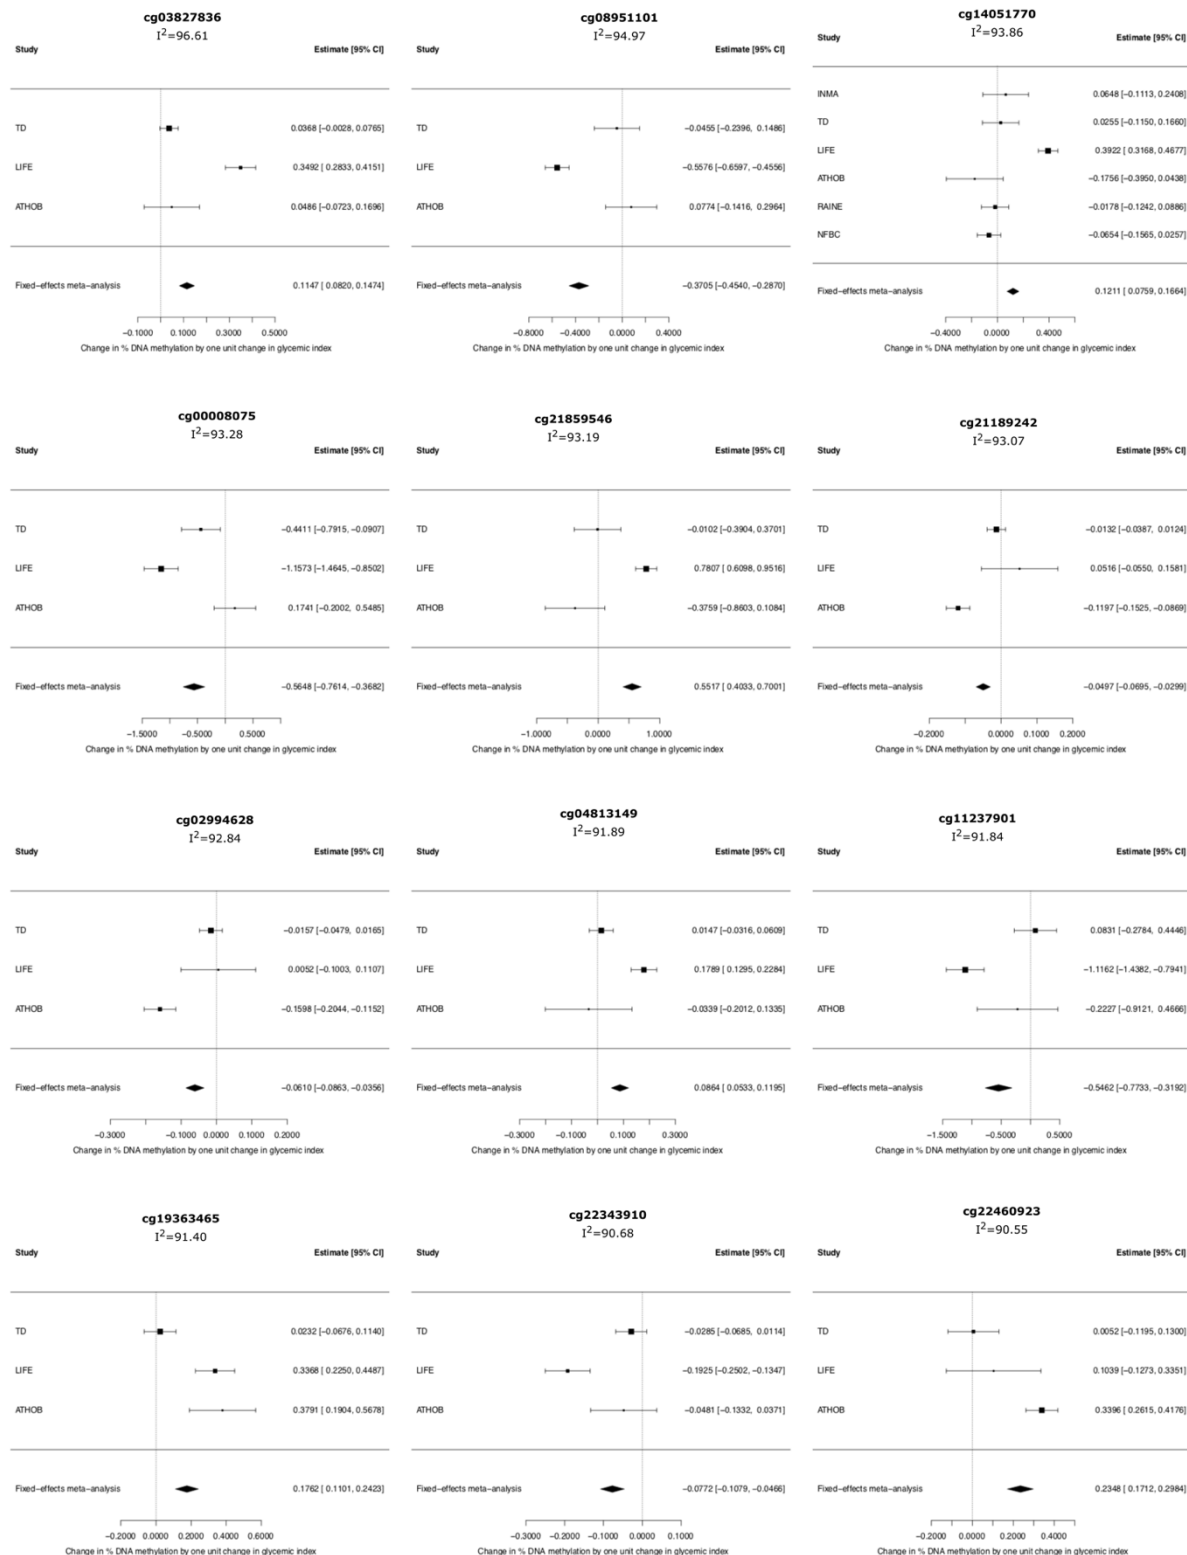

**Figure S3.** Forest plots of the meta-analysis results with highest heterogeneity based on  $I^2$ -value of the glycemic index normal weight model. Shown are the 12 most heterogenous probes. Cohort abbreviations: TD, Teendiab; LIFE, Life Child; ATHOB, Atherobesity; RAINE, the Raine study, NFBC, NFBC1986.



## Supplemental Figure S4: Forest plots of the probes with highest $I^2$ -value (first 12 CpGs) of the glycemic load normal weight meta-analysis

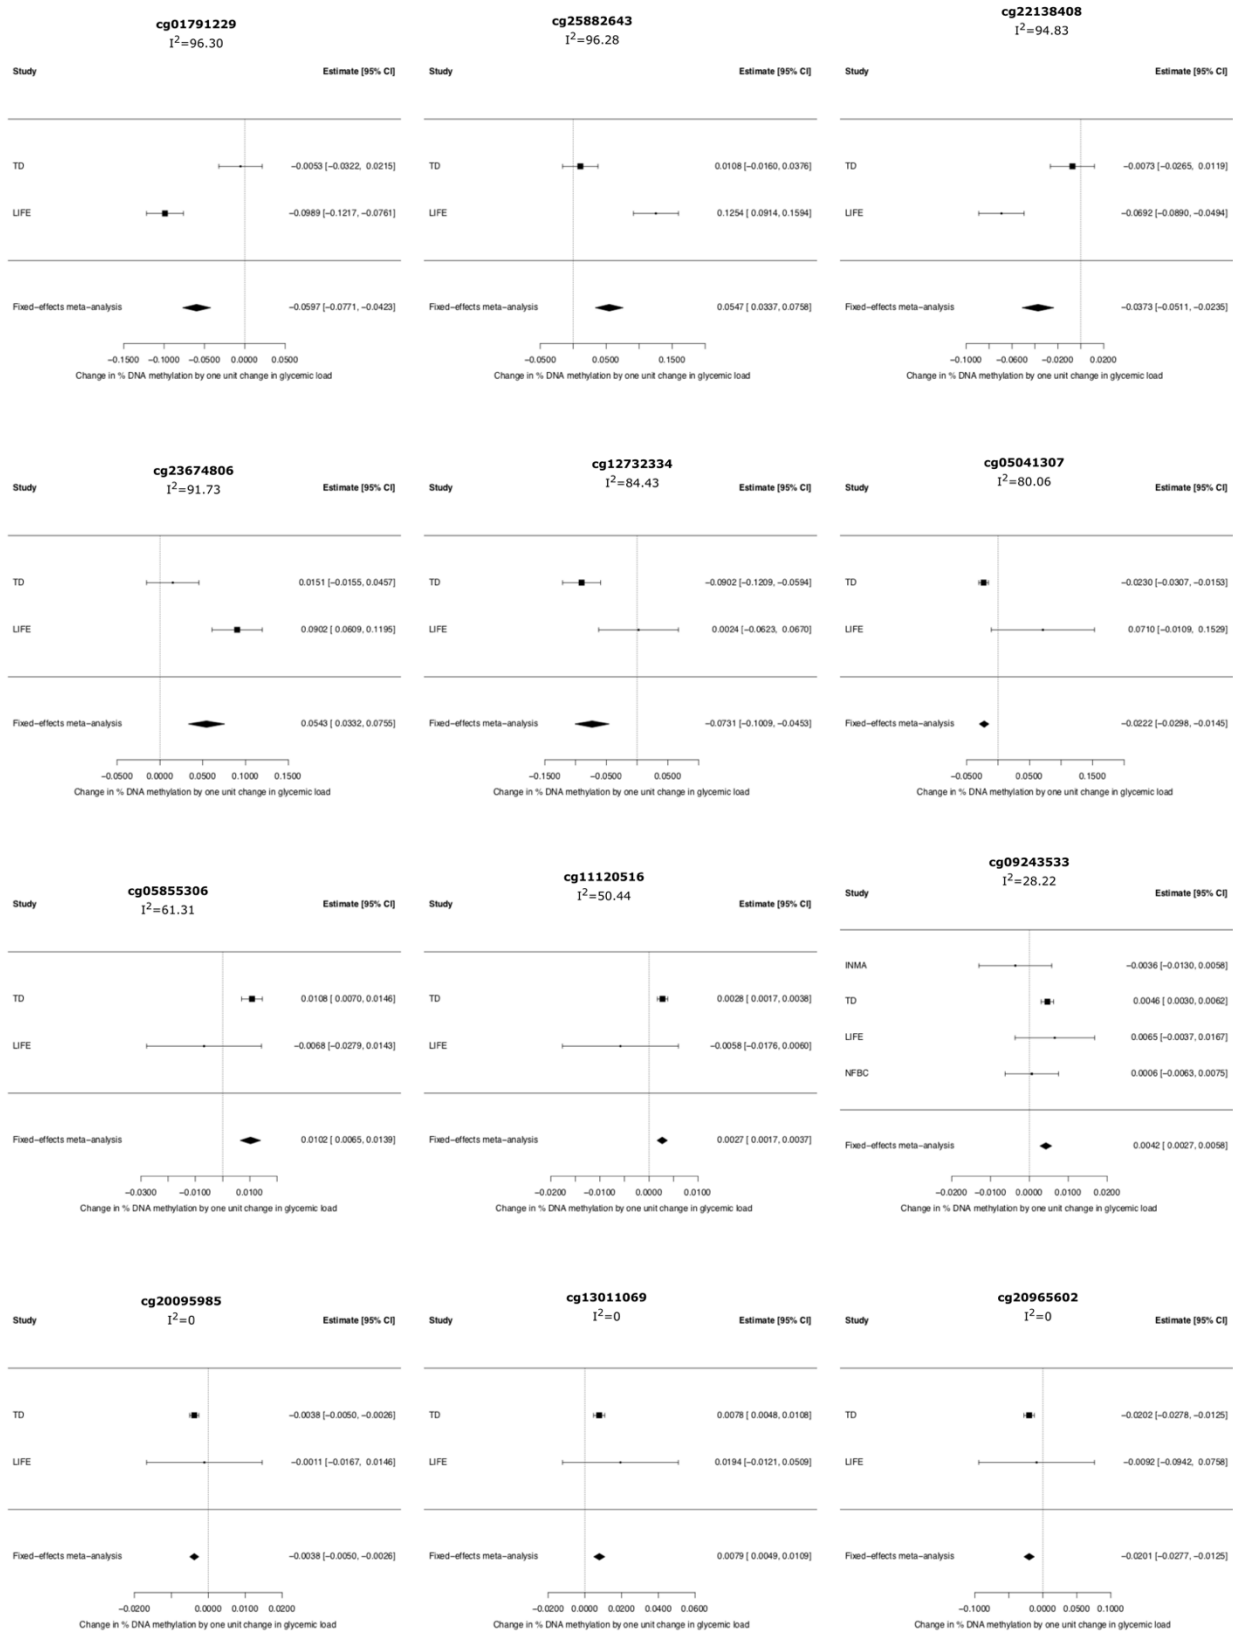

**Figure S4.** Forest plots of the meta-analysis results with highest heterogeneity based on  $I^2$ -value of the glycemic load normal weight model. Shown are the 12 most heterogenous probes. Cohort abbreviations: TD, Teendiab; LIFE, Life Child; NFBC, NFBC1986.

## Supplemental Figure S5: Forest plots of the probes with highest $I^2$ -value (first 12 CpGs) of the glycemic index overweight/obesity meta-analysis

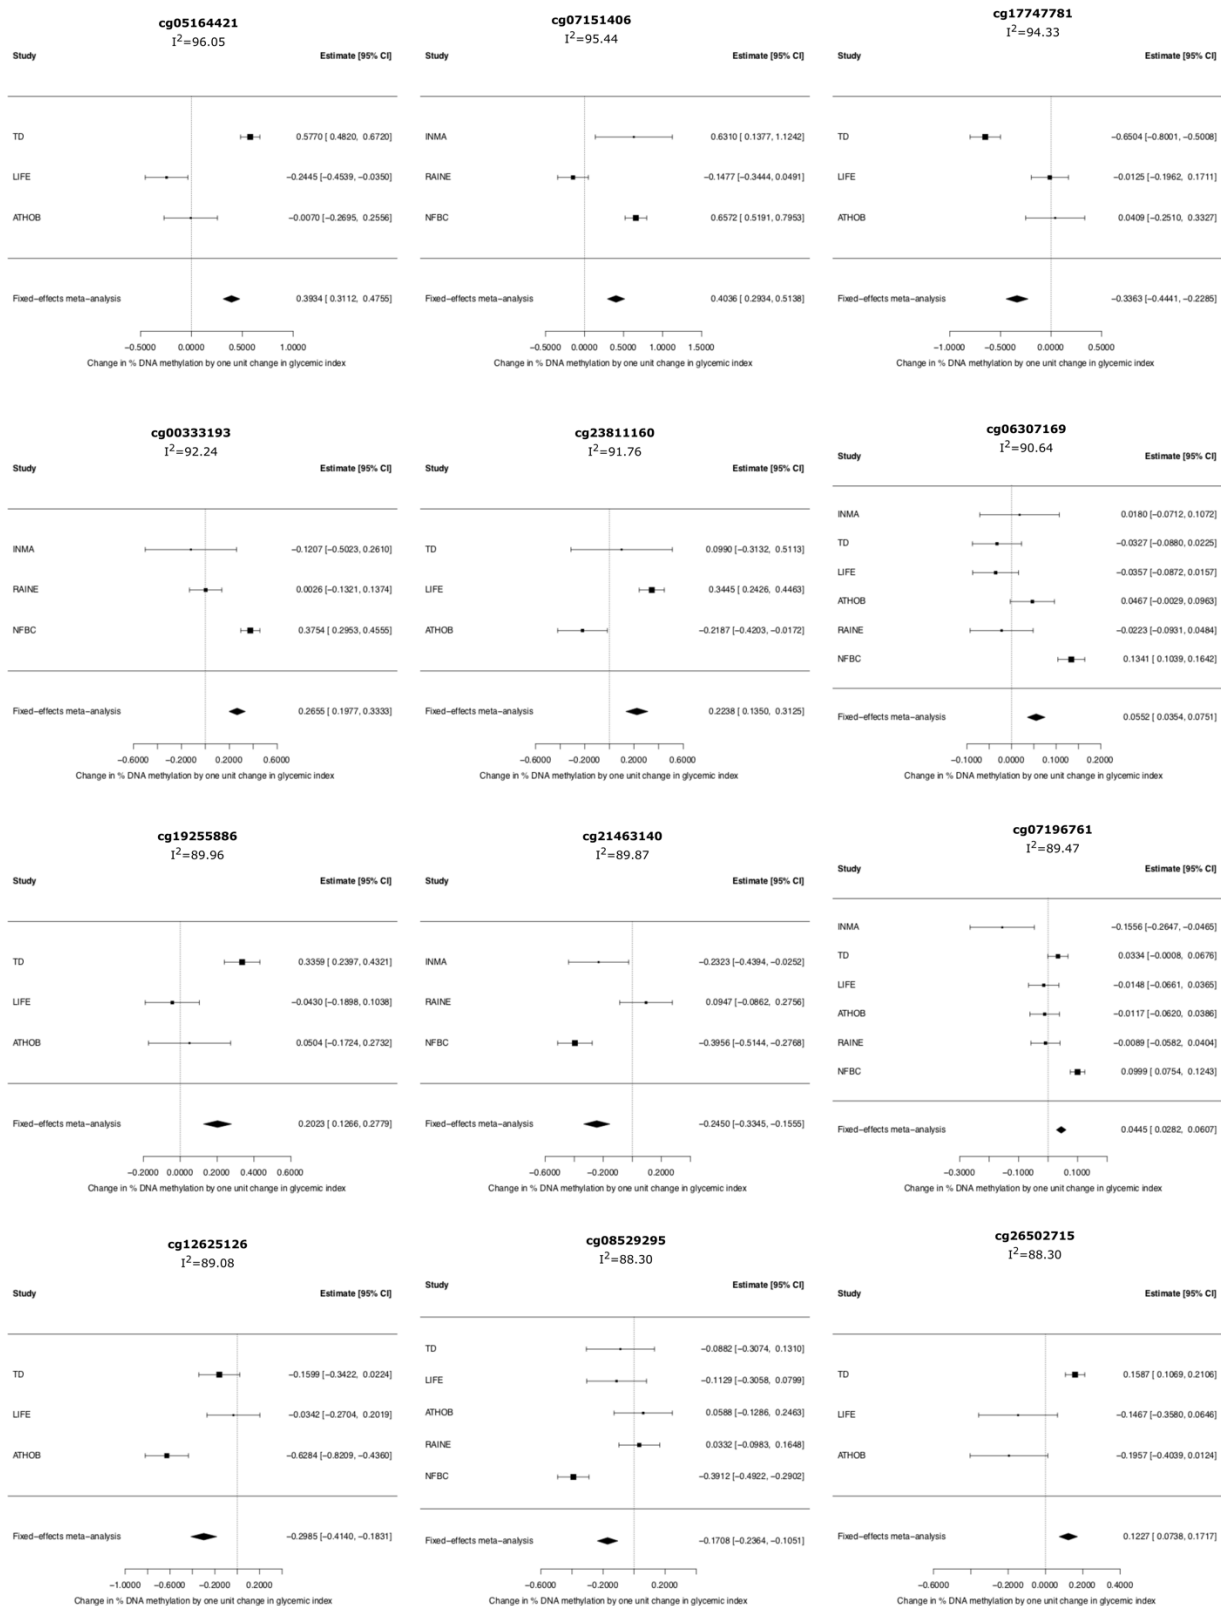

**Figure S5.** Forest plots of the meta-analysis results with highest heterogeneity based on  $I^2$ -value of the glycemic index overweight/obesity model. Shown are the 12 most heterogenous probes. Cohort abbreviations: TD, Teendiab; LIFE, Life Child; ATHOB, Atherobesity; RAINE, the Raine study, NFBC, NFBC1986.

## Supplemental Figure S6: Forest plots of the probes with highest $I^2$ -value (first 12 CpGs) of the glycemic load overweight/obesity meta-analysis

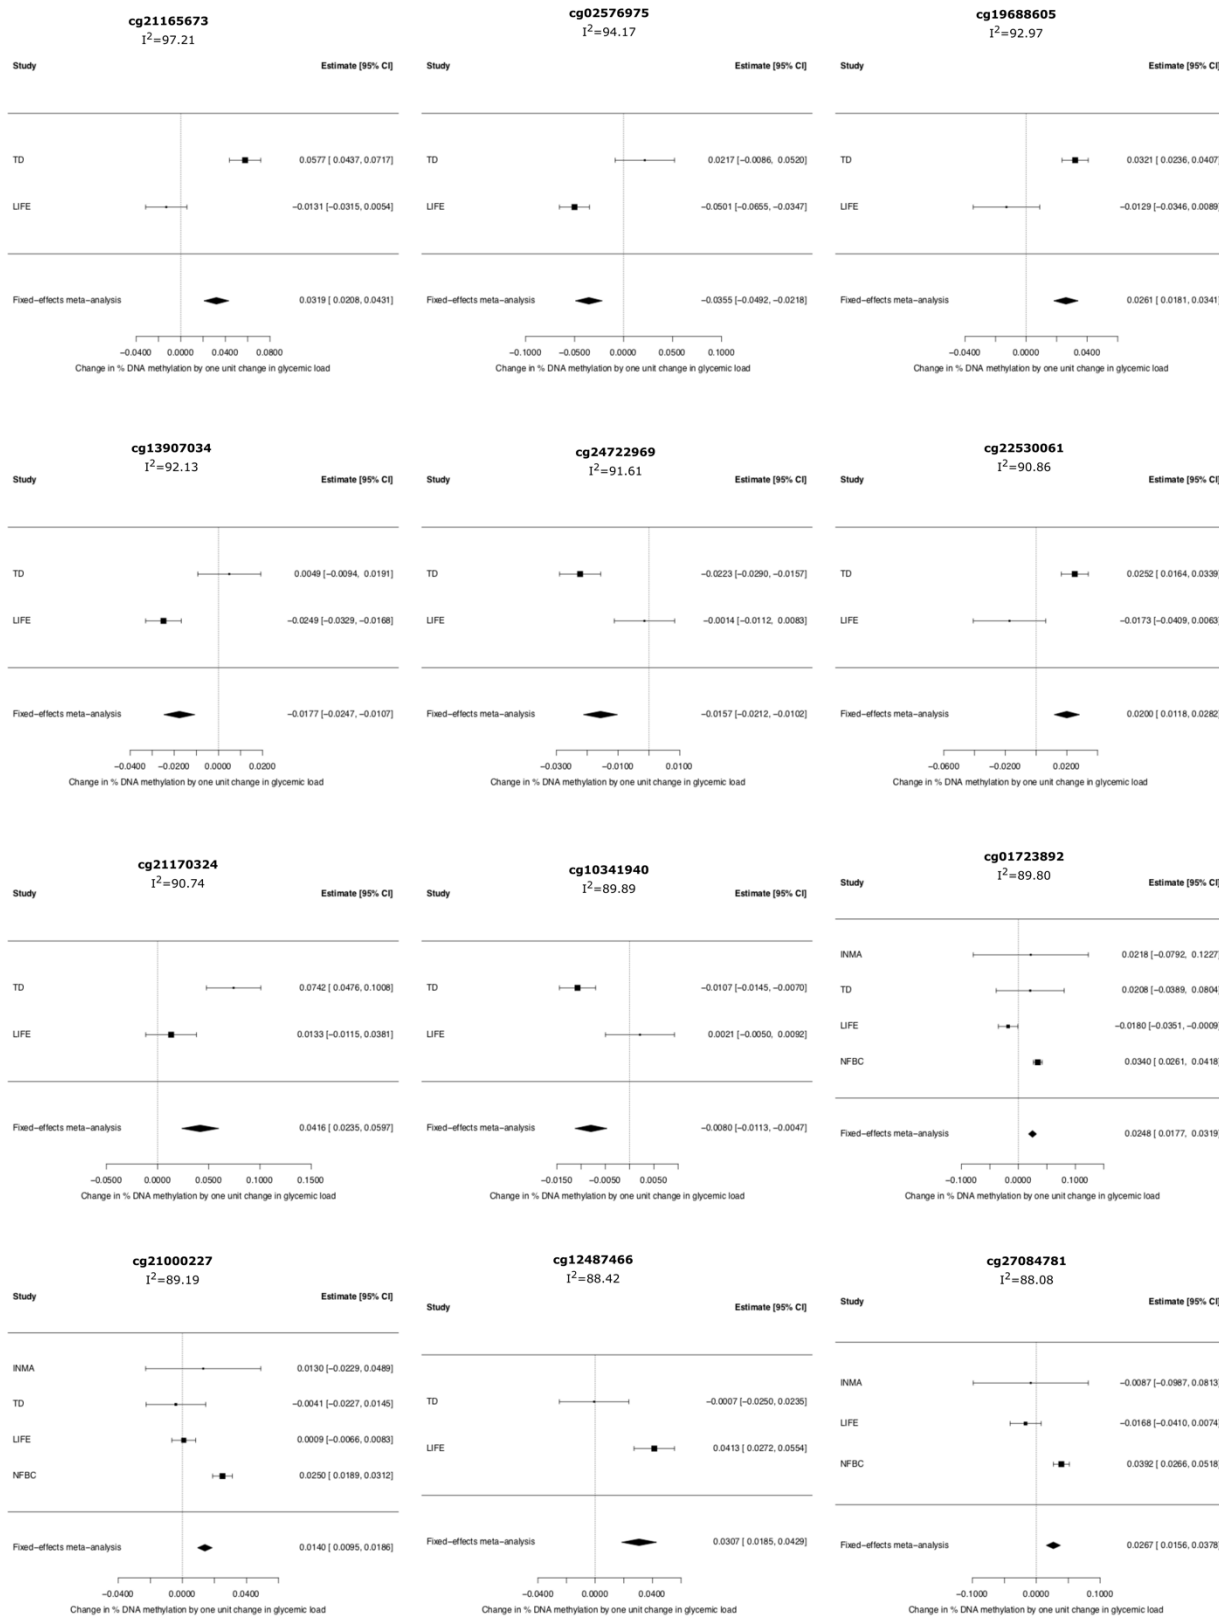

**Figure S6.** Forest plots of the meta-analysis results with highest heterogeneity based on  $I^2$ -value of the glycemic load overweight/obesity model. Shown are the 12 most heterogenous probes. Cohort abbreviations: TD, Teendiab; LIFE, Life Child; NFBC, NFBC1986.

## Supplemental Figure S7: Leave study out plots of the probes with highest $I^2$ -value (first 12 CpGs) of the glycemic index normal weight meta-analysis

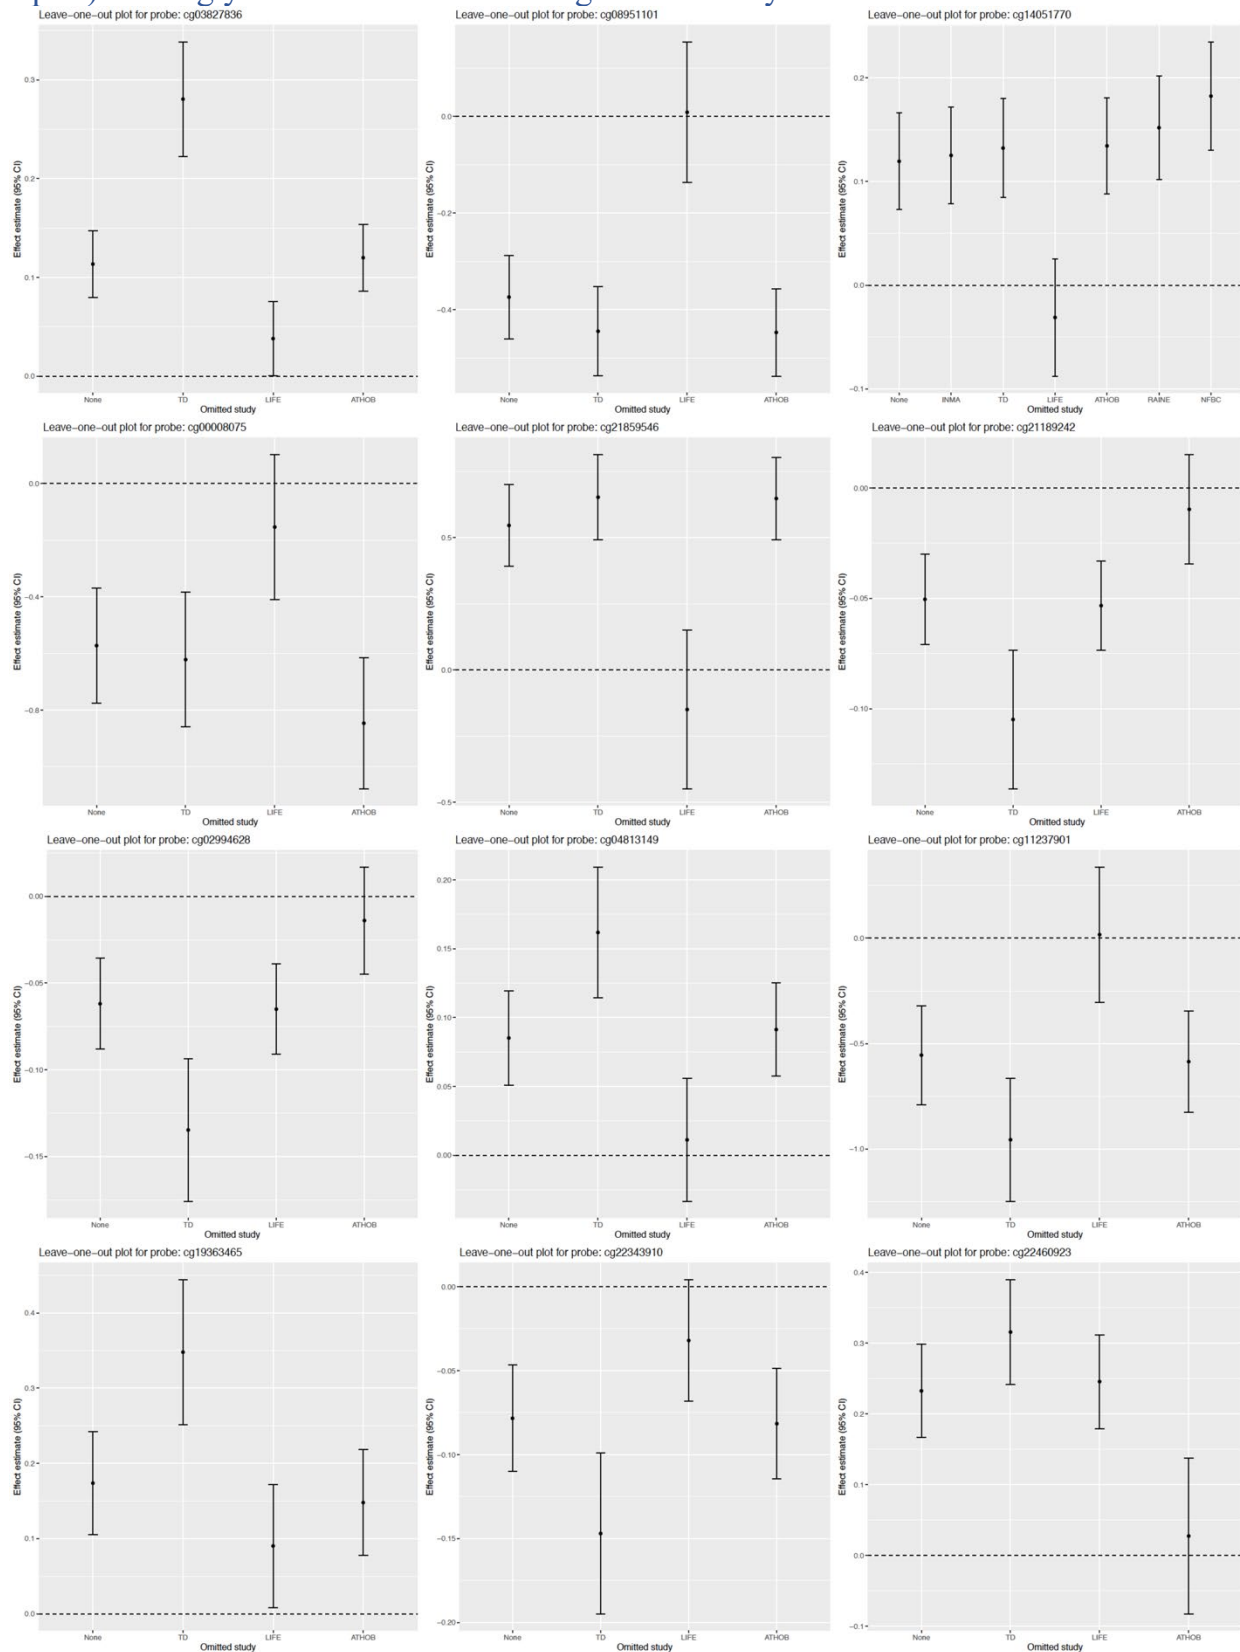

**Figure S7.** Leave study out meta-analysis effect estimates (95% CI) of the probes with highest heterogeneity based on  $I^2$ -value of the glycemic index normal weight model. Shown are the 12 most heterogenous probes. Cohort abbreviations: TD, Teendiab; LIFE, Life Child; ATHOB, Atherobesity; RAINE, the Raine study, NFBC, NFBC1986.

## Supplemental Figure S8: Leave study out plots of the probes with highest $I^2$ -value (first 12 CpGs) of the glycemic load normal weight meta-analysis

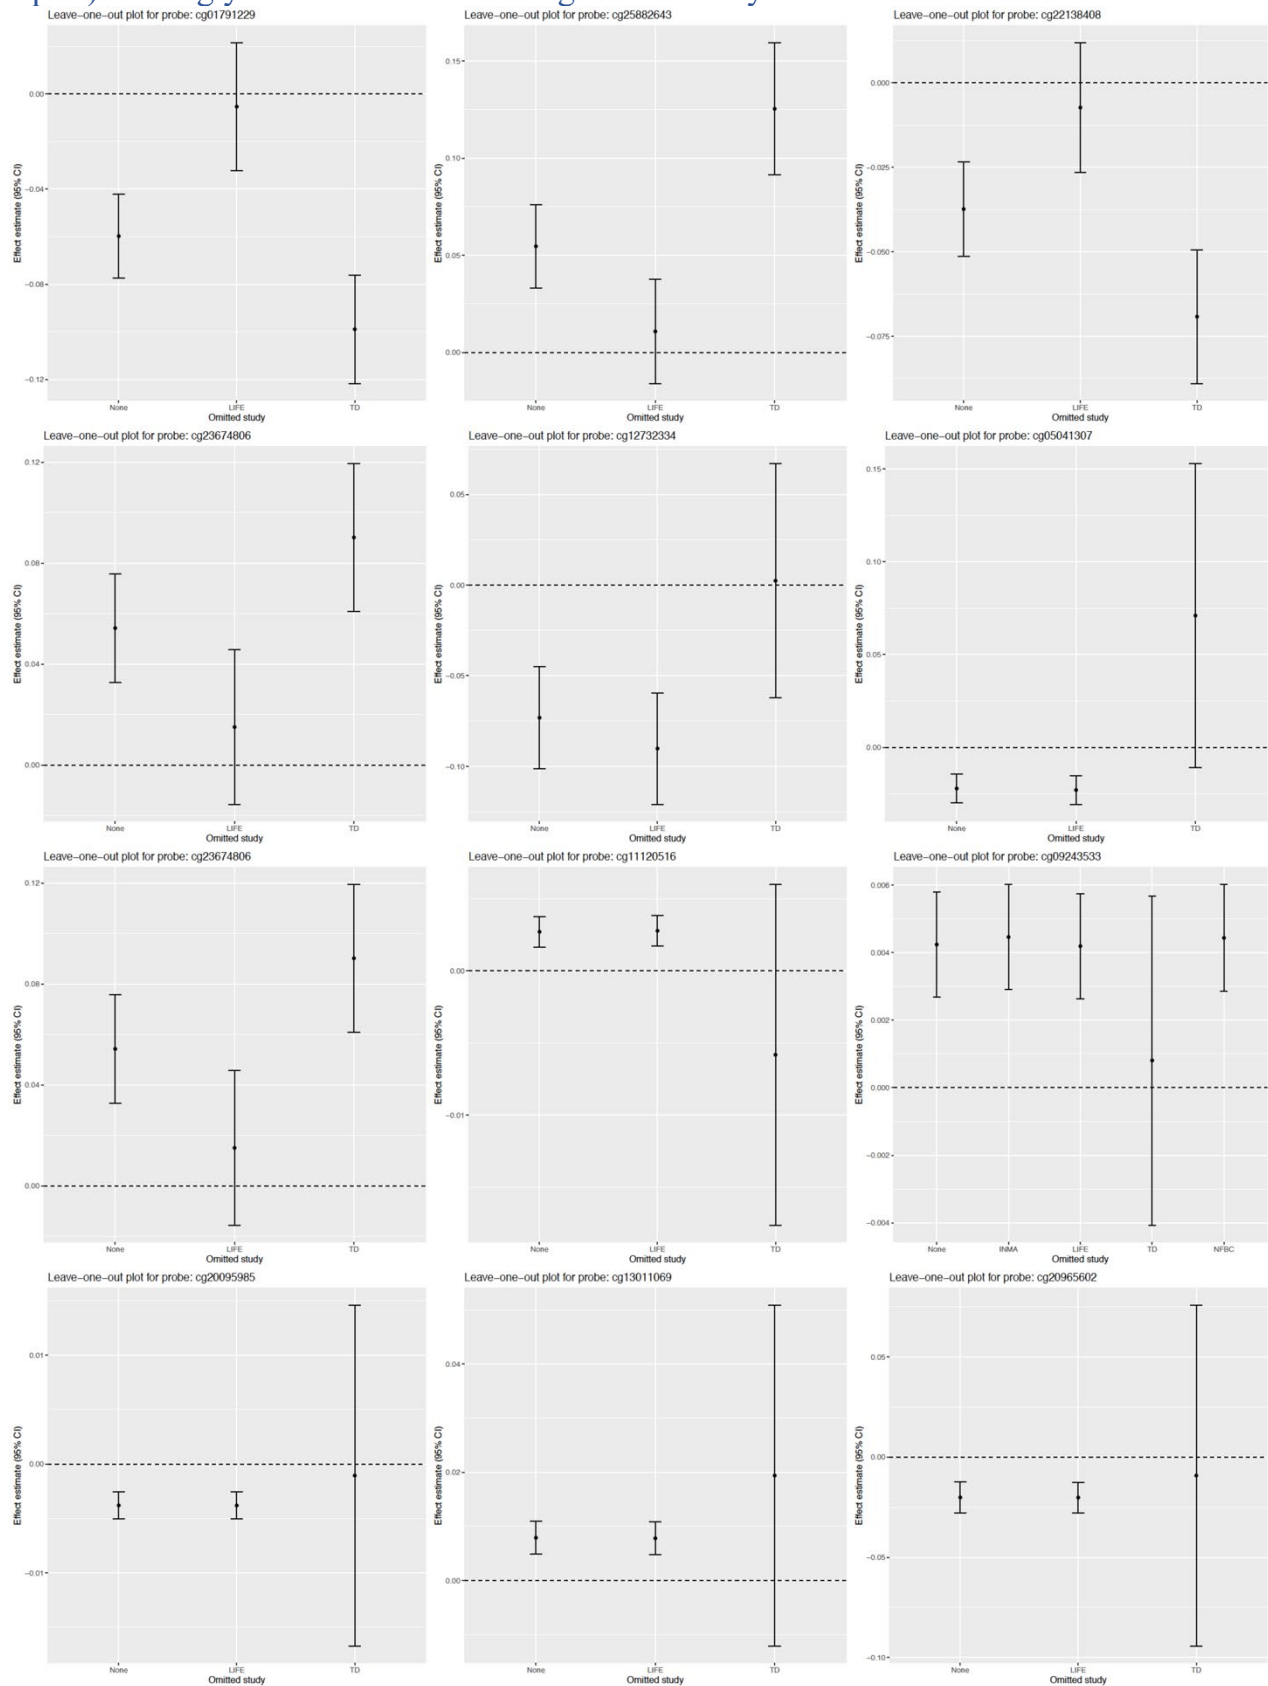

**Figure S8.** Leave study out meta-analysis effect estimates (95% CI) of the probes with highest heterogeneity based on  $I^2$ -value of the glycemic load normal weight model. Shown are the 12 most heterogenous probes. Cohort abbreviations: TD, Teendiab; LIFE, Life Child; NFBC, NFBC1986.

## Supplemental Figure S9: Leave study out plots of the probes with highest $I^2$ -value (first 12 CpGs) of the glycemic index overweight/obese meta-analysis

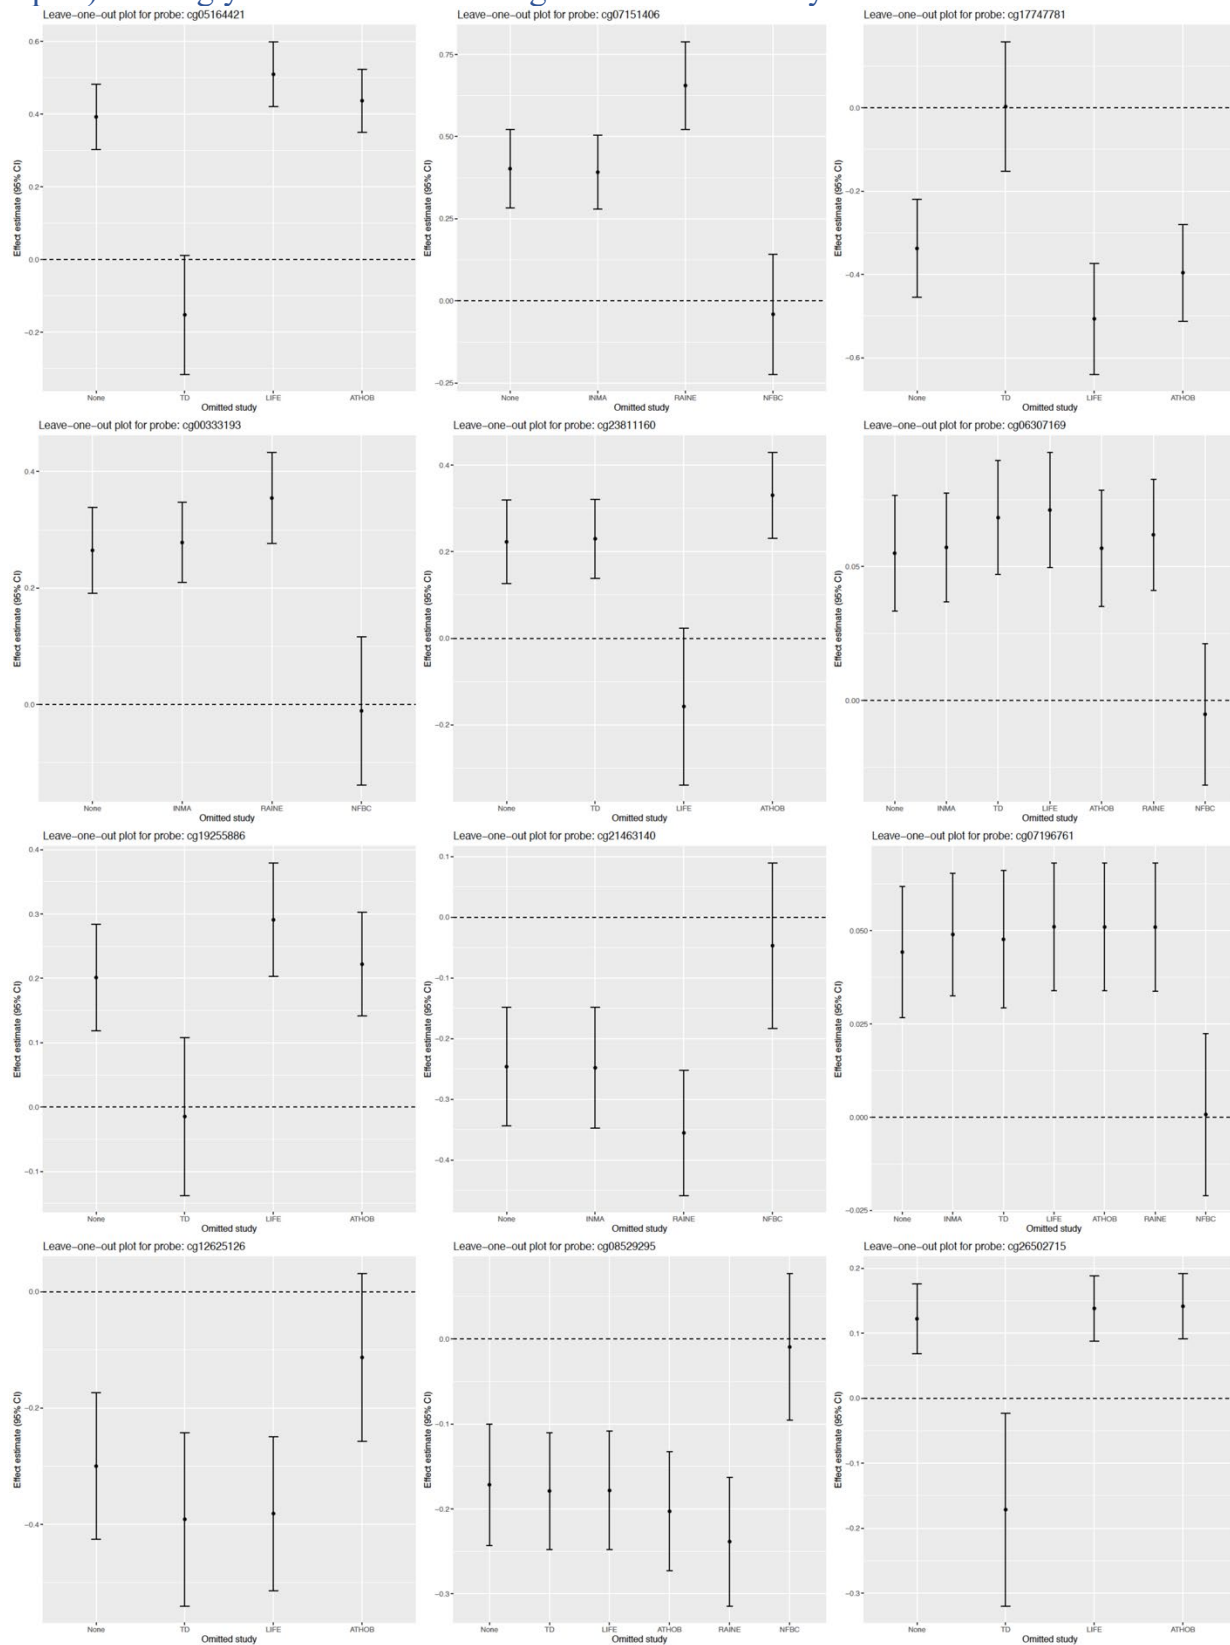

**Figure S9.** Leave study out meta-analysis effect estimates (95% CI) of the probes with highest heterogeneity based on  $I^2$ -value of the glycemic index overweight/obese model. Shown are the 12 most heterogenous probes. Cohort abbreviations: TD, Teendiab; LIFE, Life Child; ATHOB, Atherobesity; RAIN, the Raine study, NFBC, NFBC1986.

## Supplemental Figure S10: Leave study out plots of the probes with highest $I^2$ -value (first 12 CpGs) of the glycemic load overweight/obese meta-analysis

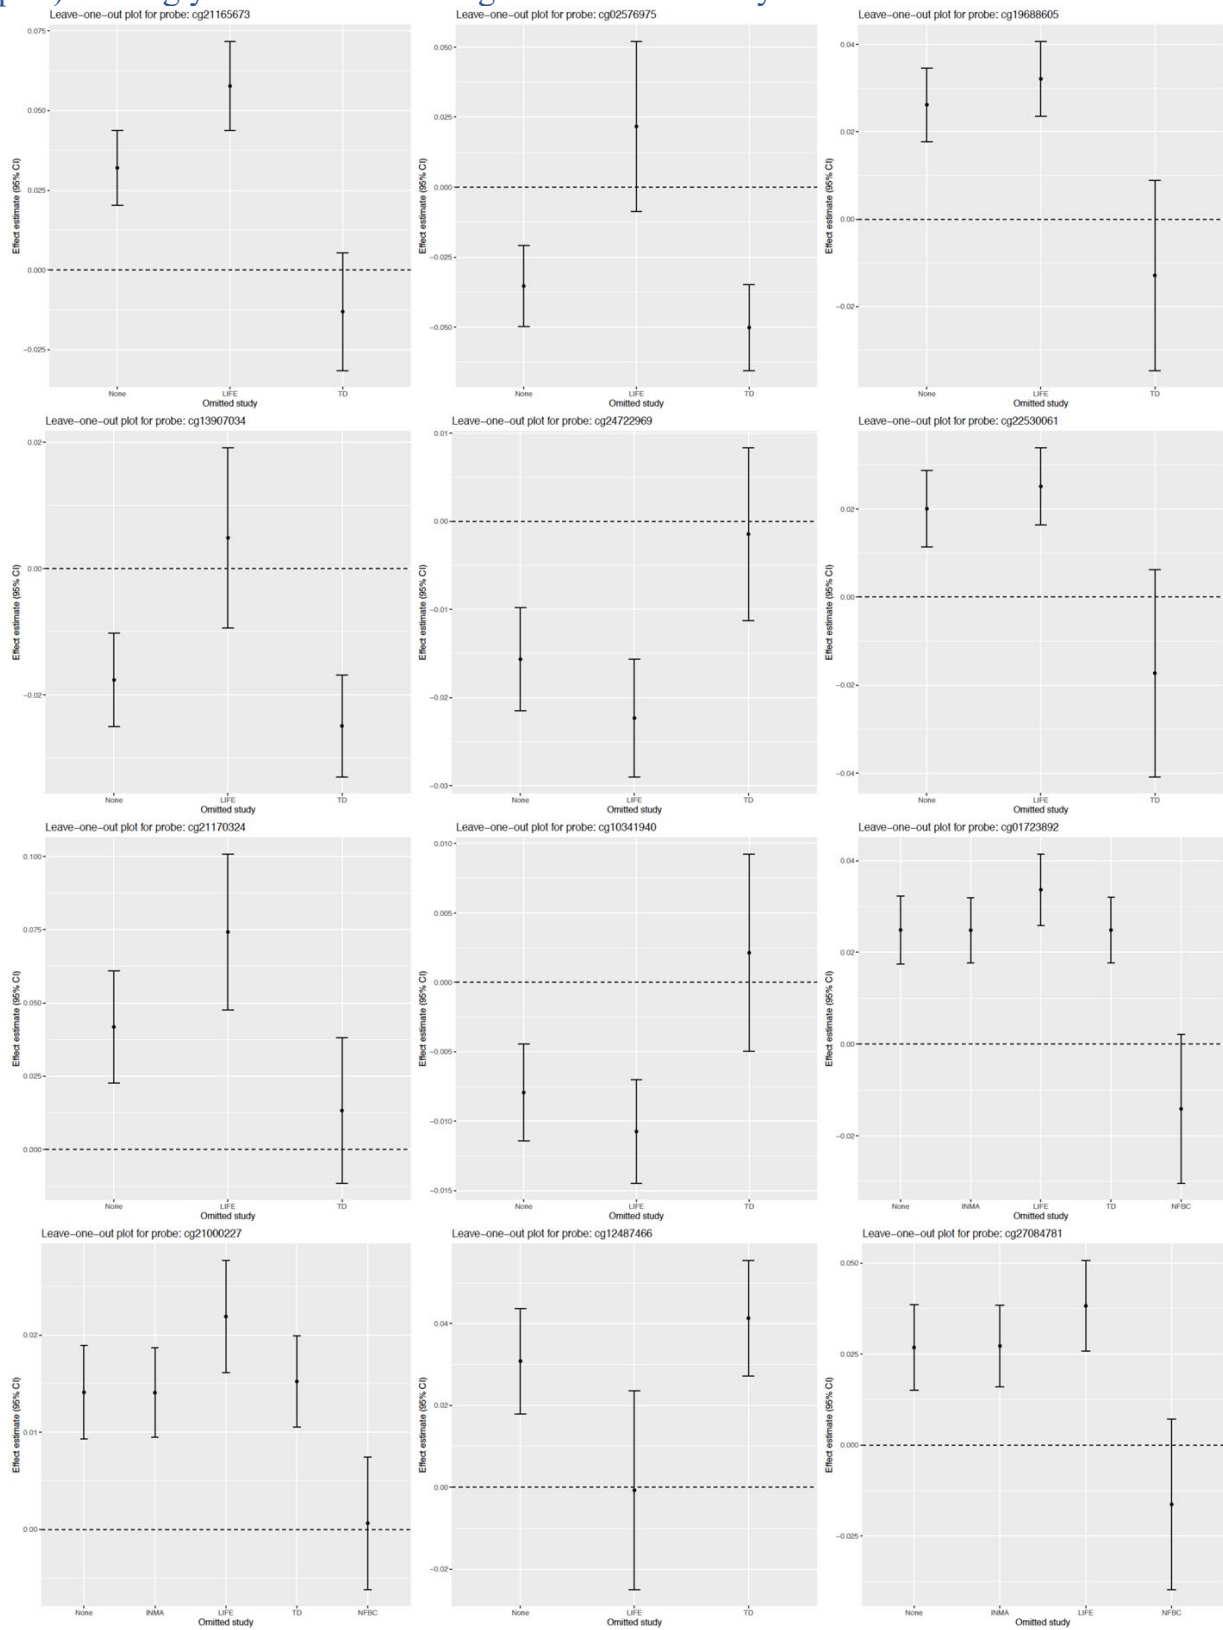

**Figure S10.** Leave study out meta-analysis effect estimates (95% CI) of the probes with highest heterogeneity based on  $I^2$ -value of the glycemic load overweight/obese model. Shown are the 12 most heterogenous probes. Cohort abbreviations: TD, Teendiab; LIFE, Life Child; ATHOB, Atherobesity; RAINE, the Raine study, NFBC, NFBC1986.

## Additional cohort information

### INMA

#### *Design and study population*

The INMA -Infancia y Medio Ambiente- (Environment and Childhood) Project is a network of birth cohorts in Spain that aim to study the role of environmental pollutants in air, water and diet during pregnancy and early childhood in relation to child growth and development (1). Data for this study came from INMA Sabadell cohort (children born between 2004 and 2007). The selected only the European ancestry children. Study website: <http://www.proyectoinma.org/>.

#### *Ethics statement*

The study has been approved by Ethical Committee of each participating centre and written consent was obtained from participating parents.

### TEENDIAB

#### *Design and study population*

The TEENDIAB study investigates the period of puberty and adolescence in the natural course of type 1 diabetes development (2). Between 2009 and 2015, a total of 610 children and adolescents aged 6-16 years with at least one first degree relative with type 1 diabetes and who were free of any diabetes-associated antibodies have been enrolled in this prospective observational cohort study. Follow-up visits took place every 6 months (on average) until the age of 18 years by 2016. The primary aims are to explore the roles of anthropometric, metabolic and genetic factors, as well as diet, physical activity, psychosocial factors and pubertal status in the development of islet autoimmunity and type 1 diabetes.

#### *Ethics statement*

The study was conducted according to the Declaration of Helsinki and approved by the ethical committee of the Technical University Munich (No. 2149/08) and Medizinische Hochschule Hannover (No. 5644). Written informed consent was obtained from children's parents.

### ATHEROBESITY

#### *Design and study population*

77 lean children and 112 children with overweight or obesity aged 6 to 18 years were recruited between 2007 and 2015 from the area around Leipzig and underwent detailed cardiovascular and metabolic characterization. The participants were subsequently invited to follow-up visits after 2, 5, 7 and 10 years. More details on the study population have been described elsewhere (3,4).

#### *Ethics statement*

The study meets the ethical standards of the Declaration of Helsinki as revised in 2008 and has been approved by the institutional review board of the Medical Faculty of the University Leipzig, Germany (registration number at institutional review board: 029-2006; registration number at [clinicaltrials.gov](https://clinicaltrials.gov/): NCT01605123). Written informed consent was provided by the legal guardians as well as the subjects themselves from the age of 12 years.

### LIFE Child

#### *Design and study population*

The LIFE Child study is a large population-based longitudinal childhood cohort study conducted in the city of Leipzig, Germany. As a part of LIFE, a research project conducted at the Leipzig Research Center for Civilization Diseases, it aims to monitor healthy child development from birth to adulthood and to understand the development of lifestyle diseases such as obesity. The study consists of three interrelated cohorts; the birth cohort, the health cohort, and the obesity cohort. Depending on age and cohort, the comprehensive study program comprises different medical, psychological, and sociodemographic assessments as well as the collection of biological samples. Optimal data acquisition, process management, and data analysis are guaranteed by a professional team of physicians, certified study assistants, quality managers, scientists and



statisticians. Due to the high popularity of the study, more than 5000 children have already participated so far, and most of them participate continuously. The large quantity of acquired data allows LIFE Child to gain profound knowledge on the development of children growing up in the twenty-first century. The LIFE Child study has been described in more details elsewhere (5)

#### *Ethics statement*

The study meets the ethical standards of the Declaration of Helsinki as revised in 2008 and has been approved by the institutional review board of the Medical Faculty of the University Leipzig, Germany (registration number at institutional review board: 264-10-19042010; registration number at clinicaltrials.gov: NCT 02550236). Written informed consent was provided by both parents as well as the subjects themselves from the age of 12 years.

### NFBC1986

#### *Design and study population*

The Northern Finland Birth Cohort 1986 (NFBC1986) is a longitudinal, population-based birth cohort comprising all births with an expected date of delivery between July 1, 1985 and June 30, 1986 in the Finnish provinces of Oulu and Lapland. 9,203 live-born individuals entered the study from which 7,182 answered the questionnaire and 6,795 completed the clinical examination at 16 years-of age (6).

#### *Ethics statement*

Approval for the studies was granted by the ethics committee of the Northern Ostrobothnia Hospital District in Oulu, Finland in accordance with the declaration of Helsinki.

### Raine Study Gen2

#### *Design and study population*

The Raine Study is a prospectively recruited longitudinal pregnancy cohort that recruited 2900 mothers between 1989 and 1991 from Western Australia's major perinatal centre, King Edward Memorial Hospital, and nearby private practices. Women (Gen1) who had sufficient English language skills, an expectation to deliver at King Edward Memorial Hospital, and an intention to reside in Western Australia to allow for future follow-up of their child (Gen2) were eligible for the study (7).

#### *Ethics statement*

Informed consent was provided by all participants. Participant assent and parental consent was provided for minors. The Raine Study has ethics approval from The University of Western Australia Human Research Ethics Committee.

## Additional cohort information on covariables

### INMA

During the post-partum visit, age and sex of the child was collected by maternal self-report using a standardized questionnaire. None of the children smoke and therefore, smoking was not included into the models. Maternal education was collected by standardized questionnaires and categorized into three groups (low, medium and high) using the highest education level of the mothers. Child BMI was calculated using the height and weight measured at study visit by trained personal.

### TEENDIAB

At each visit, age, sex and smoking status of the child/adolescent was collected by self-report using a standardized questionnaire. None of the included children reported smoking and therefore, smoking was not included into the models. Parental education was collected standardized questionnaires and categorized into three groups (low, medium and high) using the highest education level of the parents. Child BMI was calculated using the height and weight measured at study visit by trained personal.

## ATHEROBESITY

At each visit, age, sex and smoking status of the child was collected by self-report using a standardized questionnaire. Only very few children smoked and therefore, smoking was not included into the models. Parental education was collected by standardized questionnaires and categorized into three groups using the highest education level of the parents (“low” = no professional education at all, “medium” = vocational training, “high” = academic degree). Child BMI was calculated using the height and weight measured at study visit by trained personal.

## LIFE Child

At each visit, age, sex and smoking status of the child was collected by self-report using a standardized questionnaire. Only very few children smoked and therefore, smoking was not included into the models. As a measure of parental education, the socioeconomic status was calculated based on information regarding school education, professional education, profession and income, which were collected by standardized questionnaires (8). Hereby, the socioeconomic status could potentially range from 3 to 21 points and was divided into three categories: “low” (< 8.5), “medium” (8.5 up to 15.4) and high (> 15.4). Child BMI was calculated using the height and weight measured at study visit by trained personal.

## NFBC1986

Age and sex were collected from birth records. At the clinical 16-year follow-up visit weight (kg) and height (cm) was measured, and BMI was calculated. At the time of follow-up visit, participants filled in a postal questionnaire about current smoking status with which was dichotomized (also “occasionally smoking” was categorized as smoking). Parental highest education was obtained via postal questionnaire from parents and was categorized from 1 to 6: 1. no professional training (low); 2. Vocational school or college 6-12 months (low); 3. Vocational school or college > 1 years (medium); 4. College-level training (medium); 5. University of applied sciences (high); 6. University degree (high).

## Raine Study Gen2

To calculate BMI, trained researchers conducted weight and height measurements at the 14-year follow-up. Weight was measured to the nearest 100 g, using a Wedderburn Digital Chair Scale, and height was measured to the nearest 0.1 cm, with a Holtain stadiometer. Parental education was assessed using a self-report parental questionnaire. Age was determined using date of birth and date of assessment. Date of birth and sex were collected from birth records.

## Additional cohort information on dietary assessment

### INMA

The 105 item semi-quantitative food frequency questionnaire (FFQ) was administered to the parents to evaluate child’s usual dietary intake for the last 12 months at the 4-year assessment. The FFQ was previously validated by interviewing twice the parents or care-givers of children over a 9-month period. Reproducibility was explored by comparing intake of nutrients by the FFQs, while validity was examined by comparing the nutrient values from the FFQs with the average nutrient values of three 24-hour dietary recall (24hDR) taken in the period, and also, with the concentration in blood specimens for several vitamins (carotenoids, folate, vitamin B12, vitamin C and  $\alpha$ -tocopherol). Pearson correlation coefficients and de-attenuated correlation coefficients were calculated and we also evaluated misclassification by quintile distribution. More details of the validation can be found elsewhere (9)

### TEENDIAB

Habitual dietary intake was assessed at first study visit using the modified computer-assisted Diet Interview Software for Health Examination Studies Junior (DISHES Junior; Robert Koch Institute, Berlin, Germany). The standardized questionnaire was performed by face-to-face interview with trained staff and collected detailed data on the consumed frequency, type and quantity of foods and beverages of the last four weeks (10).

## ATHEROBESITY

Patients had to fill out a dietary protocol as detailed as possible over 3-5 days. Data were matched with the software EBISpro 2016 to the item of the “Bundeslebensmittelschlüssel”. Overall, 761 different food items were specified by participants.

## LIFE Child

In the LIFE Child study, dietary data was collected in children and adolescents aged six years and older. The FFQ used in the LIFE Child study is described in more detail in Stiegler et al. (11).

## NFBC1986

At the 16-year visit, a FFQ was filled out by each subject. The FFQ contained food items generally consumed in Finland and was not designed for a specific trait. The collection of dietary data and blood sampling was completed during one year.

## Raine Study Gen2

Adolescents who attended the 14-year follow-up assessment at the Telethon Institute for Child Health Research in Perth, Western Australia, were given a 3-day food record to complete, with parental assistance allowed if required. Metric measuring cups and spoons were provided to assist with quantification of serve sizes. Adolescents indicated whether each day was representative of their usual eating habits. As the food records were returned, they were checked by a dietitian who clarified details over the telephone where necessary. Data were analysed using Food Works (Professional Version 4.00, Xyris Software, Brisbane, Queensland, Australia) and a customized GI database (12).

## Additional cohort information on DNA methylation analyses

### INMA

Child blood collected at the age of 4 years was extracted using the Chemagen kit (Perkin Elmer). DNA concentration was determined by NanoDrop spectrophotometer (Thermo Scientific) and with the Quant-iT PicoGreen dsDNA Assay Kit (Life Technologies). Methylation data was produced in two different laboratories as part of two different projects: in the Genome Analysis Facility of the University Medical Center Groningen (UMCG) in Holland, and in the Bellvitge Biomedical Research Institute (IDIBELL, Barcelona). Both laboratories used the recommended Illumina protocol for the Infinium HumanMethylation450 beadchip. Briefly, 500 ng of DNA was bisulfite-converted using the EZ 96-DNA methylation kit following the manufacturer's standard protocol, and DNA methylation measured using the Illumina Infinium HumanMethylation450 beadchip. DNA methylation data were quality controlled and preprocessed using the minfi package (13). A series of steps were completed for quality control and data analysis. The first step was low quality sample removal. First, 2 samples with bad overall quality or with low detection p-value according to the output of the MethylAid package (14) were removed. Then, we removed 3 samples whose sex was wrongly predicted using shinyMethyl were eliminated (15). Following guidelines of Lehne work (16), we increased the stringency of the detection p-value threshold to 10E-16 and we filtered 18 samples with a call rate lower than 98%. Data was normalized with the functional normalization method. Correlation between SNPs in replicates replicated samples was checked and probes not measuring SNPs were discarded. 7,136 probes with a call rate lower than 95% were also removed. Probes in sexual chromosomes, crosshybridizing or containing SNPs were flagged but not removed at this point. ComBat was applied to remove laboratory batch effect (17). Finally, duplicated samples were removed, prioritizing MeDALL samples over BREATHE samples. In this current study we used samples collected at 4 years: 182 samples and 476,946 CpGs. Child blood cell proportions were estimated using the Reinius reference panel (18) with the pickCompProbes method (minfi) for CpG selection, and the Houseman algorithm (19) for deconvolution of 6 main blood cell types.

## TEENDIAB

DNA was extracted from whole blood. Bisulfite conversion of genomic DNA was performed and bisulfite-converted DNA was subjected to a genome-wide DNA methylation analysis performed using the Illumina Infinium MethylationEPIC 850k Bead-Chip array (San Diego, CA). All samples were randomized across the chips and analyzed on the same machine by the same technician to reduce batch effects. After single-base extension and staining, the BeadChips were imaged with the Illumina iScan. Raw fluorescence intensities of the scanned images were extracted with the GenomeStudio Methylation module (Illumina). The fluorescence intensity ratio was used to calculate the  $\beta$ -value. All samples had high bisulfite conversion efficiency (signal intensity >4,000) and were included for further analysis based on GenomeStudio quality control. Quality control was performed using R software (version 4.0.3). The DNA methylation IDAT files were imported using the R package *minfi* for pre-processing and quality control (13). The following probes were excluded from further analysis: probes with a detection P value  $\geq 0.01$  for at least one sample, cross-hybridizing probes, probes with a bead count less than three in at least 5% of the samples, non-CpG probes, and probes that lie near single nucleotide polymorphisms. Probes on chromosomes X and Y were used for sex estimation and then excluded from downstream analyses. Samples with <99% probes with a detection P value <0.01 were excluded. Probe design biases and batch effects were normalized using R packages ENmix and sva (20), respectively. After quality control, cell composition was estimated from a reference panel using the R package FlowSorted.Blood.EPIC.

To remove unwanted variation/batch effects, Combat method was applied as implemented in the R package (17).

## ATHEROBESITY

Preprocessing was done applying Bioconductor packages ChAMP 2.18.3 (21) jointly with the samples of the LIFE Child Study. Only probes present in all samples were considered. Preprocessing included k-nearest neighbor imputing of missing values (with parameter  $k=3$ ), filtering of methylation probes at detection p-value threshold 0.01, filtering probes with a bead count of less than three in 5 or more percent of samples, removing non-CG probes, filtering probes which fall near SNPs and which align to multiple locations, both as defined by Nordlund et al. (22) and filtering probes with missingness higher than 10%. Samples identified as outlier in multi-dimensional-scaling, with high proportion of failed detection-p-value (>10%), and irregular distribution of density distribution of methylation values were removed ( $n=4$ ). Data was normalized using the BMIQ (Beta MIXture Quantile dilation) method (23). Initial batch-adjustment was done applying ComBat on expression-chip batches without protecting any contrasts (20). Finally, 12 samples were removed, as reported sex and sex imputed from methylation data was conflicting. Cell type proportions were estimated applying previously reported reference data (19). The Satrix ID was used for batch correction.

## LIFE Child

Preprocessing was done applying Bioconductor packages ChAMP 2.18.3 (21) jointly with the samples originating from the Leipzig Atherobesity Childhood Cohort. Only probes present in all samples were considered. Preprocessing included k-nearest neighbor imputing of missing values (with parameter  $k=3$ ), filtering of methylation probes at detection p-value threshold 0.01, filtering probes with a bead count of less than three in 5 or more percent of samples, removing non-CG probes, filtering probes which fall near SNPs and which align to multiple locations, both as defined by Nordlund et al. (22), and filtering probes with missingness higher than 10%. Samples identified as outlier in multi-dimensional-scaling, with high proportion of failed detection-p-value (>10%), and irregular distribution of density distribution of methylation values were removed ( $n=2$ ). Data was normalized using the BMIQ (Beta MIXture Quantile dilation) method (23). Initial batch-adjustment was done applying ComBat on expression-chip batches without protecting any contrasts (20). Finally, 6 samples were removed, as reported sex and sex imputed from methylation data was conflicting. Cell type proportions were estimated applying previously reported reference data (19). The Satrix ID was used for batch correction.

## NFBC1986

Offspring DNA methylation was assayed using Infinium HumanMethylation450 BeadChip (Illumina, Inc., San Diego, CA, USA) for 546 randomly selected subjects. Bisulphite conversion of genomic DNA was performed using the EZ DNA methylation kit according to manufacturer's instructions (Zymo Research,

Orange, CA). From these, 24 technical replicates, 18 samples that did not reach a call rate of >95% applying a detection P-value filter of 10-16 and 7 samples with gender inconsistency were excluded. DNA methylation data of 517 samples were used in the analysis. DNA methylation data was normalised by functional normalisation (24) and potential confounding effects of blood cell subtypes were estimated by the Houseman method (25).

### Raine Study Gen2

Clinical examination of the offspring at the age of 16 years was conducted between April 2007 and February 2008. Offspring DNA methylation was assayed using Infinium HumanMethylation450 BeadChip (Illumina, Inc., San Diego, CA, USA) for 546 randomly selected subjects. Bisulphite conversion of genomic DNA was performed using the EZ DNA methylation kit according to manufacturer's instructions (Zymo Research, Orange, CA). Processing of the Illumina Infinium HumanMethylation450 BeadChips was carried out by the Centre for Molecular Medicine and Therapeutics (CMMT) (<http://www.cmmt.ubc.ca>). Two packages were used to perform QC checks of the samples; shinyMethyl (15) and MethylAid (14). Samples that were evident as outliers based on the output from shinyMethyl and MethylAid were removed. Gender discrepancy was inferred using the RnBeads package (26), and samples showing discrepancies were excluded. Samples that were run in duplicate or triplicate present on the Bead-Chip were used to assess genetic similarity between these individuals as a check for sample mix-ups. Samples showing signs of contamination based on heatmap produced by the RnBeads package were excluded. Intentional SNP probes, sex chromosome probes and probes with a detection p-value greater than 0.05 in any sample were removed. Probes with low bead counts (bead count < 3 in more than 5% of samples) were also removed. Methylation data were normalized and batch effects accounted by using functional normalization method (24). Potential confounding effects of blood cell subtypes were estimated by the Houseman method (19). Plate was used as technical variable in the models. In addition, we adjusted for time difference between time of dietary questionnaire and time of blood sampling.

### Material and methods – Mendelian randomization (two-sample) analysis

We evaluated the overlap between the CpGs significantly associated with GI/GL in the meta-analysis and mQTLs of the ARIES data at childhood (834 Europeans; 39,833 cis- and trans-mQTLs, 8282911 input SNPs, 395625 input CpGs) (27). Next, we queried the public GWAS catalog (<https://www.ebi.ac.uk/gwas/home>) for the traits childhood obesity and obesity ([https://www.ebi.ac.uk/gwas/efotraits/EFO\\_0001073](https://www.ebi.ac.uk/gwas/efotraits/EFO_0001073); 295 associations), cardiovascular disease ([https://www.ebi.ac.uk/gwas/efotraits/EFO\\_0000319](https://www.ebi.ac.uk/gwas/efotraits/EFO_0000319); 10,141 associations) and type 2 diabetes ([https://www.ebi.ac.uk/gwas/efotraits/MONDO\\_0005148](https://www.ebi.ac.uk/gwas/efotraits/MONDO_0005148); 5,443 associations) and evaluated the overlap between genetic risk variants of these traits and the identified mQTLs. We performed mendelian randomization analysis (two-sample) using the Wald-estimate as implemented in the *TwoSampleMR* R package. The ARIES mQTL data were used as exposure set and the overlapping genetic variants as instrumental variables.

### Material and methods – eQTM analyses Leipzig Childhood Adipose Tissue Cohort

We analysed 223 participants from the Leipzig Childhood AT Cohort, for which subcutaneous adipose tissue samples had been obtained as previously described (28).

Methylome profiling was obtained with the Illumina Infinium MethylationEPIC BeadChip Kit (Illumina, California, USA). The Illumina intensity data (IDAT) files were processed using the ChAMP pipeline (21) implemented in the corresponding in R package, filtering out probes with detection p-value > 0.1 and low bead counts, non-CpG probes, SNP-related probes, and probes on sex chromosomes. Intra-array between-sample bias was corrected using beta-mixture quantile normalization (BMIQ), and batch effects and unknown confounders were removed using Combat (17). Methylation levels at each CpG site were expressed as a  $\beta$ -value representing the approximate proportion of methylation at the site (0–100%).

RNA transcript levels were quantified via Illumina HumanHT-12 v4.0 Expression BeadChip (Illumina, California, USA). 48,106 probes, corresponding to 47,230 gene-expression probes and 876 control probes, could be successfully imputed. Mapping of genes corresponding to expression probes and assignment of gene names was done using a remapping approach (29) which resulted in 23,593 valid gene-expression probes



corresponding to 17,726 unique genes with good or perfect annotation quality grade. Transcription start and end sites according to Ensembl version 106 (April 2022) were retrieved via the Bioconductor package biomaRt (<https://bioconductor.org/packages/release/bioc/html/biomaRt.html>). Prior to the analysis, expressions were quantile-normalised and log2 transformed.

We looked up the association of the 537 prioritized CpGs with the gene transcripts. 35 of the 537 prioritized CpGs were not available as they were discarded during the pre-processing phase, while a further 22 did not fall within a 500kb region of the transcription start site of valid gene transcripts. For each of the remaining 480 CpGs, we regressed the log2 expression signals for the transcripts on methylation  $\beta$ -values for the CpG, using linear regression models adjusted for age and sex. We declared statistical significance of each CpG-transcript pair according to a Bonferroni-corrected p-value, with denominator corresponding to the number of tests evaluated for each pair. The number of tests for each pair was determined as the total number of CpGs tested (480, since 57 CpGs were discarded prior to the statistical analysis) plus the number of tests per each unique CpG-transcript pair.

## Acknowledgements

### INMA

We particularly thank all the cohort participants for their generous collaboration.

### TEENDIAB

We thank the TEENDIAB team for taking care of the families, for performing visits and challenge tests, and for entering data in the database. We want to thank all the families participating in the TEENDIAB study and also all the pediatricians, diabetologists, and family doctors in Germany for recruitment and continuous support. Also, we would like to thank Mickael Canouil, Amelie Bonnefond and Philippe Froguel (Inserm UMR1283, CNRS UMR8199, European Genomic Institute for Diabetes (EGID), Institut Pasteur de Lille, Université de Lille, France) for performing DNA methylation measurements and quality control of the data.

### ATHEROBESITY

We thank all children and their legal guardians who participated in the study. We very gratefully appreciate the help of the study nurses and physicians of our daycare clinic, the technical assistants (A. Berthold), who performed the clinical examinations, data collection and experimental studies.

### LIFE Child

We thank all children and their legal guardians who participated in the study. We very gratefully appreciate the help of the study nurses, physicians, technicians and data manager, who performed the clinical examinations, data collection and experimental studies as part of the LIFE Child team.

### NFBC1986

We thank all cohort members and researchers who have participated in the study. We also wish to acknowledge the work of the NFBC project center.

### Raine Study Gen2

We would like to acknowledge the Raine Study participants and their families for their ongoing participation in the study and the Raine Study team for study co-ordination and data collection. We also thank the NHMRC for their long-term contribution to funding the study over the last 30 years. The core management of the Raine Study is funded by The University of Western Australia, Curtin University, Telethon Kids Institute, Women and Infants Research Foundation, Edith Cowan University, Murdoch University, The University of Notre Dame Australia and the Raine Medical Research Foundation.

## Funding

## INMA

This study was funded by grants from Instituto de Salud Carlos III (Red INMA G03/176; CB06/02/0041; PI041436; PI081151 incl. FEDER funds), Generalitat de Catalunya-CIRIT 1999SGR 00241, Fundació La marató de TV3 (090430), EU Commission (261357-MeDALL: Mechanisms of the Development of ALLergy), and European Research Council (268479-BREATHE: BRain dEvelopment and Air polluTion ultrafine particles in scHool childrEn). The study has received funding from the European Joint Programming Initiative “A Healthy Diet for a Healthy Life” (JPI HDHL and Instituto de Salud Carlos III) under the grant agreement no AC18/00006 (NutriPROGRAM project). We acknowledge support from the Spanish Ministry of Science and Innovation and State Research Agency through the “Centro de Excelencia Severo Ochoa 2019-2023” Program (CEX2018-000806-S), and support from the Generalitat de Catalunya through the CERCA Program.

## TEENDIAB

The TEENDIAB study was supported by Kompetenznetz Diabetes mellitus (Competence Network for Diabetes mellitus) funded by the Federal Ministry of Education and Research (FKZ 01GI0805), and by the ‘Diabetes Hilfs- und Forschungsfond Deutschland (DHFD)’. This study was supported by grants from the European Union’s Horizon 2020 Research and Innovation programme (no. 633595) for the DynaHEALTH action, by the H2020 Joint Programming Initiative a Healthy Diet for a Healthy Life (JPI HDHL) under proposal number 655 (PREcisE Project) and from the German Federal Ministry of Education and Research (FKZ 01EA1905).

## ATHEROBESITY

This work was supported by the German Research Foundation for the Clinical Research Center “Obesity Mechanisms” (grant CRC1052 C05) and project KO3512/3-1; and the Integrated Research and Treatment Centre Adiposity Diseases ADI K7-10. Furthermore, AK acknowledges support by the German Diabetes Association (DDG), the JPI HDHL Metadis funded CarbHealth consortium (01EA1908B). RS was funded by the joint Clinician Scientist Programme of the Medical Faculty and the Helmholtz Institute for Metabolic, Obesity and Vascular Research of the Helmholtz Zentrum München at the University of Leipzig.

## LIFE Child

The LIFE Child study is funded by means of the European Union, by means of the European Social Fund (ESF), by the European Regional Development Fund (ERDF), and by means of the Free State of Saxony as per the budget approved by the state parliament.

## NFBC1986

This work was supported by the European Union's Horizon 2020 research and innovation program under grant agreement No. 633595 (DynaHEALTH), grant agreement no. 733206 (LifeCycle), grant agreement no. 873749 (LongITools), grant agreement no. 848158 (EarlyCause). HHH was supported by Academy of Finland, Signe and Ane Gyllenberg Foundation, Sigrid Juselius Foundation, Foundation for Pediatric Research, Finnish Diabetes Research Foundation, and Novo Nordisk Foundation.

## Raine Study Gen2

The DNA methylation work was supported by Australian National Health Medical Research Council (NHRMC) grant 1059711. RH supported by NHMRC Fellowships (grant number 1053384).

The Pawsey Supercomputing Centre provided computation resources to carry out analyses required with funding from the Australian Government and the Government of Western Australia. Data used from the Raine Study Gen2-14 year follow-up was collected using funding from the NHMRC (Sly et al, ID 211912, Palmer et al, ID 572613, Beilin et al, ID 403981), NHMRC Program Grant (Stanley et al, ID 003209) and the Raine Medical Research Foundation.

## The Leipzig Childhood Adipose Tissue Cohort

This work was supported by grants from the Deutsche Forschungsgemeinschaft (DFG, German Research Foundation)– Projektnummer 209933838 – SFB 1052 project C05 to AK, by the Federal Ministry of Education and Research (BMBF), Germany, FKZ: 01EO1501 (IFB Adiposity Diseases), and by the German Diabetes

Associations (DDG). This project was supported by the HI-MAG Project Funding for Young Scientists of the Medical Faculty of the University Leipzig to KL.

### Leanne K. Küpers

LKK has received funding from the European Joint Programming Initiative “A Healthy Diet for a Healthy Life” (JPI HDHL, NutriPROGRAM project, ZonMw the Netherlands no.529051022 and PREcisE project, ZonMw the Netherlands no.529051023.)

### Elmar W. Tobi

EWT was supported by a VENI grant from the Netherlands Organization for Scientific Research (91617128) and funded by the Joint Programming Initiative – A Healthy Diet for a Healthy Life (JPI HDHL) (proposal number 655), which is funded by ZonMw in the Netherlands [529051023].

### Cristina Campoy

CC has received funding from the IMPACT DIABETES B2B EU Project Horizon 2020; EU Commission. GA: 847984; H2020-SC1-2019-Two-Stage-RTD, and PREciSE, “Nutrition & the Epigenome”; EU Commission; JPI a Healthy Diet for a Healthy Life; ERA-HDHL-Epigenetics, and GD-BRAIN, Ministry of Economy & Competitiveness – Ref. No: SAF2015-69265-C2-1-R, and DynaHEALTH EU Project Horizon 2020, Grant Agreement No 633595.

## References of the supplemental information

1. Guxens M, Ballester F, Espada M, Fernández MF, Grimalt JO, Ibarluzea J, et al. Cohort Profile: The INMA-INfancia y Medio Ambiente-(Environment and Childhood) Project. *Int J Epidemiol.* 2012;41(4):930–40.
2. Ziegler AG, Meier-Stiegen F, Winkler C, Bonifacio E. Prospective evaluation of risk factors for the development of islet autoimmunity and type 1 diabetes during puberty - TEENDIAB: Study design. *Pediatr Diabetes.* 2012;13(5):419–24.
3. Friebe D, Neef M, Kratzsch J, Erbs S, Dittrich K, Garten A, et al. Leucocytes are a major source of circulating nicotinamide phosphoribosyltransferase (NAMPT)/pre-B cell colony (PBEF)/visfatin linking obesity and inflammation in humans. *Diabetologia.* 2011;54(5):1200.
4. Landgraf K, Friebe D, Ullrich T, Kratzsch J, Dittrich K, Herberth G, et al. Chemerin as a mediator between obesity and vascular inflammation in children. *J Clin Endocrinol Metab.* 2012;97(4).
5. Poulain T, Baber R, Vogel M, Pietzner D, Kirsten T, Jurkutat A, et al. The LIFE Child study: a population-based perinatal and pediatric cohort in Germany. *Eur J Epidemiol.* 2017;32(2):145–58.
6. Järvelin MR, Hartikainen-Sorri A -L, Rantakallio P. Labour induction policy in hospitals of different levels of specialisation. *BJOG.* 1993;100(4):310–5.
7. Newnham JP, Evans SF, Michael CA, Stanley FJ, Landau LI. Effects of frequent ultrasound during pregnancy: a randomised controlled trial. *The Lancet.* 1993;342(8876):887–91.
8. Lampert T, Hoebel J, Kuntz B, Müters S, Kroll LE. Messung des sozioökonomischen Status und des subjektiven sozialen Status in KiGGS Welle 2. *J Health Monit.* 2018;3(1):114-133.
9. Vioque J, Gimenez-Monzo D, Navarrete-Muñoz EM, Garcia-De-la-hera M, Gonzalez-Palacios S, Rebagliato M, et al. Reproducibility and Validity of a Food Frequency Questionnaire Designed to Assess Diet in Children Aged 4-5 Years. *PLoS One.* 2016;11(11).
10. Weber KS, Raab J, Haupt F, Aschemeier B, Wosch A, Ried C, et al. Evaluating the diet of children at increased risk for type 1 diabetes: First results from the TEENDIAB study. *Public Health Nutr.* 2015;18(1):50–8.



11. Stiegler P, Sausenthaler S, Buyken AE, Rzehak P, Czech D, Linseisen J, et al. A new FFQ designed to measure the intake of fatty acids and antioxidants in children. *Public Health Nutr.* 2010;13(1):38–46.
12. O’Sullivan TA, Lyons-Wall P, Bremner AP, Ambrosini GL, Huang RC, Beilin LJ, et al. Dietary glycaemic carbohydrate in relation to the metabolic syndrome in adolescents: comparison of different metabolic syndrome definitions. *Diabetic Medicine.* 2010;27(7):770–8.
13. Aryee MJ, Jaffe AE, Corrada-Bravo H, Ladd-Acosta C, Feinberg AP, Hansen KD, et al. Minfi: a flexible and comprehensive Bioconductor package for the analysis of Infinium DNA methylation microarrays. *Bioinformatics.* 2014;30(10):1363–9.
14. van Iterson M, Tobi EW, Sliker RC, den Hollander W, Luijk R, Slagboom PE, et al. MethylAid: visual and interactive quality control of large Illumina 450k datasets. *Bioinformatics.* 2014;30(23):3435–7.
15. Fortin JP, Fertig E, Hansen K. shinyMethyl: Interactive quality control of Illumina 450k DNA methylation arrays in R. *F1000Res.* 2014;3.
16. Lehne B, Drong AW, Loh M, Zhang W, Scott WR, Tan ST, et al. A coherent approach for analysis of the Illumina HumanMethylation450 BeadChip improves data quality and performance in epigenome-wide association studies. *Genome Biol.* 2015;16(1):1–12.
17. Johnson WE, Li C, Rabinovic A. Adjusting batch effects in microarray expression data using empirical Bayes methods. *Biostatistics.* 2007;8(1):118–27.
18. Reinius LE, Acevedo N, Joerink M, Pershagen G, Dahlén SE, Greco D, et al. Differential DNA Methylation in Purified Human Blood Cells: Implications for Cell Lineage and Studies on Disease Susceptibility. *PLoS One.* 2012;7(7):e41361.
19. Houseman EA, Molitor J, Marsit CJ. Reference-free cell mixture adjustments in analysis of DNA methylation data. *Bioinformatics.* 2014;30(10):1431–9.
20. Leek JT, Johnson WE, Parker HS, Jaffe AE, Storey JD. The sva package for removing batch effects and other unwanted variation in high-throughput experiments. *Bioinformatics.* 2012;28(6):882–3.
21. Tian Y, Morris TJ, Webster AP, Yang Z, Beck S, Feber A, et al. ChAMP: updated methylation analysis pipeline for Illumina BeadChips. *Bioinformatics.* 2017;33(24):3982–4.
22. Nordlund J, Bäcklin CL, Wahlberg P, Busche S, Berglund EC, Eloranta ML, et al. Genome-wide signatures of differential DNA methylation in pediatric acute lymphoblastic leukemia. *Genome Biol.* 2013;14(9):1–15.
23. Teschendorff AE, Marabita F, Lechner M, Bartlett T, Tegner J, Gomez-Cabrero D, et al. A beta-mixture quantile normalization method for correcting probe design bias in Illumina Infinium 450 k DNA methylation data. *Bioinformatics.* 2013 Jan;29(2):189–96.
24. Fortin JP, Labbe A, Lemire M, Zanke BW, Hudson TJ, Fertig EJ, et al. Functional normalization of 450k methylation array data improves replication in large cancer studies. *Genome Biol.* 2014;15(11):503.
25. Houseman EA, Molitor J, Marsit CJ. Reference-free cell mixture adjustments in analysis of DNA methylation data. *Bioinformatics.* 2014;30(10):1431–9.
26. Assenov Y, Müller F, Lutsik P, Walter J, Lengauer T, Bock C. Comprehensive Analysis of DNA Methylation Data with RnBeads. *Nat Methods.* 2014;11(11):1138.
27. Gaunt TR, Shihab HA, Hemani G, Min JL, Woodward G, Lyttleton O, et al. Systematic identification of genetic influences on methylation across the human life course. *Genome Biol.* 2016;17(1):61.
28. Landgraf K, Rockstroh D, Wagner I v., Weise S, Tauscher R, Schwartze JT, et al. Evidence of Early Alterations in Adipose Tissue Biology and Function and Its Association With Obesity-Related Inflammation and Insulin Resistance in Children. *Diabetes.* 2015;64(4):1249–61.

29. Barbosa-Morais NL, Dunning MJ, Samarajiwa SA, Darot JFJ, Ritchie ME, Lynch AG, et al. A re-annotation pipeline for Illumina BeadArrays: improving the interpretation of gene expression data. *Nucleic Acids Res.* 2010;38(3):e17.
